# Supplementary material for: Synthesis of α-functionalized α-indol-3-yl carbonyls through direct SN reactions of indol-3-yl α-acyloins
Source: Royal Society of Chemistry journal article supplement (doi:10.1039/c6ob02125e), 2016-01-01

# Electronic Supplementary Information

for

## Synthesis of $\alpha$ -Functionalized $\alpha$ -Indol-3-yl Carbonyls through Direct $S_N$ Reactions of Indol-3-yl $\alpha$ -Acyloins

Anisley Suárez, Fernando Martínez, and Roberto Sanz\*

*Área de Química Orgánica, Departamento de Química, Facultad de Ciencias, Universidad de Burgos, Pza. Misael Bañuelos s/n, 09001-Burgos (Spain)*

### Table of Contents

|                                                                                                   |      |
|---------------------------------------------------------------------------------------------------|------|
| General considerations .....                                                                      | S 2  |
| Synthesis of $\alpha$ -acyloins <b>3</b> .....                                                    | S 3  |
| Spectroscopic and characterization data for new $\alpha$ -acyloin <b>3e</b> .....                 | S 3  |
| General procedure for the synthesis of $\alpha$ -(indol-3-yl) carbonyl compounds <b>6-9</b> ..... | S 3  |
| Spectroscopic and characterization data for compounds <b>6-9</b> .....                            | S 4  |
| General procedure for the synthesis of tryptophol derivatives <b>10</b> .....                     | S 15 |
| Spectroscopic and characterization data for compounds <b>10</b> .....                             | S 16 |
| General procedure for the synthesis of tricarbonyl compounds <b>11</b> .....                      | S 17 |
| Spectroscopic and characterization data for compounds <b>11</b> .....                             | S 17 |
| General procedure for the synthesis of furanylindoles <b>12</b> and <b>13</b> .....               | S 20 |
| Spectroscopic and characterization data for compounds <b>12</b> and <b>13</b> .....               | S 20 |
| $^1\text{H}$ and $^{13}\text{C}$ NMR spectra of characterized compounds .....                     | S 23 |

## General considerations:

All reactions involving air sensitive compounds were carried out under a N<sub>2</sub> atmosphere (99.99%). All glassware was oven-dried (120 °C), evacuated and purged with nitrogen. All common reagents and solvents were obtained from commercial suppliers and used without any further purification. Solvents were dried by standard methods. Hexane and ethyl acetate were purchased as extra pure grade reagents and used as received. TLC was performed on aluminum-backed plates coated with silica gel 60 with F<sub>254</sub> indicator; the chromatograms were visualized under ultraviolet light and/or by staining with a Ce/Mo reagent and subsequent heating. R<sub>f</sub> values are reported on silica gel. Flash column chromatography was carried out on silica gel 60, 230-240 mesh. Deactivated silica gel was obtained by stirring with an aqueous K<sub>2</sub>HPO<sub>4</sub> solution for 3 h and subsequent filtration and drying at 140 °C for 3 days. <sup>1</sup>H NMR spectra were recorded at 300 or 400 MHz. Chemical shifts are reported in ppm using the residual solvent peak as reference. Data are reported as follows: chemical shift, multiplicity (s: singlet, bs: broad singlet, d: doublet, t: triplet, at: apparent triplet, dd: doublet of doublets, dt: doublet of triplets, ddd: doublet of doublet of doublets, m: multiplet), coupling constant (*J* in Hz), and integration. <sup>13</sup>C NMR spectra were recorded at 75.4 MHz or 100.6 MHz using broadband proton decoupling and chemical shifts are reported in ppm using residual solvent peaks as reference and the multiplicities were determined by DEPT experiments. High resolution mass spectra (HRMS) were recorded on a Micromass Autospec spectrometer equipped with a magnetic sector ion analyzer using EI at 70eV. Melting points were measured on a Gallenkamp apparatus using open capillary tubes and are uncorrected. GC-MS and low resolution mass spectra (LRMS) measurements were recorded on an Agilent 6890N/5973 Network GC System, equipped with a HP-5MS column.

### Synthesis of $\alpha$ -acyloins **3**:

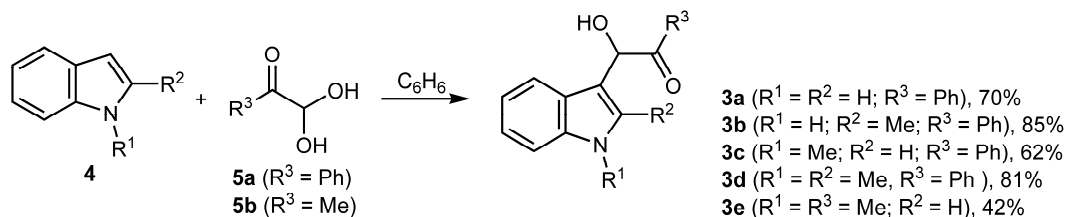

Acyloins **3a-d** were prepared by reaction of phenyl glyoxal (5 mmol) with the corresponding indole (5 mmol) in benzene following a reported procedure.<sup>[1]</sup> Acyloin **3e** was prepared in the same way from pyruvic aldehyde (**5b**) (1.5 mL of a 40% w/w aqueous solution, 10 mmol) and *N*-methylindole (**4c**) (1.31 g, 10 mmol) in benzene (20 mL) at r.t. for 16 h. Characterization data for acyloins **3a-d** have been previously reported.<sup>1,2</sup>

### Spectroscopic and characterization data for new $\alpha$ -acyloin **3e**:

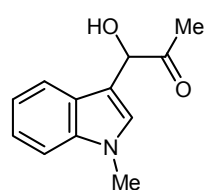

**1-Hydroxy-1-(1-methyl-1H-indol-3-yl)propan-2-one (3e)**: White foam; yield = 42% (0.85 g);  $R_f = 0.20$  (hexane/EtOAc, 2:1);  $^1\text{H NMR}$  (300 MHz,  $\text{CDCl}_3$ ):  $\delta$  (ppm) = 2.08 (s, 3H), 3.67 (s, 3H), 4.40 (bs, 1H), 5.35 (s, 1H), 7.07 (s, 1H), 7.12–7.20 (m, 1H), 7.22–7.36 (m, 2H), 7.52–7.60 (m, 1H);  $^{13}\text{C NMR}$  (75.4 MHz,  $\text{CDCl}_3$ ):  $\delta$

(ppm) = 25.0 ( $\text{CH}_3$ ), 32.5 ( $\text{CH}_3$ ), 73.2 (CH), 109.5 (CH), 110.9 (C), 118.9 (CH), 119.6 (CH), 122.9 (CH), 125.6 (C), 128.6 (CH), 137.1 (C), 208.2 (C); LRMS (70 eV, EI):  $m/z$  (%) 203 ( $\text{M}^+$ , 13), 158 (100); HRMS ( $\text{EI}^+$ ) calcd for  $\text{C}_{12}\text{H}_{13}\text{NO}_2$ : 203.0946, found: 203.0945.

### General procedure for the synthesis of $\alpha$ -(indol-3-yl) carbonyl compounds **6-9**:

PTSA (5 mol%, 9 mg) was added to a solution of the corresponding  $\alpha$ -acyloin **3** (1 mmol) and nucleophile (1 mmol for the synthesis of **6-8**, 1.1 mmol of *p*-nitroaniline for the synthesis of **9**) in MeCN (2 mL). The resulting reaction mixture was stirred until the final product precipitates or the starting acyloin was consumed as determined by TLC (0.25–16 h). In the first case, the precipitated product was isolated in pure form by simple filtration, whereas in the last case, the crude mixture was quenched with aqueous NaOH (0.5 M) and extracted with DCM (3  $\times$  10 mL). The combined organic layers were dried over anhydrous  $\text{Na}_2\text{SO}_4$  and concentrated at reduced

<sup>1</sup> S. P. Ivonin, A. V. Lapandin, A. A. Anishchenko, V. G. Shtamburg, *Synth. Commun.*, 2004, **34**, 451.

<sup>2</sup> L. Guanghui, C. Xu, Z. Yang, L. Weijian, H. Li, W. Yong, *Chem. Res. Chin. Univ.*, 2016, **32**, 212.

pressure. The residue was purified by flash chromatography on silica gel (deactivated in the case of **7f,g**) using mixtures of hexane and EtOAc as eluents to obtain the corresponding  $\alpha$ -(indol-3-yl) carbonyl compounds derivatives **6-9** in the yields reported in Tables 1-2 or Schemes 3-4.

### Spectroscopic and characterization data for compounds 6–9:

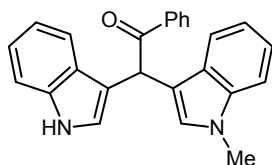

#### **2-(1*H*-Indol-3-yl)-2-(1-methyl-1*H*-indol-3-yl)-1-phenylethanone (6ac):**

Brown solid; yield = 92% (335 mg); mp = 204–206 °C;  $^1\text{H}$  NMR (400 MHz,  $\text{CDCl}_3$ ):  $\delta$  (ppm) = 3.71 (s, 3H), 6.57 (s, 1H), 6.89 (s, 1H), 6.96–7.02 (m, 1H), 7.09–7.17 (m, 2H), 7.19–7.24 (m, 1H), 7.25–7.28 (m, 1H), 7.28–7.33 (m, 1H), 7.34–7.39 (m, 1H), 7.42–7.48 (m, 2H), 7.52–7.57 (m, 1H), 7.59–7.64 (m, 2H), 8.12 (s, 1H), 8.14–8.20 (m, 2H);  $^{13}\text{C}$  NMR (75.4 MHz,  $\text{CDCl}_3$ ):  $\delta$  (ppm) = 32.9 ( $\text{CH}_3$ ), 42.0 (CH), 109.5 (CH), 111.4 (CH), 112.7 (C), 114.6 (C), 119.14 (CH), 119.29 (CH), 119.3 (CH), 119.8 (CH), 121.9 (CH), 122.3 (CH), 124.0 (CH), 126.7 (C), 127.2 (C), 128.7, (2  $\times$  CH), 128.9 (2  $\times$  CH), 133.0 (CH), 136.6 (C), 137.1 (C), 137.4 (C), 198.8 (C) one aromatic carbon peak was missing due to overlapping; LRMS (70 eV, EI):  $m/z$  (%) 364 ( $\text{M}^+$ , 3), 259 (100); HRMS ( $\text{EI}^+$ ) calcd for  $\text{C}_{25}\text{H}_{20}\text{N}_2\text{O}$ : 364.1576, found: 364.1577.

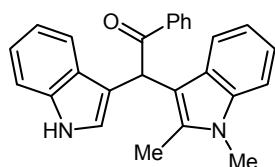

#### **2-(1,2-Dimethyl-1*H*-indol-3-yl)-2-(1*H*-indol-3-yl)-1-phenylethanone (6ad):**

Violet solid; yield = 86% (325 mg); mp = 105–107 °C;  $^1\text{H}$  NMR (300 MHz,  $(\text{CD}_3)_2\text{CO}$ ):  $\delta$  (ppm) = 2.40 (s, 3H), 3.63 (s, 3H), 6.43 (d,  $J$  = 1.1 Hz, 1H), 6.85 (dd,  $J$  = 2.5, 1.1 Hz, 1H), 7.00–7.10 (m, 2H), 7.12–7.19 (m, 2H), 7.25 (d,  $J$  = 8.0 Hz, 1H), 7.28–7.43 (m, 4H), 7.44–7.51 (m, 1H), 7.69 (d,  $J$  = 7.9 Hz, 1H), 7.97 (s, 1H), 8.04–8.10 (m, 2H);  $^{13}\text{C}$  NMR (75.4 MHz,  $(\text{CD}_3)_2\text{CO}$ ):  $\delta$  (ppm) = 11.0 ( $\text{CH}_3$ ), 29.7 ( $\text{CH}_3$ ), 42.6 (CH), 107.5 (C), 108.8 (CH), 111.4 (CH), 114.8 (C), 119.05 (CH), 119.1 (CH), 119.4 (CH), 119.6 (CH), 120.8 (CH), 122.1 (CH), 127.1 (C), 127.3 (C), 128.6 (2  $\times$  CH), 128.7 (2  $\times$  CH), 132.7 (CH), 134.6 (C), 136.6 (C), 136.9 (C), 137.4 (C), 198.1 (C); LRMS (70 eV, EI):  $m/z$  (%) 378 ( $\text{M}^+$ , 3), 273 (100); HRMS ( $\text{EI}^+$ ) calcd for  $\text{C}_{26}\text{H}_{22}\text{N}_2\text{O}$ : 378.1732, found: 378.1730.

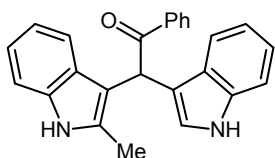

**2-(1*H*-Indol-3-yl)-2-(2-methyl-1*H*-indol-3-yl)-1-phenylethanone (6ba):**

Yellow solid; yield = 99% (361 mg); mp = 220–222 °C; <sup>1</sup>H NMR (400 MHz, CDCl<sub>3</sub>): δ (ppm) = 2.24 (s, 3H), 6.38 (s, 1H), 6.71 (s, 1H), 7.02 (d, *J* = 7.8

Hz, 1H), 7.05–7.19 (m, 3H), 7.21–7.24 (m, 1H), 7.33–7.41 (m, 4H), 7.44–7.50 (m, 1H), 7.60–7.65 (m, 1H), 7.83 (s, 1H), 7.95 (s, 1H), 8.04–8.09 (m, 2H); <sup>13</sup>C NMR (75.4 MHz, CDCl<sub>3</sub>): δ (ppm) = 12.4 (CH<sub>3</sub>), 42.4 (CH), 108.2 (C), 110.5 (CH), 111.5 (CH), 114.3 (C), 118.9 (CH), 119.0 (CH), 119.6 (CH), 119.7 (CH), 121.2 (C), 122.1 (CH), 124.3 (CH), 127.0 (C), 128.2 (C), 128.6 (2 × CH), 128.7 (2 × CH), 132.8 (CH), 132.9 (CH), 135.3 (C), 136.6 (C), 137.3 (C), 198.4 (C); LRMS (70 eV, EI): *m/z* (%) 364 (M<sup>+</sup>, 2), 259 (100); HRMS (EI<sup>+</sup>) calcd for C<sub>25</sub>H<sub>20</sub>N<sub>2</sub>O: 364.1576, found: 364.1581.

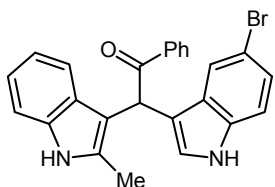

**2-(5-Bromo-1*H*-indol-3-yl)-2-(2-methyl-1*H*-indol-3-yl)-1-phenylethanone (6be):**

White solid; yield = 93% (412 mg); mp = 152–154 °C; <sup>1</sup>H NMR (300 MHz, CDCl<sub>3</sub>): δ (ppm) = 2.30 (s, 3H), 6.28 (s, 1H), 6.65 (s, 1H), 7.00–7.12

(m, 3H), 7.14–7.27 (m, 2H), 7.33–7.40 (m, 2H), 7.44–7.52 (m, 2H), 7.57 (d, *J* = 7.8 Hz, 1H), 7.91 (s, 1H), 8.02–8.10 (m, 3H); <sup>13</sup>C NMR (75.4 MHz, CDCl<sub>3</sub>): δ (ppm) = 12.4 (CH<sub>3</sub>), 42.3 (CH), 108.0 (C), 110.5 (CH), 112.9 (CH), 113.0 (CH), 114.0 (C), 118.9 (CH), 119.8 (CH), 121.4 (CH), 121.5 (CH), 124.9 (CH), 125.7 (CH), 127.9 (C), 128.7 (4 × CH), 132.7 (C), 133.0 (C), 135.26 (C), 135.35 (C), 136.9 (C), 198.1 (C), one aromatic carbon peak was missing due to overlapping; LRMS (70 eV, EI): *m/z* (%) 444 [(M+2)<sup>+</sup>, 3], 442 (M<sup>+</sup>, 2); 339 (99) 337 (100); HRMS (EI<sup>+</sup>) calcd for C<sub>18</sub>H<sub>14</sub>BrN<sub>2</sub> (M–C<sub>7</sub>H<sub>5</sub>O)<sup>+</sup>: 337.0340, found, 337.0339.

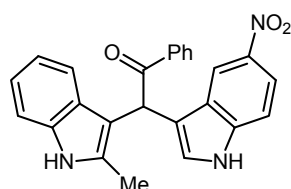

**2-(2-Methyl-1*H*-indol-3-yl)-2-(5-nitro-1*H*-indol-3-yl)-1-phenylethanone (6bf):**

Yellow solid; yield = 91% (373 mg); mp = 145–147 °C; <sup>1</sup>H NMR (300 MHz, (CD<sub>3</sub>)<sub>2</sub>SO): δ (ppm) = 2.40 (s, 3H), 6.69 (s, 1H), 6.85–6.98 (m, 2H),

7.10 (s, 1H), 7.20 (d, *J* = 7.8 Hz, 1H), 7.42 (at, *J* = 7.4 Hz, 2H), 7.46–7.56 (m, 3H), 7.97 (dd, *J* = 9.0, 1.0 Hz, 1H), 8.07 (d, *J* = 8.1 Hz, 2H), 8.42 (s, 1H), 10.98 (s, 1H), 11.57 (s, 1H); <sup>13</sup>C NMR (75.4 MHz, (CD<sub>3</sub>)<sub>2</sub>SO): δ (ppm) = 11.9 (CH<sub>3</sub>), 41.5 (CH), 106.8 (C), 110.7 (CH), 112.0 (CH), 116.5 (CH), 116.6 (CH), 116.7 (C), 118.3 (CH), 118.7 (CH), 120.3 (CH), 126.3 (C), 127.3 (C), 128.2 (CH), 128.4 (2 × CH), 128.6 (2 × CH), 132.8 (CH), 133.4 (C), 135.4 (C), 136.8 (C),

139.7 (C), 140.2 (C), 198.0 (C); LRMS (70 eV, EI):  $m/z$  (%) 409 ( $M^+$ , 2), 304 (100); HRMS ( $EI^+$ ) calcd for  $C_{25}H_{19}N_3O_3$ : 409.1426, found: 409.1429.

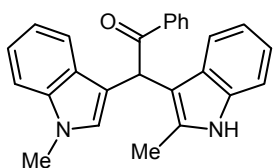

**2-(1-Methyl-1*H*-indol-3-yl)-2-(2-methyl-1*H*-indol-3-yl)-1-phenylethanone**

**(6cb):** Yellow solid; yield = 90% (340 mg); mp = 201–203 °C;  $^1H$  NMR (300 MHz,  $CDCl_3$ ):  $\delta$  (ppm) = 2.40 (s, 3H), 3.69 (s, 3H), 6.44 (s, 1H), 6.80 (s,

1H), 7.05–7.19 (m, 3H), 7.21–7.47 (m, 3H), 7.48–7.55 (m, 3H), 7.48–7.58 (m, 1H), 7.66–7.73 (m, 1H), 7.92 (s, 1H), 8.09–8.16 (m, 2H);  $^{13}C$  NMR (75.4 MHz,  $CDCl_3$ )  $\delta$  (ppm) = 12.4 ( $CH_3$ ), 32.8 ( $CH_3$ ), 42.3 (CH), 108.3 (C), 109.5 (CH), 110.4 (CH), 112.8 (C), 118.9 (CH), 119.1 (CH), 119.7 (CH), 121.2 (CH), 121.7 (CH), 127.4 (CH), 128.1 (CH), 128.6 (2  $\times$  CH), 128.7 (2  $\times$  CH), 128.8 (CH), 132.75 (C), 132.77 (C), 135.3 (C), 137.2 (C), 137.4 (C), 198.3 (C), one aromatic carbon peak was missing due to overlapping; LRMS (70 eV, EI):  $m/z$  (%) 378 ( $M^+$ , 4), 260 (100); HRMS ( $EI^+$ ) calcd for  $C_{26}H_{22}N_2O$ : 378.1732, found: 378.1733.

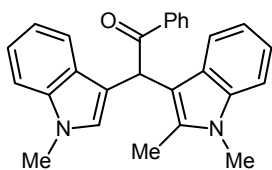

**2-(1,2-Dimethyl-1*H*-indol-3-yl)-2-(1-methyl-1*H*-indol-3-yl)-1-**

**phenylethanone (6cd):** Yellow solid; yield = 98% (384 mg); mp =

197–199 °C;  $^1H$  NMR (400 MHz,  $CDCl_3$ ):  $\delta$  (ppm) = 2.42 (s, 3H), 3.64 (s,

3H), 3.67 (s, 3H), 6.43 (s, 1H), 6.77 (s, 1H), 7.01–7.10 (m, 2H), 7.12–7.30 (m, 4H), 7.34–7.42 (m, 3H), 7.46 (t,  $J$  = 7.4 Hz, 1H), 7.69 (d,  $J$  = 7.8 Hz, 1H), 8.05–8.09 (m, 2H);  $^{13}C$  NMR (100.6 MHz,  $CDCl_3$ ):  $\delta$  (ppm) = 11.0 ( $CH_3$ ), 29.7 ( $CH_3$ ), 32.9 ( $CH_3$ ), 42.6 (CH), 107.7 (C), 108.8 (CH), 109.5 (CH), 113.2 (C), 119.07 (CH), 119.09 (CH), 119.2 (CH), 119.4 (CH), 120.8 (CH), 121.7 (CH), 127.2 (C), 127.5 (C), 128.6 (2  $\times$  CH), 128.7 (2  $\times$  CH), 128.9 (CH), 132.7 (CH), 134.5 (C), 136.9 (C), 137.4 (C), 198.1 (C), one aromatic carbon peak was missing due to overlapping; LRMS (70 eV, EI):  $m/z$  (%) 392 ( $M^+$ , 3), 287 (100); HRMS ( $EI^+$ ) calcd for  $C_{27}H_{24}N_2O$ : 392.1889, found: 392.1889.

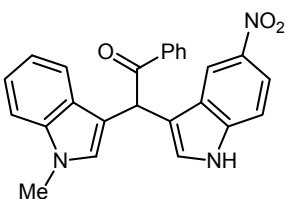

**2-(1-Methyl-1*H*-indol-3-yl)-2-(5-nitro-1*H*-indol-3-yl)-1-phenylethanone**

**(6cf):** Yellow solid; yield = 90% (368 mg); mp = 170–172 °C;  $^1H$  NMR (300

MHz,  $(CD_3)_2SO$ )  $\delta$  (ppm) = 3.68 (s, 3H), 6.88 (s, 1H), 6.96–7.04 (m, 1H), 7.08–7.14 (m, 1H), 7.17 (s, 1H), 7.35 (d,  $J$  = 8.2 Hz, 1H), 7.44–7.60 (m,

5H), 7.63 (d,  $J = 7.8$  Hz, 1H), 7.98 (dd,  $J = 9.0, 2.3$  Hz, 1H), 8.18–8.26 (m, 2H), 8.63 (d,  $J = 2.2$  Hz, 1H), 11.73 (s, 1H);  $^{13}\text{C}$  NMR (75.4 MHz,  $(\text{CD}_3)_2\text{SO}$ )  $\delta$  (ppm) = 32.4 ( $\text{CH}_3$ ) 41.1 (CH), 109.9 (CH), 111.7 (C), 112.1 (CH), 116.1 (C), 116.6 (2  $\times$  CH), 118.9 (CH), 119.2 (CH), 121.4 (CH), 125.9 (C), 126.6 (C), 128.5 (CH), 128.6 (CH), 128.8 (2  $\times$  CH), 133.2 (CH), 136.2 (C), 136.8 (C), 139.6 (C), 140.4 (C), 197.8 (C), one aromatic carbon peak was missing due to overlapping; LRMS (70 eV, EI):  $m/z$  (%) 409 ( $\text{M}^+$ , 3), 304 (100); HRMS ( $\text{EI}^+$ ) calcd for  $\text{C}_{25}\text{H}_{19}\text{N}_3\text{O}_3$ : 409.1426, found: 409.1428.

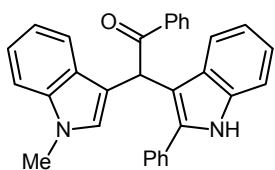

**2-(1H-Indol-3-yl)-2-(1-methyl-1H-indol-3-yl)-1-phenylethanone (6cg):**

White solid; yield = 95% (418 mg); mp = 240–242 °C;  $^1\text{H}$  NMR (300 MHz,  $(\text{CD}_3)_2\text{SO}$ ):  $\delta$  (ppm) = 3.69 (s, 3H), 6.40 (s, 1H), 6.86 (s, 1H), 6.89–6.98 (m, 2H), 7.05 (at,  $J = 7.5$  Hz, 1H), 7.10–7.18 (m, 2H), 7.24 (t,  $J = 7.3$  Hz, 2H), 7.35 (d,  $J = 8.1$  Hz, 1H), 7.39–7.51 (m, 8H), 7.61 (ad,  $J = 7.6$  Hz, 2H), 11.54 (s, 1H);  $^{13}\text{C}$  NMR (75.4 MHz,  $(\text{CD}_3)_2\text{SO}$ ):  $\delta$  (ppm) = 32.4 ( $\text{CH}_3$ ), 42.6 (CH), 107.7 (C), 109.8 (CH), 111.5 (CH), 112.6 (C), 118.7 (2  $\times$  CH), 119.2 (CH), 120.3 (CH), 121.2 (CH), 121.5 (CH), 126.8 (CH), 127.4 (CH), 127.9 (2  $\times$  CH), 128.2 (2  $\times$  CH), 128.5 (2  $\times$  CH), 129.0 (2  $\times$  CH), 132.3 (C), 132.8 (C), 136.0 (C), 136.2 (C), 136.3 (C), 136.9 (C), 196.8 (C), two aromatic carbon peaks were missing due to overlapping; LRMS (70 eV, EI):  $m/z$  (%) 440 ( $\text{M}^+$ , 2), 335 (100); HRMS ( $\text{EI}^+$ ) calcd for  $\text{C}_{31}\text{H}_{24}\text{N}_2\text{O}$ : 440.1889, found: 440.1889.

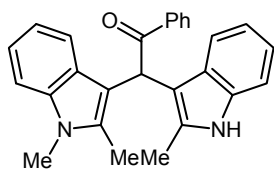

**2-(1,2-Dimethyl-1H-indol-3-yl)-2-(2-methyl-1H-indol-3-yl)-1-**

**phenylethanone (6db):** Yellow foam; yield = 89% (352 mg);  $R_f = 0.25$

(hexane/EtOAc, 5:1);  $^1\text{H}$  NMR (300 MHz,  $\text{CDCl}_3$ ):  $\delta$  (ppm) = 2.05 (s, 3H),

2.24 (s, 3H), 3.59 (s, 3H), 6.47 (s, 1H), 6.94–7.04 (m, 2H), 7.07 (d,  $J = 6.9$  Hz, 1H), 7.10–7.17 (m, 2H), 7.24 (d,  $J = 8.0$  Hz, 1H), 7.34–7.41 (m, 4H), 7.43–7.52 (m, 1H), 7.88 (s, 1H), 8.05–8.16 (m, 2H);  $^{13}\text{C}$  NMR (75.4 MHz,  $\text{CDCl}_3$ ):  $\delta$  (ppm) = 10.9 ( $\text{CH}_3$ ), 12.6 ( $\text{CH}_3$ ), 29.6 ( $\text{CH}_3$ ), 43.3 (CH), 108.8 (CH), 108.9 (C), 110.4 (CH), 118.5 (CH), 118.6 (CH), 118.7 (CH), 119.2 (CH), 119.4 (CH), 120.6 (CH), 120.9 (CH), 127.7 (C), 128.6 (2  $\times$  CH), 128.7 (2  $\times$  CH), 132.6 (C), 132.7 (C), 132.8 (C), 134.4 (C), 135.1 (C), 136.6 (C), 137.2 (C), 199.3 (C); LRMS (70 eV, EI):  $m/z$  (%) 392 ( $\text{M}^+$ , 3), 287 (100); HRMS ( $\text{EI}^+$ ) calcd for  $\text{C}_{27}\text{H}_{24}\text{N}_2\text{O}$ : 392.1889, found: 392.1890.

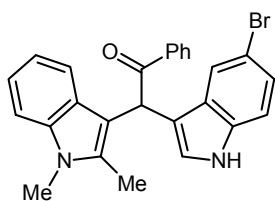

**2-(5-Bromo-1*H*-indol-3-yl)-2-(1,2-dimethyl-1*H*-indol-3-yl)-1-**

**phenylethanone (6de):** White solid; yield = 85% (388 mg); mp = 231–233

°C; <sup>1</sup>H NMR (400 MHz, (CD<sub>3</sub>)<sub>2</sub>SO): δ (ppm) = 2.41 (s, 3H), 3.59 (s, 3H),

6.55 (s, 1H), 6.89 (s, 1H), 6.92 (d, *J* = 7.9 Hz, 1H), 7.00 (at, *J* = 7.5 Hz,

1H), 7.14 (dd, *J* = 8.6, 1.9 Hz, 1H), 7.30 (ad, *J* = 8.5 Hz, 2H), 7.39 (t, *J* = 7.6 Hz, 2H), 7.47–7.54

(m, 3H), 8.02–8.07 (m, 2H), 11.01 (s, 1H); <sup>13</sup>C NMR (100.6 MHz, (CD<sub>3</sub>)<sub>2</sub>SO) δ (ppm) = 10.4 (CH<sub>3</sub>),

29.4 (CH<sub>3</sub>), 41.6 (CH), 106.9 (C), 109.2 (CH), 110.9 (C), 113.3 (C), 113.4 (CH), 118.5 (CH), 118.8

(CH), 120.2 (CH), 121.3 (CH), 123.3 (CH), 126.0 (CH), 126.4 (C), 128.3 (2 × CH), 128.5 (2 × CH),

128.7 (C), 132.7 (CH), 134.8 (C), 135.0 (C), 136.3 (C), 136.9 (C), 197.9 (C); LRMS (70 eV, EI): *m/z*

(%) 458 [(*M*+2)<sup>+</sup>, 5], 456 (*M*<sup>+</sup>, 5), 353 (100), 351 (100); HRMS (EI<sup>+</sup>) calcd for C<sub>26</sub>H<sub>21</sub>BrN<sub>2</sub>O:

456.0837, found: 456.0836.

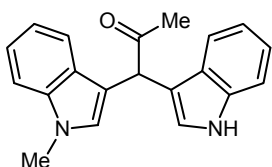

**1-(1*H*-indol-3-yl)-1-(1-methyl-1*H*-indol-3-yl)propan-2-one (6ea):** White

foam; yield = 70% (211 mg); *R<sub>f</sub>* = 0.25 (hexane/EtOAc, 4:1); <sup>1</sup>H NMR (300

MHz, CDCl<sub>3</sub>): δ (ppm) = 2.33 (s, 3H), 3.71 (s, 3H), 5.56 (s, 1H), 6.93 (s,

1H), 7.03–7.06 (m, 1H), 7.08–7.14 (m, 2H), 7.16–7.27 (m, 2H), 7.28–7.37 (m, 2H), 7.58 (d, *J* = 7.9

Hz, 2H), 8.13 (s, 1H); <sup>13</sup>C NMR (75.4 MHz, CDCl<sub>3</sub>) δ (ppm) = 29.0 (CH<sub>3</sub>), 32.8 (CH<sub>3</sub>), 48.1 (CH),

109.5 (CH), 111.5 (CH), 111.9 (C), 113.4 (C), 119.2 (CH), 119.2 (2 × CH), 119.7 (CH), 121.9 (CH),

122.3 (CH), 123.5 (CH), 126.8 (C), 127.3 (C), 128.2 (CH), 136.5 (C), 137.2 (C), 207.6 (C); LRMS

(70 eV, EI): *m/z* (%) 302 (*M*<sup>+</sup>, 2), 259 (100); HRMS (EI<sup>+</sup>) calcd for C<sub>20</sub>H<sub>18</sub>N<sub>2</sub>O: 302.1419, found:

302.1412.

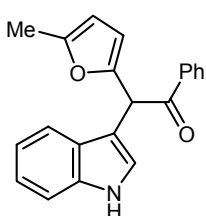

**2-(1*H*-Indol-3-yl)-2-(5-methylfuran-2-yl)-1-phenylethanone (7a):** Yellow solid;

yield = 73% (230 mg); mp = 146–148 °C; <sup>1</sup>H NMR (300 MHz, CDCl<sub>3</sub>): δ (ppm) =

2.55 (s, 3H), 5.88 (dd, *J* = 2.9, 0.9 Hz, 1H), 5.97 (d, *J* = 3.0 Hz, 1H), 6.27 (s, 1H),

7.07 (d, *J* = 2.5 Hz, 1H), 7.15 (ddd, *J* = 7.6, 7.1, 1.3 Hz, 1H), 7.18–7.24 (m, 1H),

7.32–7.44 (m, 3H), 7.48–7.54 (m, 1H), 7.64–7.67 (m, 1H), 8.03–8.09 (m, 2H), 8.24 (s, 1H); <sup>13</sup>C

NMR (75.4 MHz, CDCl<sub>3</sub>): δ (ppm) = 13.8 (CH<sub>3</sub>), 44.8 (CH), 106.5 (CH), 109.5 (CH), 111.3 (C),

111.5 (CH), 118.9 (CH), 120.0 (CH), 122.5 (CH), 124.1 (CH), 126.5 (C), 128.7 (2 × CH), 129.0 (2 ×



CH), 133.1 (CH), 136.4 (C), 150.8 (C), 151.8 (C), 196.4 (C), one aromatic carbon peak was missing due to overlapping; LRMS (70 eV, EI):  $m/z$  (%) 315 ( $M^+$ , 3), 210 (100); HRMS ( $EI^+$ ) calcd for  $C_{21}H_{17}NO_2$ : 315.1259, found: 315.1259.

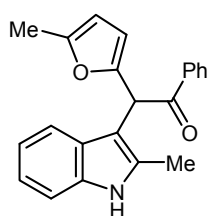

**2-(2-Methyl-1H-indol-3-yl)-2-(5-methylfuran-2-yl)-1-phenylethanone (7b):**

Yellow solid; yield = 69% (227 mg); mp = 80–82 °C;  $^1H$  NMR (300 MHz,  $CDCl_3$ ):

$\delta$  (ppm) = 2.30 (s, 3H), 2.42 (s, 3H), 5.88–5.96 (m, 2H), 6.15 (s, 1H), 7.09–7.18 (m, 2H), 7.29–7.31 (m, 1H), 7.33–7.41 (m, 2H), 7.45–7.50 (m, 1H), 7.63–7.70

(m, 1H), 7.95–8.03 (m, 3H);  $^{13}C$  NMR (75.4 MHz,  $CDCl_3$ ):  $\delta$  (ppm) = 12.4 ( $CH_3$ ), 13.7 ( $CH_3$ ), 45.0 (CH), 106.2 (C), 106.3 (CH), 109.6 (CH), 110.5 (CH), 118.6 (CH), 119.9 (CH), 121.4 (CH), 127.8 (C), 128.5 (2  $\times$  CH), 128.6 (2  $\times$  CH), 132.9 (CH), 133.2 (C), 135.3 (C), 136.6 (C), 150.6 (C), 151.7 (C), 196.4 (C); LRMS (70 eV, EI):  $m/z$  (%) 329 ( $M^+$ , 2), 224 (100); HRMS ( $EI^+$ ) calcd for  $C_{22}H_{19}NO_2$ : 329.1416, found: 329.1414.

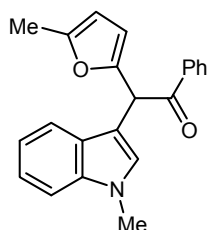

**2-(1-Methyl-1H-indol-3-yl)-2-(5-methylfuran-2-yl)-1-phenylethanone (7c):**

Yellow solid; yield = 81% (266 mg); mp = 154–156 °C;  $^1H$  NMR (300 MHz,  $CDCl_3$ ):

$\delta$  (ppm) = 2.29 (s, 3H), 3.72 (s, 3H), 5.89–5.92 (m, 1H), 6.02 (d,  $J$  = 2.1 Hz, 1H), 6.29 (s, 1H), 7.04 (s, 1H), 7.13–7.20 (m, 1H), 7.23–7.34 (m, 2H), 7.41

(ddd,  $J$  = 8.3, 2.3, 0.9 Hz, 2H), 7.49–7.55 (m, 1H), 7.65–7.70 (m, 1H), 8.06–8.11 (m, 2H);  $^{13}C$  NMR (75.4 MHz,  $CDCl_3$ ):  $\delta$  (ppm) = 13.8 ( $CH_3$ ), 32.9 ( $CH_3$ ), 44.6 (CH), 106.5 (CH), 109.4 (CH), 109.5 (CH), 109.7 (C), 119.0 (CH), 119.5 (CH), 122.0 (CH), 126.9 (C), 128.5 (CH), 128.6 (2  $\times$  CH), 128.9 (2  $\times$  CH), 133.1 (CH), 136.4 (C), 137.2 (C), 151.1 (C), 151.7 (C), 196.2 (C); LRMS (70 eV, EI):  $m/z$  (%) 329 ( $M^+$ , 3), 224 (100); HRMS ( $EI^+$ ) calcd for  $C_{22}H_{19}NO_2$ : 329.1416, found: 329.1417.

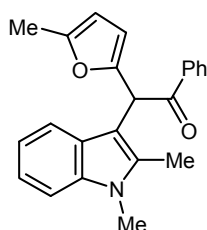

**2-(1,2-Dimethyl-1H-indol-3-yl)-2-(5-methylfuran-2-yl)-1-phenylethanone (7d):**

Yellow foam; yield = 65% (223 mg); mp = 112–114 °C;  $^1H$  NMR (300 MHz,  $CDCl_3$ ):

$\delta$  (ppm) = 2.29 (s, 3H), 2.42 (s, 3H), 3.61 (s, 3H), 5.89–5.90 (m, 1H), 5.93 (d,  $J$  = 2.4 Hz, 1H), 6.17 (s, 1H), 7.07–7.26 (m, 3H), 7.31–7.35 (m, 2H), 7.41–7.47 (m, 1H), 7.67 (d,  $J$  = 7.4 Hz, 1H), 7.95–8.03 (m, 2H);  $^{13}C$  NMR (75.4

MHz, CDCl<sub>3</sub>):  $\delta$  (ppm) = 10.9 (CH<sub>3</sub>), 13.8 (CH<sub>3</sub>), 29.7 (CH<sub>3</sub>), 45.2 (CH), 105.6 (C), 106.3 (CH), 108.8 (CH), 109.6 (CH), 118.7 (CH), 119.6 (CH), 121.0 (CH), 126.8 (C), 128.5 (2  $\times$  CH), 128.6 (2  $\times$  CH), 132.8 (CH), 134.9 (C), 136.6 (C), 136.8 (C), 150.9 (C), 151.6 (C), 196.2 (C); LRMS (70 eV, EI):  $m/z$  (%) 343 (M<sup>+</sup>, 2), 238 (100); HRMS (EI<sup>+</sup>) calcd for C<sub>23</sub>H<sub>21</sub>NO<sub>2</sub>: 343.1572, found: 343.1568.

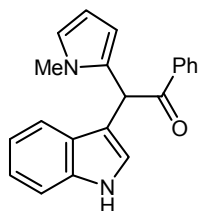

**2-(1H-Indol-3-yl)-2-(1-methyl-1H-pyrrol-2-yl)-1-phenylethanone (7e):** Yellow foam; yield = 50% (157 mg); mp = 144–146 °C; <sup>1</sup>H NMR (300 MHz, CDCl<sub>3</sub>):  $\delta$  (ppm) = 3.51 (s, 3H), 5.91–5.94 (m, 1H), 6.07 (dd,  $J$  = 3.6, 2.8 Hz, 1H), 6.21 (s, 1H), 6.63–6.67 (m, 1H), 6.83 (d,  $J$  = 2.1 Hz, 1H), 7.10 (ddd,  $J$  = 8.0, 7.1, 1.1 Hz,

1H), 7.15–7.22 (m, 1H), 7.32 (dd,  $J$  = 8.0, 0.9 Hz, 1H), 7.38–7.46 (m, 2H), 7.49–7.57 (m, 2H), 8.01–8.08 (m, 2H), 8.23 (s, 1H); <sup>13</sup>C NMR (75.4 MHz, CDCl<sub>3</sub>):  $\delta$  (ppm) = 34.2 (CH<sub>3</sub>), 43.8 (CH), 107.0 (CH), 109.5 (CH), 111.5 (CH), 112.5 (C), 118.8 (CH), 119.8 (CH), 122.3 (CH), 122.9 (CH), 124.5 (CH), 126.5 (C), 128.7 (2  $\times$  CH), 128.8 (2  $\times$  CH), 129.7 (C), 133.1 (CH), 136.5 (C), 136.7 (C), 197.2 (C); LRMS (70 eV, EI):  $m/z$  (%) 314 (M<sup>+</sup>, 3), 209 (100); HRMS (EI<sup>+</sup>) calcd for C<sub>21</sub>H<sub>18</sub>N<sub>2</sub>O: 314.1419, found: 314.1417.

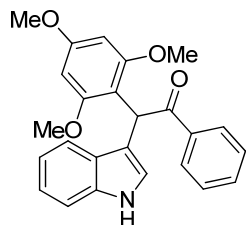

**2-(1H-Indol-3-yl)-1-phenyl-2-(2,4,6-trimethoxyphenyl)ethanone (7f):** White foam; yield = 51% (205 mg); <sup>1</sup>H NMR (300 MHz, CDCl<sub>3</sub>):  $\delta$  (ppm) = 3.71 (s, 6H), 3.74 (s, 3H), 6.05 (s, 2H), 6.27 (s, 1H), 6.95 (s, 1H), 7.05–7.18 (m, 2H), 7.24–7.33 (m, 3H), 7.36–7.43 (m, 1H), 7.64 (d,  $J$  = 7.8 Hz, 1H), 7.81–7.90 (m,

2H), 8.07 (s, 1H); <sup>13</sup>C NMR (75.4 MHz, CDCl<sub>3</sub>):  $\delta$  (ppm) = 41.7 (CH), 55.2 (CH<sub>3</sub>), 55.6 (2  $\times$  CH<sub>3</sub>), 91.0 (2  $\times$  CH), 111.0 (C), 111.3 (CH), 113.1 (C), 118.9 (CH), 119.2 (CH), 121.2 (CH), 124.3 (CH), 127.6 (C), 127.9 (2  $\times$  CH), 128.0 (2  $\times$  CH), 131.7 (CH), 136.1 (C), 137.6 (C), 158.0 (2  $\times$  C), 160.3 (C), 199.7 (C); LRMS (70 eV, EI):  $m/z$  (%) 401 (M<sup>+</sup>, 2), 296 (100); HRMS (EI<sup>+</sup>) calcd for C<sub>25</sub>H<sub>23</sub>NO<sub>4</sub>: 401.1627, found, 401.1622.

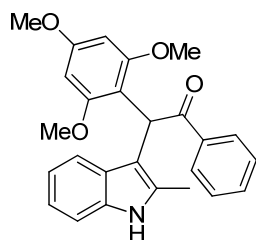

**2-(2-Methyl-1H-indol-3-yl)-1-phenyl-2-(2,4,6-trimethoxyphenyl)ethanone (7g):** White foam; yield = 38% (158 mg); <sup>1</sup>H NMR (300 MHz, CDCl<sub>3</sub>):  $\delta$  (ppm) = 2.24 (s, 3H), 3.65 (s, 6H), 3.74 (s, 3H), 6.07 (s, 2H), 6.21 (s, 1H), 6.98–7.04 (m, 2H), 7.12–7.20 (m, 1H), 7.24–7.34 (m, 2H), 7.35–7.42 (m, 1H), 7.52 (d,  $J$

= 7.5 Hz, 1H), 7.77 (s, 1H), 7.86–7.81 (m, 2H);  $^{13}\text{C}$  NMR (75.4 MHz,  $\text{CDCl}_3$ ): 12.6 ( $\text{CH}_3$ ), 42.3 (CH), 55.3 ( $\text{CH}_3$ ), 55.6 (2  $\times$   $\text{CH}_3$ ), 91.1 (2  $\times$  CH), 109.5 (C), 110.0 (C), 110.4 (CH), 119.1 (CH), 119.5 (CH), 128.08 (2  $\times$  CH), 128.12 (2  $\times$  CH), 129.1 (C), 131.8 (CH), 132.7 (C), 135.2 (C), 137.6 (C), 158.3 (2  $\times$  C), 160.3 (C), 198.7 (C); LRMS (70 eV, EI):  $m/z$  (%) 415 ( $\text{M}^+$ , 9), 310 (100); HRMS ( $\text{EI}^+$ ) calcd for  $\text{C}_{26}\text{H}_{25}\text{NO}_4$ : 415.1784, found, 415.1779.

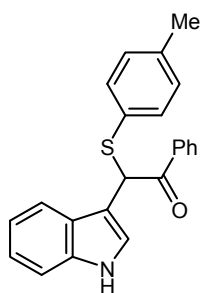

**2-(1H-Indol-3-yl)-1-phenyl-2-(p-tolylthio)ethanone (8a):** White solid; yield = 87% (311 mg); mp = 113–115 °C;  $^1\text{H}$  NMR (300 MHz,  $\text{CDCl}_3$ ):  $\delta$  (ppm) = 2.29 (s, 3H), 6.22 (s, 1H), 7.02 (d,  $J$  = 7.8 Hz, 2H), 7.10 (d,  $J$  = 2.5 Hz, 1H), 7.18–7.27 (m, 4H), 7.32–7.42 (m, 3H), 7.51 (at,  $J$  = 7.3 Hz, 1H), 7.82–7.86 (m, 1H), 8.02 (ad,  $J$  = 7.7 Hz, 2H), 8.39 (s, 1H);  $^{13}\text{C}$  NMR (75.4 MHz,  $\text{CDCl}_3$ ):  $\delta$  (ppm) = 21.2 ( $\text{CH}_3$ ),

51.4 (CH), 110.0 (C), 111.7 (CH), 119.0 (CH), 120.1 (CH), 122.5 (CH), 125.0 (CH), 126.0 (C), 128.6 (2  $\times$  CH), 128.8 (2  $\times$  CH), 129.6 (2  $\times$  CH), 130.4 (C), 133.2 (CH), 134.0 (2  $\times$  CH), 136.1 (C), 136.3 (C), 138.3 (C), 194.9 (C); LRMS (70 eV, EI):  $m/z$  (%) 357 ( $\text{M}^+$ , 4), 234 (100); HRMS ( $\text{EI}^+$ ) calcd for  $\text{C}_{23}\text{H}_{19}\text{NOS}$ : 357.1187, found: 357.1185.

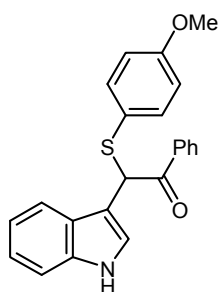

**2-(1H-Indol-3-yl)-2-((4-methoxyphenyl)thio)-1-phenylethanone (8b):** Brown solid; yield = 83% (310 mg);  $R_f$  = 0.25 (hexane/EtOAc, 6:1);  $^1\text{H}$  NMR (300 MHz,  $(\text{CD}_3)_2\text{CO}$ ):  $\delta$  (ppm) = 3.73 (s, 3H), 6.45 (s, 1H), 6.73–6.81 (m, 2H), 7.06–7.26 (m, 4H), 7.29 (d,  $J$  = 2.6 Hz, 1H), 7.37–7.56 (m, 4H), 7.90 (d,  $J$  = 7.6 Hz, 1H), 8.08–8.12 (m, 1H), 10.27 (s, 1H);  $^{13}\text{C}$  NMR (75.4 MHz,  $(\text{CD}_3)_2\text{CO}$ ):  $\delta$  (ppm) =

52.9 ( $\text{CH}_3$ ), 55.5 (CH), 110.4 (C), 112.4 (CH), 114.9 (2  $\times$  CH), 120.1 (CH), 120.2 (CH), 122.6 (CH), 125.3 (C), 126.4 (CH), 127.0 (C), 129.3 (2  $\times$  CH), 129.5 (2  $\times$  CH), 133.7 (CH), 137.0 (2  $\times$  CH), 137.1 (C), 137.5 (C), 160.8 (C), 195.1 (C); LRMS (70 eV, EI):  $m/z$  (%) 373 ( $\text{M}^+$ , 3), 234 (100); HRMS ( $\text{EI}^+$ ) calcd for  $\text{C}_{23}\text{H}_{19}\text{NO}_2\text{S}$ : 373.1136, found: 373.1136.

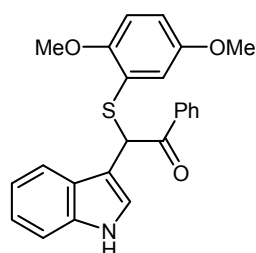

**2-((2,5-Dimethoxyphenyl)thio)-2-(1H-indol-3-yl)-1-phenylethanone (8c):** White foam; yield = 76% (307 mg);  $R_f$  = 0.25 (hexane/EtOAc, 4:1);  $^1\text{H}$  NMR (300 MHz,  $\text{CDCl}_3$ ):  $\delta$  (ppm) = 3.52 (s, 3H), 3.67 (s, 3H), 6.47 (s, 1H), 6.71–6.74 (m, 2H), 6.82 (t,  $J$  = 1.7 Hz, 1H), 7.11 (d,  $J$  = 2.5 Hz, 1H),

7.14–7.21 (m, 2H), 7.26–7.39 (m, 3H), 7.43–7.50 (m, 1H), 7.79–7.85 (m, 1H), 7.96–8.01 (m, 2H), 8.61 (s, 1H); <sup>13</sup>C NMR (75.4 MHz, CDCl<sub>3</sub>): δ (ppm) = 49.2 (CH), 55.6 (CH<sub>3</sub>), 56.2 (CH<sub>3</sub>), 109.9 (C), 111.7 (CH), 111.8 (CH), 114.6 (CH), 118.9 (CH), 119.1 (CH), 120.0 (CH), 122.4 (CH), 123.6 (C), 124.7 (CH), 126.1 (C), 128.5 (2 × CH), 128.7 (2 × CH), 133.1 (CH), 136.1 (C), 136.4 (C), 153.1 (C), 153.3(C), 195.5 (C); LRMS (70 eV, EI): *m/z* (%) 387 [(M–O)<sup>+</sup>, 25], 282 (100); HRMS (EI<sup>+</sup>) calcd for C<sub>24</sub>H<sub>21</sub>NO<sub>2</sub>S (M–O)<sup>+</sup>: 387.1293, found: 387.1295.

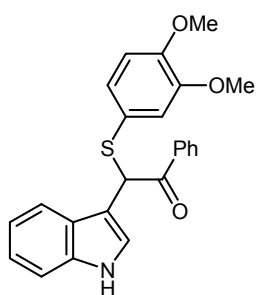

**2-((3,4-Dimethoxyphenyl)thio)-2-(1H-indol-3-yl)-1-phenylethanone (8d):**

Orange oil; yield = 75% (303 mg); *R<sub>f</sub>* = 0.34 (hexane/EtOAc, 5:1); <sup>1</sup>H NMR (300 MHz, CDCl<sub>3</sub>): δ (ppm) = 3.48 (s, 3H), 3.81 (s, 3H), 6.14 (s, 1H), 6.54 (d, *J* = 1.8 Hz, 1H), 6.70 (d, *J* = 8.3 Hz, 1H), 6.94 (dd, *J* = 8.3, 2.0 Hz, 1H), 7.09 (d, *J* = 2.5 Hz, 1H), 7.17–7.28 (m, 2H), 7.31–7.44 (m, 3H), 7.51 (at, *J* = 7.3

Hz, 1H), 7.78–7.83 (m, 1H), 8.00 (d, *J* = 7.6 Hz, 2H), 8.43 (s, 1H); <sup>13</sup>C NMR (75.4 MHz, CDCl<sub>3</sub>): δ (ppm) = 51.3 (CH<sub>3</sub>), 55.6 (CH<sub>3</sub>), 55.9 (CH<sub>3</sub>), 109.9 (C), 111.1 (CH), 111.5 (CH), 118.3 (CH), 119.1 (CH), 120.1 (CH), 122.6 (CH), 124.2 (C), 125.2 (CH), 126.2 (C), 128.4 (CH), 128.7 (2 × CH), 128.8 (2 × CH), 133.2 (CH), 136.1 (C), 136.2 (C), 148.3 (C), 149.6 (C), 194.9 (C); LRMS (70 eV, EI): *m/z* (%) 387 [(M–O)<sup>+</sup>, 19], 282 (100); HRMS (EI<sup>+</sup>) calcd for C<sub>24</sub>H<sub>21</sub>NO<sub>2</sub>S (M–O)<sup>+</sup>: 387.1293, found: 387.1294.

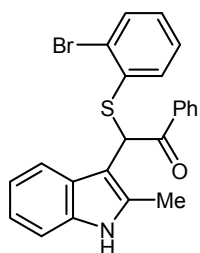

**2-((2-Bromophenyl)thio)-2-(2-methyl-1H-indol-3-yl)-1-phenylethanone (8e):**

Black solid; yield = 78% (340 mg); mp = 99–101 °C; <sup>1</sup>H NMR (300 MHz, CDCl<sub>3</sub>): δ (ppm) = 2.21 (s, 3H), 6.38 (s, 1H), 6.95–7.05 (m, 2H), 7.06–7.13 (m, 3H), 7.16–7.21 (m, 1H), 7.31 (at, *J* = 7.5 Hz, 2H), 7.43 (dd, *J* = 8.3, 6.4 Hz, 1H), 7.56 (dd, *J* = 7.6, 1.6 Hz, 1H), 7.71 (dd, *J* = 5.9, 3.2 Hz, 1H), 7.86 (s, 1H), 7.90–7.94

(m, 2H); <sup>13</sup>C NMR (75.4 MHz, CDCl<sub>3</sub>): δ (ppm) = 12.0 (CH<sub>3</sub>), 52.8 (CH), 105.7 (C), 110.5 (CH), 119.0 (CH), 120.3 (CH), 121.7 (CH), 127.1 (C), 127.6 (CH), 128.66 (2 × CH), 128.70 (2 × CH), 128.9 (C), 129.2 (CH), 133.0 (CH), 133.2 (CH), 134.1 (C), 135.3 (C), 135.6 (C), 135.7 (CH), 135.9 (C), 194.4 (C); LRMS (70 eV, EI): *m/z* (%) 435 [(M+2)<sup>+</sup>, 3], 437 (M<sup>+</sup>, 3), 248 (100); HRMS (EI<sup>+</sup>) calcd for C<sub>23</sub>H<sub>18</sub>BrNOS: 435.0292, found: 435.0291.

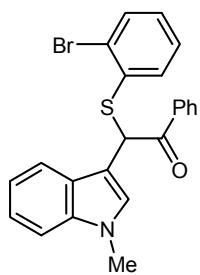

**2-((2-Bromophenyl)thio)-2-(1-methyl-1*H*-indol-3-yl)-1-phenylethanone (8f):**

Orange solid; yield = 86% (375 mg); mp = 129–131 °C; <sup>1</sup>H NMR (300 MHz, CDCl<sub>3</sub>): δ (ppm) = 3.67 (s, 3H), 6.51 (s, 1H), 7.00–7.09 (m, 2H), 7.10 (s, 1H), 7.21 (ddd, *J* = 7.8, 6.6, 3.8 Hz, 1H), 7.26–7.31 (m, 3H), 7.37 (at, *J* = 7.8 Hz, 2H), 7.49 (at, *J* = 7.4 Hz, 1H), 7.55–7.59 (m, 1H), 7.80–7.86 (m, 1H), 7.98–8.04 (m, 2H);

<sup>13</sup>C NMR (75.4 MHz, CDCl<sub>3</sub>): δ (ppm) = 33.0 (CH<sub>3</sub>), 50.1 (CH), 107.7 (C), 109.7 (CH), 119.1 (CH), 120.0 (CH), 122.3 (CH), 126.6 (C), 126.8 (C), 127.8 (CH), 128.6 (CH), 128.7 (2 × CH), 128.8 (2 × CH), 129.3 (CH), 133.1 (CH), 133.3 (CH), 135.9 (C), 136.2 (C), 137.2 (C), 194.4 (C), one aromatic carbon peak was missing due to overlapping; LRMS (70 eV, EI): *m/z* (%) 435 [(*M*+2)<sup>+</sup>, 1], 437 (*M*<sup>+</sup>, 1), 248 (100); HRMS (EI<sup>+</sup>) calcd for C<sub>23</sub>H<sub>18</sub>BrNOS: 435.0292, found: 435.0293.

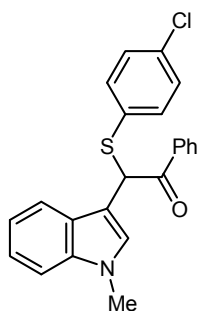

**2-((4-Chlorophenyl)thio)-2-(1-methyl-1*H*-indol-3-yl)-1-phenylethanone (8g):**

White solid; yield = 89% (349 mg); mp = 114–116 °C; <sup>1</sup>H NMR (300 MHz, CDCl<sub>3</sub>): δ (ppm) = 3.67 (s, 3H), 6.25 (s, 1H), 7.04 (s, 1H), 7.14–7.28 (m, 5H), 7.28–7.34 (m, 2H), 7.36–7.44 (m, 2H), 7.48–7.55 (m, 1H), 7.77–7.83 (m, 1H), 7.98–8.03 (m, 2H); <sup>13</sup>C NMR (75.4 MHz, CDCl<sub>3</sub>): δ (ppm) = 32.9 (CH<sub>3</sub>), 51.1 (CH), 108.0 (C), 109.7 (CH), 119.0 (CH), 119.9 (CH), 122.3 (CH), 126.4 (C), 128.7 (2 × CH),

128.8 (2 × CH), 128.9 (2 × CH), 129.4 (CH), 132.7 (C), 133.3 (CH), 134.2 (C), 135.0 (2 × CH), 135.9 (C), 137.1 (C), 194.3 (C); LRMS (70 eV, EI): *m/z* (%) 393 [(*M*+2)<sup>+</sup>, 1], 391 (*M*<sup>+</sup>, 3), 248 (100); HRMS (EI<sup>+</sup>) calcd for C<sub>23</sub>H<sub>18</sub>ClNOS: 391.0798, found: 391.0799.

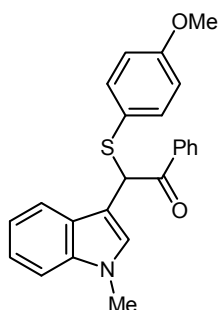

**2-((4-Methoxyphenyl)thio)-2-(1-methyl-1*H*-indol-3-yl)-1-phenylethanone (8h):**

Yellow solid; yield = 87% (337 mg); mp = 145–147 °C; <sup>1</sup>H NMR (300 MHz, CDCl<sub>3</sub>): δ (ppm) = 3.67 (s, 3H), 3.76 (s, 3H), 6.17 (s, 1H), 6.72–6.78 (m, 2H), 7.06 (s, 1H), 7.20–7.27 (m, 3H), 7.28–7.33 (m, 2H), 7.40 (at, *J* = 7.7 Hz, 2H), 7.51 (at, *J* = 7.0 Hz, 1H), 7.80–7.84 (m, 1H), 8.02 (d, *J* = 7.6 Hz, 2H); <sup>13</sup>C

NMR (75.4 MHz, CDCl<sub>3</sub>): δ (ppm) = 32.8 (CH<sub>3</sub>), 51.3 (CH), 55.3 (CH<sub>3</sub>), 108.4 (C), 109.5 (CH), 114.2 (2 × CH), 119.0 (CH), 119.7 (CH), 122.1 (CH), 124.2 (C), 126.6 (CH), 128.6 (2 × CH), 128.7 (2 × CH), 129.4 (C), 133.0 (CH), 136.2 (C), 136.8 (2 × CH), 136.9 (C), 160.1 (C), 194.6 (C); LRMS

(70 eV, EI):  $m/z$  (%) 387 ( $M^+$ , 1), 139 (100); HRMS ( $EI^+$ ) calcd for  $C_{17}H_{16}NOS$ : ( $M-C_7H_5O$ ) $^+$ , 282.0953, found: 282.0951.

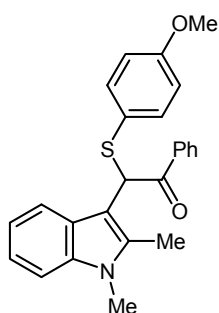

**2-(1,2-Dimethyl-1H-indol-3-yl)-2-((4-methoxyphenyl)thio)-1-phenylethanone**

**(8i)**: White solid; yield = 75% (301 mg); mp = 213–215 °C;  $^1H$  NMR (300 MHz,  $CDCl_3$ ):  $\delta$  (ppm) = 2.11 (s, 3H), 3.54 (s, 3H), 3.75 (s, 3H), 6.03 (s, 1H), 6.68–6.74 (m, 2H), 7.08–7.17 (m, 2H), 7.18–7.23 (m, 3H), 7.25–7.31 (m, 2H), 7.37–7.43 (m, 1H), 7.69–7.74 (m, 1H), 7.85–7.90 (m, 2H);  $^{13}C$  NMR (75.4 MHz,  $CDCl_3$ ):  $\delta$  (ppm) = 10.2 ( $CH_3$ ), 29.6 ( $CH_3$ ), 55.3 ( $CH_3$ ), 56.1 (CH), 105.7 (C),

108.8 (CH), 114.1 (2  $\times$  CH), 119.1 (CH), 119.7 (CH), 121.1 (CH), 125.2 (C), 126.0 (C), 128.4 (2  $\times$  CH), 128.5 (2  $\times$  CH), 132.9 (CH), 135.5 (C), 136.1 (C), 136.8 (2  $\times$  CH), 159.9 (C), 195.2 (C), one aromatic carbon peak was missing due to overlapping; LRMS (70 eV, EI):  $m/z$  (%) 401 ( $M^+$ , 1), 262 (100); HRMS ( $EI^+$ ) calcd for  $C_{18}H_{18}NOS$  ( $M-C_7H_5O$ ) $^+$ : 296.1109, found: 296.1108.

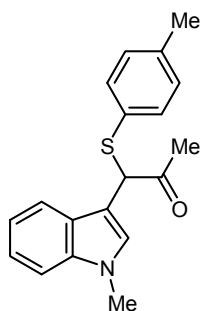

**1-(1-Methyl-1H-indol-3-yl)-1-(p-tolylthio)propan-2-one (8j)**: Yellow foam; yield = 73% (225 mg);  $R_f$  = 0.30 (hexane/EtOAc, 5:1);  $^1H$  NMR (300 MHz,  $CDCl_3$ ):  $\delta$  (ppm) = 2.28 (s, 3H), 2.35 (s, 3H), 3.74 (s, 3H), 5.29 (s, 1H), 7.10 (s, 1H), 7.12–7.15 (m, 2H), 7.21 (ddd,  $J$  = 8.0, 6.5, 1.6 Hz, 1H), 7.27–7.37 (m, 4H), 7.71–7.75 (m, 1H);  $^{13}C$  NMR (75.4 MHz,  $CDCl_3$ ):  $\delta$  (ppm) = 21.1 ( $CH_3$ ), 26.8

( $CH_3$ ), 32.8 ( $CH_3$ ), 56.0 (CH), 107.9 (C), 109.5 (CH), 119.1 (CH), 119.7 (CH), 122.2 (CH), 126.6 (C), 128.4 (CH), 129.7 (2  $\times$  CH), 130.2 (C), 133.0 (2  $\times$  CH), 137.0 (C), 138.0 (C), 203.3 (C); LRMS (70 eV, EI):  $m/z$  (%) 309 ( $M^+$ , 2), 186 (100); HRMS ( $EI^+$ ) calcd for  $C_{19}H_{19}NOS$ : 309.1187, found: 309.1187.

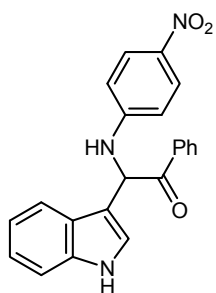

**2-(1H-Indol-3-yl)-2-((4-nitrophenyl)amino)-1-phenylethanone (9a)**: Yellow

foam; yield = 65% (241 mg);  $R_f$  = 0.25 (hexane/EtOAc, 2:1);  $^1H$  NMR (300 MHz,  $CDCl_3$ ):  $\delta$  (ppm) = 6.05 (d,  $J$  = 6.3 Hz, 1H), 6.40 (d,  $J$  = 6.3 Hz, 1H), 6.56–6.67 (m, 2H), 7.15–7.28 (m, 3H), 7.31–7.44 (m, 3H), 7.47–7.56 (m, 1H), 7.73–7.81 (m, 1H), 7.95–8.09 (m, 4H), 8.44 (s, 1H);  $^{13}C$  NMR (75.4 MHz,  $CDCl_3$ ):  $\delta$  (ppm) =

55.1 (CH), 111.0 (CH), 111.96 (CH), 112.03 (CH), 113.5 (C), 118.8 (CH), 120.9 (CH), 123.1 (CH), 124.7 (CH), 125.4 (C), 126.4 (CH), 126.5 (CH), 128.8 (2 × CH), 128.9 (2 × CH), 133.9 (CH), 134.5 (C), 136.5 (C), 138.4 (C), 151.8 (C), 195.3 (C); LRMS (70 eV, EI):  $m/z$  (%) 266 [(M-C<sub>7</sub>H<sub>5</sub>O)<sup>+</sup>, 100]; HRMS (EI<sup>+</sup>) calcd for C<sub>15</sub>H<sub>12</sub>N<sub>3</sub>O<sub>2</sub> (M-C<sub>7</sub>H<sub>5</sub>O)<sup>+</sup>: 266.0930, found: 266.0930.

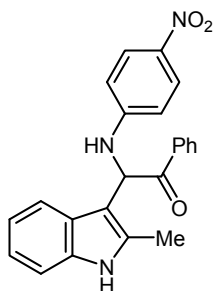

**2-(2-Methyl-1H-indol-3-yl)-2-((4-nitrophenyl)amino)-1-phenylethanone (9b):**

Yellow solid; yield = 88% (339 mg); mp = 95–97 °C; <sup>1</sup>H NMR (300 MHz, CDCl<sub>3</sub>):

$\delta$  (ppm) = 2.46 (s, 3H), 6.21–6.33 (m, 2H), 6.56 (d,  $J$  = 9.1 Hz, 2H), 7.09–7.26 (m, 3H), 7.35 (at,  $J$  = 7.4 Hz, 2H), 7.47 (at,  $J$  = 7.3 Hz, 1H), 7.74 (d,  $J$  = 7.5 Hz, 1H), 7.92–8.01 (m, 4H), 8.18 (s, 1H); <sup>13</sup>C NMR (75.4 MHz, CDCl<sub>3</sub>):  $\delta$  (ppm) =

12.5 (CH<sub>3</sub>), 54.9 (CH), 105.7 (C), 111.1 (CH), 112.0 (2 × CH), 117.7 (CH), 120.6 (CH), 121.9 (CH), 126.4 (2 × CH), 126.7 (C), 128.4 (2 × CH), 128.7 (2 × CH), 133.7 (CH), 134.1 (C), 134.8 (C), 135.3 (C), 138.1 (C), 151.7 (C), 194.6 (C); LRMS (70 eV, EI):  $m/z$  (%) 280 [(M-C<sub>7</sub>H<sub>5</sub>O)<sup>+</sup>, 100]; HRMS (EI<sup>+</sup>) calcd for C<sub>16</sub>H<sub>14</sub>N<sub>3</sub>O<sub>2</sub> (M-C<sub>7</sub>H<sub>5</sub>O)<sup>+</sup>: 280.1086, found: 280.1081.

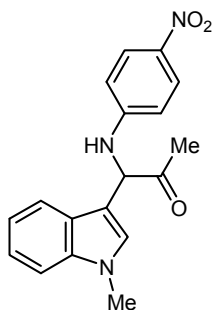

**1-(1-Methyl-1H-indol-3-yl)-1-((4-nitrophenyl)amino)propan-2-one (9c):**

Slightly contaminated with *p*-nitroaniline. Yellow foam; yield = 67% (217 mg);  $R_f$

= 0.25 (hexane/EtOAc, 4:1); <sup>1</sup>H NMR (300 MHz, CDCl<sub>3</sub>):  $\delta$  (ppm) = 2.20 (s, 3H), 3.78 (s, 3H), 5.40 (d,  $J$  = 4.5 Hz, 1H), 6.22 (d,  $J$  = 4.5 Hz, 1H), 6.49–6.56 (m, 2H), 7.13 (s, 1H), 7.17–7.38 (m, 3H), 7.67 (dt,  $J$  = 7.9, 1.1 Hz, 1H), 7.94–7.98 (m, 2H); <sup>13</sup>C NMR (75.4 MHz, CDCl<sub>3</sub>):  $\delta$  (ppm) = 26.7 (CH<sub>3</sub>), 33.2 (CH<sub>3</sub>), 59.5

(CH), 109.0 (C), 110.2 (CH), 112.1 (2 × CH), 118.7 (CH), 120.4 (CH), 122.7 (CH), 126.1 (C), 126.3 (2 × CH), 128.4 (CH), 137.5 (C), 138.4 (C), 151.4 (C), 203.1 (C); LRMS (70 eV, EI):  $m/z$  (%) 323 (M<sup>+</sup>, 5), 280 (100); HRMS (EI<sup>+</sup>) calcd for C<sub>18</sub>H<sub>17</sub>N<sub>3</sub>O<sub>3</sub>: 323.1270, found: 323.1271.

### General procedure for the synthesis of tryptophol derivatives 10:

To a stirred solution of the corresponding  $\alpha$ -(indol-3-yl) carbonyl compound derivative **7-9** (0.5 mmol) in MeOH (5 mL), NaBH<sub>4</sub> (0.6 mmol) was added portionwise at 0 °C. After 1 h at room temperature the crude mixture was quenched with a saturated solution of NH<sub>4</sub>Cl (5 mL) and

extracted with DCM (3 × 10 mL). The combined organic layers were dried over anhydrous Na<sub>2</sub>SO<sub>4</sub> and concentrated at reduced pressure. The residue was purified by flash chromatography using mixtures of hexane and EtOAc as eluents to obtain the corresponding tryptophol derivatives **10** in the yields reported in Scheme 5.

### Spectroscopic and characterization data for compounds **10**

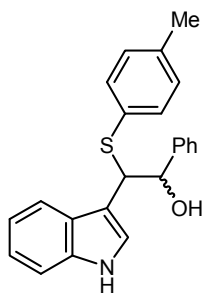

**2-(1*H*-Indol-3-yl)-1-phenyl-2-(*p*-tolylthio)ethanol (10a):** Generated and isolated as a ca. 2:1 mixture of diastereoisomers. Yellow solid; yield = 78% (140 mg); mp = 151–153 °C; <sup>1</sup>H NMR (300 MHz, CDCl<sub>3</sub>): δ (ppm) = 2.29 (s, 3H, one diast), 2.32 (s, 3H, one diast), 3.02 (bs, 1H, one diast), 3.64 (bs, 1H, one diast), 4.71 (d, *J* = 8.3 Hz, 1H, one diast), 4.84 (d, *J* = 4.8 Hz, 1H, one diast), 5.08 (d, *J*

= 8.4 Hz, 1H, one diast), 5.12 (d, *J* = 4.8 Hz, 1H, one diast), 6.63 (d, *J* = 2.4 Hz, 1H, one diast), 6.99 (d, *J* = 8.3 Hz, 1H, one diast), 7.06–7.12 (m, 7H), 7.13–7.23 (m, 10H), 7.23–7.29 (m, 3H), 7.31 (d, *J* = 8.0 Hz, 2H), 7.55 (d, *J* = 7.9 Hz, 1H, one diast), 7.69 (d, *J* = 7.6 Hz, 1H, one diast), 7.87 (s, 1H, one diast), 8.07 (s, 1H, one diast); <sup>13</sup>C NMR (75.4 MHz, CDCl<sub>3</sub>): δ (ppm) = 21.2 (CH<sub>3</sub>), 21.3 (CH<sub>3</sub>), 54.2 (CH), 56.4 (CH), 74.4 (CH), 75.1 (CH), 111.29 (CH), 111.32 (CH), 111.4 (C), 113.63 (C), 119.3 (CH), 119.5 (CH), 119.76 (CH), 119.79 (CH), 122.3 (CH), 123.5 (CH), 124.5 (CH), 126.3 (C), 126.6 (2 × CH), 126.9 (C), 127.0 (CH), 127.6 (CH), 127.7 (CH), 128.0 (2 × CH), 128.1 (2 × CH), 129.6 (2 × CH), 129.9 (2 × CH), 131.2 (C), 133.1 (2 × CH), 133.7 (2 × CH), 136.0 (C), 136.1 (C), 137.79 (C), 137.82 (C), 140.9 (C), 141.2 (C); LRMS (70 eV, EI): *m/z* (%) 252 [(M–C<sub>7</sub>H<sub>7</sub>O)<sup>+</sup>, 100]; HRMS (EI<sup>+</sup>) calcd for C<sub>16</sub>H<sub>14</sub>NS (M–C<sub>7</sub>H<sub>7</sub>O)<sup>+</sup>: 252.0847, found: 252.0847.

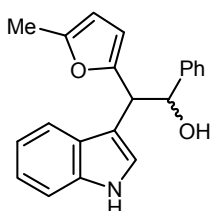

**2-(2-Methyl-1*H*-indol-3-yl)-2-(5-methylfuran-2-yl)-1-phenylethanol (10b):**

Generated as ca. 4:1 mixture of diastereoisomers. The major one could be isolated and characterized. Yellow solid; yield = 80% (132 mg); mp = 165–167 °C; <sup>1</sup>H NMR (300 MHz, CDCl<sub>3</sub>): δ (ppm) = 2.13 (s, 3H), 2.19 (s, 3H), 2.32 (bs, 1H), 4.40 (d, *J* = 7.2 Hz, 1H), 5.60 (d, *J* = 7.2 Hz, 1H), 5.80 (dd, *J* = 3.0, 1.0 Hz, 1H), 5.96 (d, *J* = 2.9 Hz, 1H), 7.07–7.28 (m, 8H), 7.74 (d, *J* = 7.6 Hz, 1H), 7.91 (s, 1H); <sup>13</sup>C NMR (75.4 MHz, CDCl<sub>3</sub>): δ (ppm) = 11.9 (CH<sub>3</sub>), 13.7 (CH<sub>3</sub>), 46.3 (CH), 75.2 (CH), 106.0 (CH), 107.3 (C), 107.8 (CH), 110.5



(CH), 119.6 (CH), 120.1 (CH), 121.3 (CH), 126.6 (2 × CH), 127.5 (CH), 127.9 (C), 128.1 (2 × CH), 134.0 (C), 135.5 (C), 142.9 (C), 150.5 (C), 152.8 (C); LRMS (70 eV, EI):  $m/z$  (%) 224 [(M-C<sub>7</sub>H<sub>7</sub>O)<sup>+</sup>, 100]; HRMS (EI<sup>+</sup>) calcd for C<sub>15</sub>H<sub>14</sub>NO (M-C<sub>7</sub>H<sub>7</sub>O)<sup>+</sup>: 224.1075, found: 224.1072.

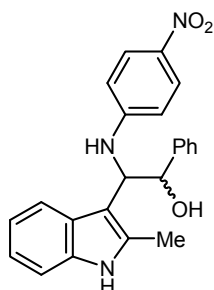

**2-(2-Methyl-1H-indol-3-yl)-2-((4-nitrophenyl)amino)-1-phenylethanol (10c):**

Generated as ca. 2:1 mixture of diastereoisomers. The major one could be isolated and characterized. Yellow solid; yield = 81% (157 mg); mp = 184–186 °C; <sup>1</sup>H NMR (300 MHz, CDCl<sub>3</sub>):  $\delta$  (ppm) = 1.90 (s, 3H), 2.35 (d,  $J$  = 5.4 Hz, 1H), 4.85 (dd,  $J$  = 6.1, 4.7 Hz, 1H), 5.28 (at,  $J$  = 4.7 Hz, 1H), 5.51 (d,  $J$  = 6.1 Hz, 1H),

6.42 (ad,  $J$  = 9.2 Hz, 2H), 6.98–7.17 (m, 4H), 7.22–7.35 (m, 4H), 7.62 (d,  $J$  = 7.7 Hz, 1H), 7.87–7.96 (m, 3H); <sup>13</sup>C NMR (75.4 MHz, CDCl<sub>3</sub>):  $\delta$  (ppm) = 11.8 (CH<sub>3</sub>), 57.7 (CH), 77.3 (CH), 105.8 (C), 110.8 (CH), 111.8 (2 × CH), 119.0 (CH), 120.1 (CH), 121.6 (CH), 126.2 (2 × CH), 126.5 (2 × CH), 127.4 (C), 128.3 (CH), 128.5 (2 × CH), 134.2 (C), 135.4 (C), 138.1 (C), 140.2 (C), 152.6 (C); LRMS (70 eV, EI):  $m/z$  (%) 280 [(M-C<sub>7</sub>H<sub>7</sub>O)<sup>+</sup>, 100]; HRMS (EI<sup>+</sup>) calcd for C<sub>16</sub>H<sub>14</sub>N<sub>3</sub>O<sub>2</sub> (M-C<sub>7</sub>H<sub>7</sub>O)<sup>+</sup>: 280.1086, found: 280.1088.

**General procedure for the synthesis of tricarbonyl compounds 11:**

Cu(OTf)<sub>2</sub> (10 mol%, 36 mg) was added to a solution of the corresponding  $\alpha$ -acyloin **3** (1 mmol) and the corresponding 1,3-dicarbonyl compound (1 mmol) in toluene (4 mL) at room temperature. The resulting mixture was stirred until the alcohol was consumed as determined by TLC. The crude reaction mixture was quenched with aqueous NaOH (0.5M) and extracted with EtOAc (3 × 10 mL), and the combined organic layers were dried over anhydrous Na<sub>2</sub>SO<sub>4</sub> and concentrated at reduced pressure. The residue was purified by flash chromatography on deactivated silica gel using mixtures of hexane and EtOAc as eluents to obtain the corresponding tricarbonyl compounds **11** in the yields reported in Table 3.

**Spectroscopic and characterization data for compounds 11:**

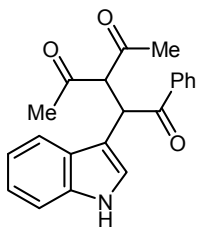

**3-Acetyl-2-(1*H*-indol-3-yl)-1-phenylpentane-1,4-dione (11a):** Yellow solid; yield = 90% (300 mg); mp = 159–161 °C; <sup>1</sup>H NMR (400 MHz, CDCl<sub>3</sub>): δ (ppm) = 1.88 (s, 3H), 2.29 (s, 3H), 5.04 (d, *J* = 11.1 Hz, 1H), 5.67 (d, *J* = 11.1 Hz, 1H), 7.04 (d, *J* = 2.6 Hz, 1H), 7.12–7.19 (m, 2H), 7.24–7.32 (m, 3H), 7.39 (at, *J* = 7.4 Hz, 1H),

7.71–7.75 (m, 1H), 7.93–7.96 (m, 2H), 8.28 (s, 1H); <sup>13</sup>C NMR (100.6 MHz, CDCl<sub>3</sub>): δ (ppm) = 30.4 (CH<sub>3</sub>), 31.6 (CH<sub>3</sub>), 45.5 (CH), 70.3 (CH), 109.3 (C), 111.7 (CH), 119.0 (CH), 120.5 (CH), 122.7 (CH), 124.2 (C), 125.8 (C), 128.5 (2 × CH), 128.8 (2 × CH), 133.1 (CH), 135.9 (CH), 136.5 (C), 197.8 (C), 202.3 (C), 204.0 (C); LRMS (70 eV, EI): *m/z* (%) 333 (M<sup>+</sup>, 6), 186 (100); HRMS (EI<sup>+</sup>) calcd for C<sub>21</sub>H<sub>19</sub>NO<sub>3</sub>: 333.1365, found: 333.1360.

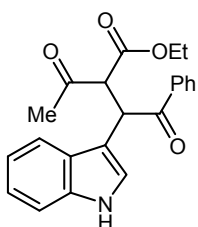

**Ethyl 2-acetyl-3-(1*H*-indol-3-yl)-4-oxo-4-phenylbutanoate (11b):** Isolated as a ca. 1.1:1 mixture of diastereoisomers. Yellow foam; yield = 68% (247 mg); R<sub>f</sub> = 0.25 (hexane/EtOAc, 2:1); <sup>1</sup>H NMR (300 MHz, CDCl<sub>3</sub>): δ (ppm) = 0.92 (t, *J* = 7.1 Hz, 3H, one diast), 1.23 (t, *J* = 7.1 Hz, 3H), 1.93 (s, 3H, one diast), 2.41 (s, 3H,

one diast), 3.88 (m, 2H, one diast), 4.19 (q, *J* = 7.1 Hz, one diast), 4.79 (d, *J* = 11.1 Hz, 1H, one diast), 4.91 (d, *J* = 11.2 Hz, 1H, one diast), 5.66–5.79 (m, 1H, both diast), 7.01 (s, 1H, one diast), 7.03–7.06 (m, 2H, both diast), 7.16–7.21 (m, 4H, both diast), 7.28–7.35 (m, 6H, both diast), 7.39–7.46 (m, 2H, both diast), 7.78–7.85 (m, 2H), 7.98–8.06 (m, 4H), 8.50–8.58 (m, 2H); <sup>13</sup>C NMR (75.4 MHz, CDCl<sub>3</sub>): δ (ppm) = 13.6 (CH<sub>3</sub>), 14.0 (CH<sub>3</sub>), 29.7 (CH<sub>2</sub>), 32.1 (CH<sub>2</sub>), 44.3 (CH), 44.6 (CH), 61.3 (CH), 61.6 (CH<sub>2</sub>), 61.8 (CH<sub>2</sub>), 63.7 (CH), 108.9 (C), 109.5 (C), 111.5 (CH), 111.6 (CH), 119.1 (CH), 119.2 (CH), 120.1 (CH), 120.4 (CH), 122.4 (CH), 122.6 (CH), 124.1 (CH), 124.4 (CH), 125.8 (C), 126.1 (C), 128.47 (2 × CH), 128.50 (2 × CH), 128.8 (4 × CH), 133.0 (2 × CH), 135.9 (C), 136.37 (C), 136.42 (C), 168.2 (C), 168.6 (C), 197.8 (C), 197.9 (C), 202.1 (C), 203.9 (C), one aromatic carbon peak was missing due to overlapping; LRMS (70 eV, EI): *m/z* (%) 363 (M<sup>+</sup>, 10), 170 (100); HRMS (EI<sup>+</sup>) calcd for C<sub>22</sub>H<sub>21</sub>NO<sub>4</sub>: 363.1471, found: 363.1470.

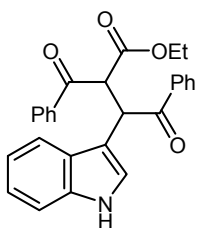

**Ethyl 2-benzoyl-3-(1*H*-indol-3-yl)-4-oxo-4-phenylbutanoate (11c):** Isolated as a ca. 1:1 mixture of diastereoisomers. White solid; yield = 80% (340 mg); mp = 149–151 °C; <sup>1</sup>H NMR (300 MHz, CDCl<sub>3</sub>): δ (ppm) = 0.76 (t, *J* = 7.1 Hz, 3H, one diast), 1.12 (t, *J* = 7.1 Hz, 3H, one diast), 3.67–3.80 (m, 2H, one diast), 4.13 (q, *J*

= 7.1 Hz, 2H, one diast), 5.48 (d,  $J$  = 8.8 Hz, 1H, one diast), 5.69 (d,  $J$  = 9.1 Hz, 1H, one diast), 5.92 (d,  $J$  = 11.0 Hz, 1H, one diast), 5.99 (d,  $J$  = 10.9 Hz, 1H, one diast), 6.95 (s, 1H, one diast), 7.07–7.10 (m, 3H), 7.16–7.20 (m, 3H), 7.26–7.33 (m, 5H), 7.38–7.45 (m, 2H), 7.48 (d,  $J$  = 7.7 Hz, 1H), 7.58 (at,  $J$  = 7.3 Hz, 2H), 7.71 (d,  $J$  = 7.3 Hz, 2H), 7.83 (t,  $J$  = 7.1 Hz, 2H), 8.01–8.05 (m, 4H), 8.14 (d,  $J$  = 7.5 Hz, 2H), 8.45 (s, 1H);  $^{13}\text{C}$  NMR (75.4 MHz,  $\text{CDCl}_3$ ):  $\delta$  (ppm) = 13.6 ( $\text{CH}_3$ ), 14.0 ( $\text{CH}_3$ ), 44.9 (CH), 45.4 (CH), 56.2 (CH), 59.1 (CH), 61.6 ( $\text{CH}_2$ ), 61.8 ( $\text{CH}_2$ ), 109.4 (C), 109.7 (C), 111.2 (CH), 111.5 (CH), 119.1 (CH), 119.4 (CH), 120.2 (CH), 120.3 (CH), 122.3 (CH), 122.5 (CH), 124.2 (CH), 126.0 (C), 126.3 (C), 128.2 (CH), 128.5 (2  $\times$  CH), 128.7 (CH), 128.8 (CH), 128.9 (2  $\times$  CH), 129.0 (2  $\times$  CH), 133.0 (2  $\times$  CH), 133.2 (CH), 133.8 (CH), 136.0 (C), 136.04 (C), 136.1 (C), 136.2 (C), 136.5 (C), 136.9 (C), 168.7 (C), 168.9 (C), 193.9 (C), 196.0 (C), 197.7 (C), 198.2 (C); LRMS (70 eV, EI):  $m/z$  (%) 425 ( $\text{M}^+$ , 13), 105 (100); HRMS ( $\text{EI}^+$ ) calcd for  $\text{C}_{27}\text{H}_{23}\text{NO}_4$ : 425.1627, found: 425.1626.

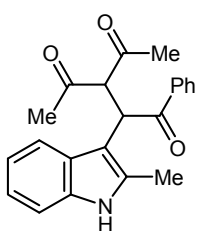

**3-Acetyl-2-(2-methyl-1H-indol-3-yl)-1-phenylpentane-1,4-dione (11d):** White

solid; yield = 93% (323 mg); mp = 143–145 °C;  $^1\text{H}$  and  $^{13}\text{C}$  NMR were consistent with the formation of rotamers;  $^1\text{H}$  NMR (400 MHz,  $(\text{CD}_3)_2\text{SO}$ ):  $\delta$  (ppm) = 1.77 (s, 3H), 2.24 (s, 3H), 2.35 (bs, 3H), 5.13 (bs, 1H), 5.42 (bs, 1H), 6.89–6.96 (m, 2H), 7.08–7.23 (m, 1H), 7.34–7.47 (m, 4H), 7.85 (d,  $J$  = 7.5 Hz, 2H), 10.97 (s, 1H);  $^{13}\text{C}$

NMR (100.6 MHz,  $(\text{CD}_3)_2\text{SO}$ ):  $\delta$  (ppm) = 11.1 ( $\text{CH}_3$ ), 29.7 ( $\text{CH}_3$ ), 31.0 (bs,  $\text{CH}_3$ ), 44.1 (bs, CH), 66.0 (bs, CH), 102.1 (CH), 110.4 (CH), 117.4 (bs, C), 118.7 (CH), 120.1 (CH), 126.0 (bs, C), 127.6 (2  $\times$  CH), 127.8 (C), 128.2 (2  $\times$  CH), 128.5 (C), 132.5 (CH), 133.5 (bs, C), 134.9 (bs, C), 135.3 (C), 135.4 (CH), 201.6 (C), 203.3 (C), one aromatic carbon peak was missing due to overlapping; LRMS (70 eV, EI):  $m/z$  (%) 347 ( $\text{M}^+$ , 9), 200 (100); HRMS ( $\text{EI}^+$ ) calcd for  $\text{C}_{22}\text{H}_{21}\text{NO}_3$ : 347.1521, found: 347.1520.

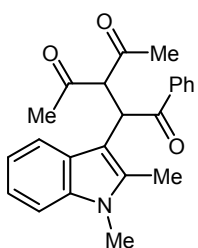

**3-Acetyl-2-(1,2-dimethyl-1H-indol-3-yl)-1-phenylpentane-1,4-dione (11e):**

White solid; yield = 76% (274 mg); mp = 147–149 °C;  $^1\text{H}$  and  $^{13}\text{C}$  NMR were consistent with the formation of rotamers;  $^1\text{H}$  NMR (300 MHz,  $\text{CDCl}_3$ ):  $\delta$  (ppm) = 1.82 (bs, 3H), 2.33 (s, 3H), 2.47 (bs, 3H), 3.53 (bs, 3H), 5.29 (bs, 1H), 5.58 (bs, 1H), 7.04–7.17 (m, 3H), 7.24–7.32 (m, 2H), 7.35–7.42 (m, 1H), 7.64 (bs, 1H),

7.90 (ad,  $J = 6.2$  Hz, 2H);  $^{13}\text{C}$  NMR (75.4 MHz,  $\text{CDCl}_3$ ):  $\delta$  (ppm) = 10.7 ( $\text{CH}_3$ ), 29.8 ( $\text{CH}_3$ ), 30.6 (bs,  $\text{CH}_3$ ), 32.6 (bs,  $\text{CH}_3$ ), 46.4 (bs, CH), 67.2 (bs, CH), 103.5 (CH), 109.0 (CH), 118.8 (bs, C), 119.9 (CH), 121.1 (CH), 126.1 (bs, C), 128.4 (2  $\times$  CH), 128.5 (2  $\times$  CH), 132.8 (CH), 134.9 (bs, C), 136.3 (bs, C), 136.9 (bs, C), 198.0 (bs, C), 201.4 (C), 203.4 (C); LRMS (70 eV, EI):  $m/z$  (%) 361 ( $\text{M}^+$ , 20), 214 (100); HRMS (EI $^+$ ) calcd for  $\text{C}_{23}\text{H}_{23}\text{NO}_3$ : 361.1678, found: 361.1680.

### General procedure for the synthesis of furanylindoles **12** and **13**:

$\text{Cu}(\text{OTf})_2$  (10 mol%, 36 mg) was added to a solution of the corresponding  $\alpha$ -acyloin **3** (1 mmol) and dicarbonyl compound (1 mmol) in toluene (4 mL) at room temperature. The resulting mixture was stirred for 2 h. Then, PTSA (10 mol%, 9 mg) was added and the reaction was heated at 50  $^\circ\text{C}$  until the corresponding intermediate tricarbonyl derivative **11** was consumed as determined by TLC. The crude reaction mixture was quenched with aqueous NaOH (0.5M) and extracted with DCM (3  $\times$  15 mL), and the combined organic layers were dried over anhydrous  $\text{Na}_2\text{SO}_4$  and concentrated at reduced pressure. The residue was purified by flash chromatography on deactivated silica gel using mixtures of hexane and EtOAc as eluents to obtain the corresponding furanylindoles **12** and **13** in the yields reported in Schemes 7 and 8.

### Spectroscopic and characterization data for compounds **12** and **13**:

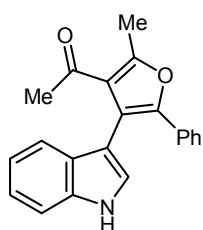

**1-(4-(1H-Indol-3-yl)-2-methyl-5-phenylfuran-3-yl)ethanone (12a)**: Yellow solid; yield = 80% (253 mg); mp = 151–153  $^\circ\text{C}$ ;  $^1\text{H}$  NMR (300 MHz,  $\text{CDCl}_3$ ):  $\delta$  (ppm) = 1.85 (s, 3H), 2.70 (s, 3H), 7.09–7.19 (m, 5H), 7.24–7.30 (m, 1H), 7.37–7.47 (m, 4H), 8.43 (s, 1H);  $^{13}\text{C}$  NMR (75.4 MHz,  $\text{CDCl}_3$ )  $\delta$  (ppm) = 14.9 ( $\text{CH}_3$ ), 30.1 ( $\text{CH}_3$ ), 108.5 (C), 111.5 (CH), 113.3 (C), 119.8 (CH), 120.5 (CH), 122.7 (CH), 123.8 (CH), 125.2 (2  $\times$  CH), 125.5 (C), 127.3 (CH), 127.9 (C), 128.3 (2  $\times$  CH), 130.6 (C), 136.3 (C), 148.6 (C), 157.8 (C), 197.0 (C); LRMS (70 eV, EI):  $m/z$  (%) 315 ( $\text{M}^+$ , 100); HRMS (EI $^+$ ) calcd for  $\text{C}_{21}\text{H}_{17}\text{NO}_2$ : 315.1259, found: 315.1259.

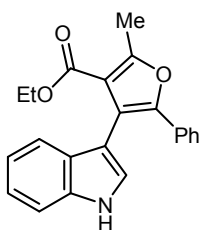

**Ethyl 4-(1*H*-indol-3-yl)-2-methyl-5-phenylfuran-3-carboxylate (12b):** Brown

solid; yield = 67% (231 mg); mp = 179–181 °C; <sup>1</sup>H NMR (300 MHz, CDCl<sub>3</sub>): δ (ppm) = 0.85 (t, *J* = 7.1 Hz, 3H), 2.72 (s, 3H), 4.01 (q, *J* = 7.1 Hz, 2H), 7.04 (at, *J* = 7.5 Hz, 1H), 7.11–7.23 (m, 5H), 7.32 (d, *J* = 7.9 Hz, 1H), 7.38–7.48 (m, 3H),

8.27 (s, 1H); <sup>13</sup>C NMR (75.4 MHz, CDCl<sub>3</sub>): δ (ppm) = 13.7 (CH<sub>3</sub>), 14.5 (CH<sub>3</sub>), 59.9 (CH<sub>2</sub>), 108.5 (C), 111.1 (CH), 114.4 (C), 116.6 (C), 119.8 (CH), 120.3 (CH), 122.1 (CH), 123.9 (CH), 125.5 (2 × CH), 127.3 (CH), 127.9 (C), 128.3 (2 × CH), 130.8 (C), 136.2 (C), 148.6 (C), 158.4 (C), 164.4 (C); LRMS (70 eV, EI): *m/z* (%) 345 (M<sup>+</sup>, 100); HRMS (EI<sup>+</sup>) calcd for C<sub>22</sub>H<sub>19</sub>NO<sub>3</sub>: 345.1365, found: 345.1368.

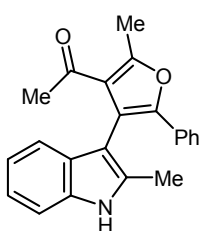

**1-(2-Methyl-4-(2-methyl-1*H*-indol-3-yl)-5-phenylfuran-3-yl)ethanone (12c):**

Yellow solid; yield = 90% (296 mg); mp = 128–130 °C; <sup>1</sup>H NMR (300 MHz, CDCl<sub>3</sub>): δ (ppm) = 1.84 (s, 3H), 2.20 (s, 3H), 2.72 (s, 3H), 7.07 (ddd, *J* = 7.9, 7.2, 0.9 Hz, 1H), 7.12–7.23 (m, 4H), 7.31 (d, *J* = 7.8 Hz, 1H), 7.35–7.42 (m,

3H), 8.29 (s, 1H); <sup>13</sup>C NMR (75.4 MHz, CDCl<sub>3</sub>): δ (ppm) = 12.2 (CH<sub>3</sub>), 14.9 (CH<sub>3</sub>), 29.7 (CH<sub>3</sub>), 105.5 (C), 110.6 (CH), 113.1 (C), 119.1 (CH), 120.4 (CH), 121.9 (CH), 124.8 (2 × CH), 125.2 (C), 127.2 (CH), 128.5 (2 × CH), 129.0 (C), 130.8 (C), 133.0 (C), 135.8 (C), 148.5 (C), 158.1 (C), 196.9 (C); LRMS (70 eV, EI): *m/z* (%) 329 (M<sup>+</sup>, 100); HRMS (EI<sup>+</sup>) calcd for C<sub>22</sub>H<sub>19</sub>NO<sub>2</sub>: 329.1416, found: 329.1417.

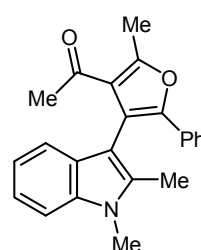

**1-(4-(1,2-Dimethyl-1*H*-indol-3-yl)-2-methyl-5-phenylfuran-3-yl)ethanone**

**(12d):** Yellow solid; yield = 84% (288 mg); mp = 181–183 °C; <sup>1</sup>H NMR (300 MHz,

CDCl<sub>3</sub>): δ (ppm) = 1.78 (s, 3H), 2.19 (s, 3H), 2.71 (s, 3H), 3.77 (s, 3H), 7.02–7.10 (m, 1H), 7.12–7.21 (m, 3H), 7.22–7.26 (m, 1H), 7.31 (d, *J* = 7.8 Hz, 1H),

7.34–7.41 (m, 3H); <sup>13</sup>C NMR (75.4 MHz, CDCl<sub>3</sub>): δ (ppm) = 11.0 (CH<sub>3</sub>), 14.9

(CH<sub>3</sub>), 29.8 (CH<sub>3</sub>), 30.0 (CH<sub>3</sub>), 104.8 (C), 109.0 (CH), 113.6 (C), 119.2 (CH), 120.1 (CH), 121.5 (CH), 124.8 (2 × CH), 125.4 (C), 127.2 (CH), 128.1 (C), 128.5 (2 × CH), 131.0 (C), 134.9 (C), 137.3 (C), 148.5 (C), 158.0 (C), 196.8 (C); LRMS (70 eV, EI): *m/z* (%) 343 (M<sup>+</sup>, 100); HRMS (EI<sup>+</sup>) calcd for C<sub>23</sub>H<sub>21</sub>NO<sub>2</sub>: 343.1572, found: 343.1574.

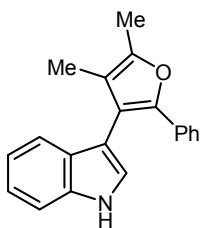

**3-(4,5-Dimethyl-2-phenylfuran-3-yl)-1H-indole (13):** Yellow solid; yield = 58% (166 mg); mp = 116–118 °C;  $^1\text{H}$  NMR (300 MHz,  $\text{CDCl}_3$ ):  $\delta$  (ppm) = 1.86 (s, 3H), 2.40 (s, 3H), 7.06–7.21 (m, 5H), 7.26 (at,  $J = 7.5$  Hz, 1H), 7.37 (d,  $J = 7.8$  Hz, 1H), 7.44 (d,  $J = 8.1$  Hz, 1H), 7.50 (d,  $J = 7.8$  Hz, 2H), 8.21 (s, 1H);  $^{13}\text{C}$  NMR (75.4 MHz,  $\text{CDCl}_3$ ):  $\delta$  (ppm) = 9.1 ( $\text{CH}_3$ ), 12.0 ( $\text{CH}_3$ ), 109.5 (C), 111.2 (CH), 116.5 (C), 118.1 (C), 119.9 (CH), 120.6 (CH), 122.3 (CH), 123.3 (CH), 124.8 (2  $\times$  CH), 126.3 (CH), 127.1 (C), 128.2 (2  $\times$  CH), 131.9 (C), 136.3 (C), 146.6 (C), 147.1 (C); LRMS (70 eV, EI):  $m/z$  (%) 287 ( $\text{M}^+$ , 100); HRMS ( $\text{EI}^+$ ) calcd for  $\text{C}_{20}\text{H}_{17}\text{NO}$ : 287.1310, found: 287.1310.

## **$^1\text{H}$ and $^{13}\text{C}$ NMR spectra of characterized compounds**

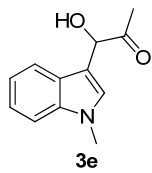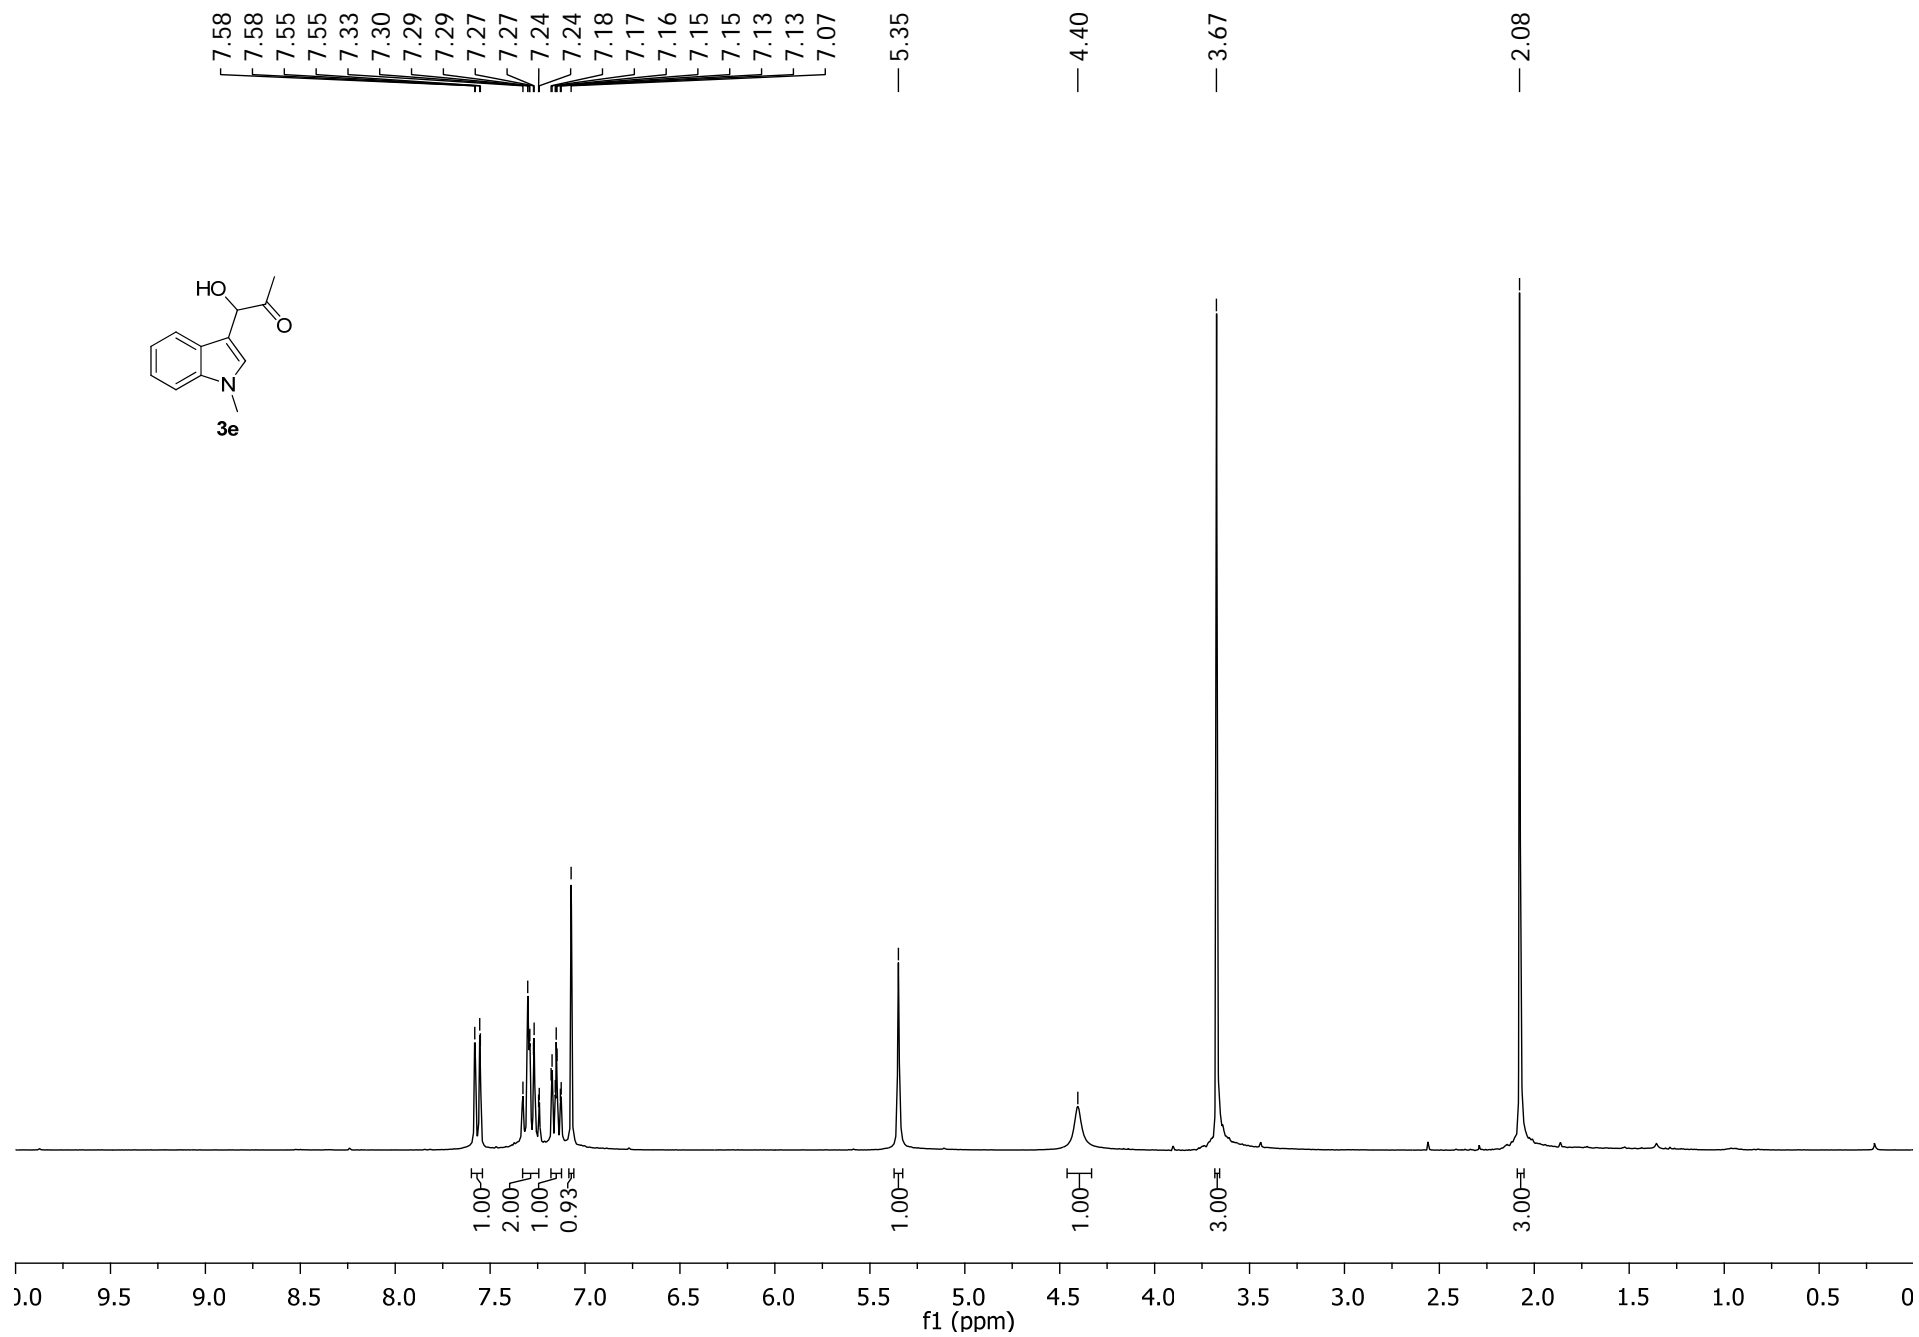



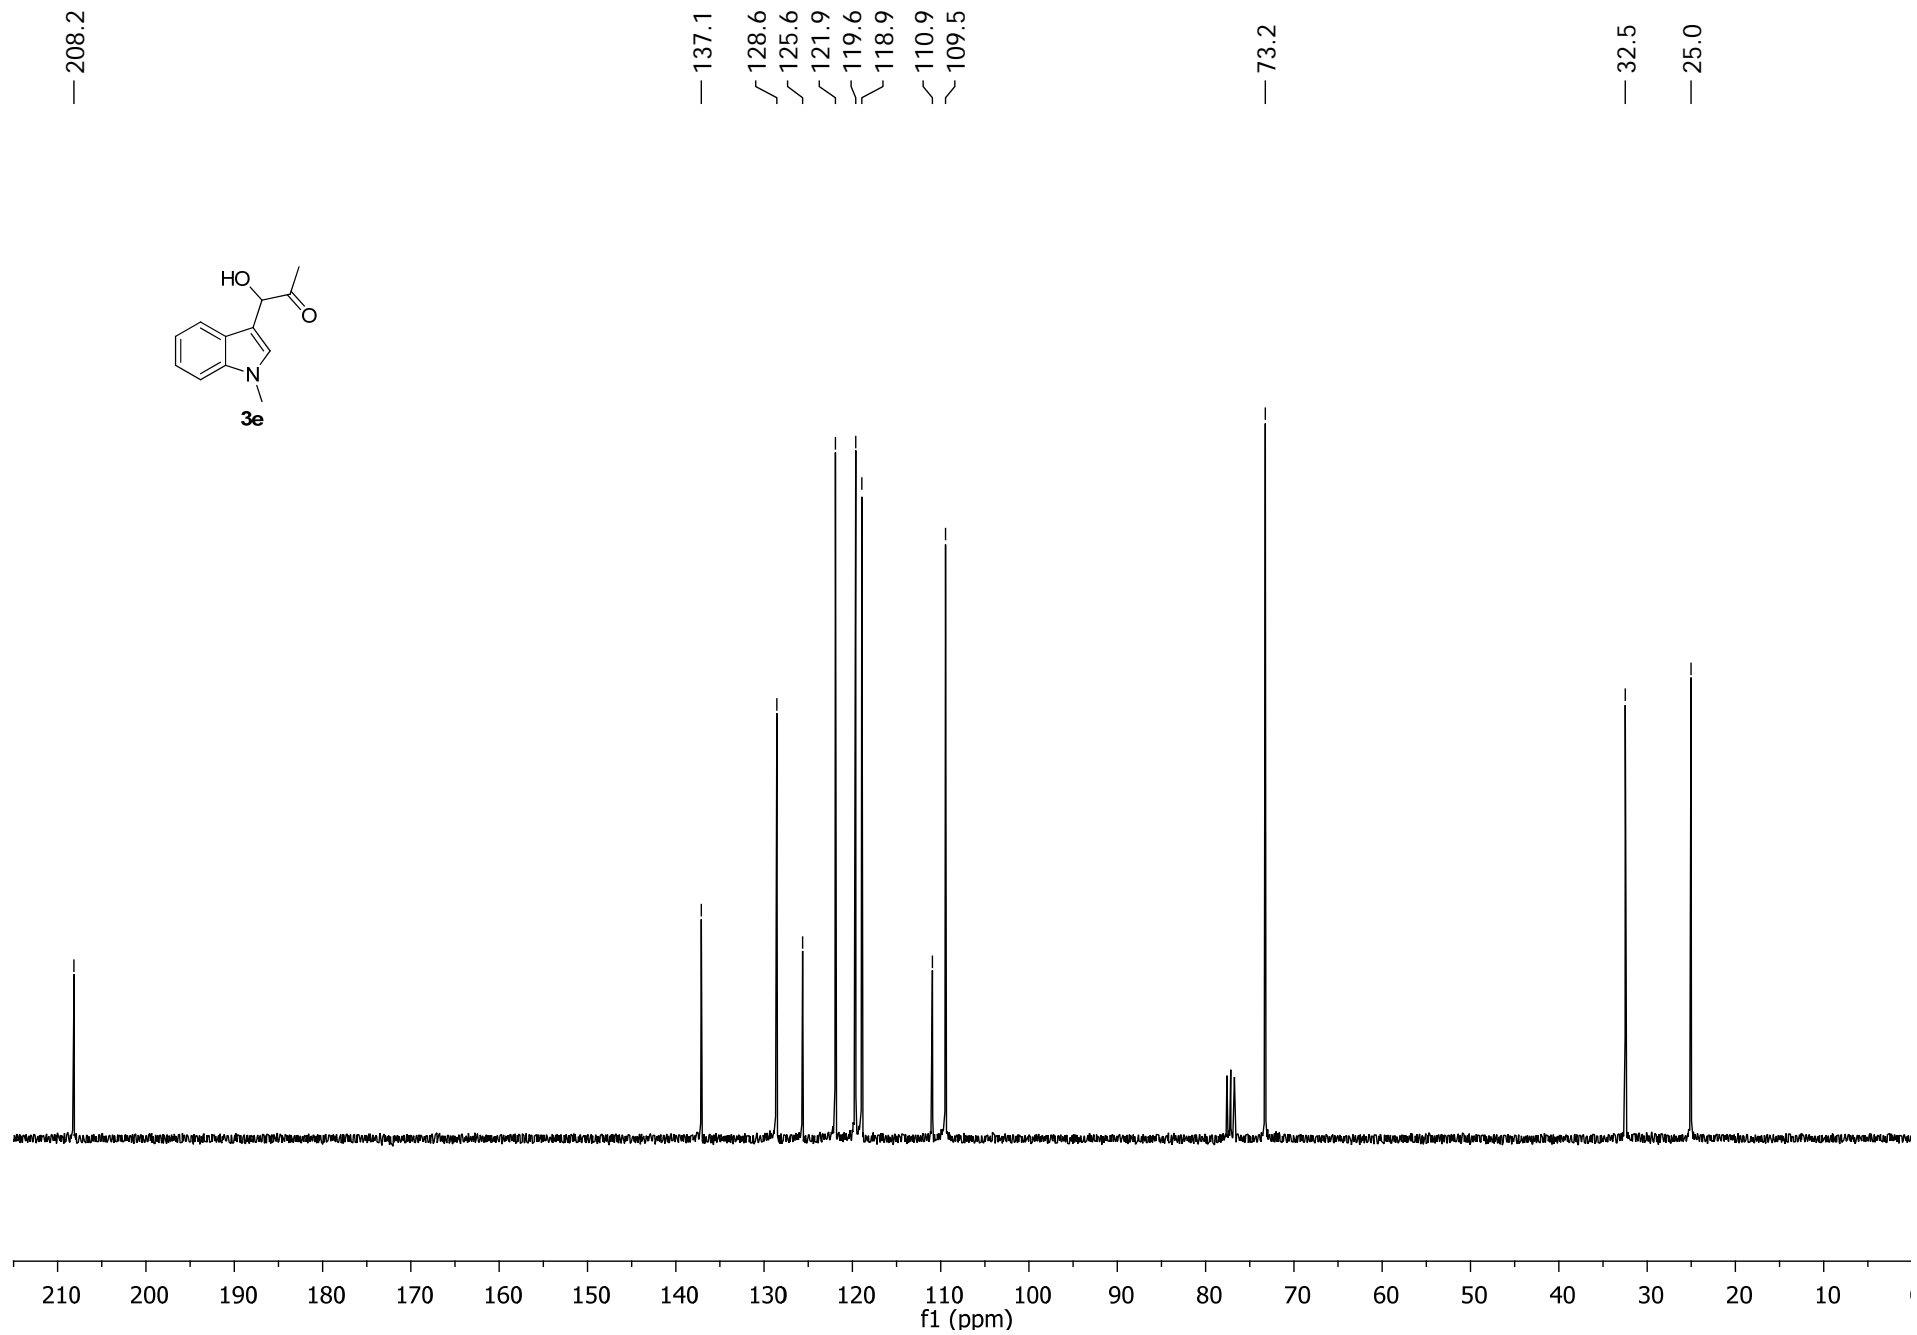

8.18  
8.17  
8.17  
8.17  
8.17  
8.15  
8.15  
8.15  
8.14  
7.63  
7.63  
7.63  
7.62  
7.62  
7.61  
7.60  
7.60  
7.60  
7.59  
7.56  
7.54  
7.48  
7.48  
7.47  
7.46  
7.45  
7.43  
7.39  
7.36  
7.36  
7.35  
7.32  
7.32  
7.32  
7.30  
7.29  
7.29  
7.27  
7.26  
7.25  
7.23  
7.23  
7.21  
7.20  
7.16  
7.15  
7.15  
7.14  
7.13  
7.13  
7.12  
7.11  
6.99  
6.89  
6.57  
3.71

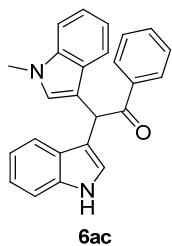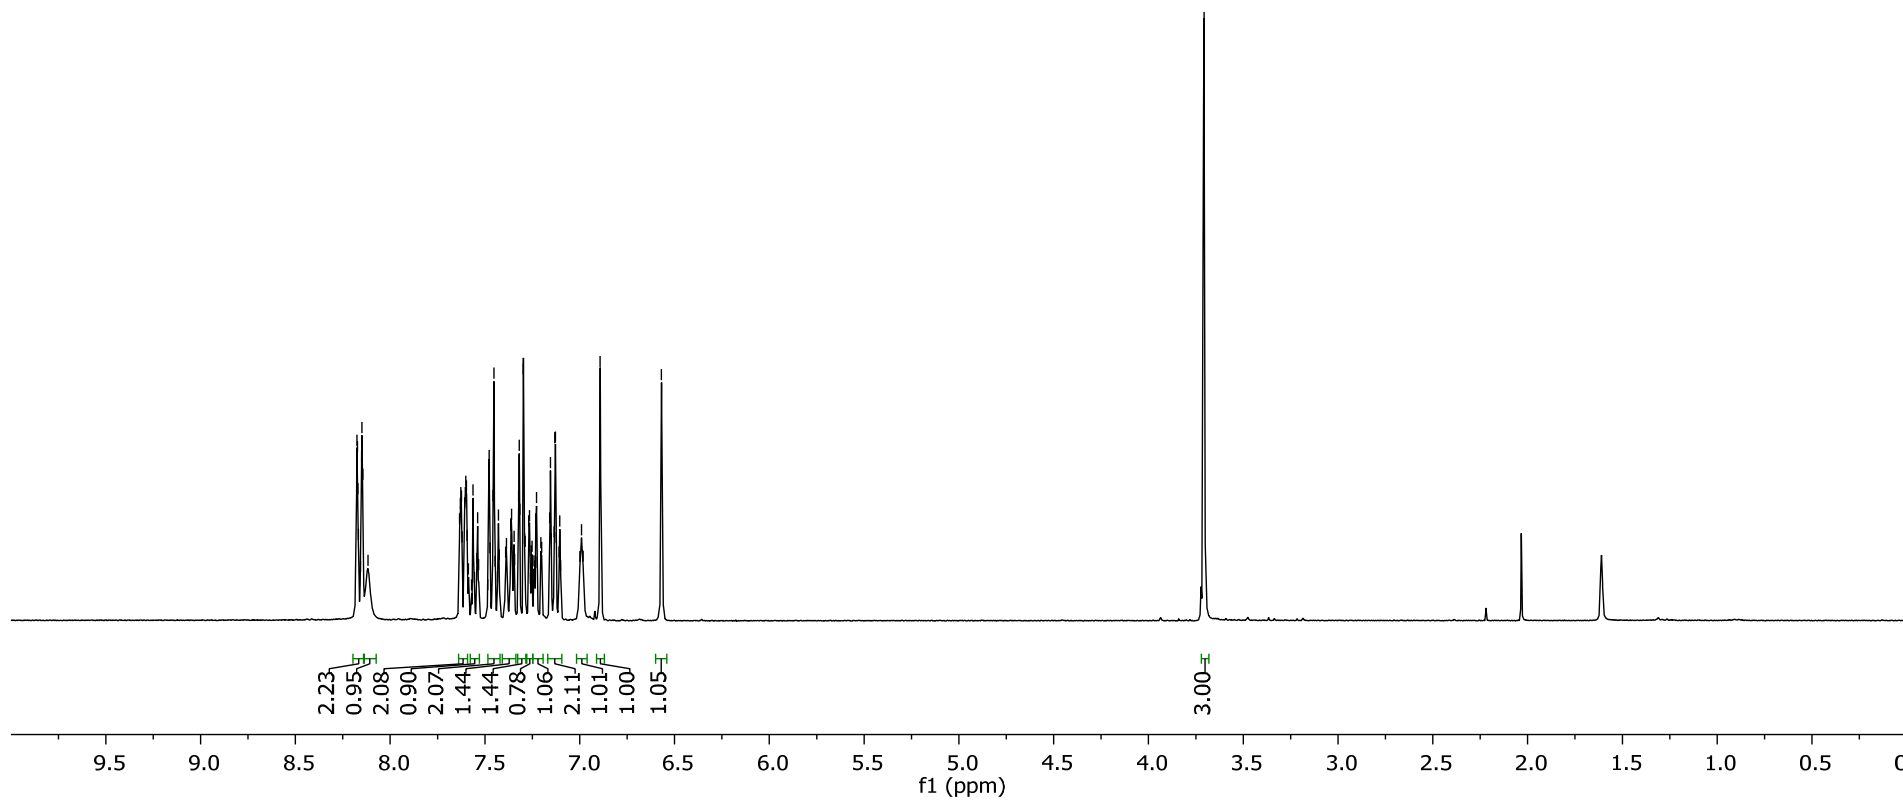

— 198.8

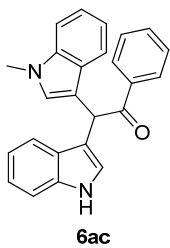

137.4  
137.1  
136.6  
133.0  
128.9  
128.7  
127.2  
126.7  
124.0  
122.3  
121.9  
119.8  
119.3  
119.1  
119.1  
114.6  
112.7  
111.4  
109.5

— 42.0

— 32.9

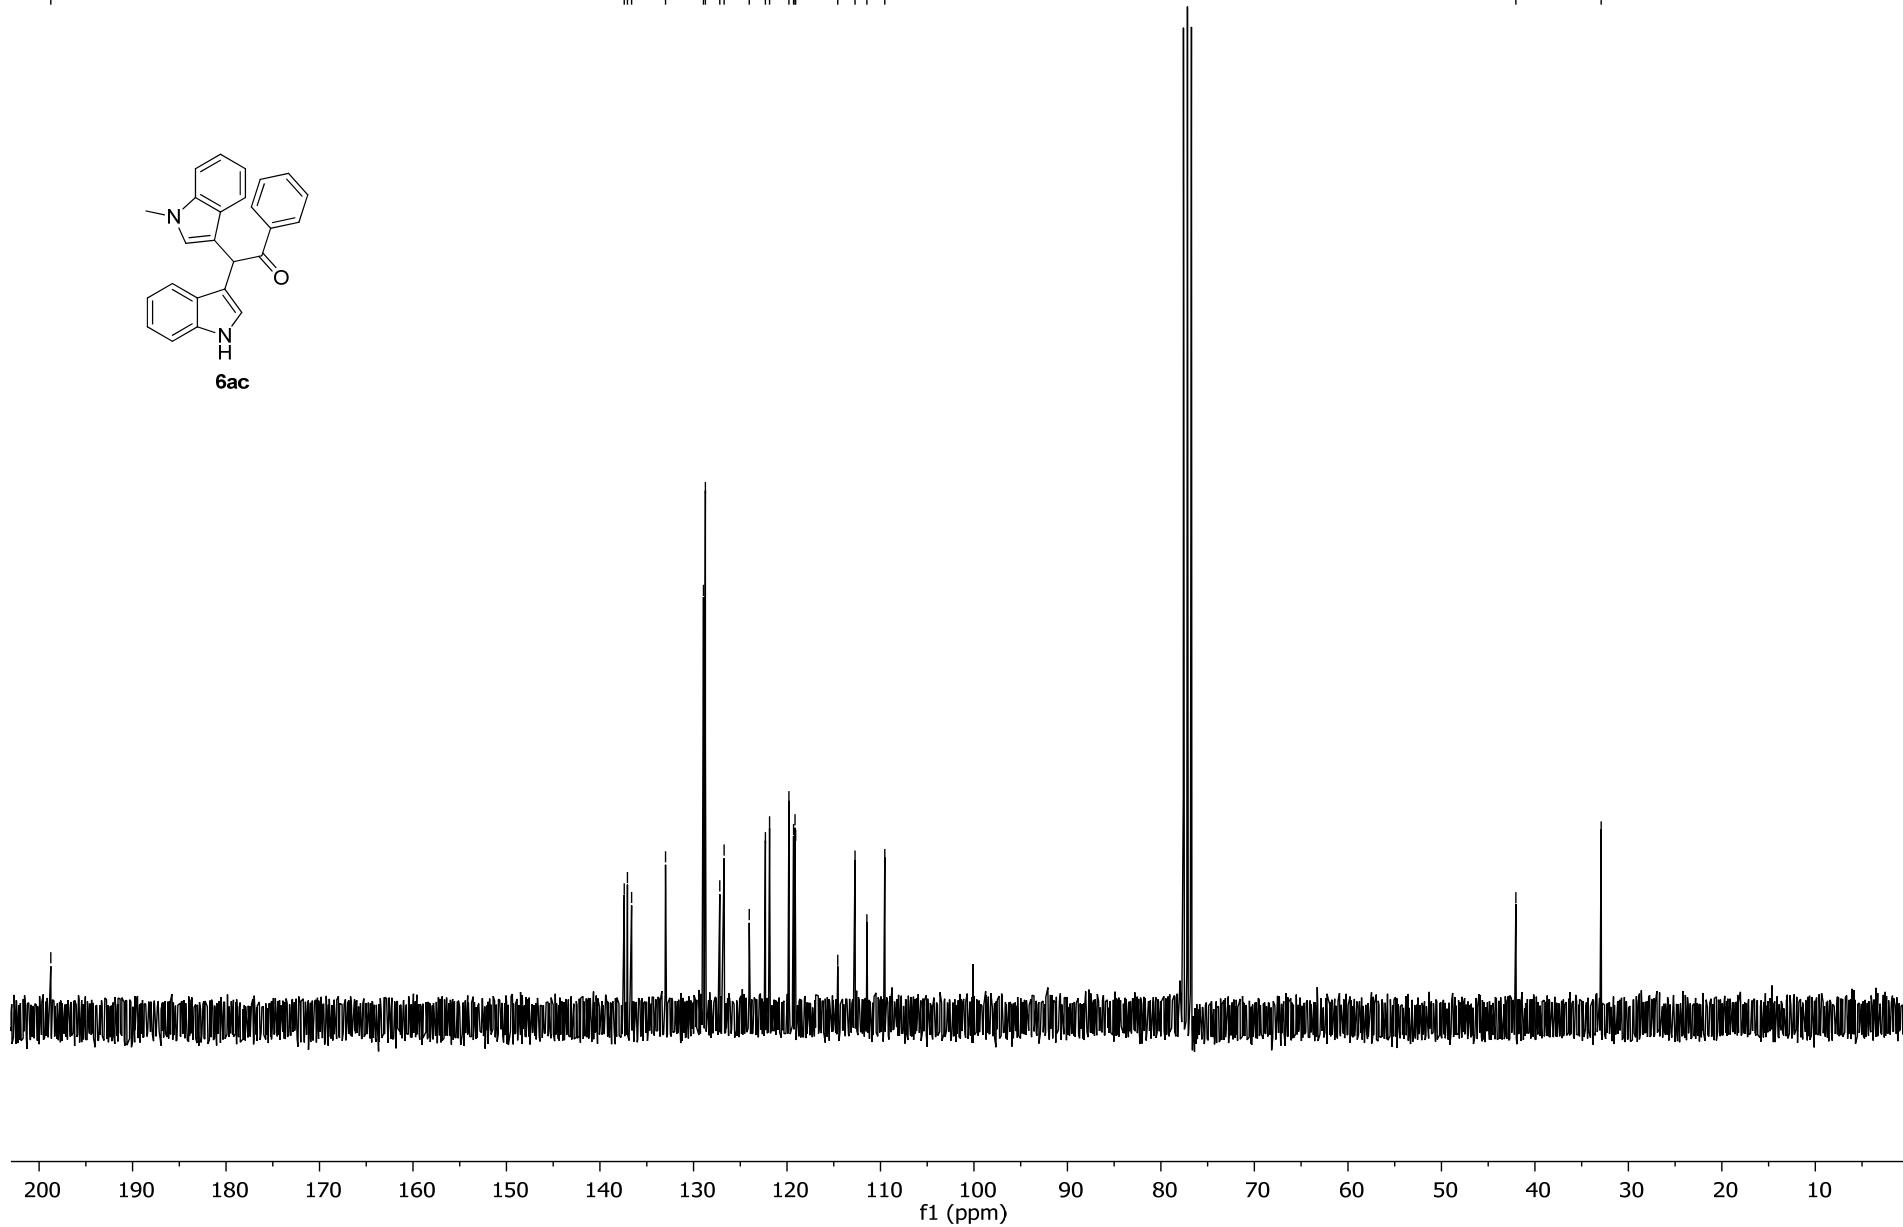

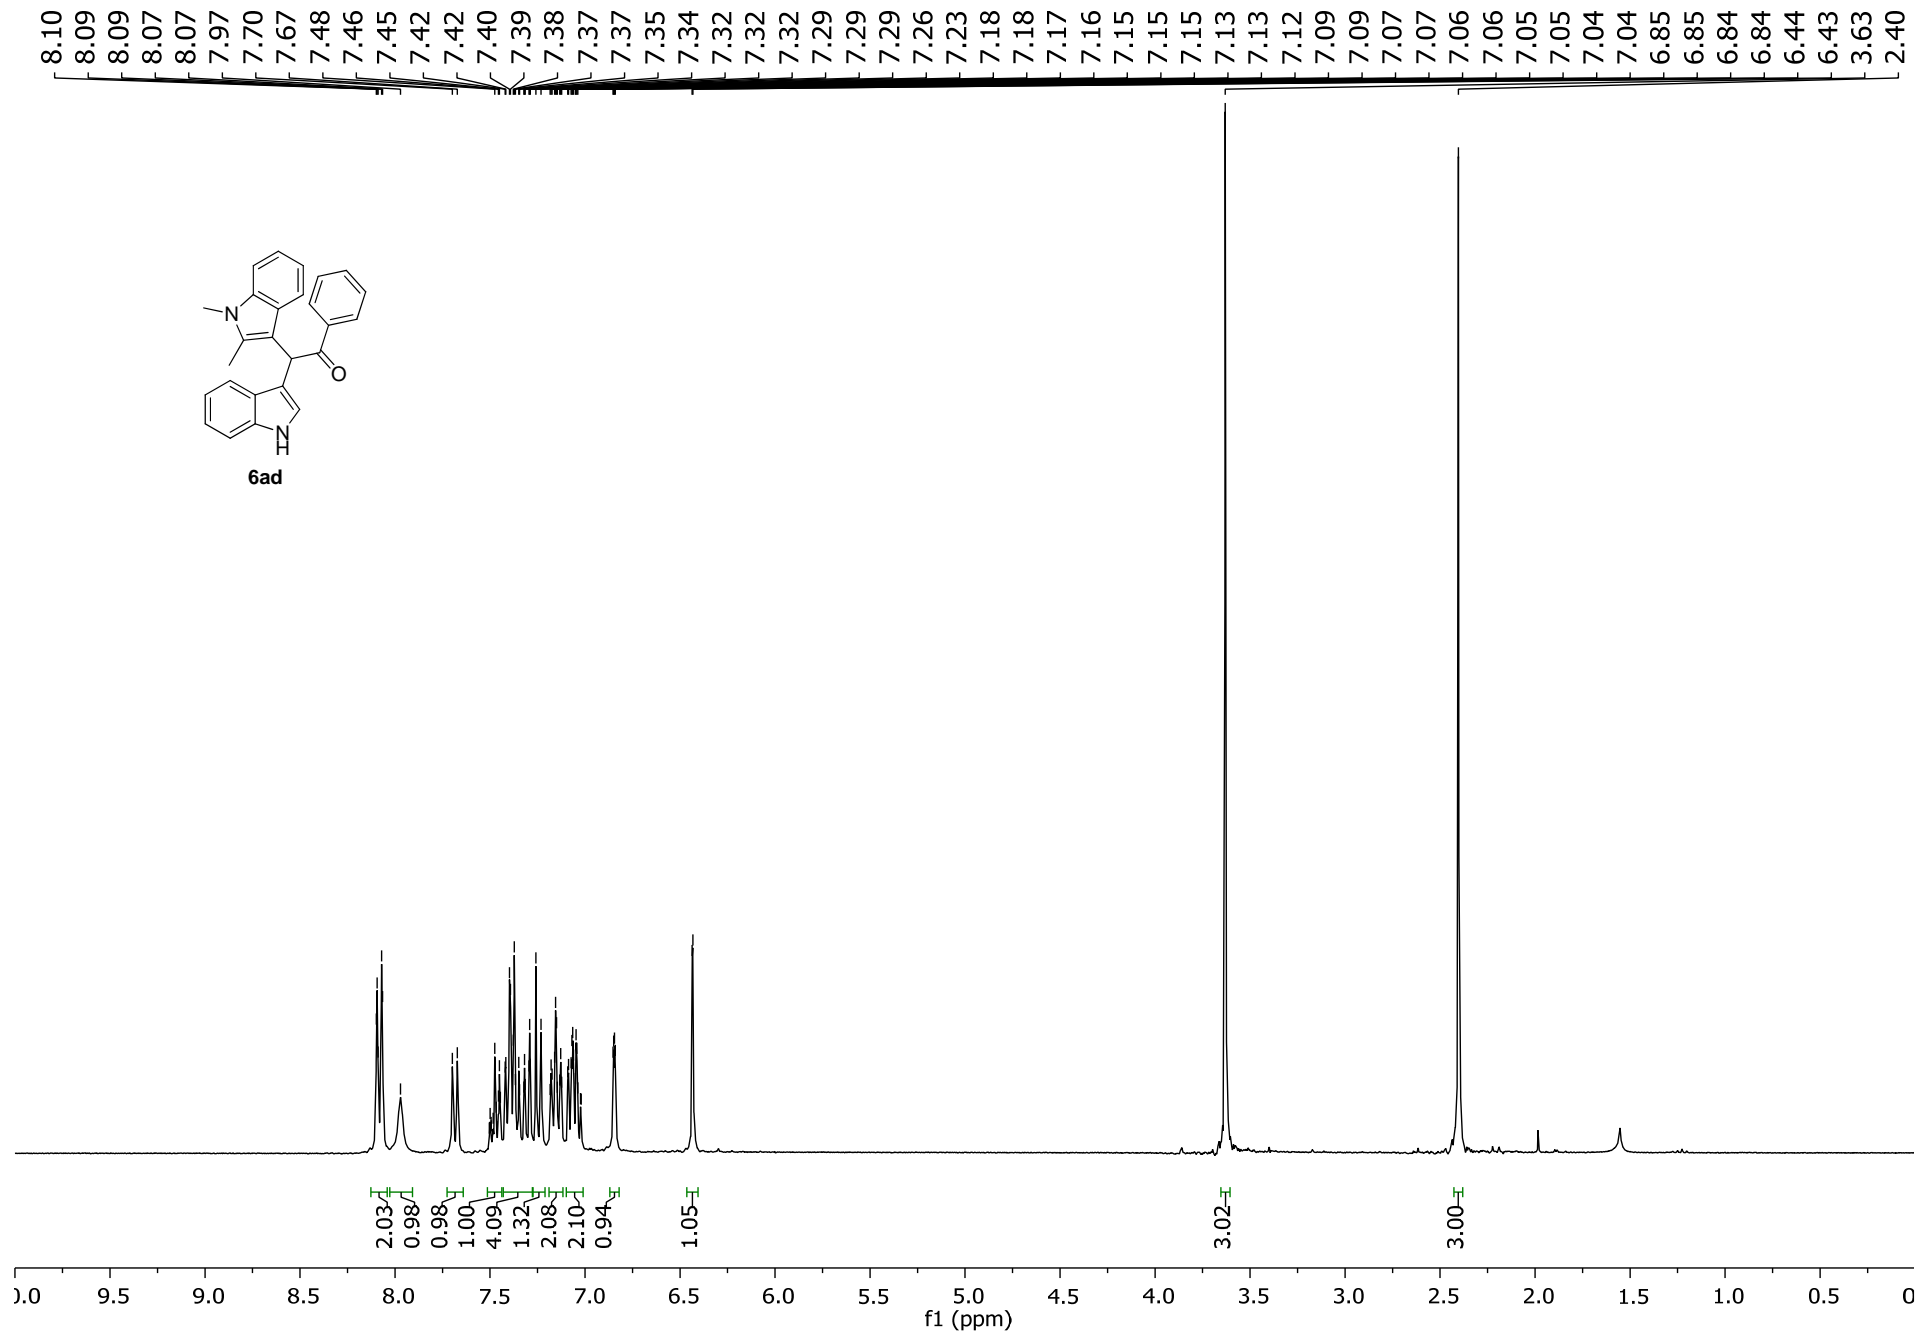

— 198.1

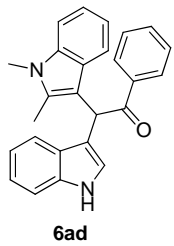

137.4  
136.9  
136.6  
134.6  
132.7  
128.7  
128.6  
127.3  
127.1  
— 124.2  
122.1  
120.8  
119.6  
119.4  
119.1  
119.1  
114.8  
111.4  
108.8  
107.5

— 42.6

— 29.7

— 11.0

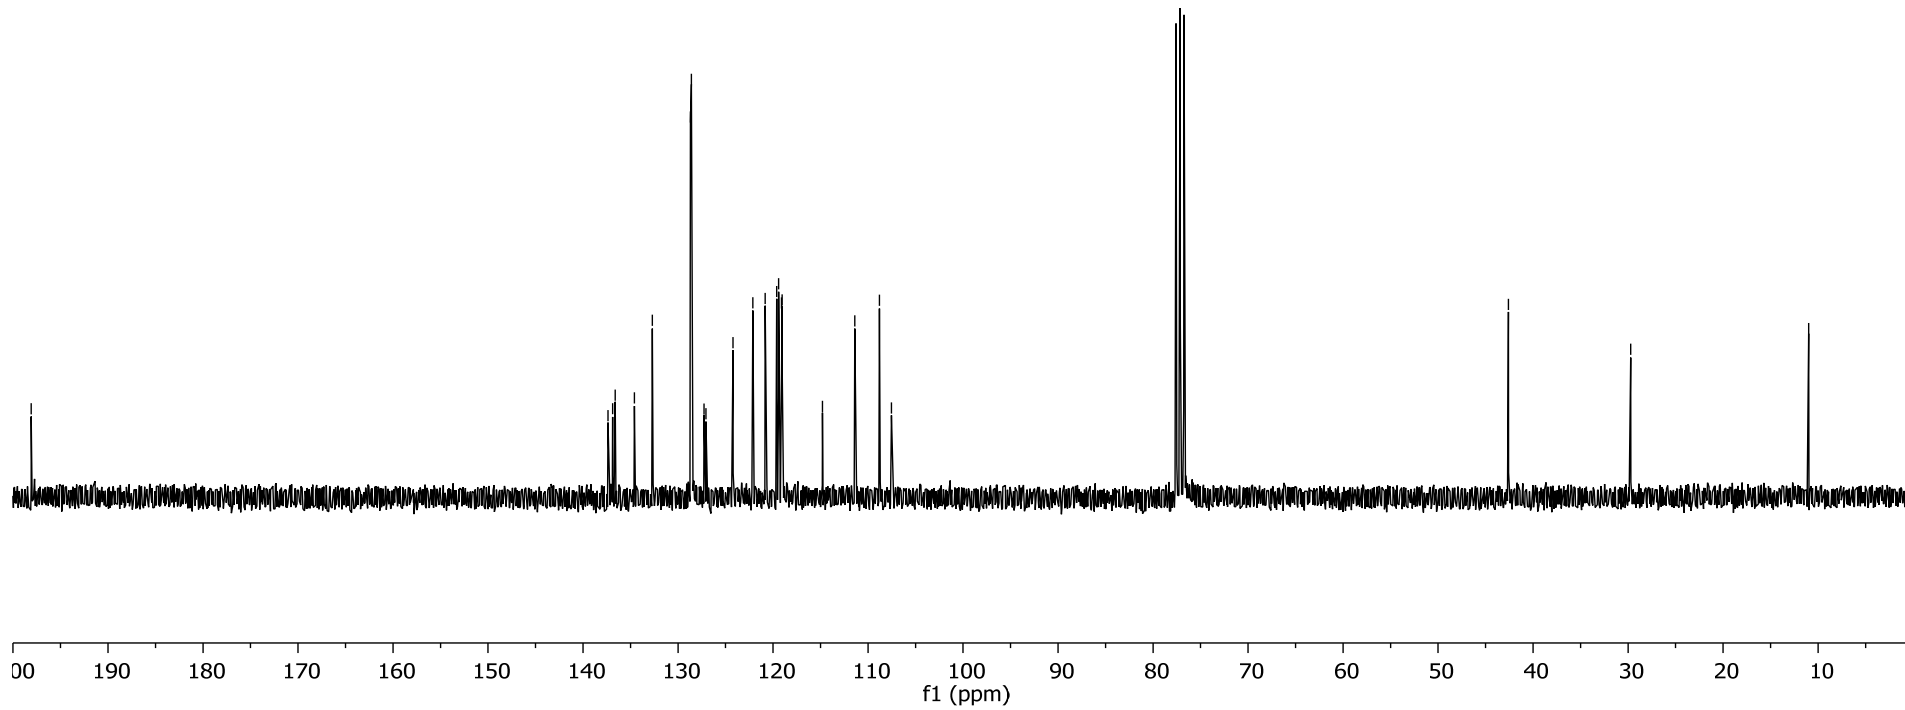

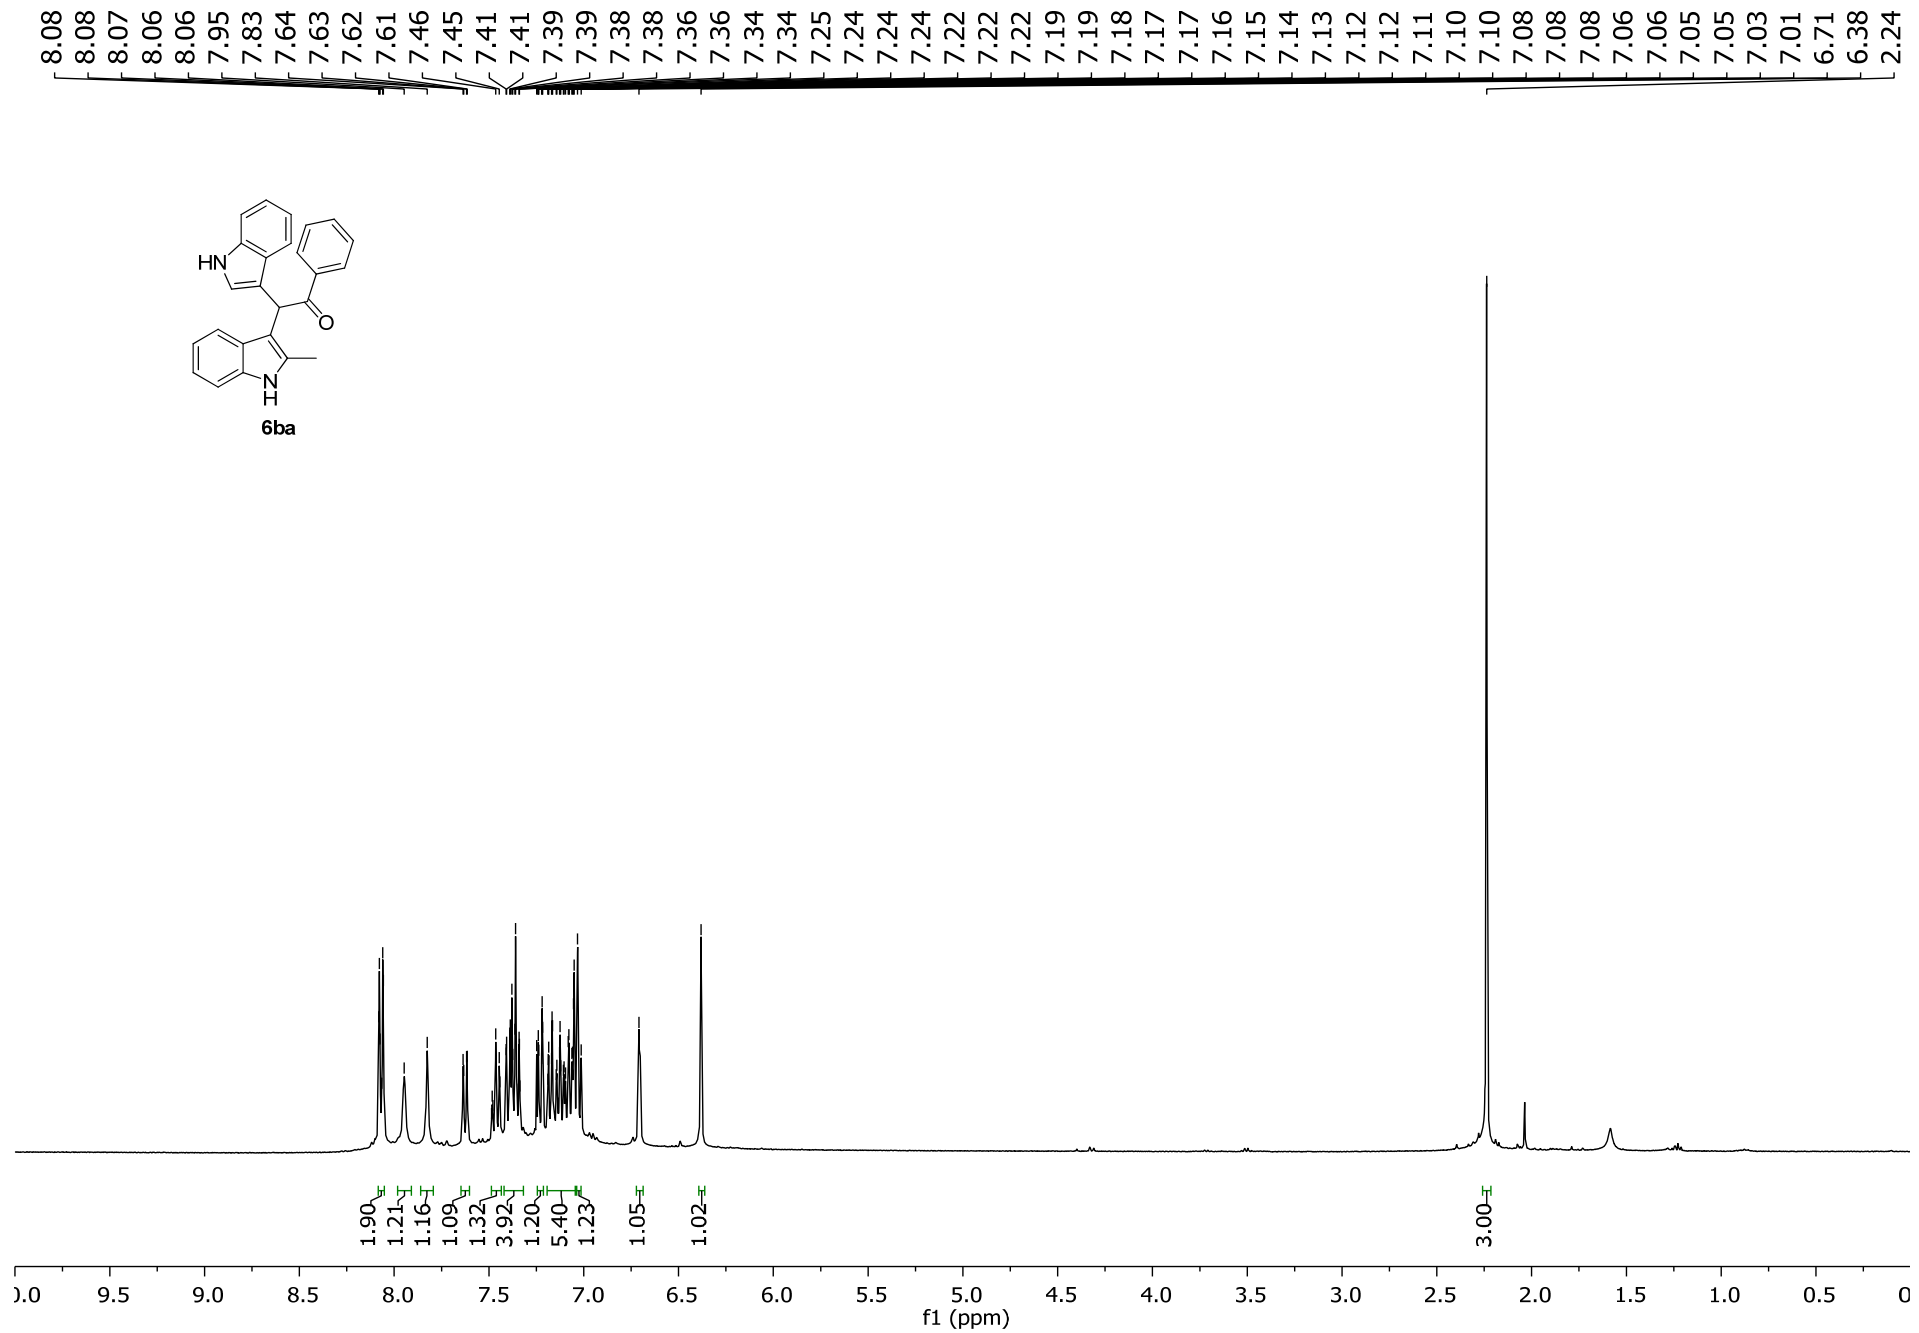

— 198.4

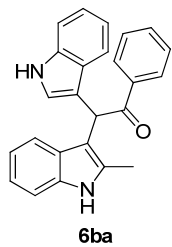

137.3  
136.6  
135.3  
132.9  
132.8  
128.7  
128.6  
128.2  
127.0  
124.3  
122.1  
121.2  
119.7  
119.6  
119.0  
118.9  
114.3  
111.5  
110.5  
108.2

— 42.4

— 12.4

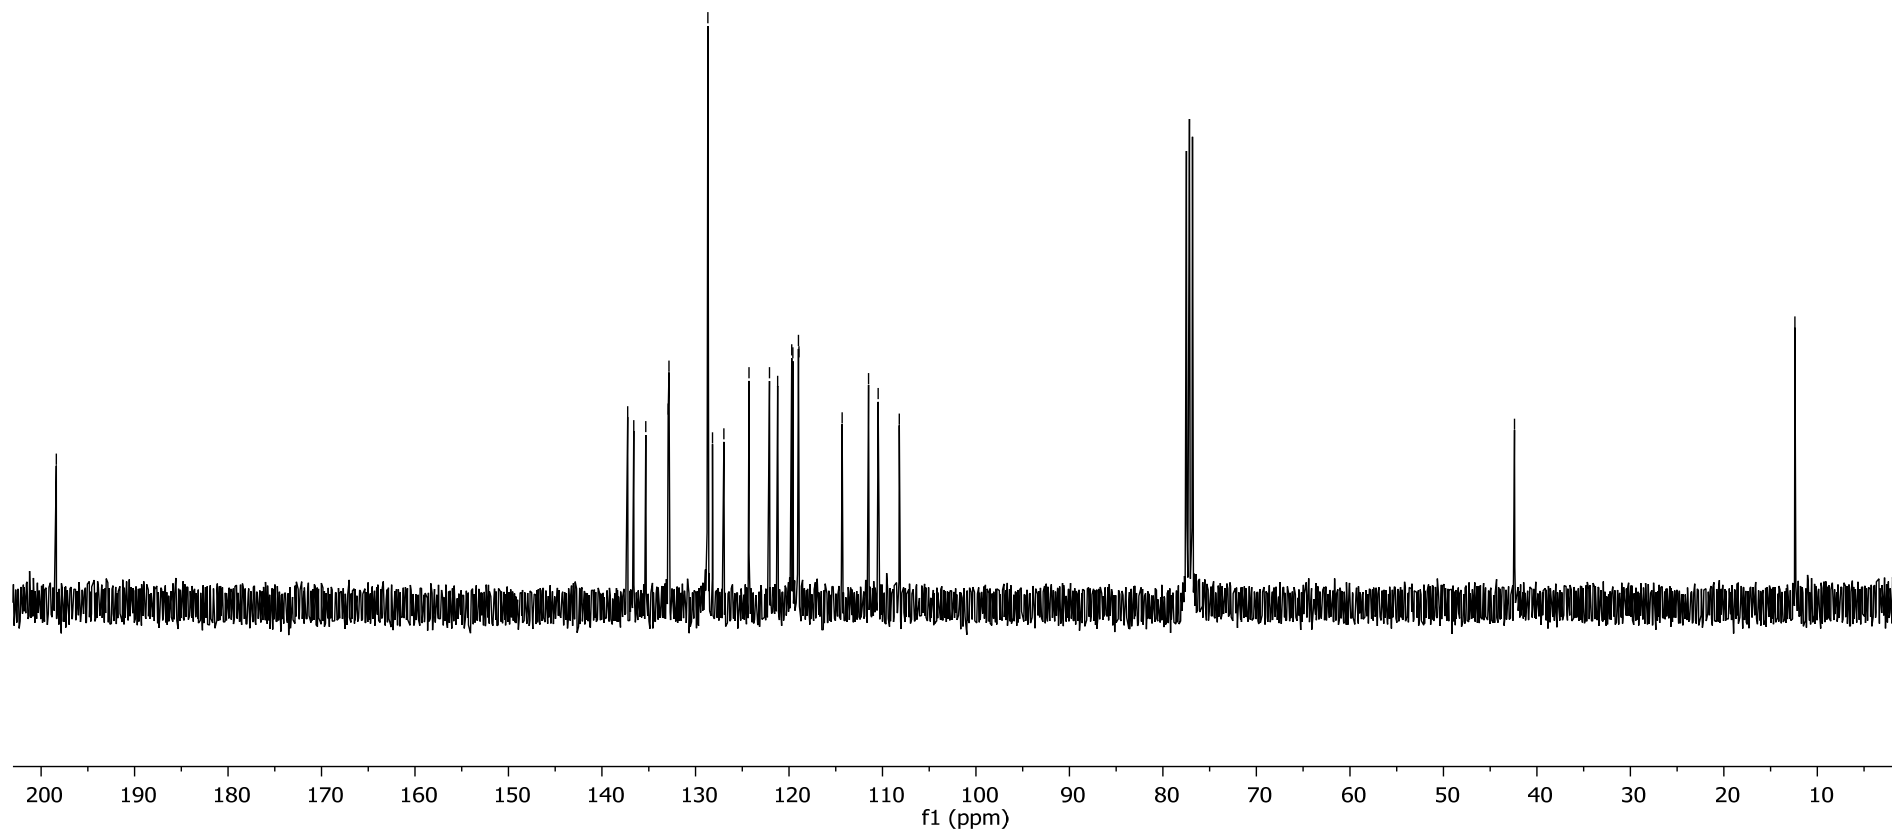

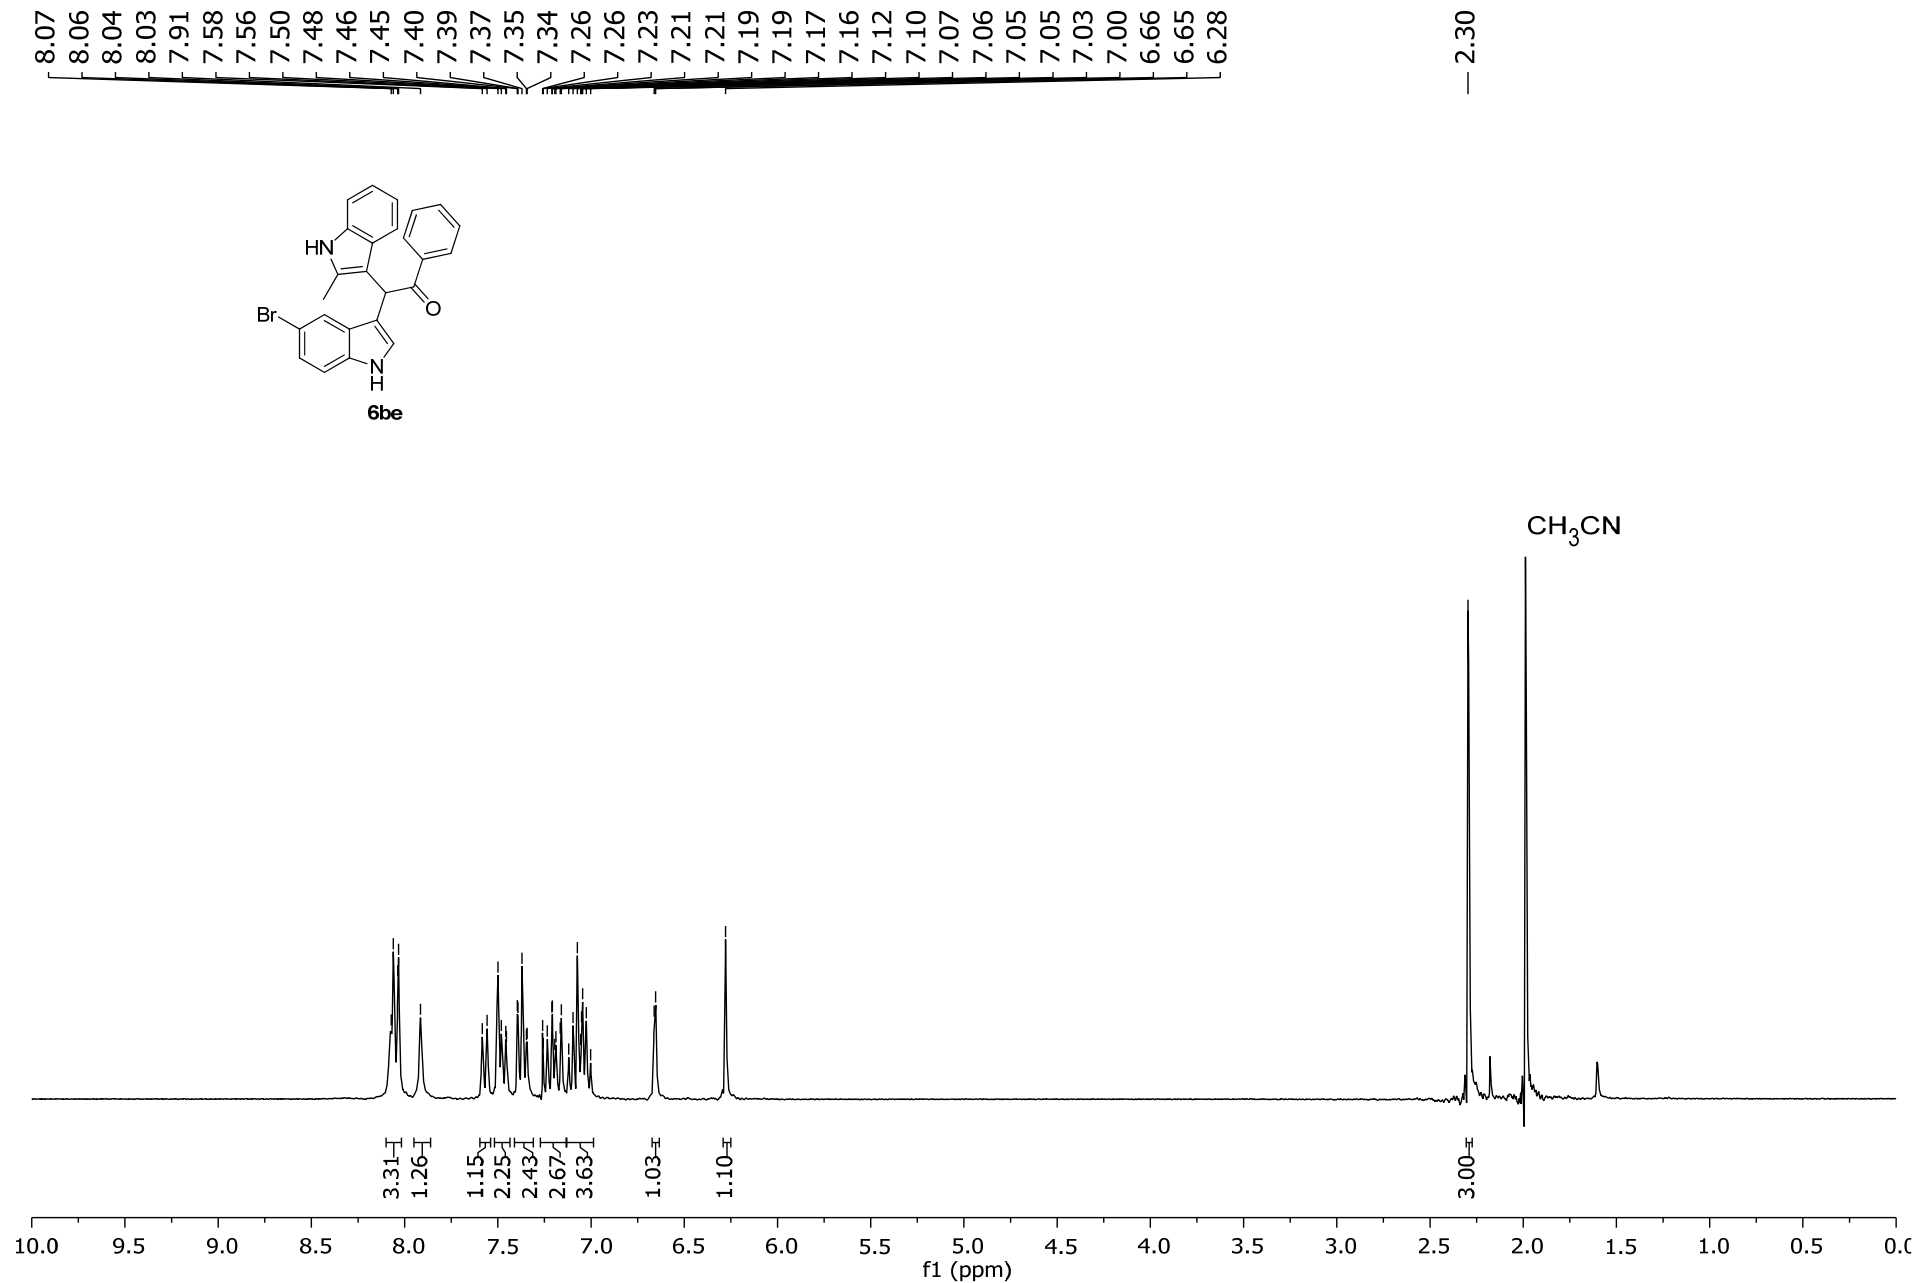



— 198.1

136.9  
135.3  
135.3  
133.0  
132.7  
128.7  
127.9  
125.7  
124.9  
121.5  
121.4  
119.8  
118.9  
114.0  
113.0  
112.9  
110.5  
108.0

— 42.3

— 12.4

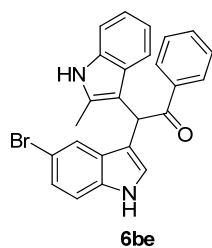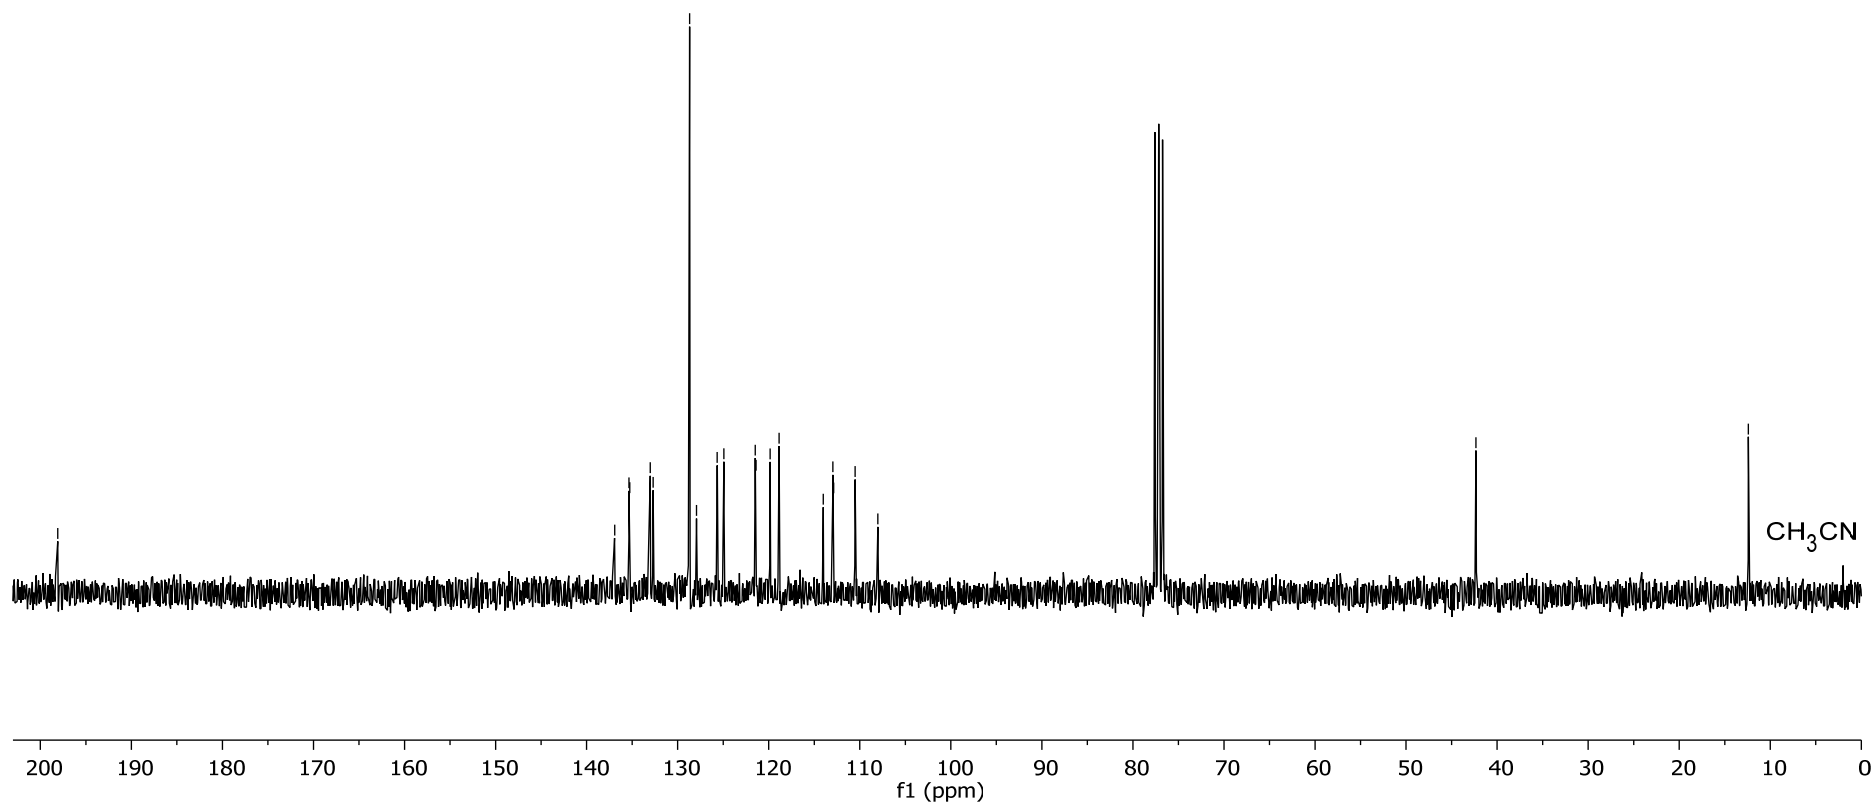

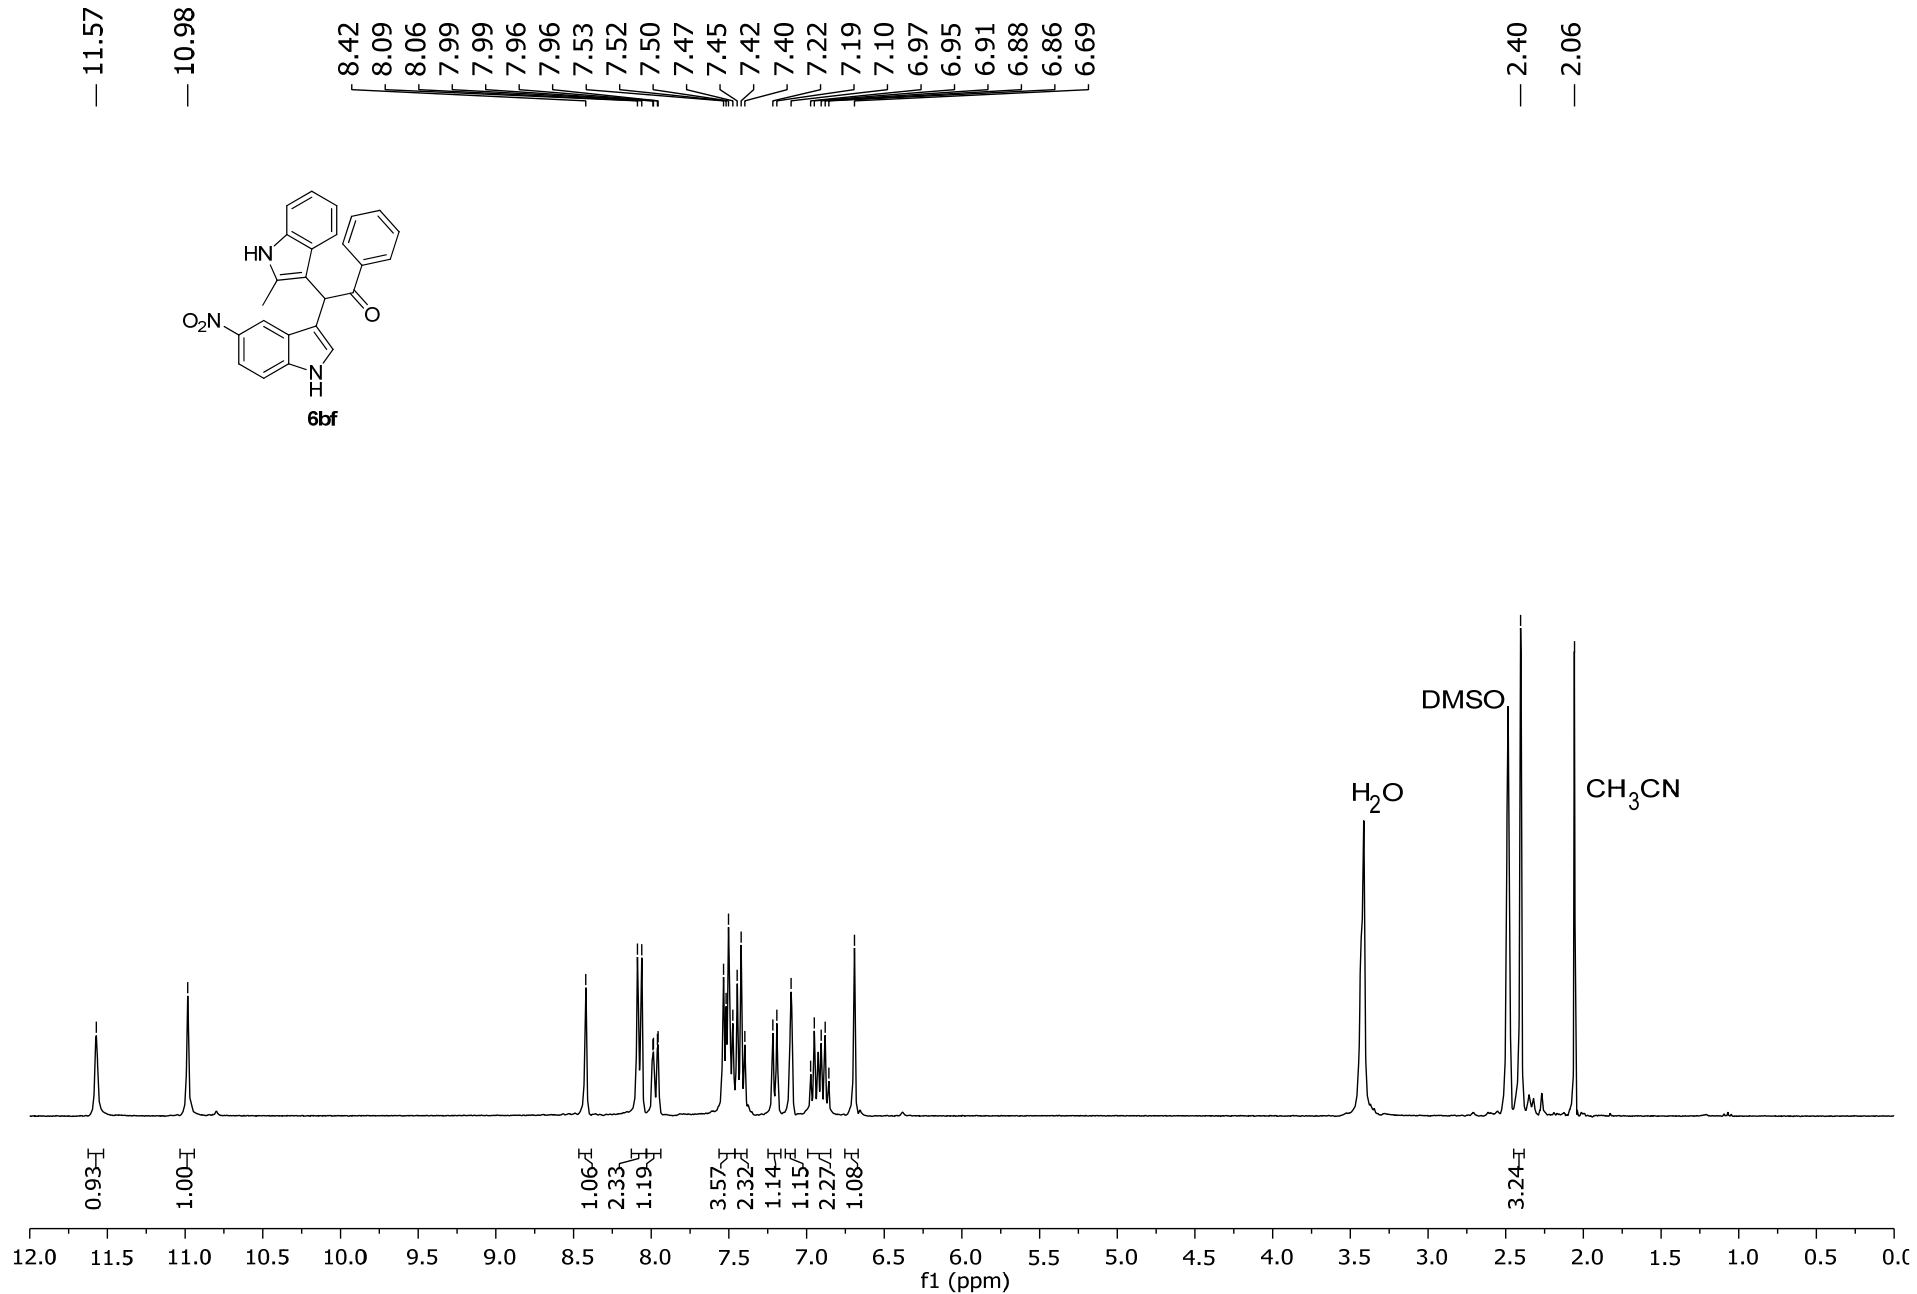

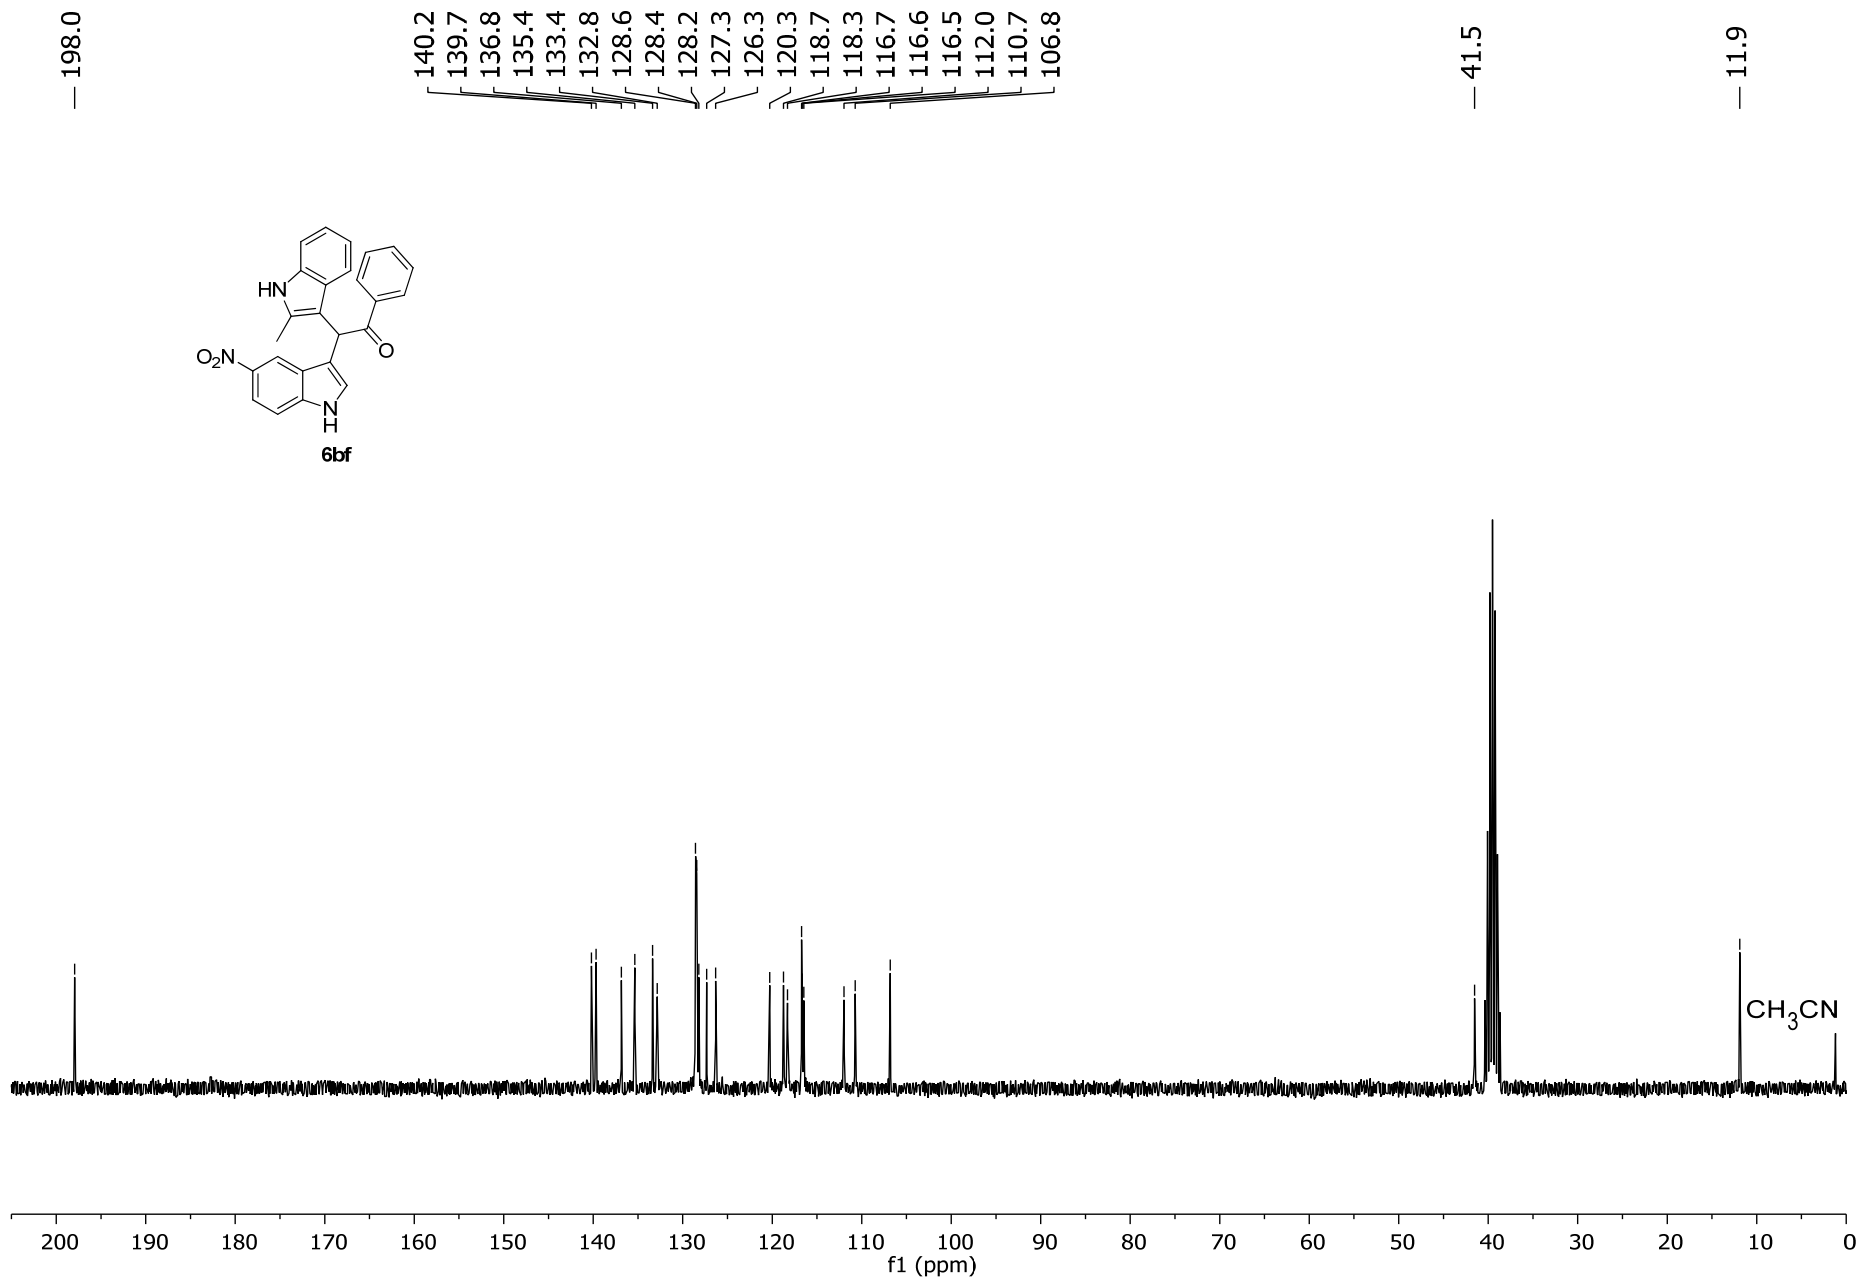

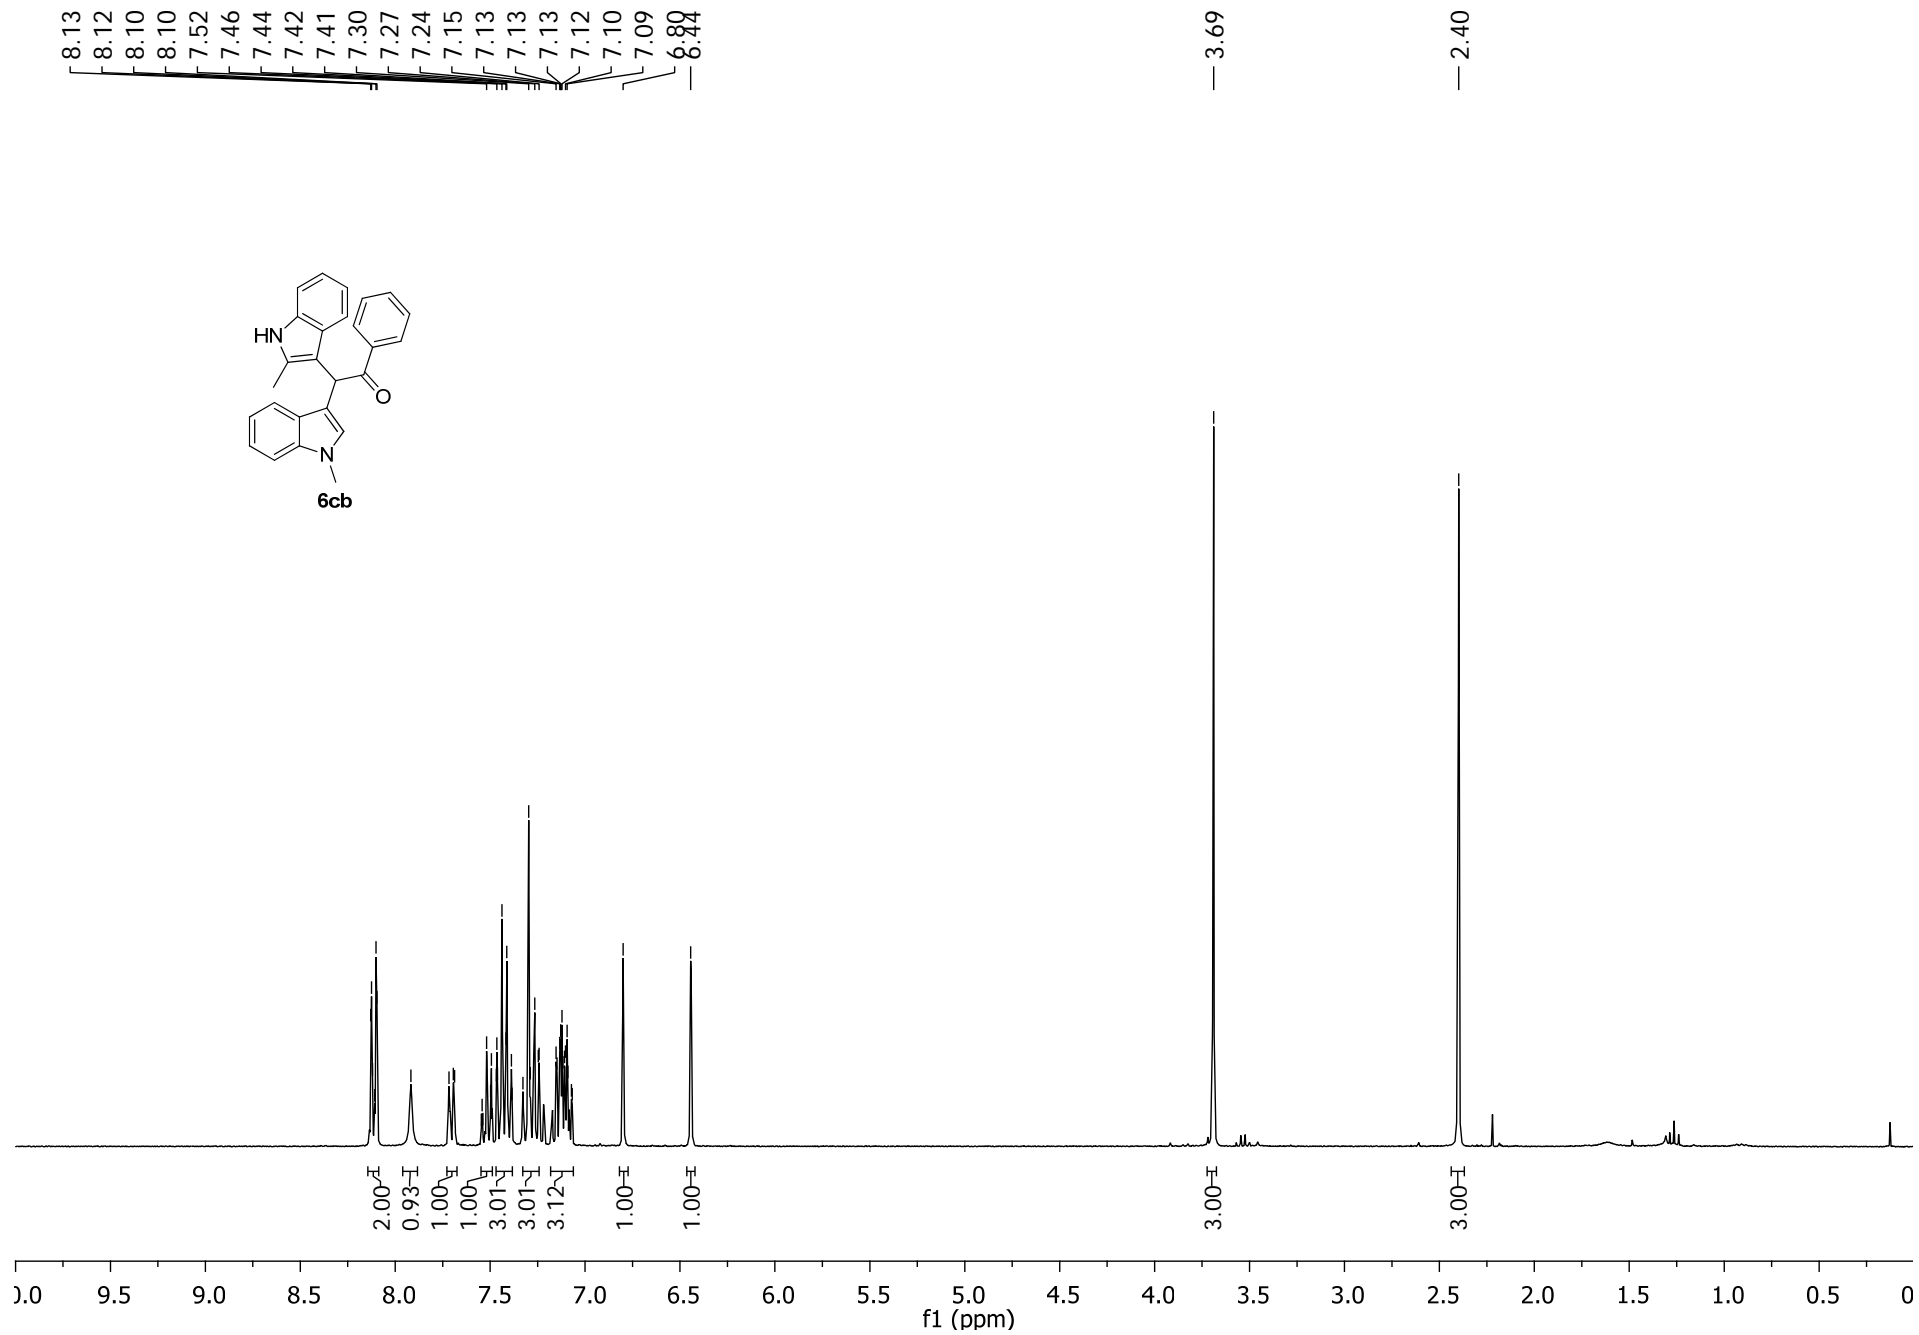

— 198.3

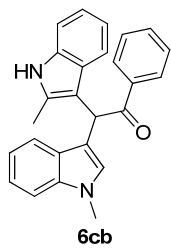

137.4  
137.2  
135.3  
132.8  
132.8  
128.8  
128.7  
128.6  
128.1  
127.4  
121.7  
121.2  
119.7  
119.1  
118.9  
112.8  
110.4  
109.5  
108.3

— 42.3

— 32.8

— 12.4

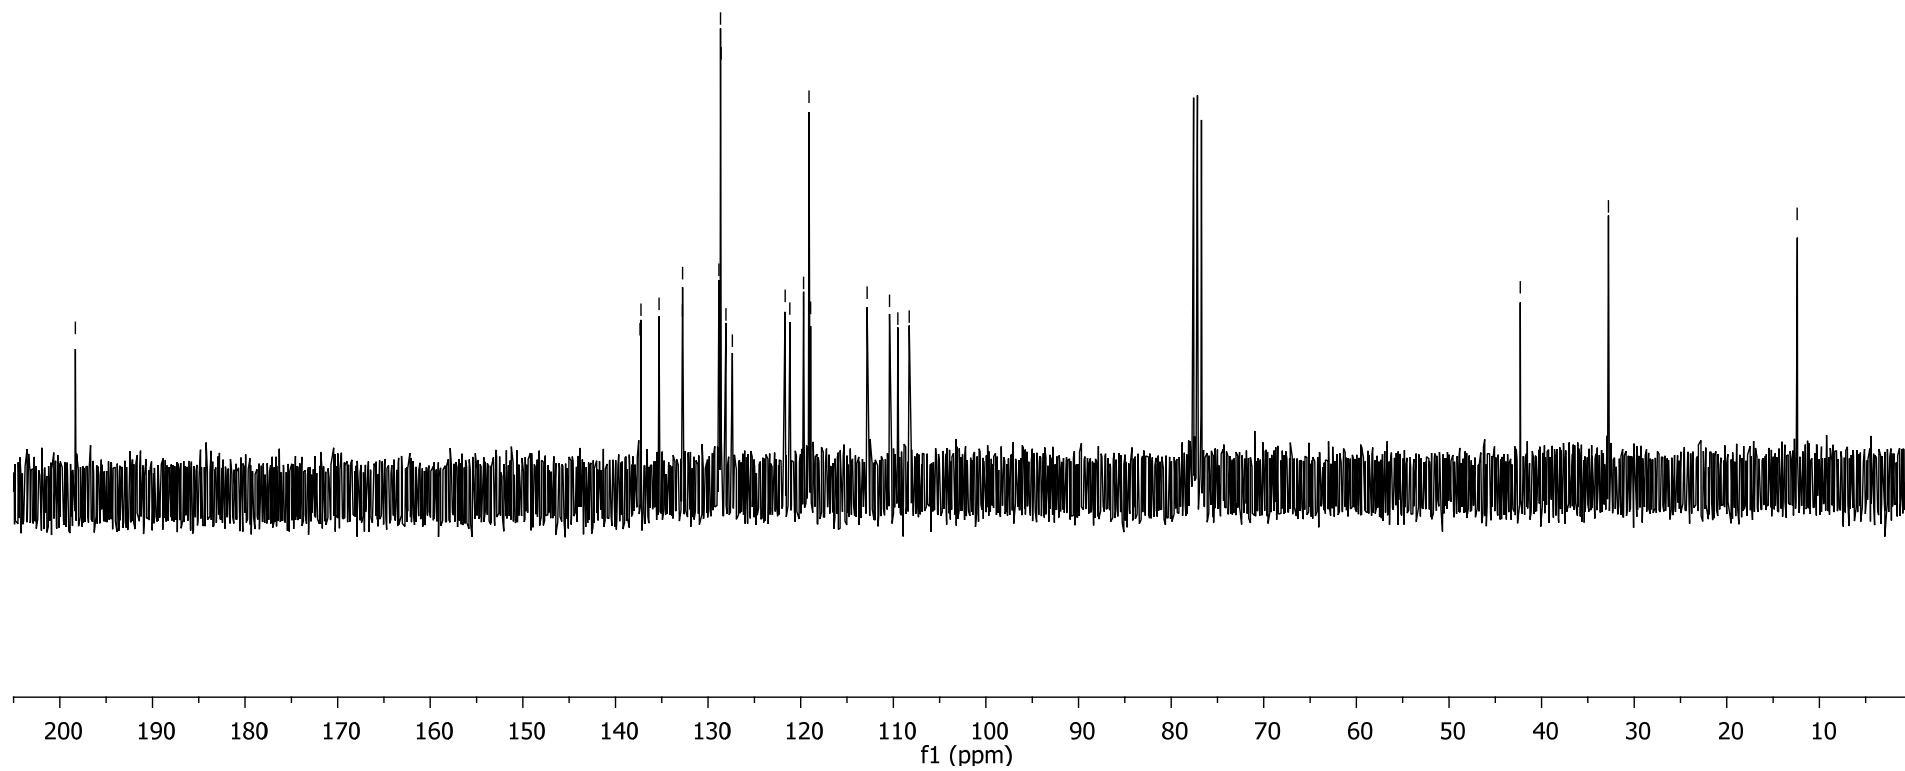

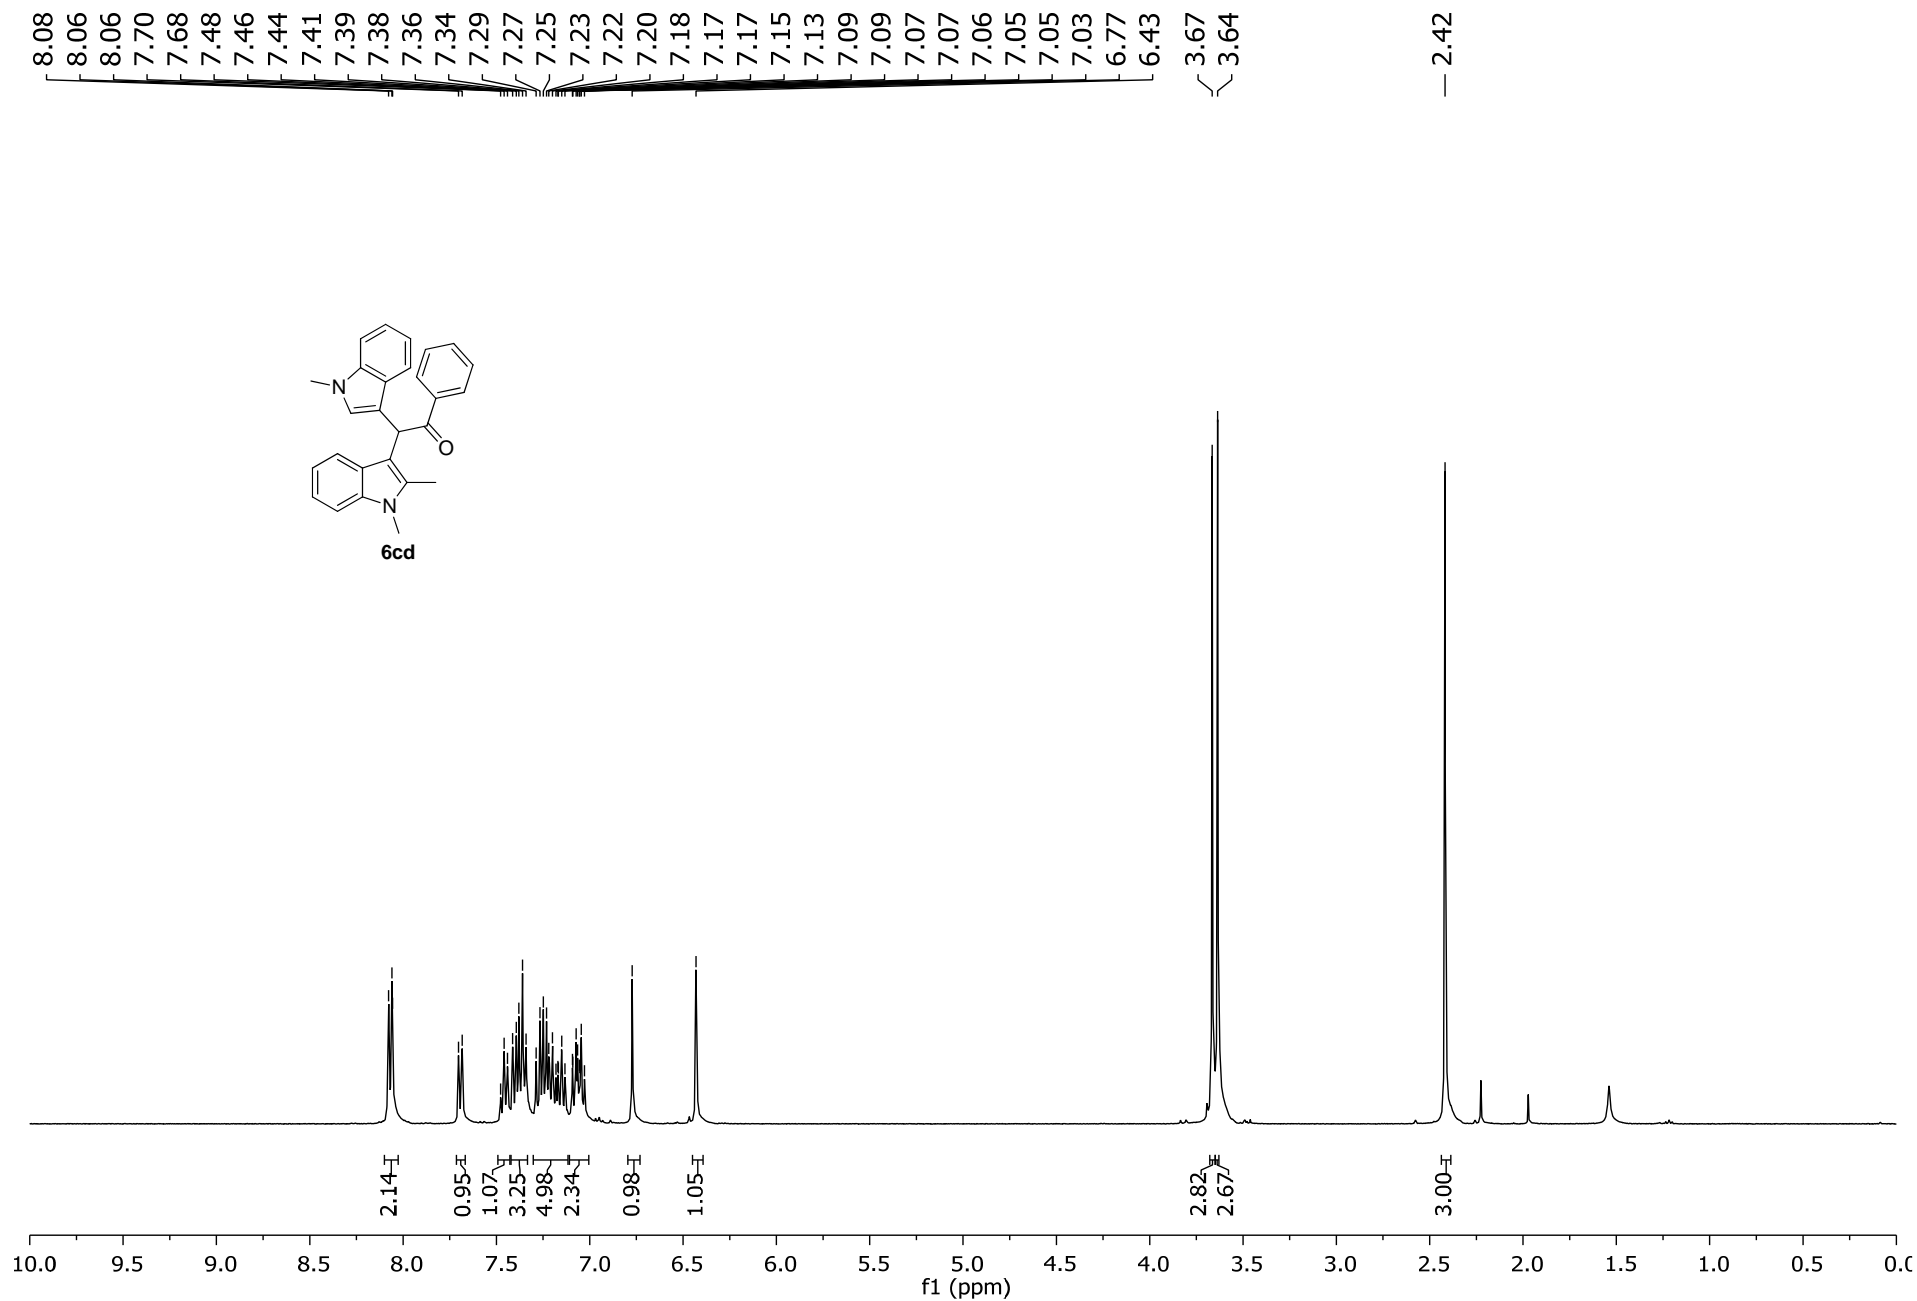

— 198.1

137.4  
136.9  
134.5  
132.7  
128.9  
128.7  
128.6  
127.5  
127.2  
121.7  
120.8  
119.4  
119.2  
119.1  
119.1  
113.2  
109.5  
108.8  
107.7

— 42.6

— 32.9

— 29.7

— 11.0

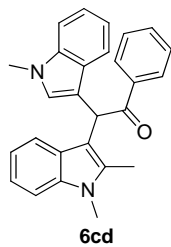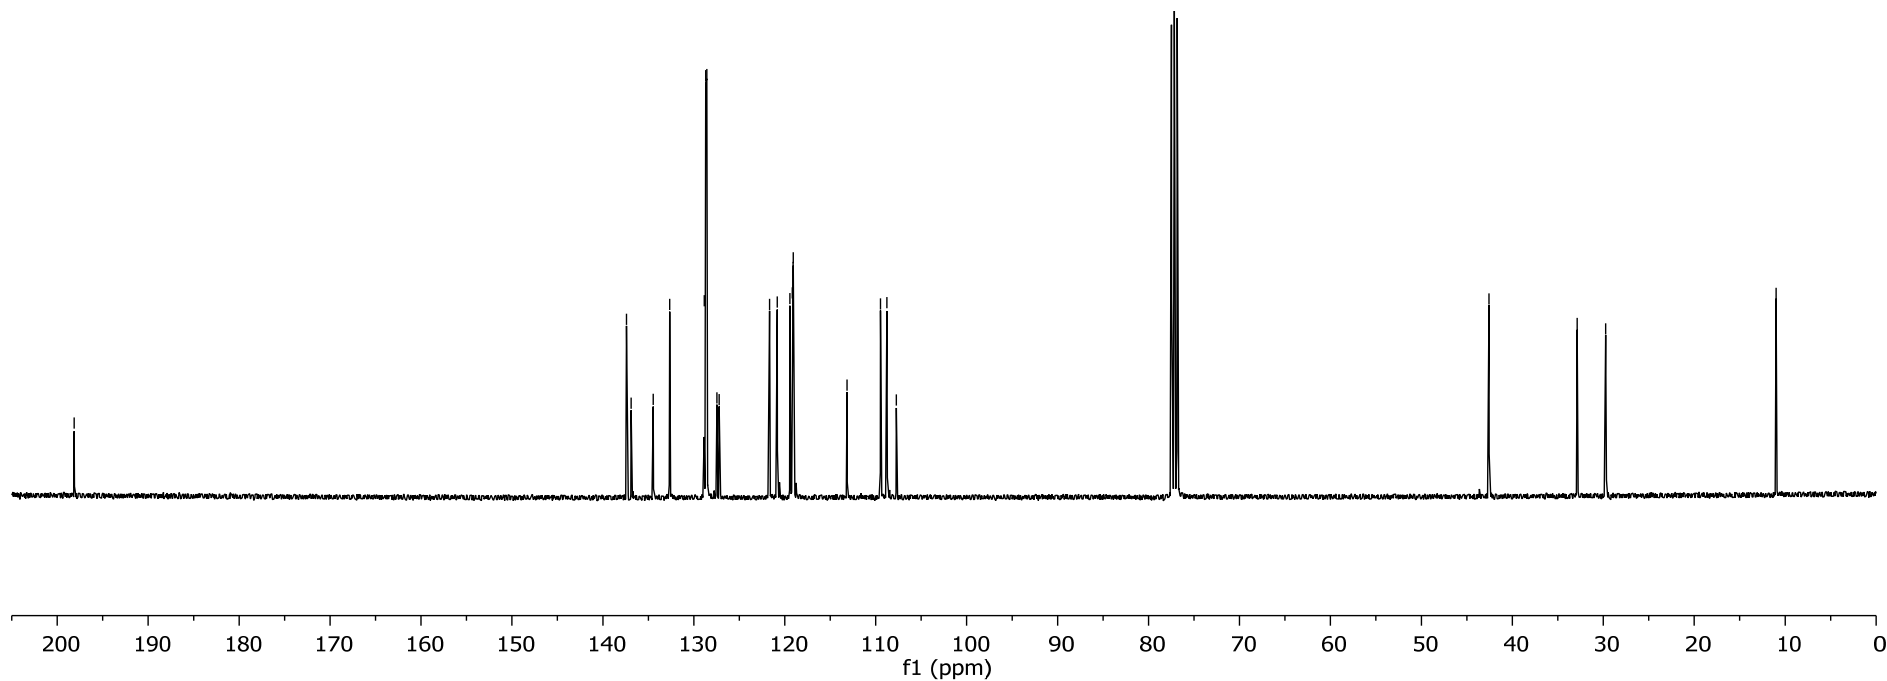

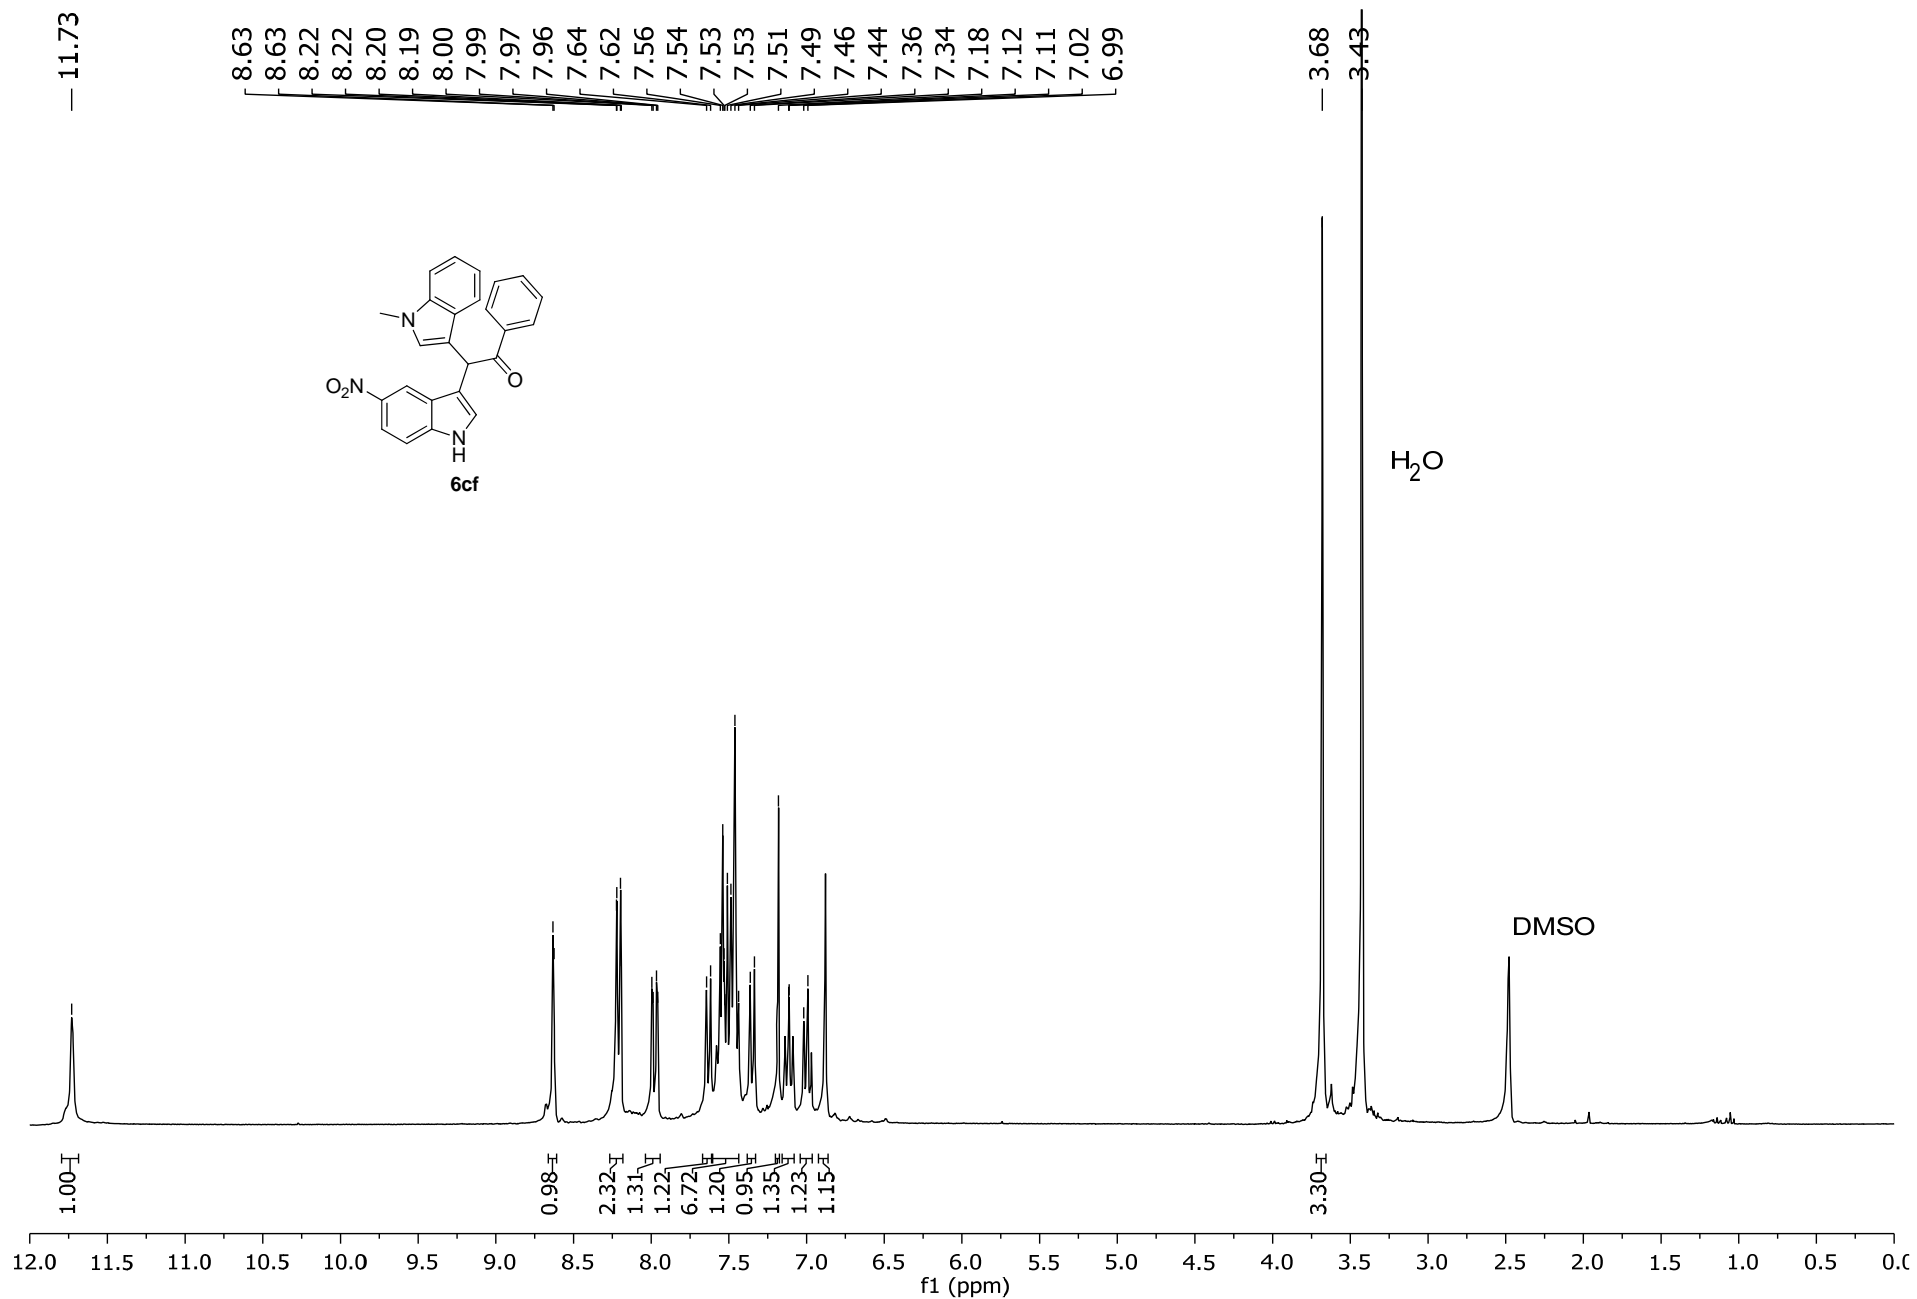



— 197.8

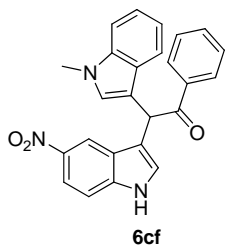

140.4  
139.6  
136.8  
136.2  
133.2  
128.8  
128.6  
128.5  
126.6  
125.9  
121.4  
119.2  
118.9  
116.6  
116.1  
112.1  
111.7  
109.9

— 41.1

— 32.4

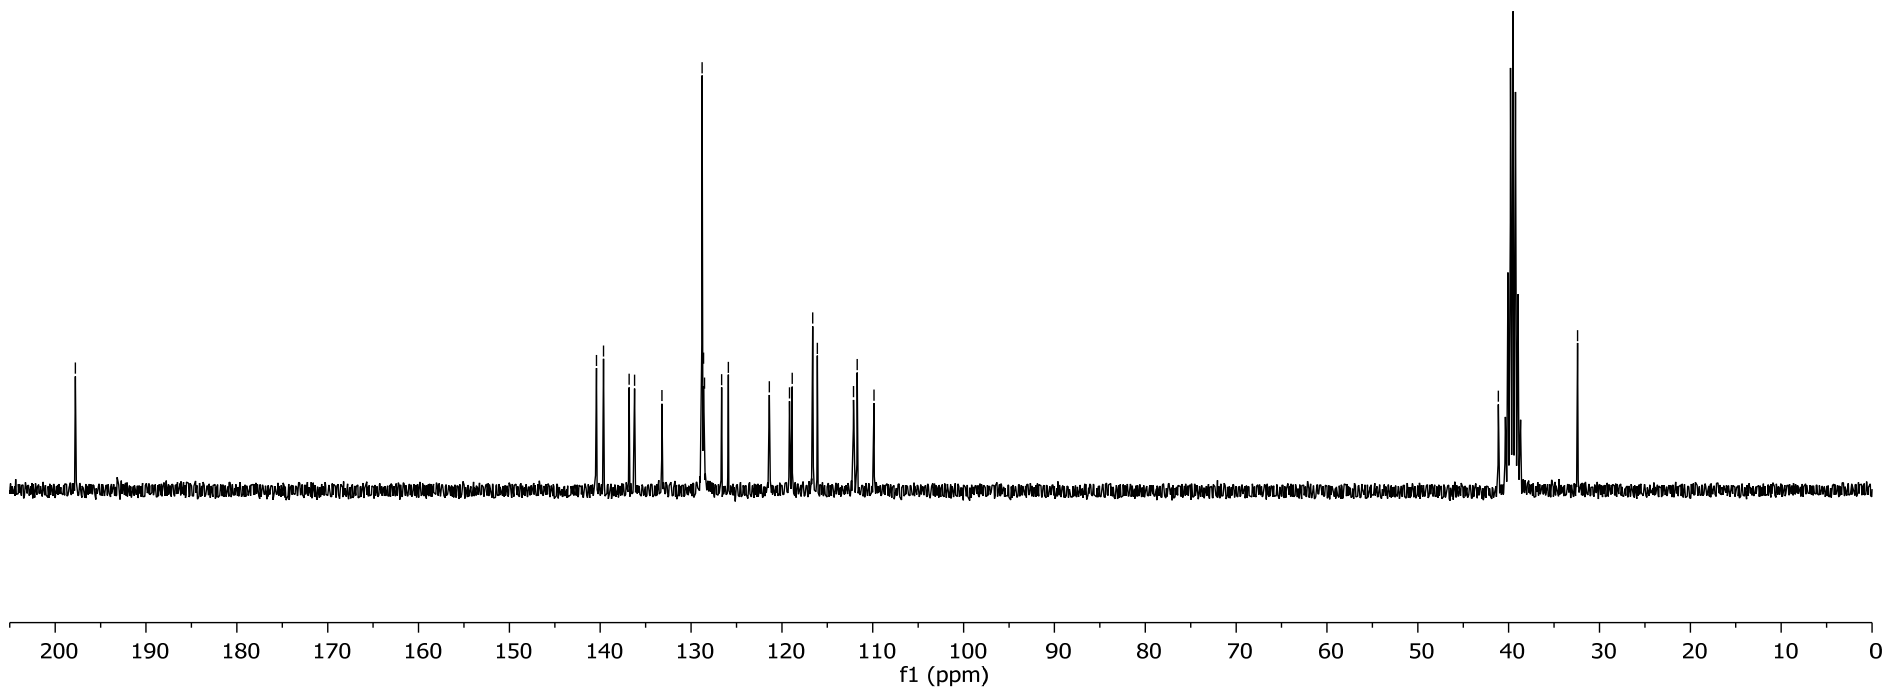

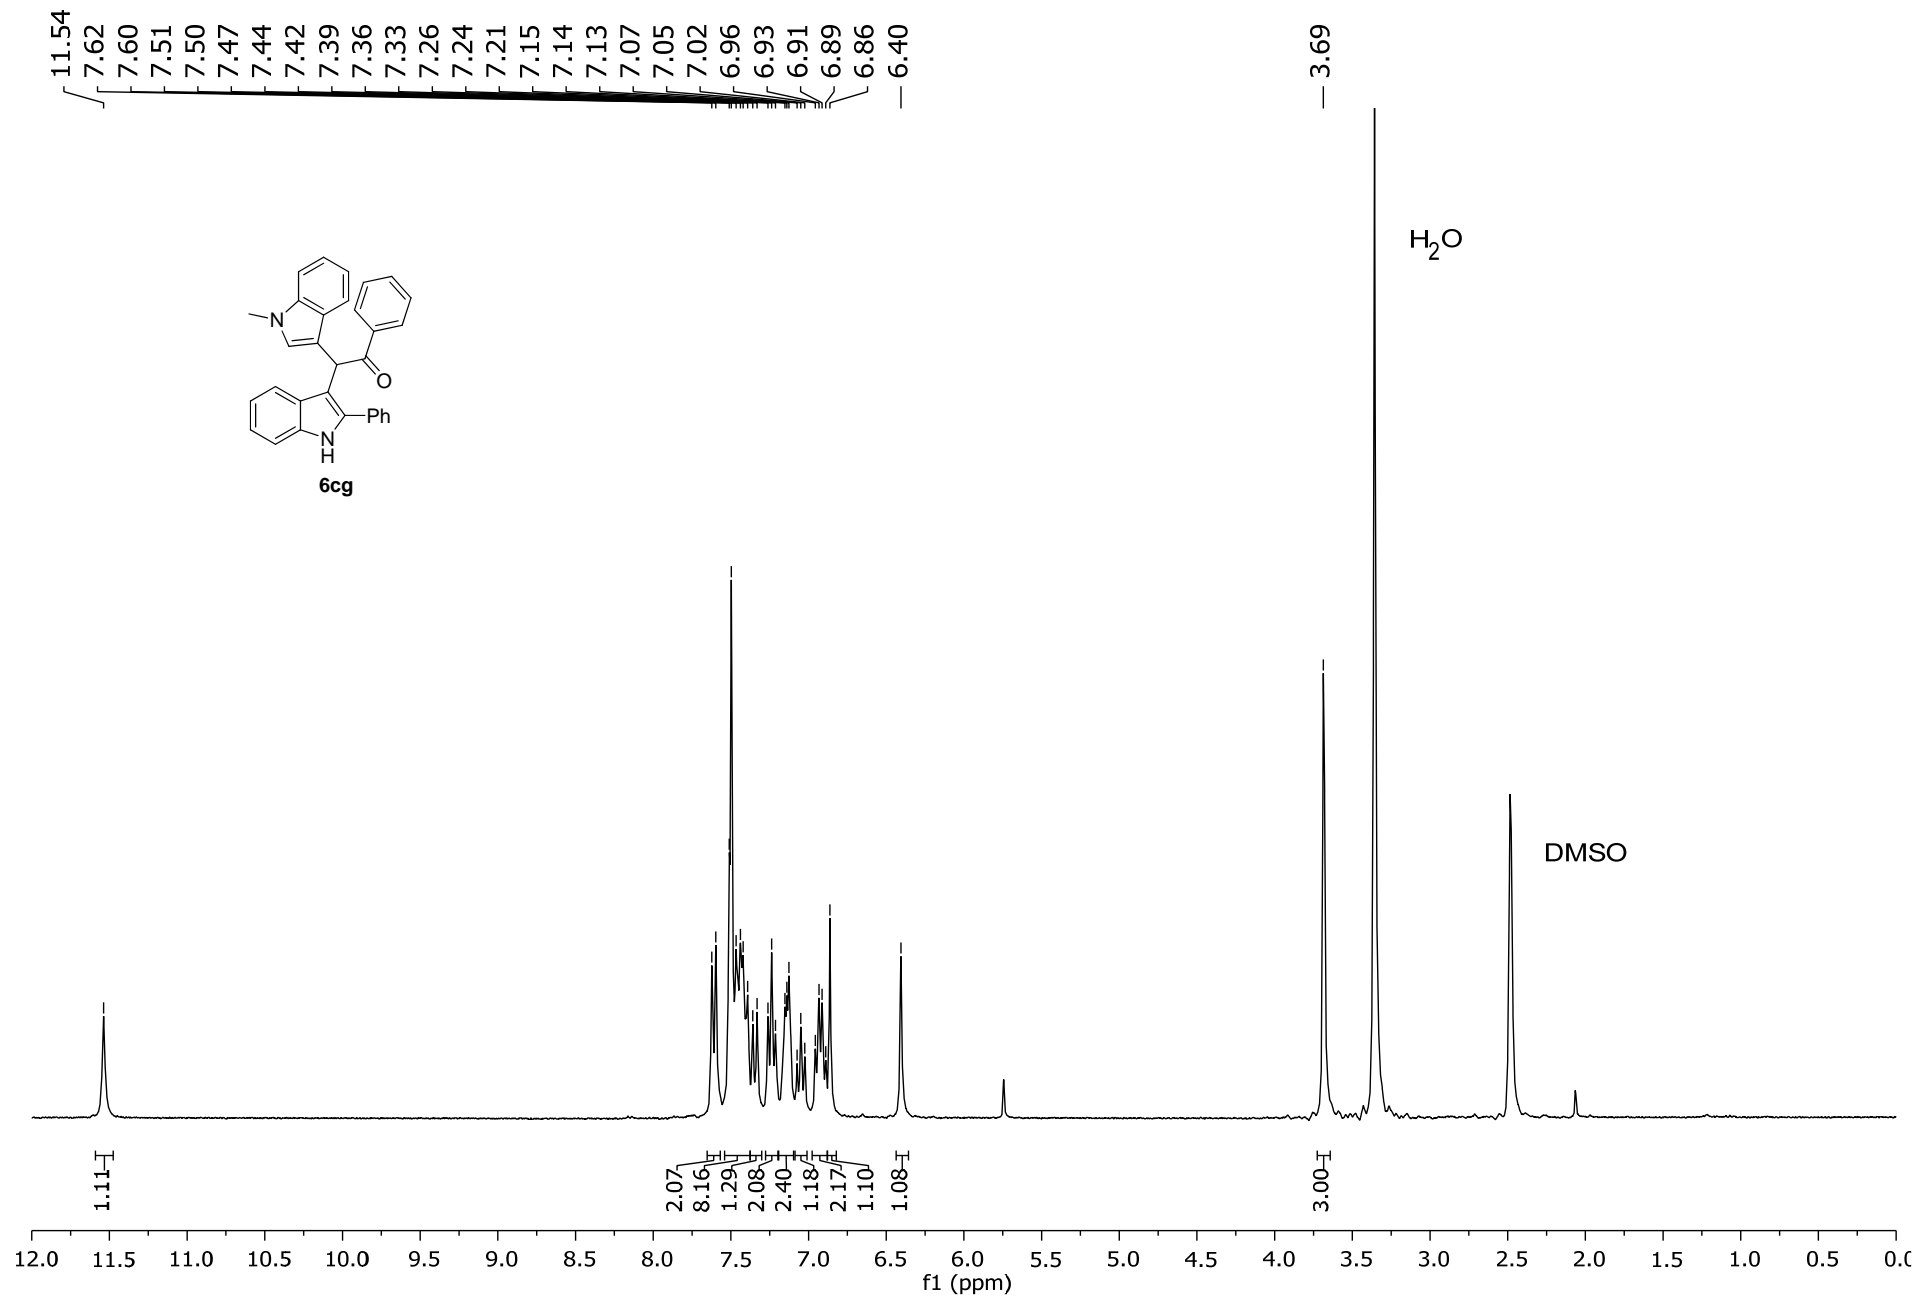

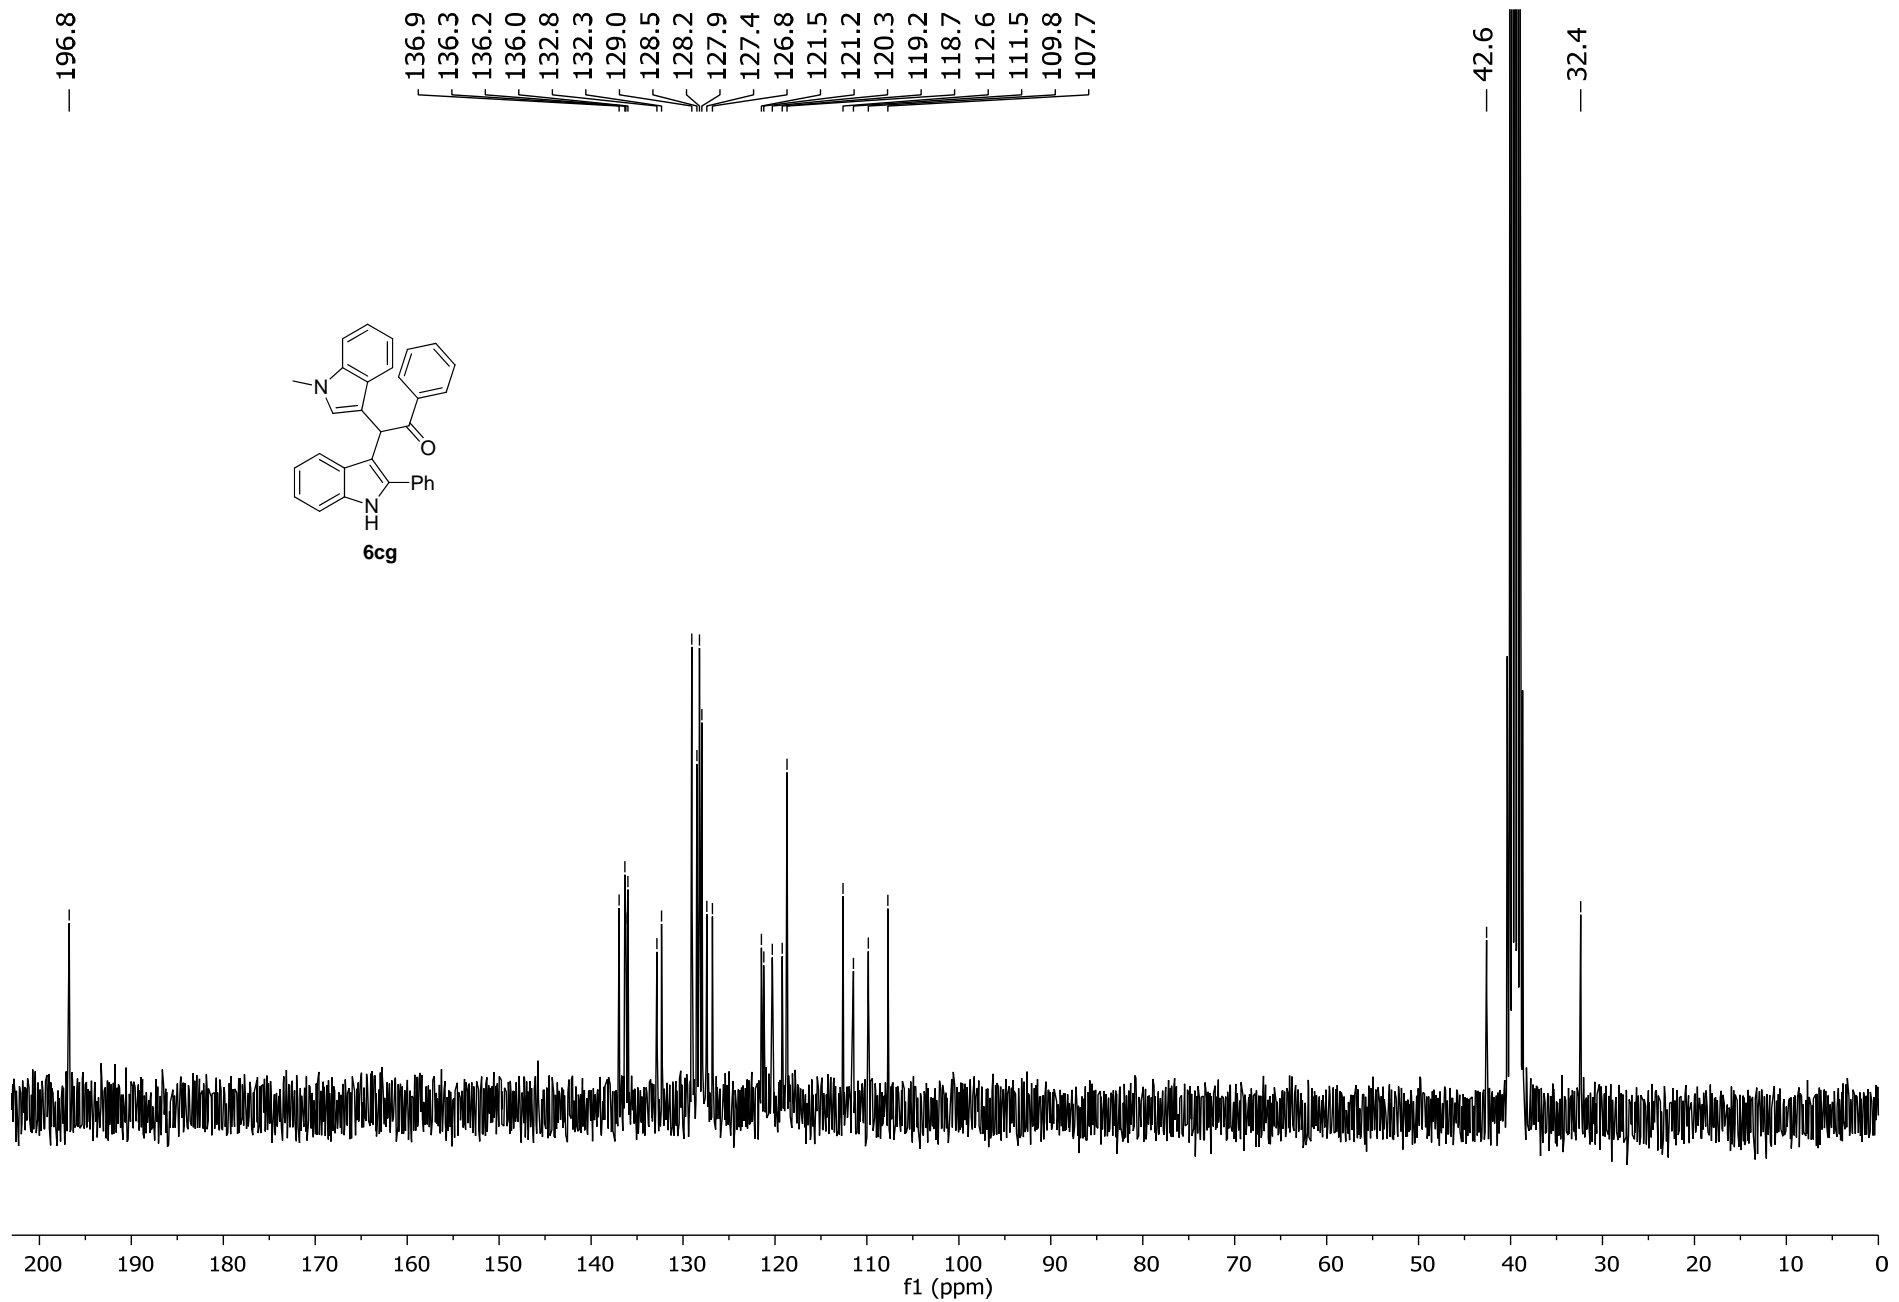

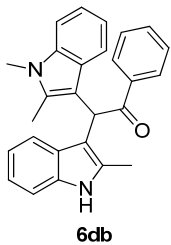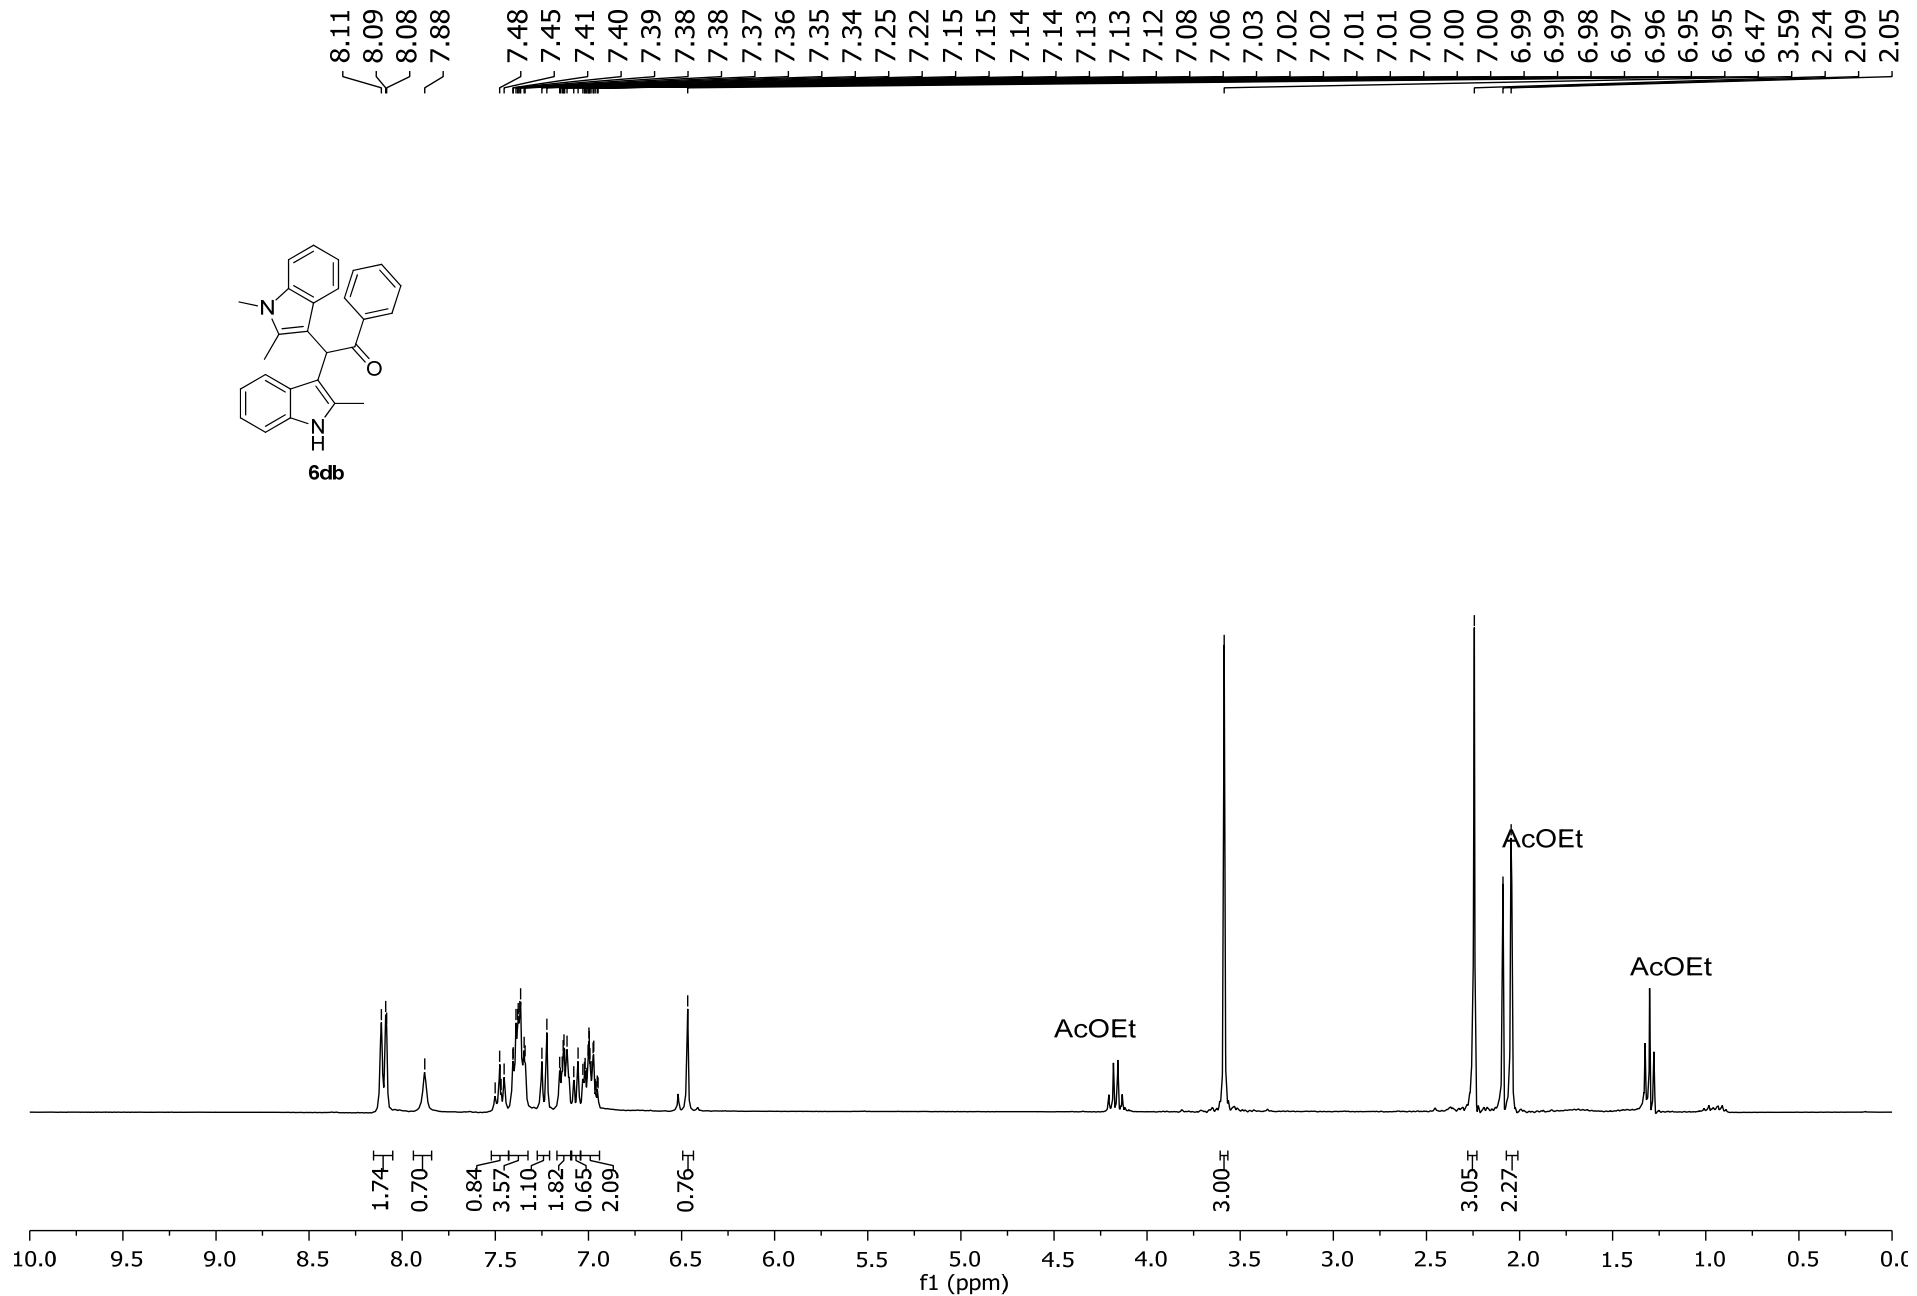

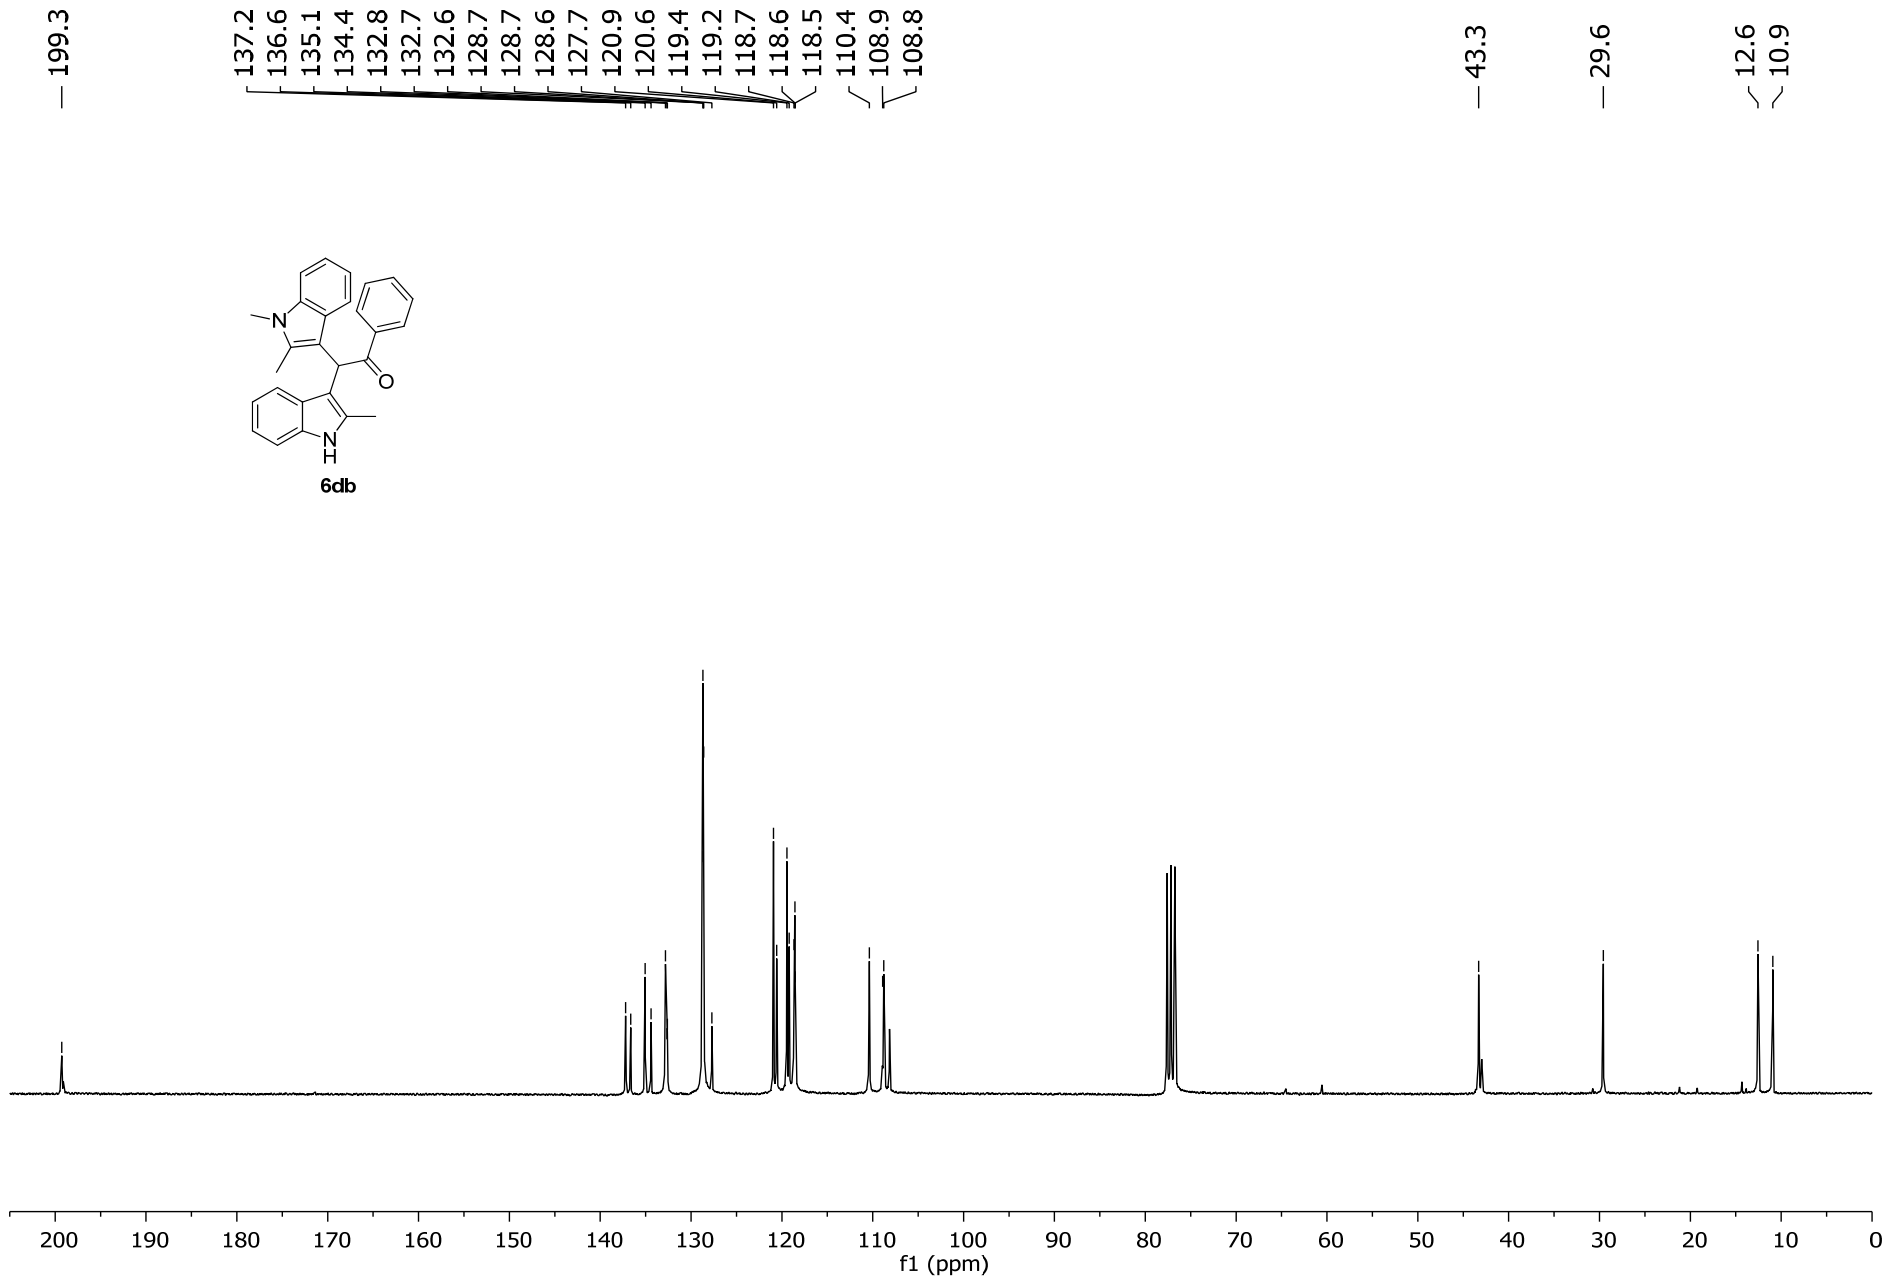

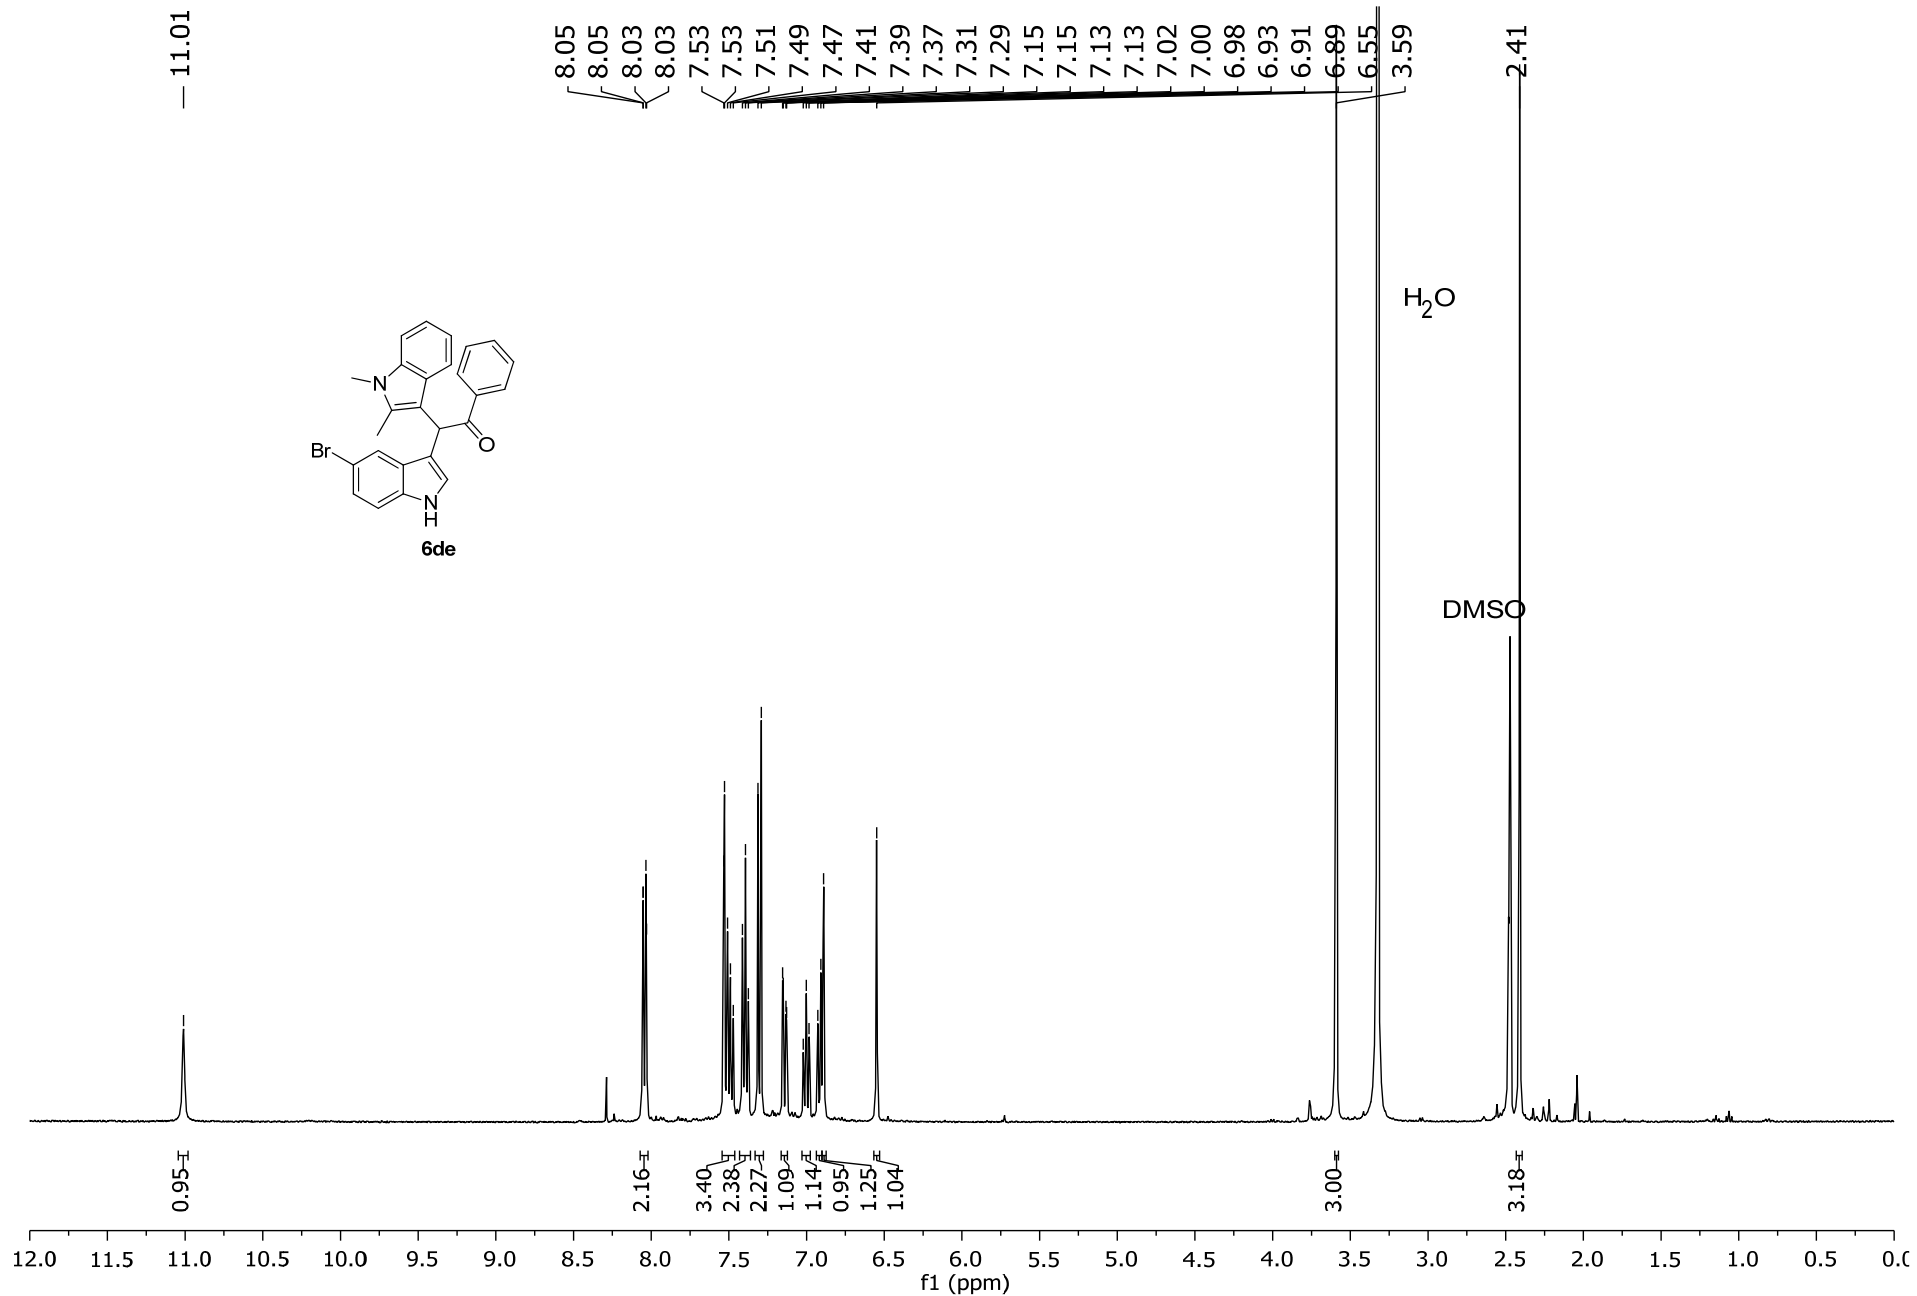

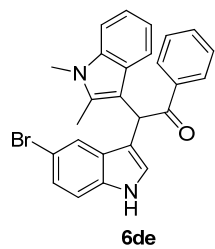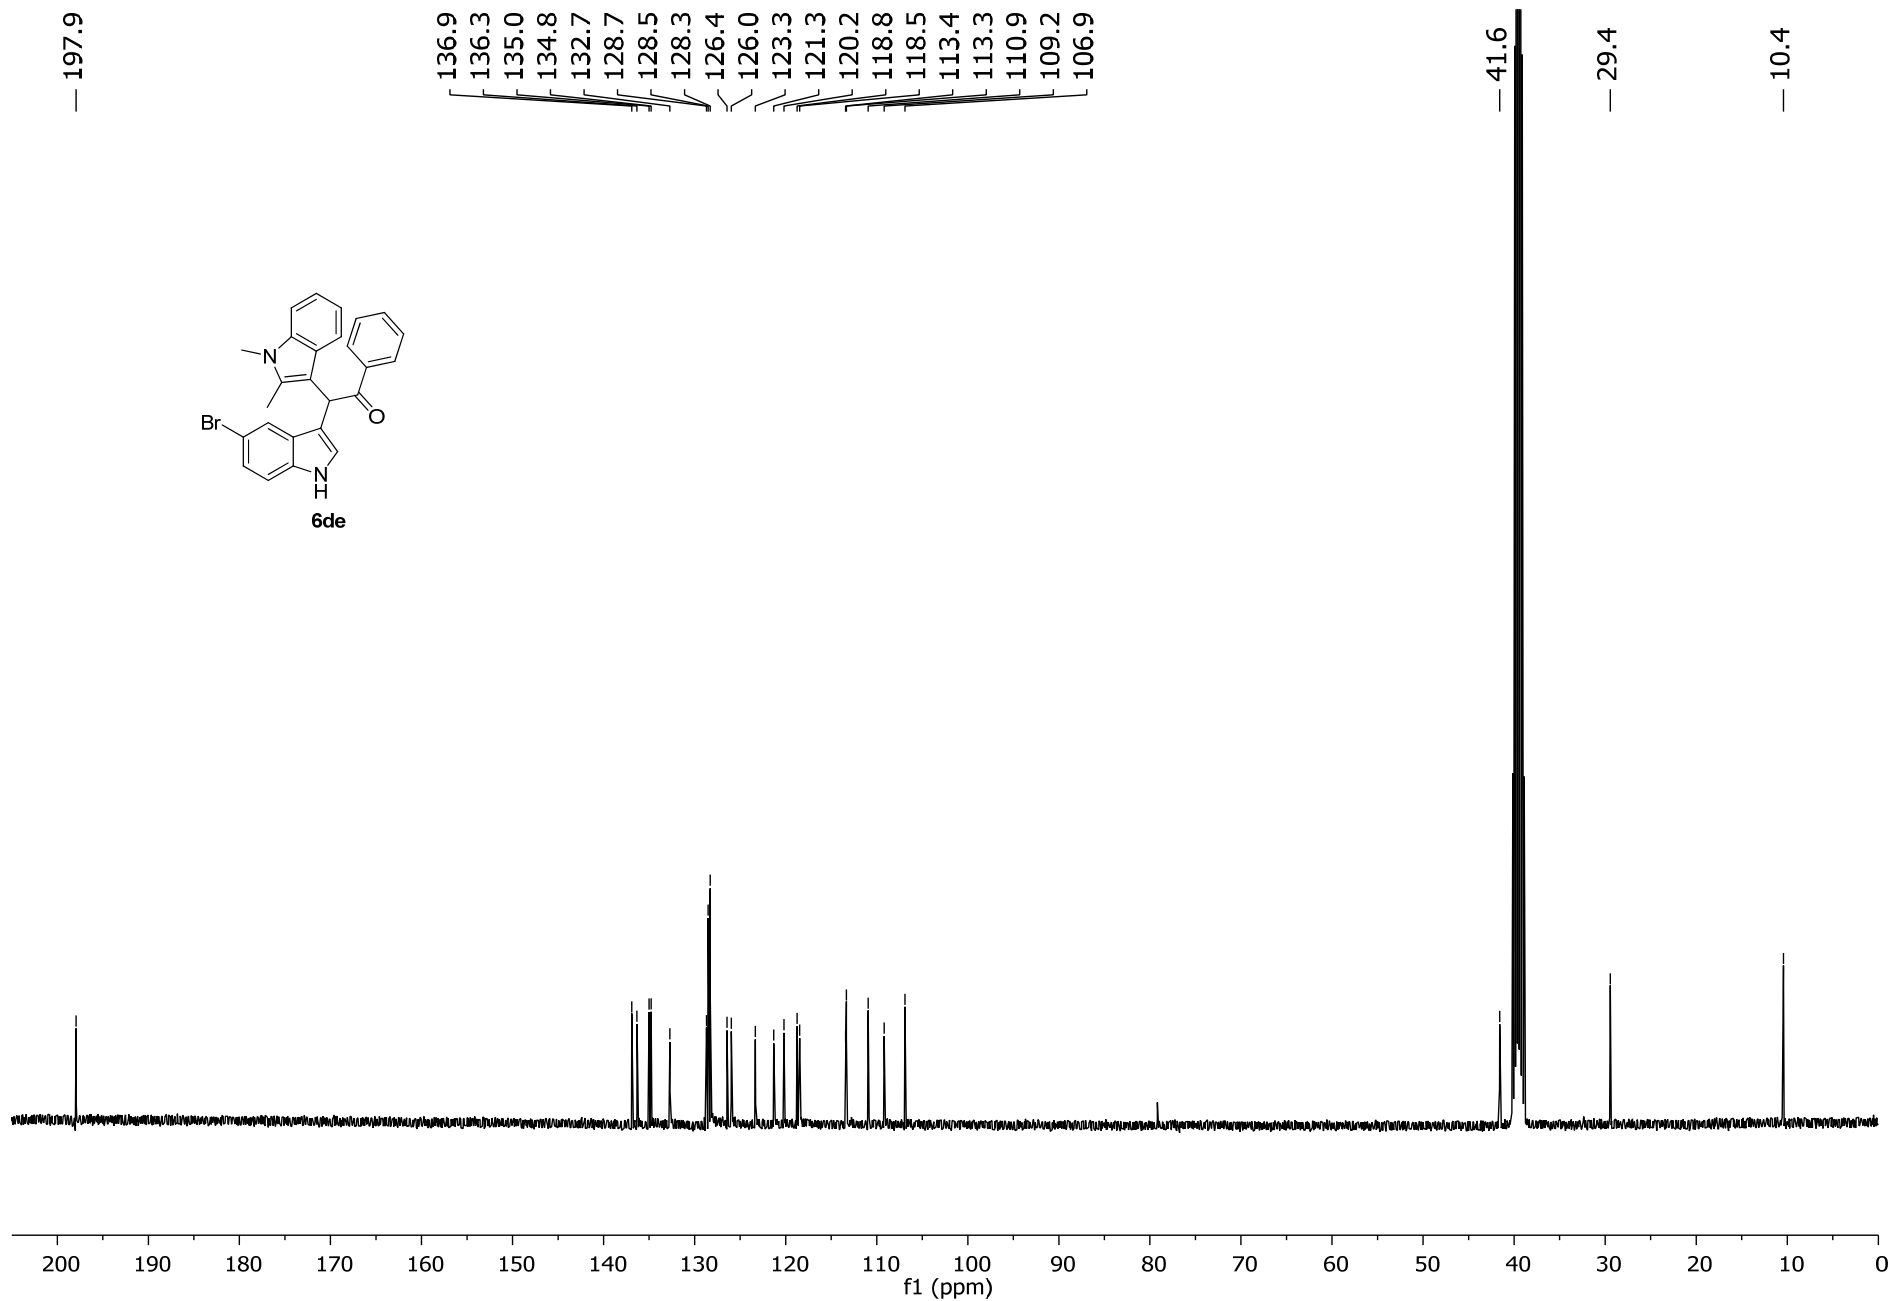

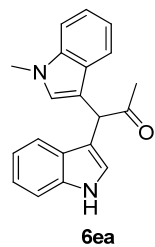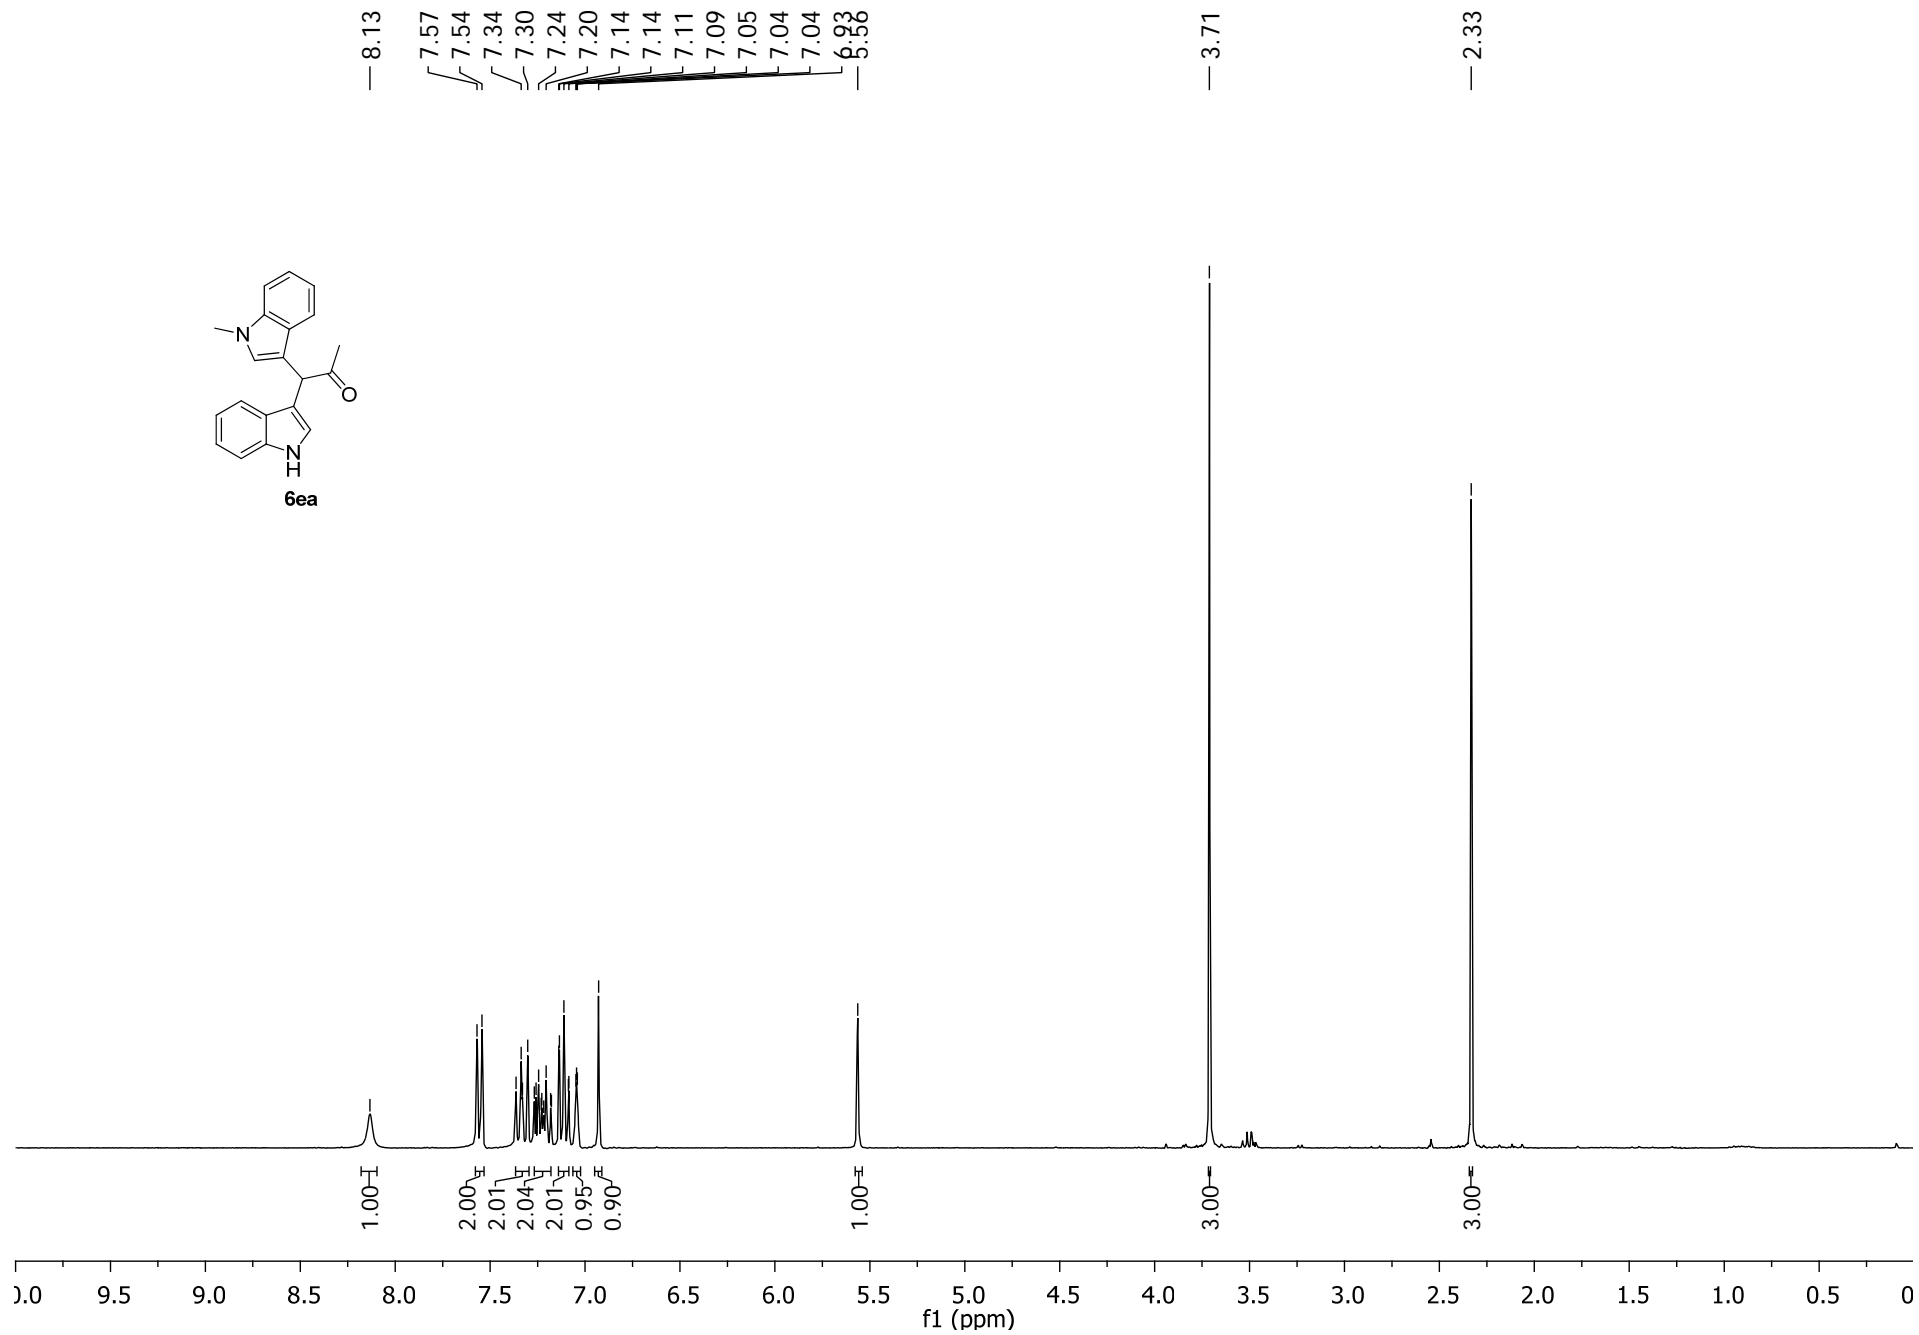



— 207.6

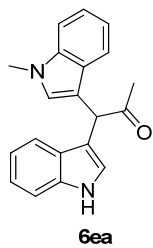

137.2  
136.5  
128.2  
127.3  
126.8  
123.5  
122.3  
121.9  
119.7  
119.3  
119.3  
119.2  
113.4  
111.9  
111.5  
109.5

— 48.1

— 32.8  
— 29.0

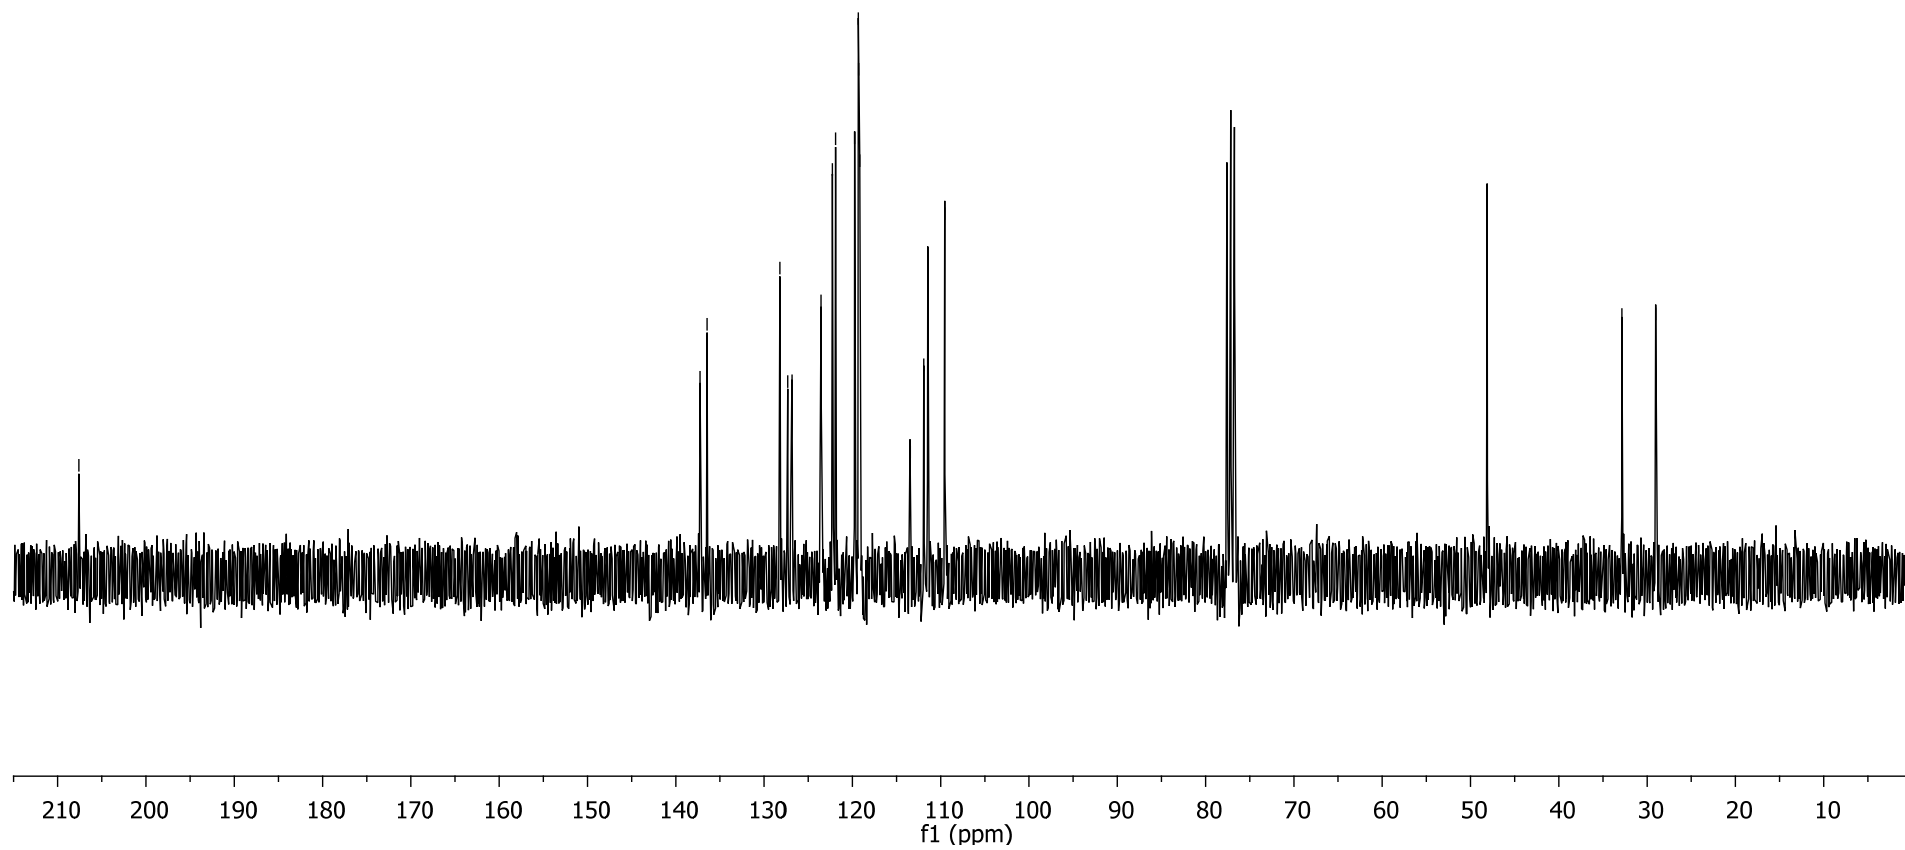

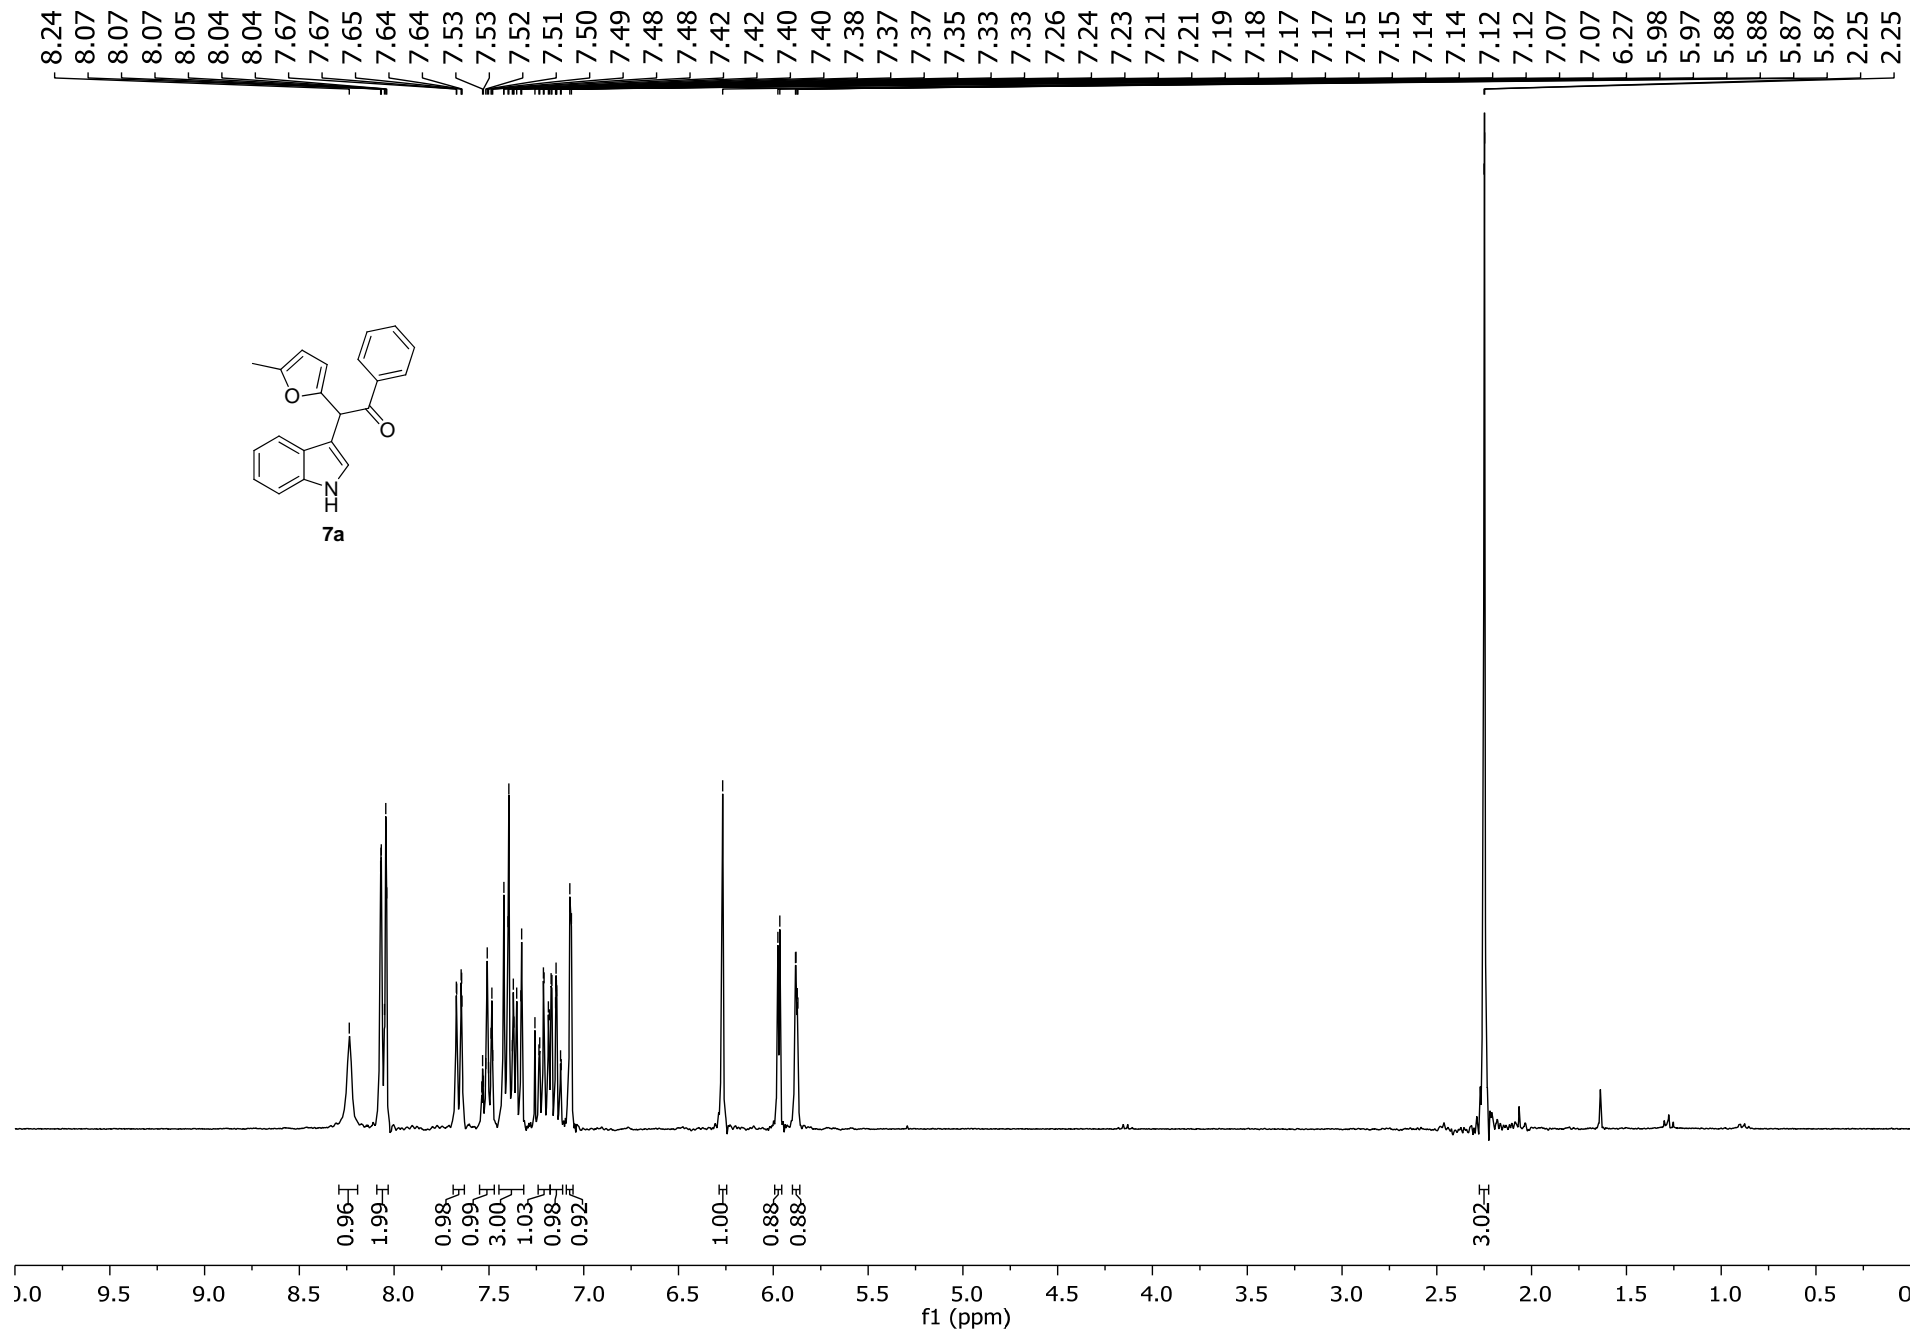

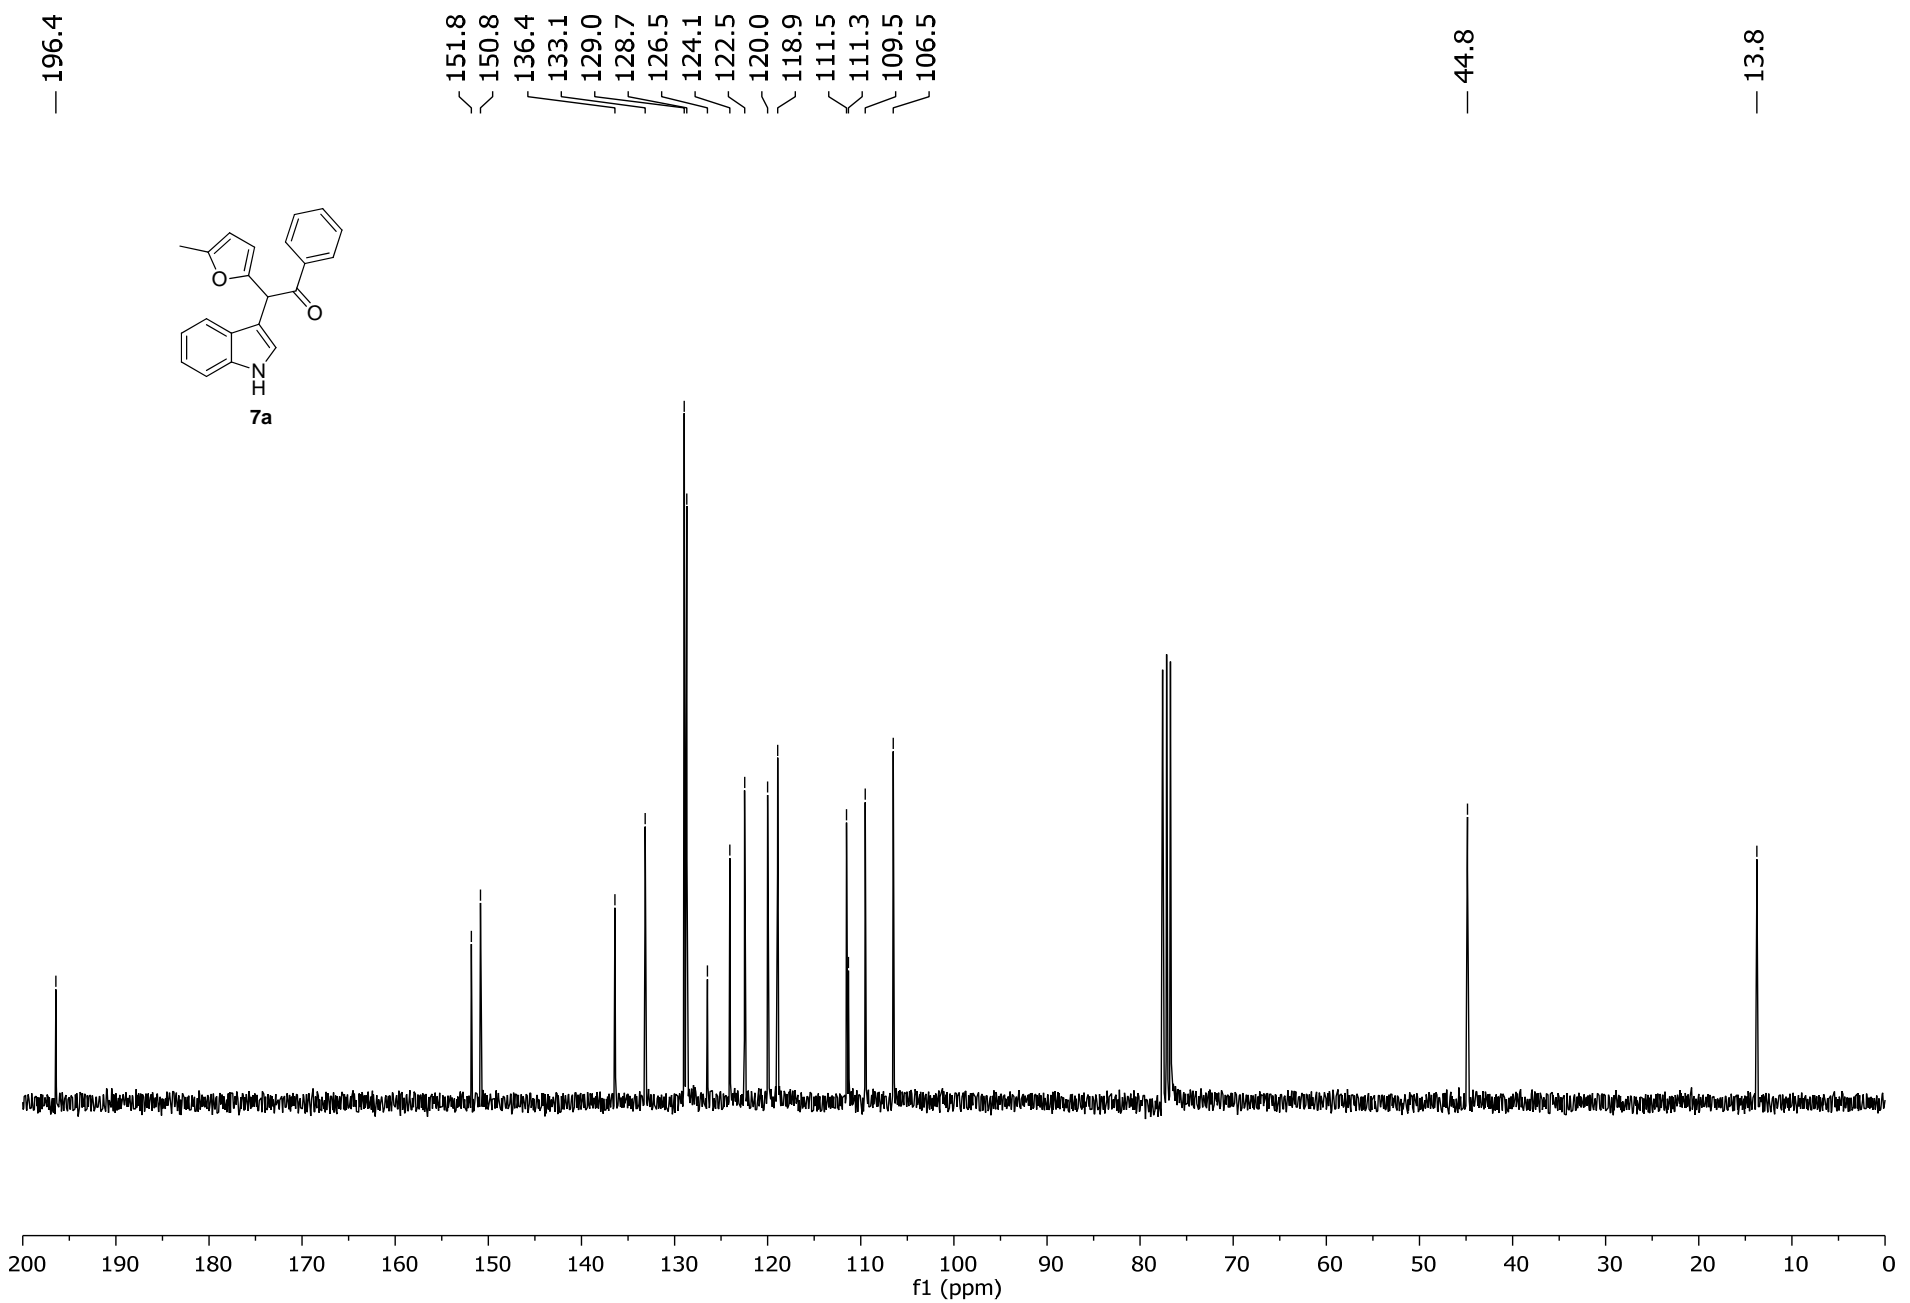

8.02  
8.00  
7.99  
7.97  
7.67  
7.64  
7.48  
7.46  
7.39  
7.37  
7.34  
7.34  
7.30  
7.30  
7.30  
7.16  
7.15  
7.14  
7.13  
7.12  
6.15  
5.95  
5.94  
5.91  
5.90  
5.90

2.42  
2.30

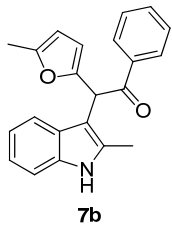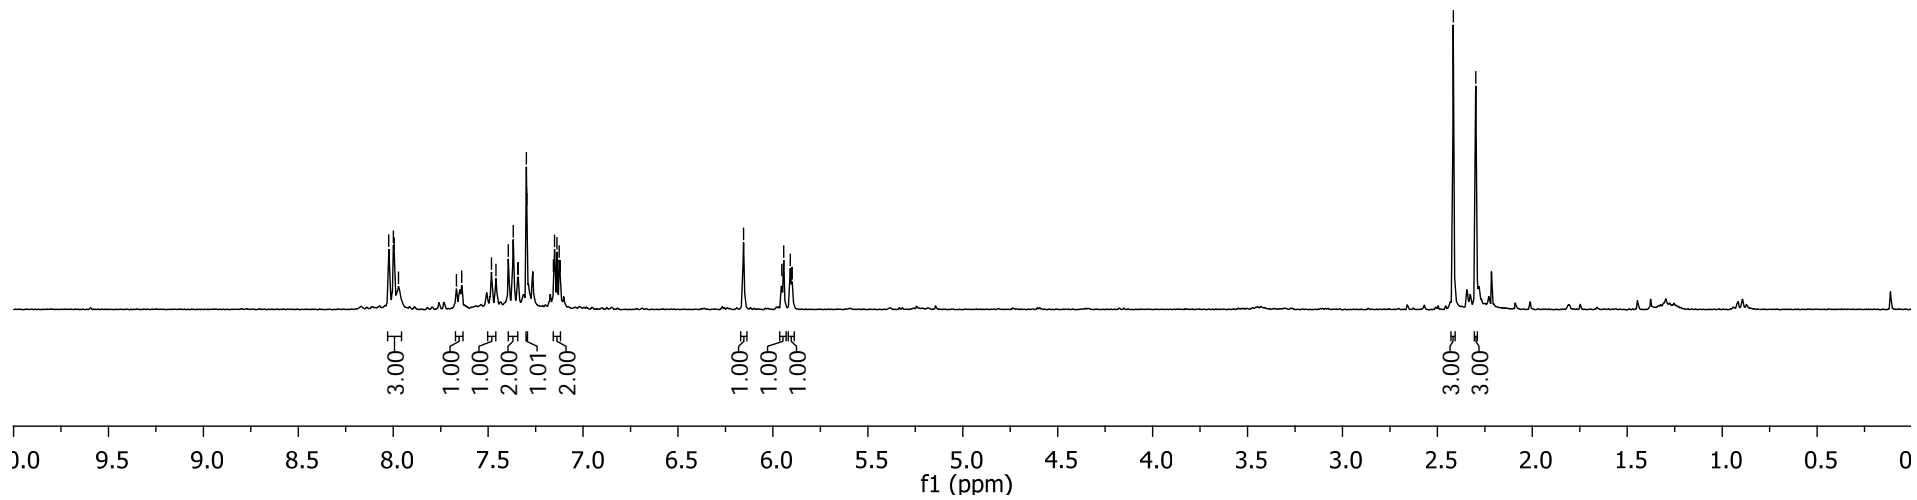

— 196.4

151.7  
150.6  
136.6  
135.3  
133.2  
132.9  
128.6  
128.5  
127.8  
121.4  
119.9  
118.6  
110.5  
109.6  
106.3  
106.2

— 45.0

13.7  
12.4

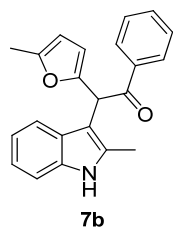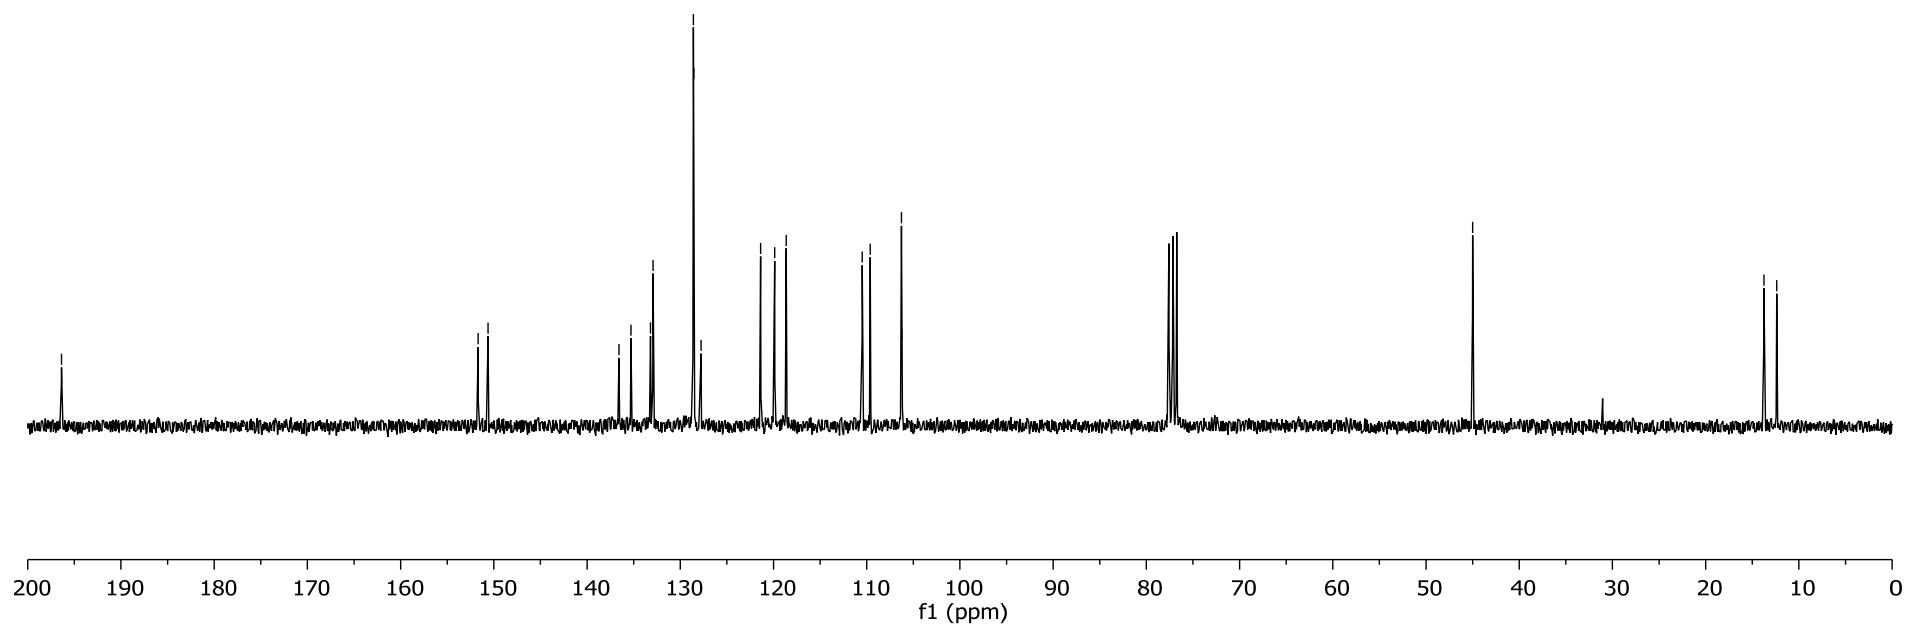

8.02  
8.00  
7.99  
7.97  
7.67  
7.64  
7.48  
7.46  
7.39  
7.37  
7.34  
7.34  
7.30  
7.30  
7.30  
7.16  
7.15  
7.14  
7.13  
7.12  
6.15  
5.95  
5.94  
5.91  
5.90  
5.90

2.42  
2.30

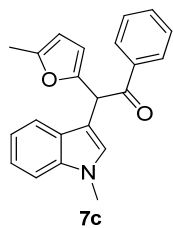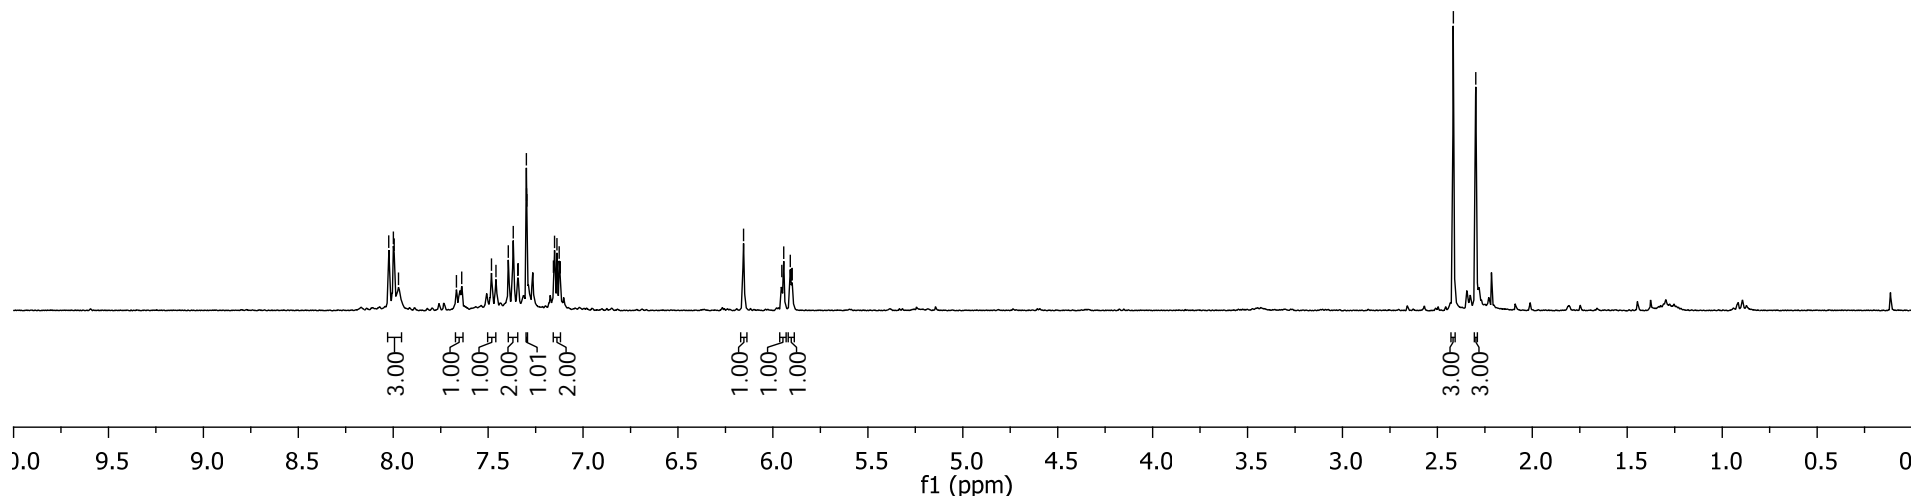

— 196.2

151.7  
151.1  
137.2  
136.4  
133.1  
128.9  
128.6  
128.5  
126.9  
122.0  
119.5  
119.0  
109.7  
109.5  
109.4  
106.5

— 44.6

— 32.9

— 13.8

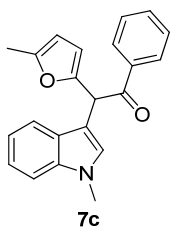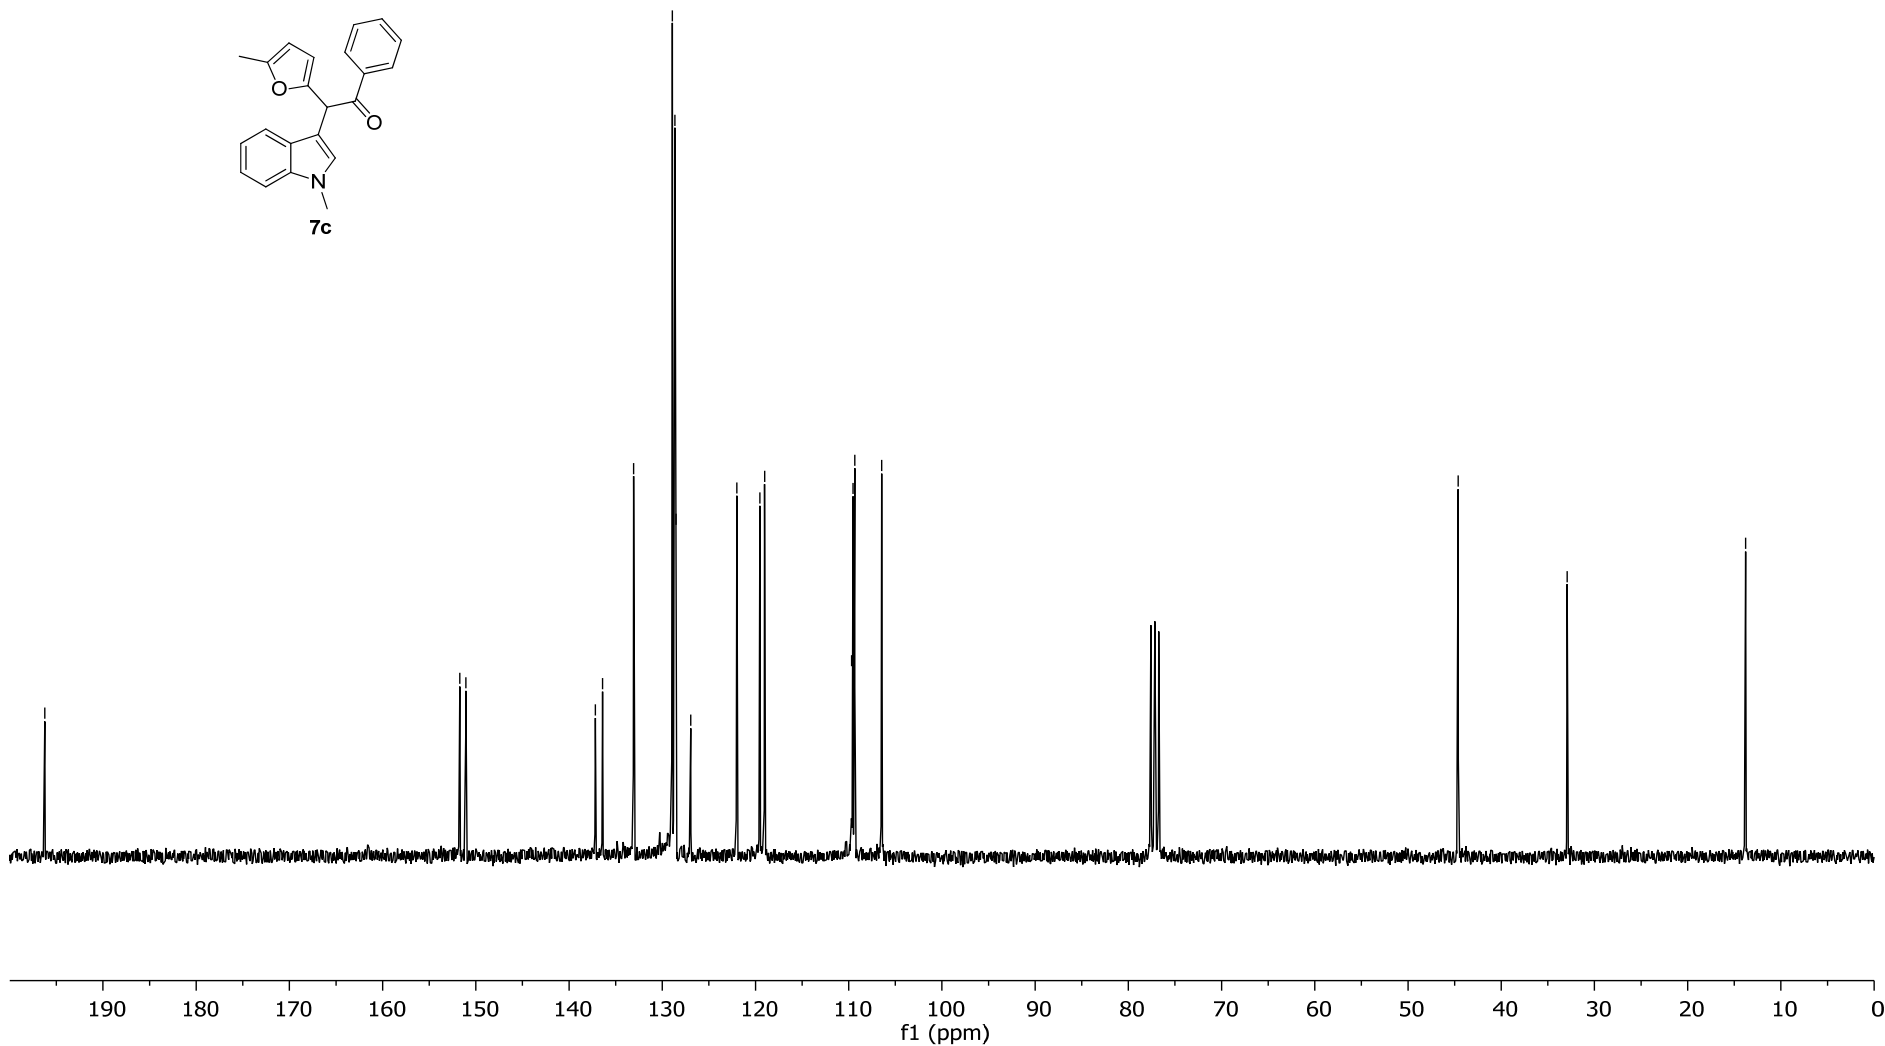

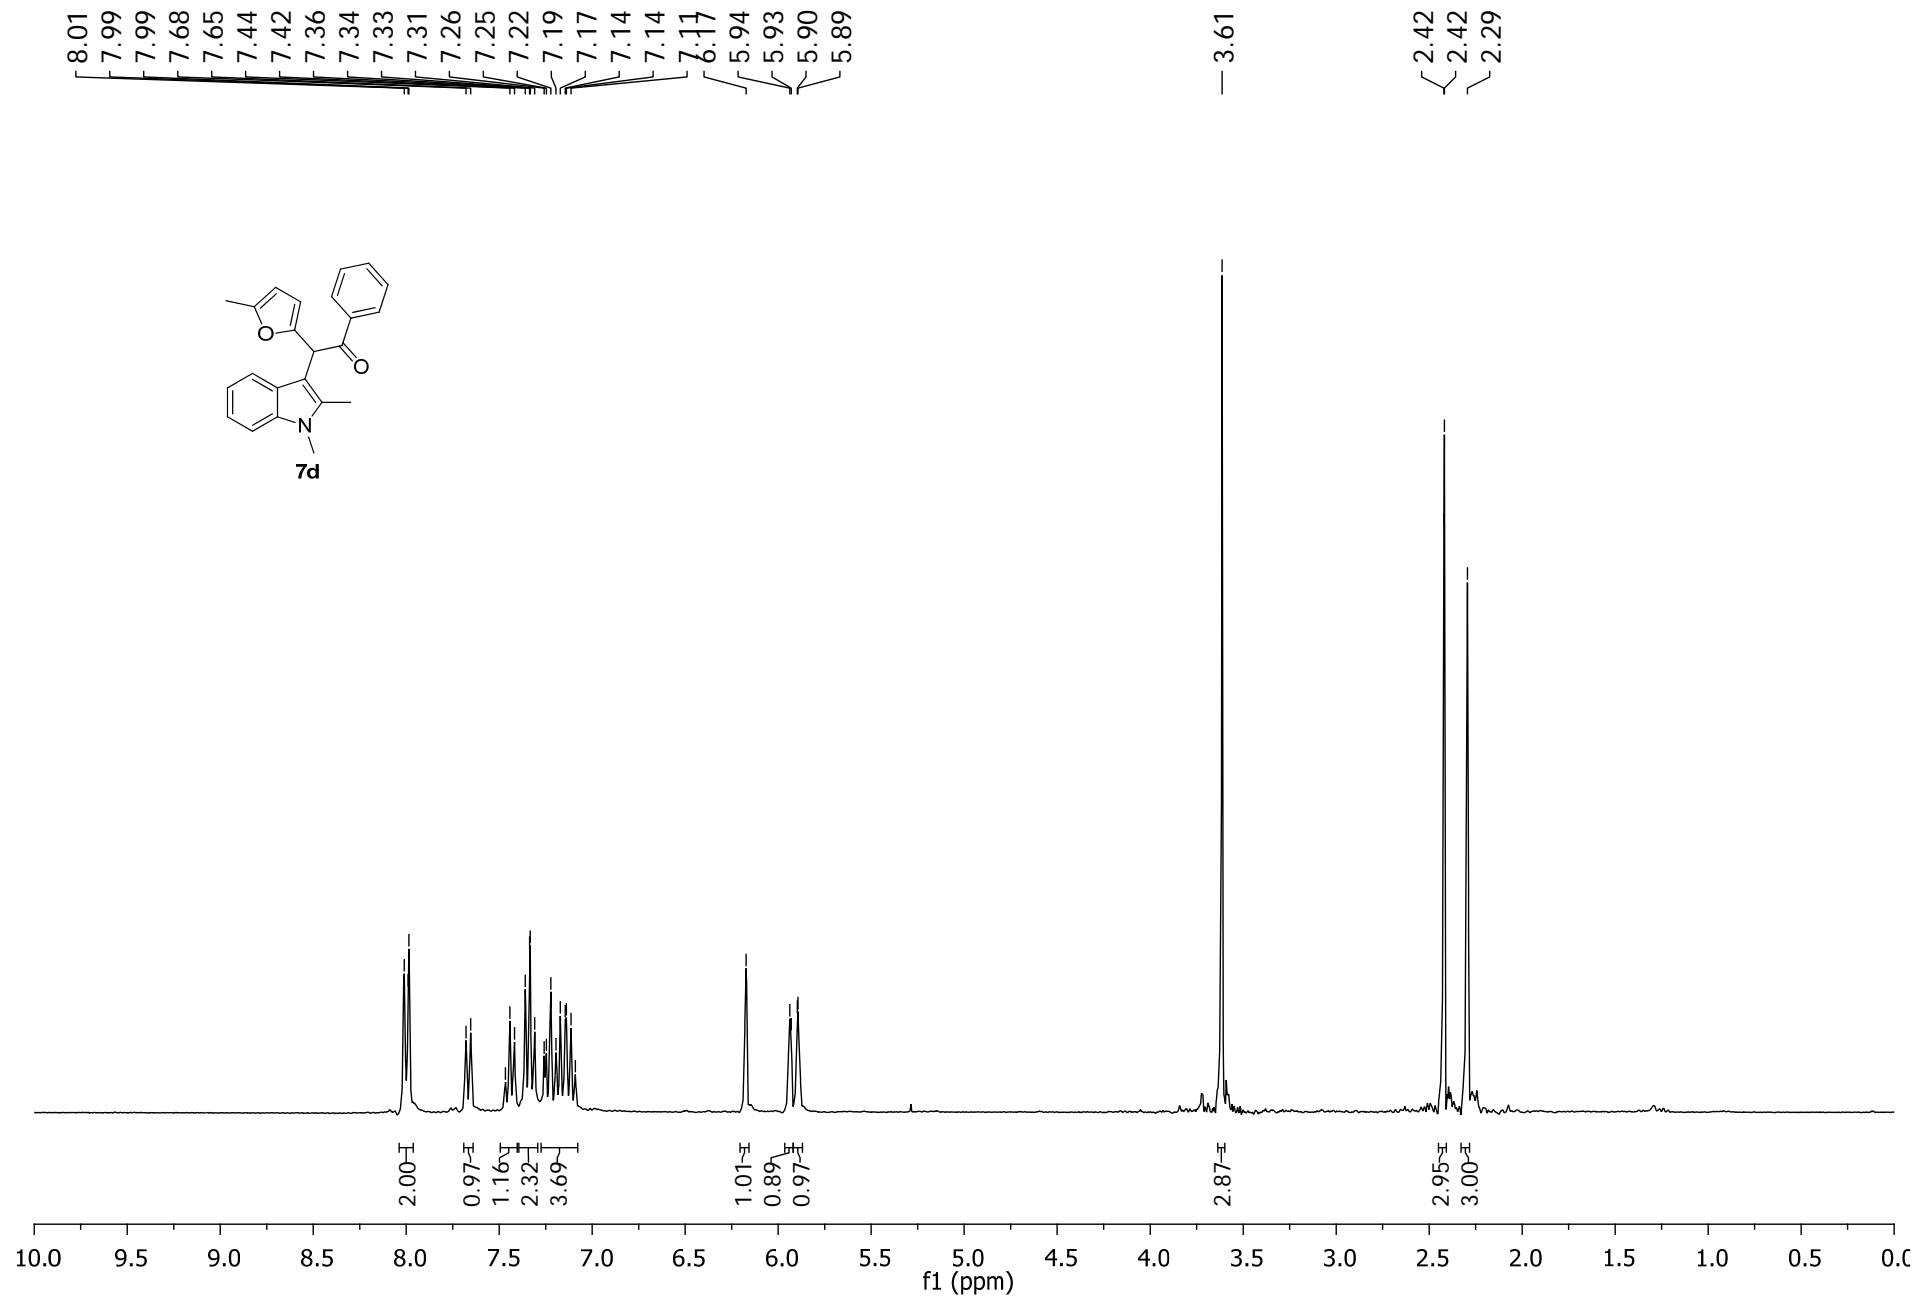



— 196.2

151.6  
150.9  
136.8  
136.6  
134.9  
132.8  
128.6  
128.5  
126.8  
121.0  
119.6  
118.7  
109.6  
108.8  
106.3  
105.6

— 45.2

— 29.7

— 13.8  
— 10.9

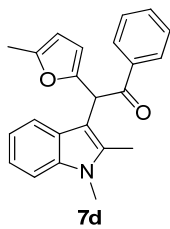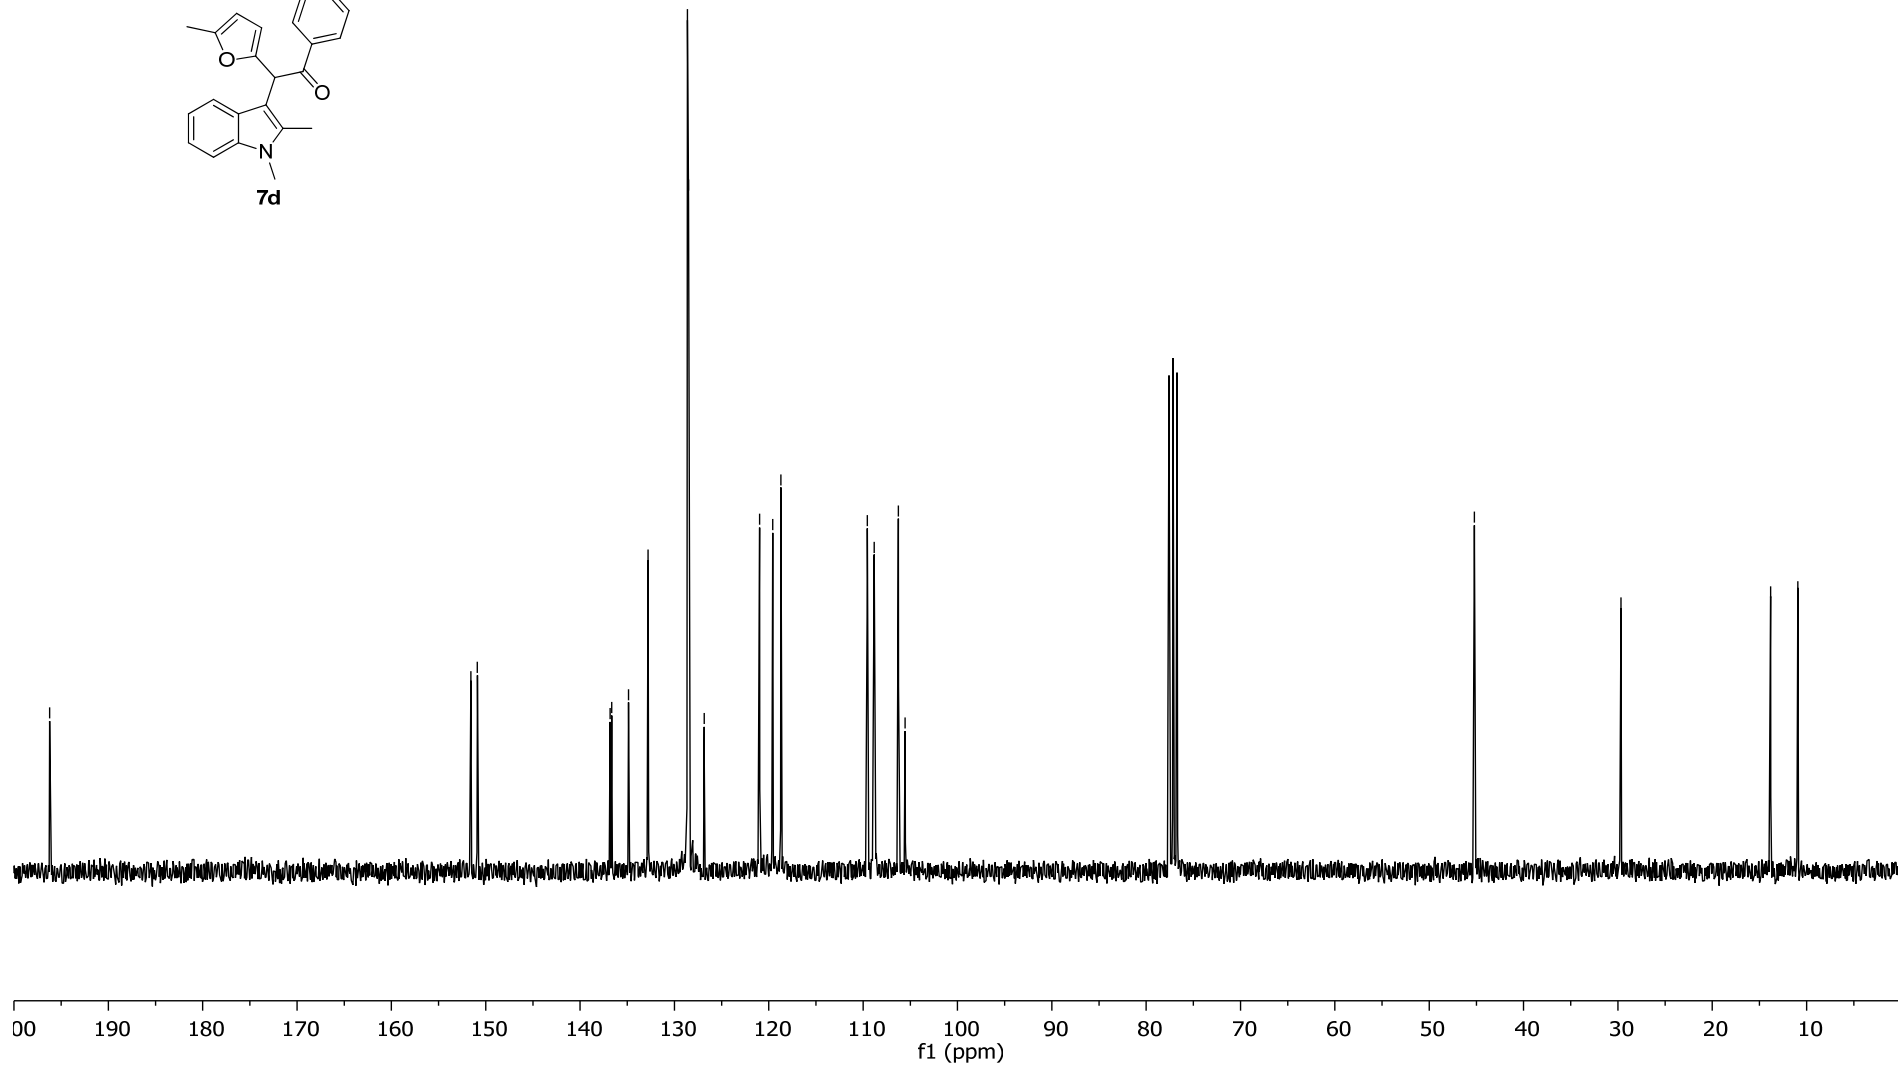

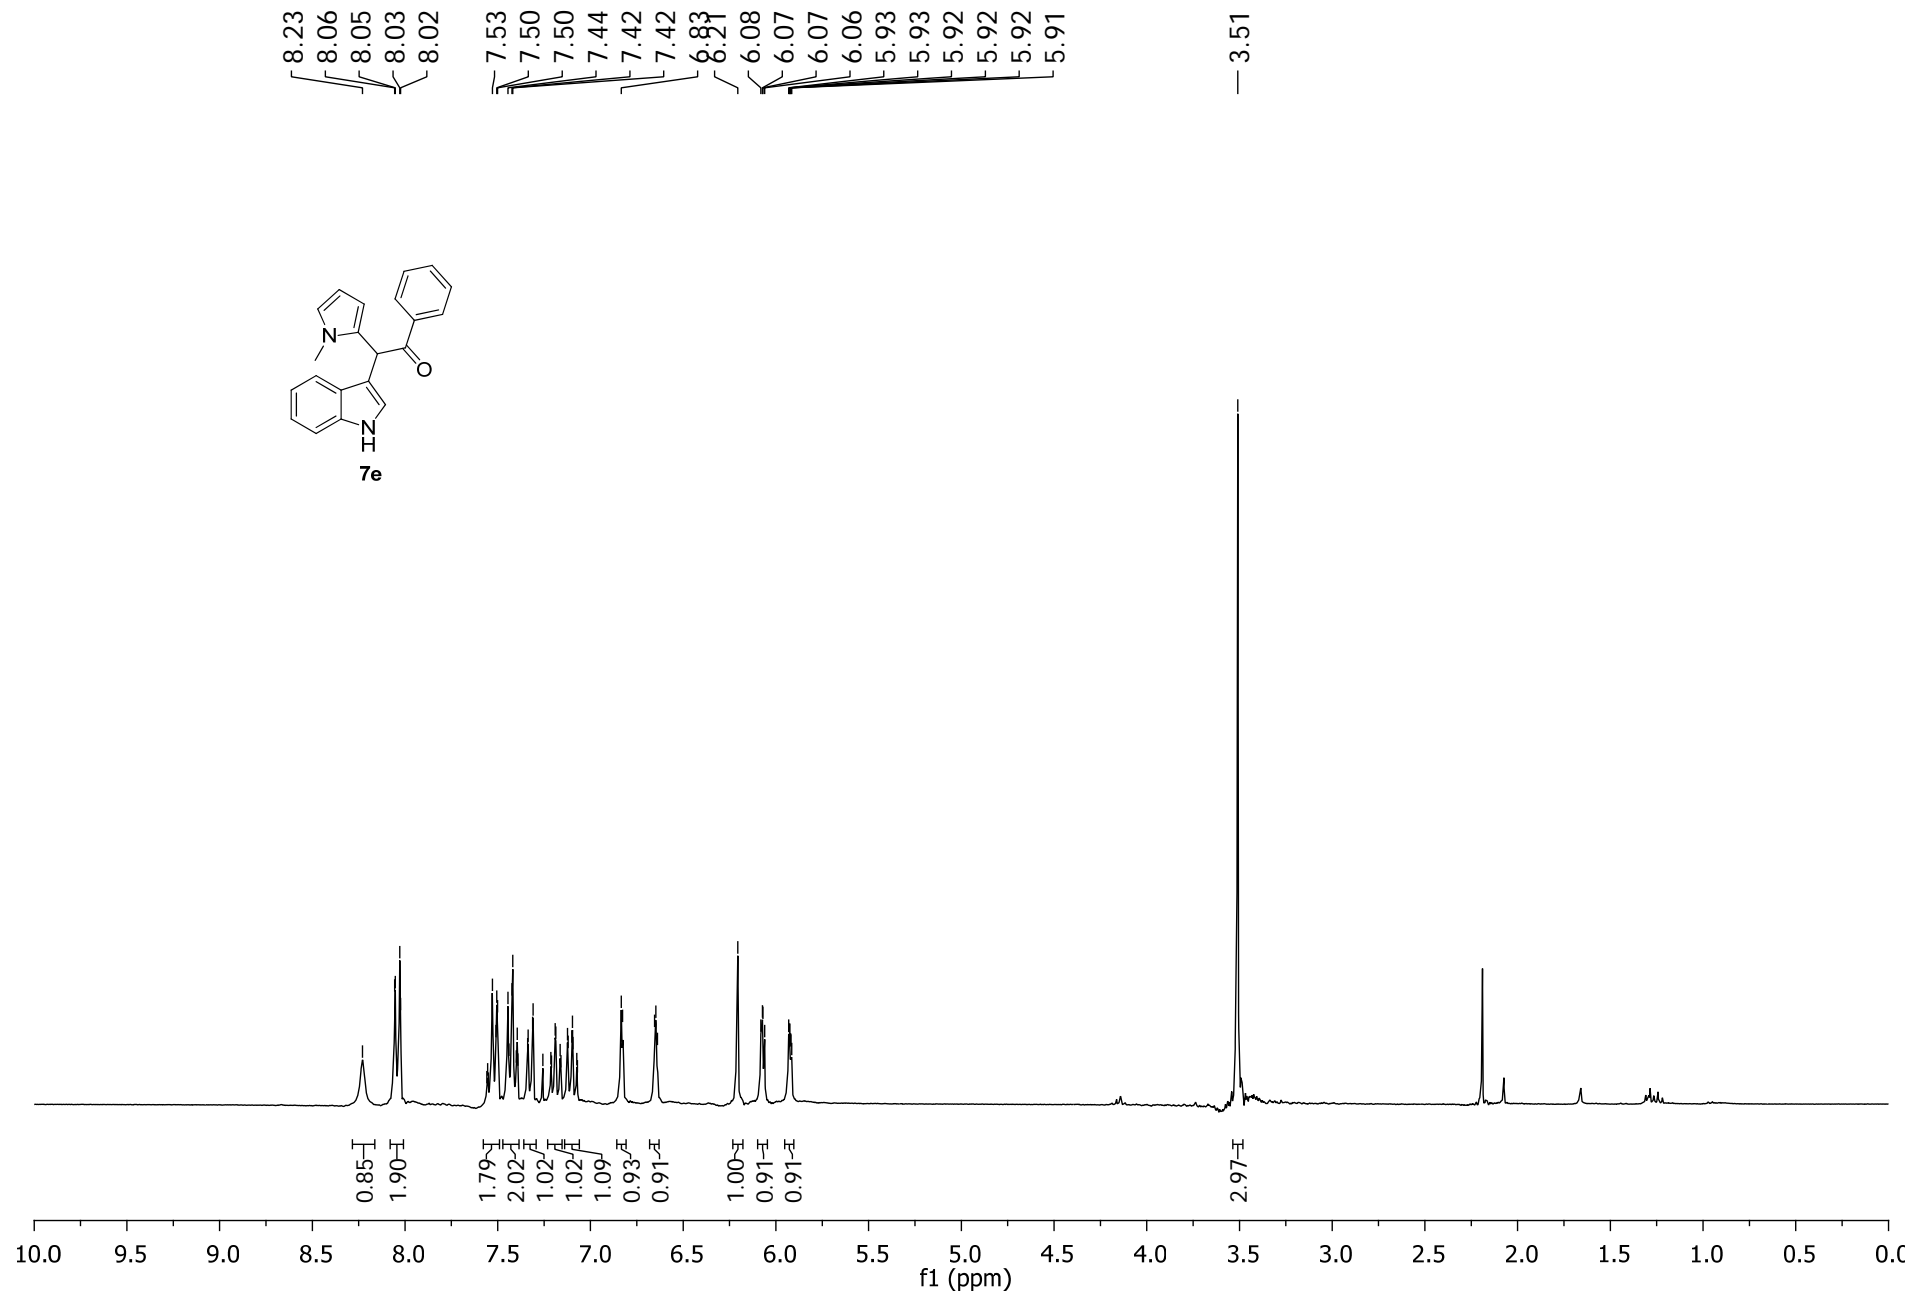

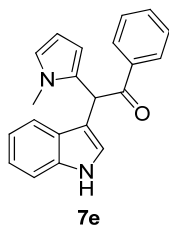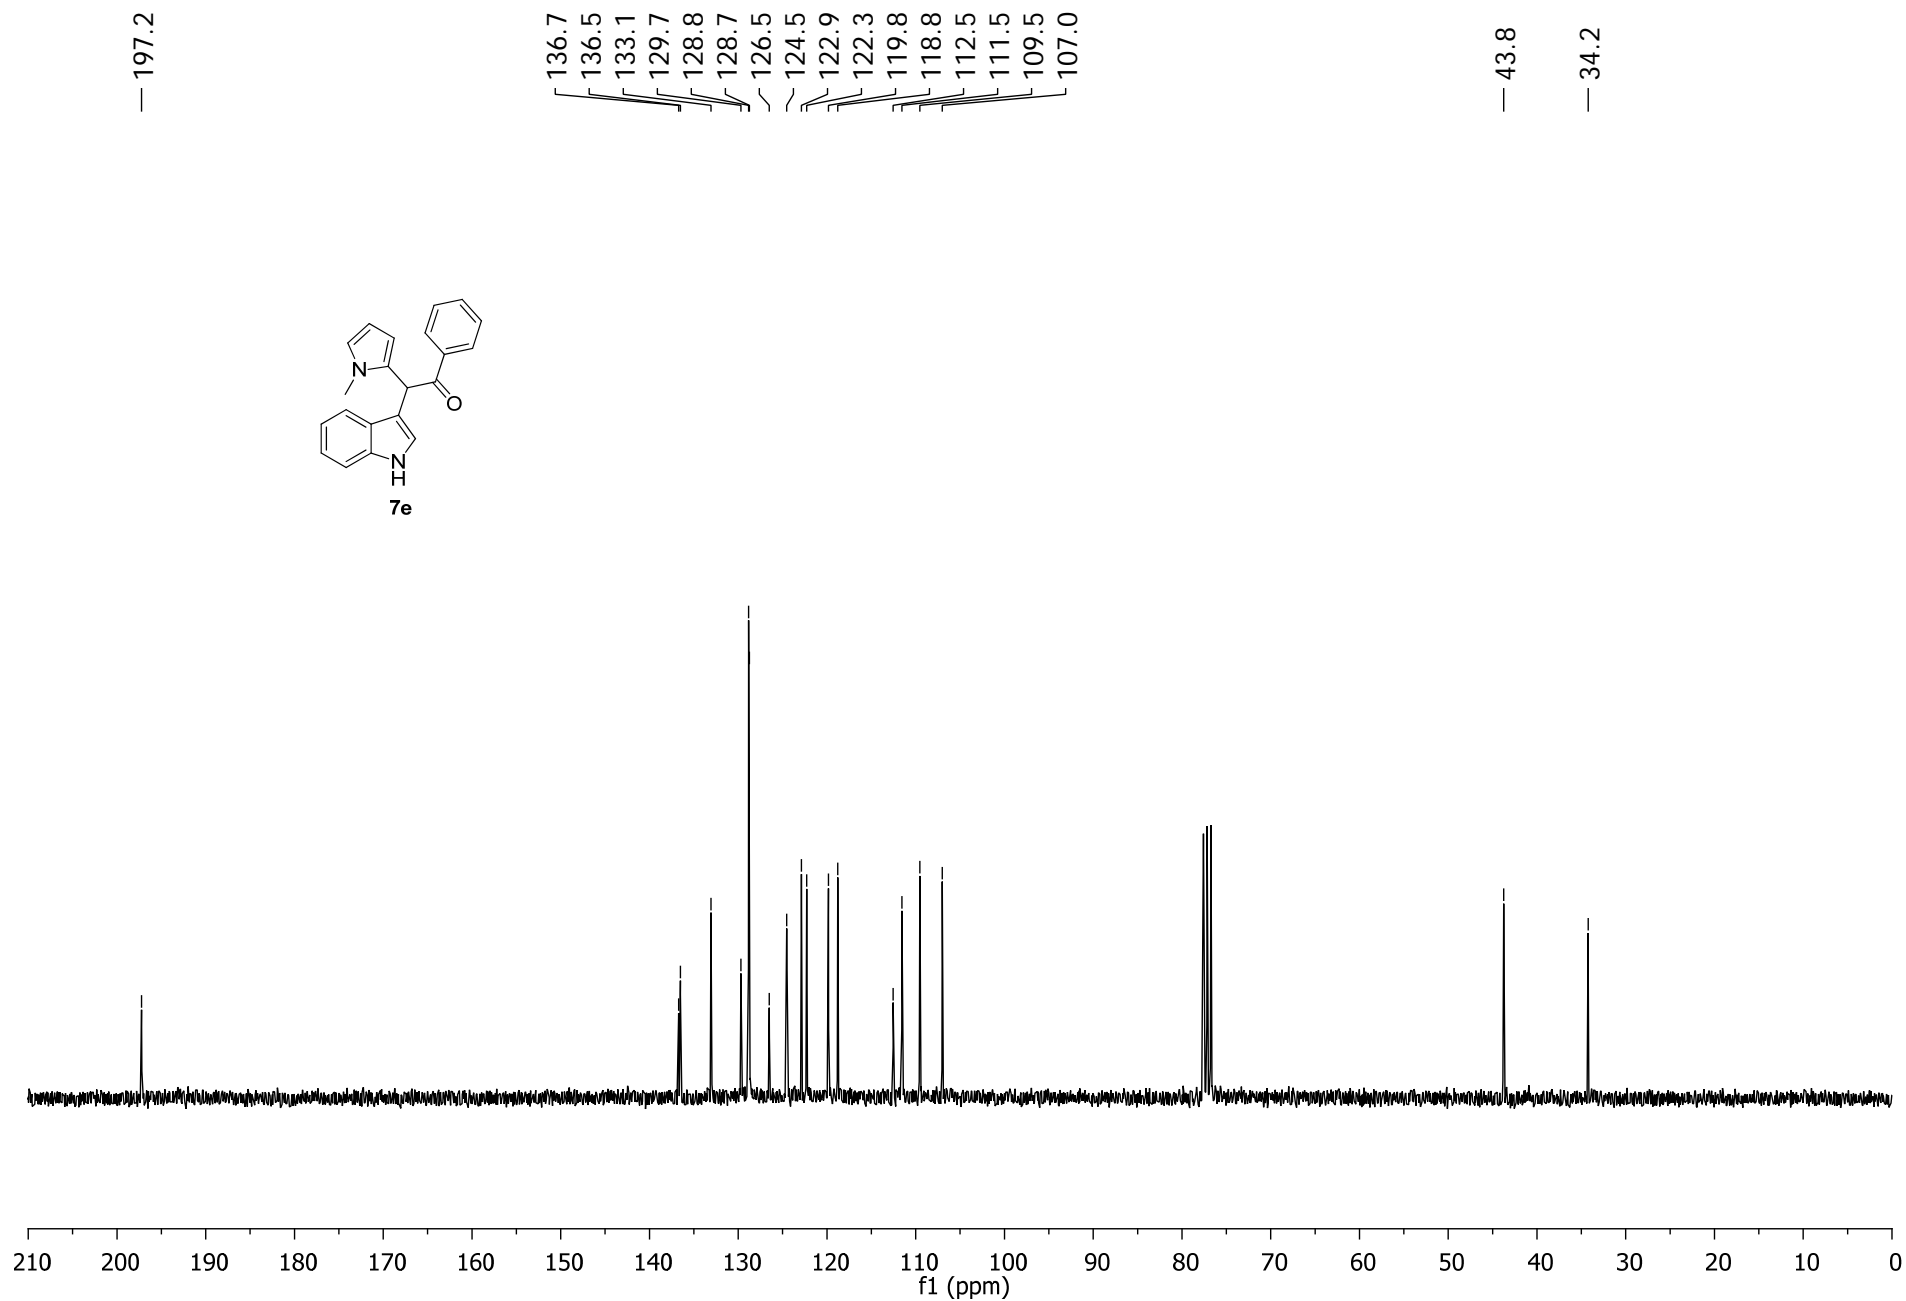

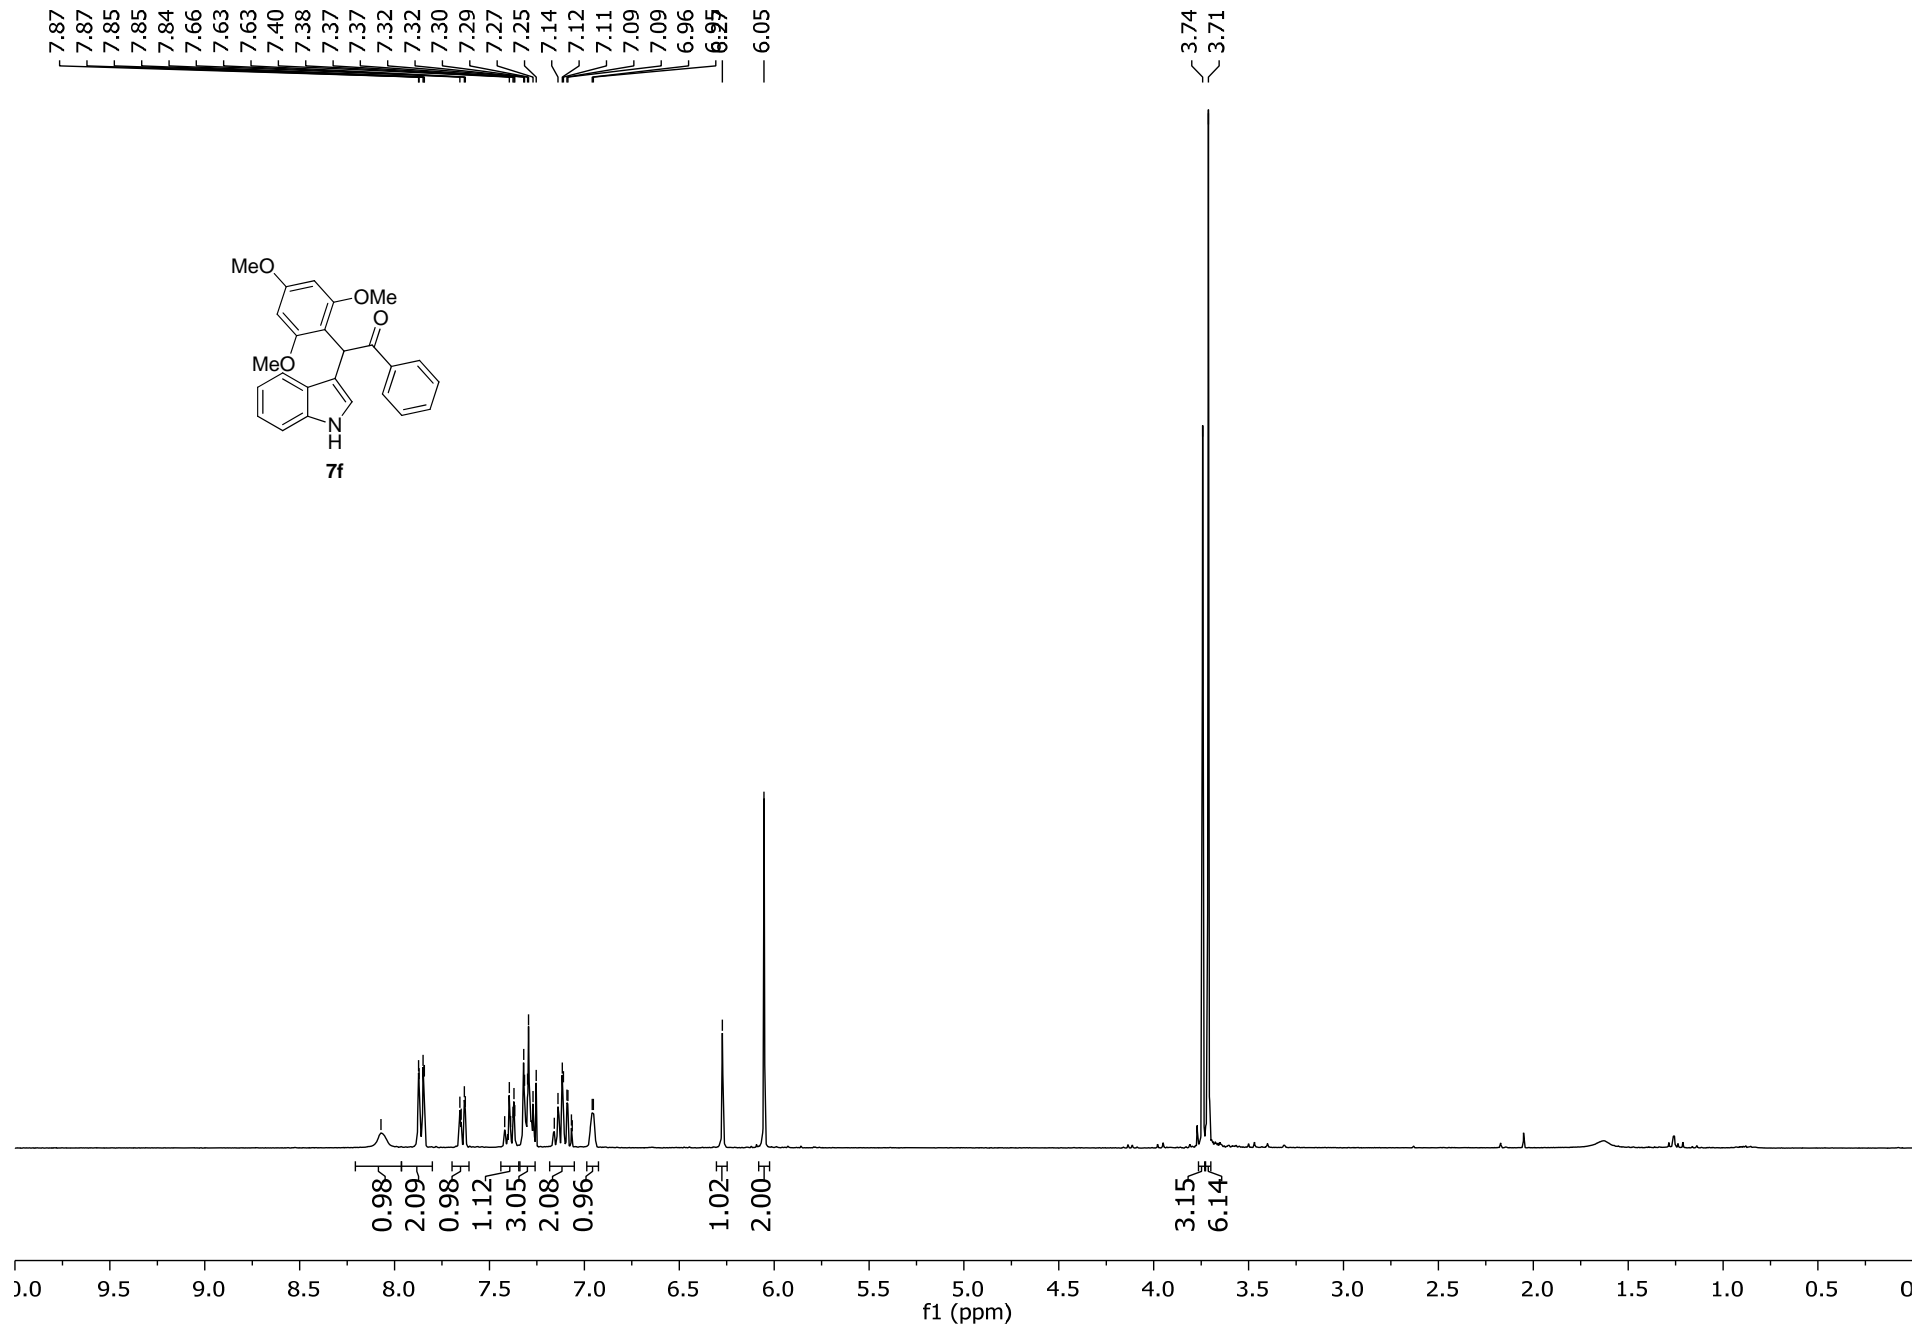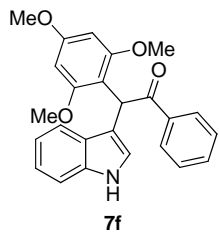

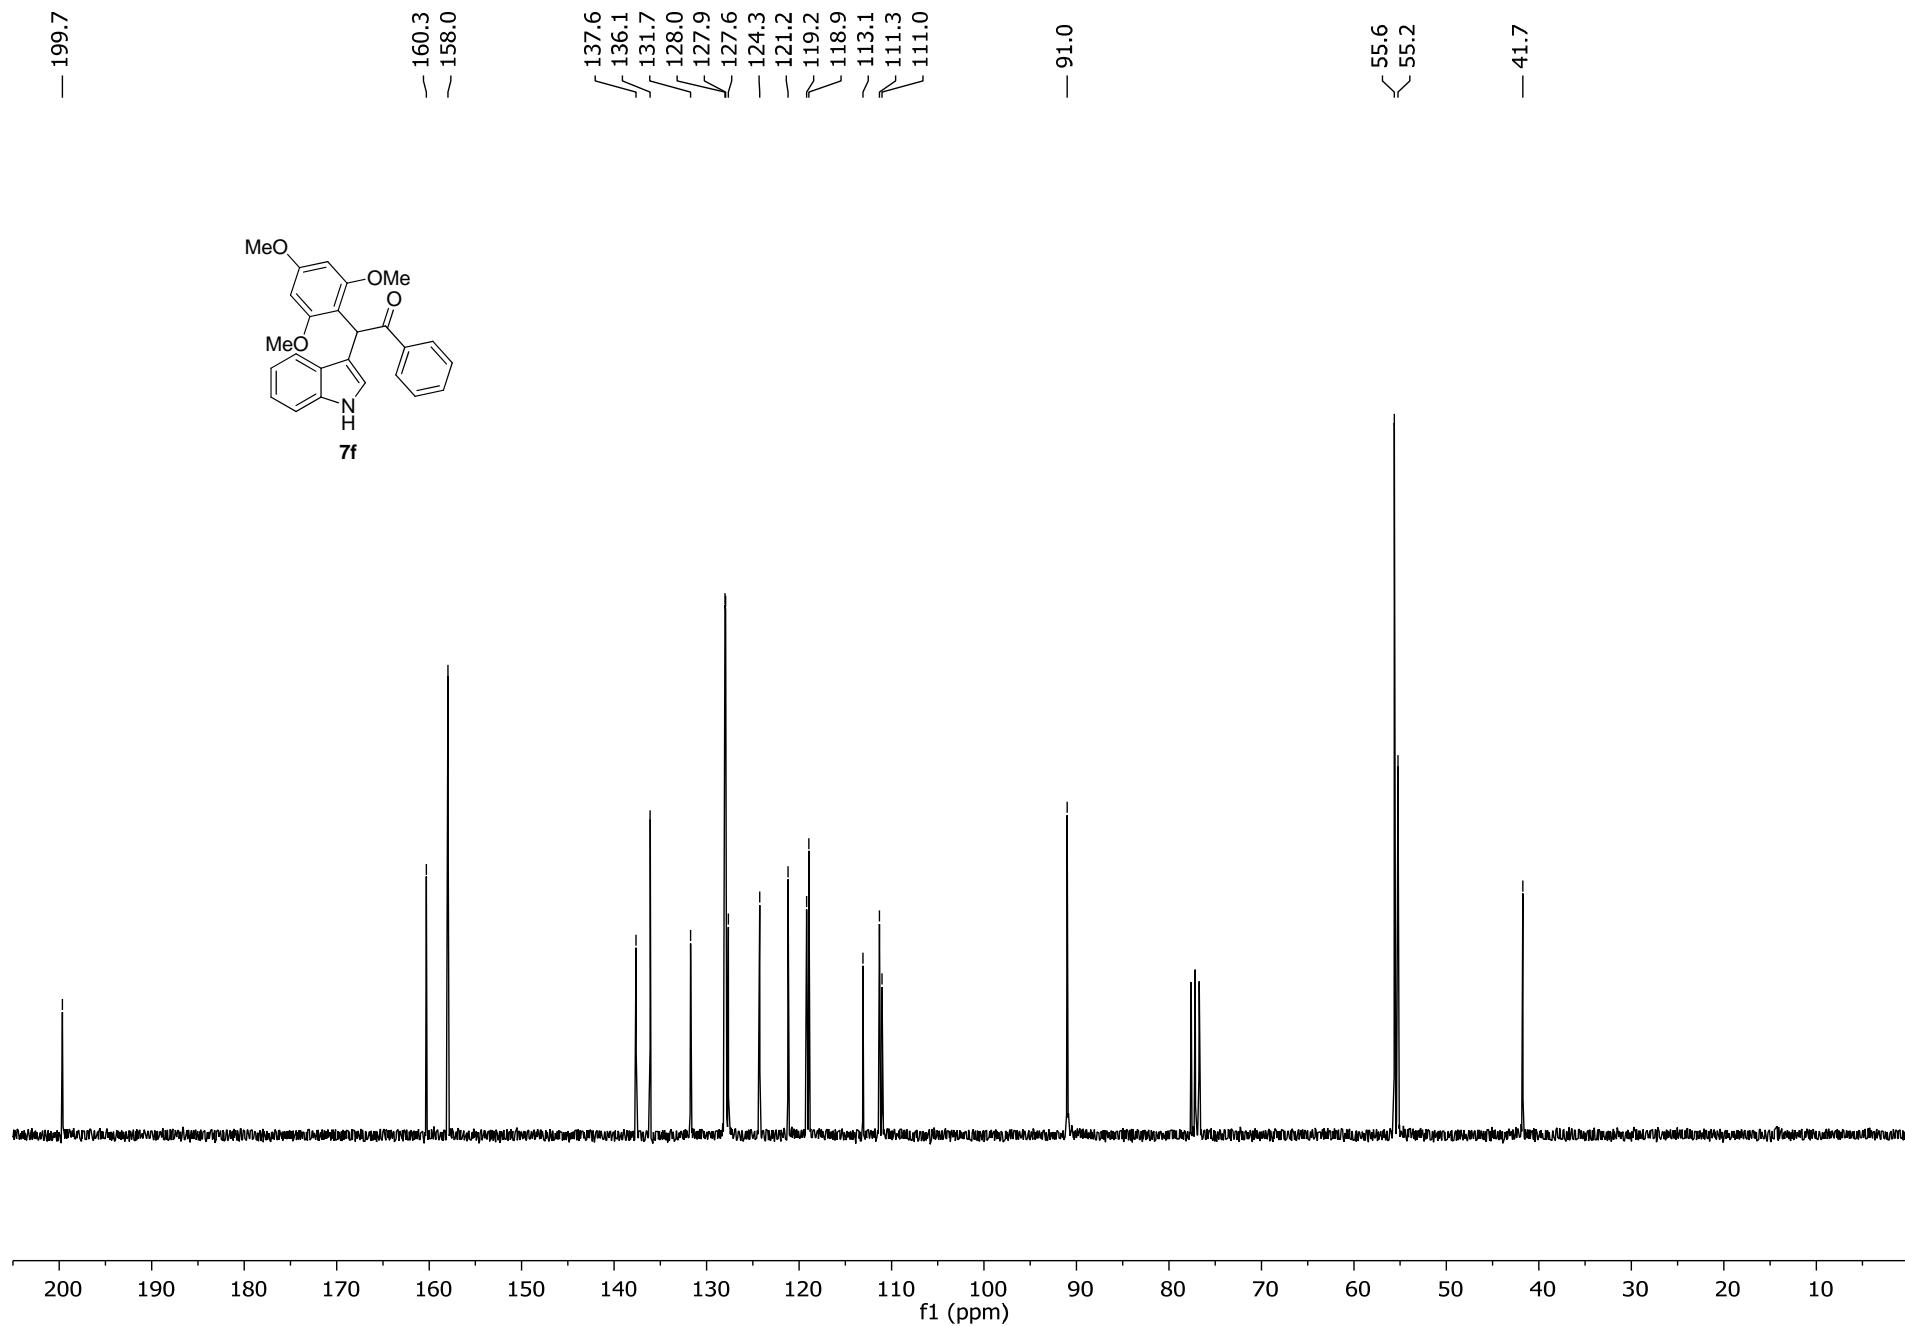

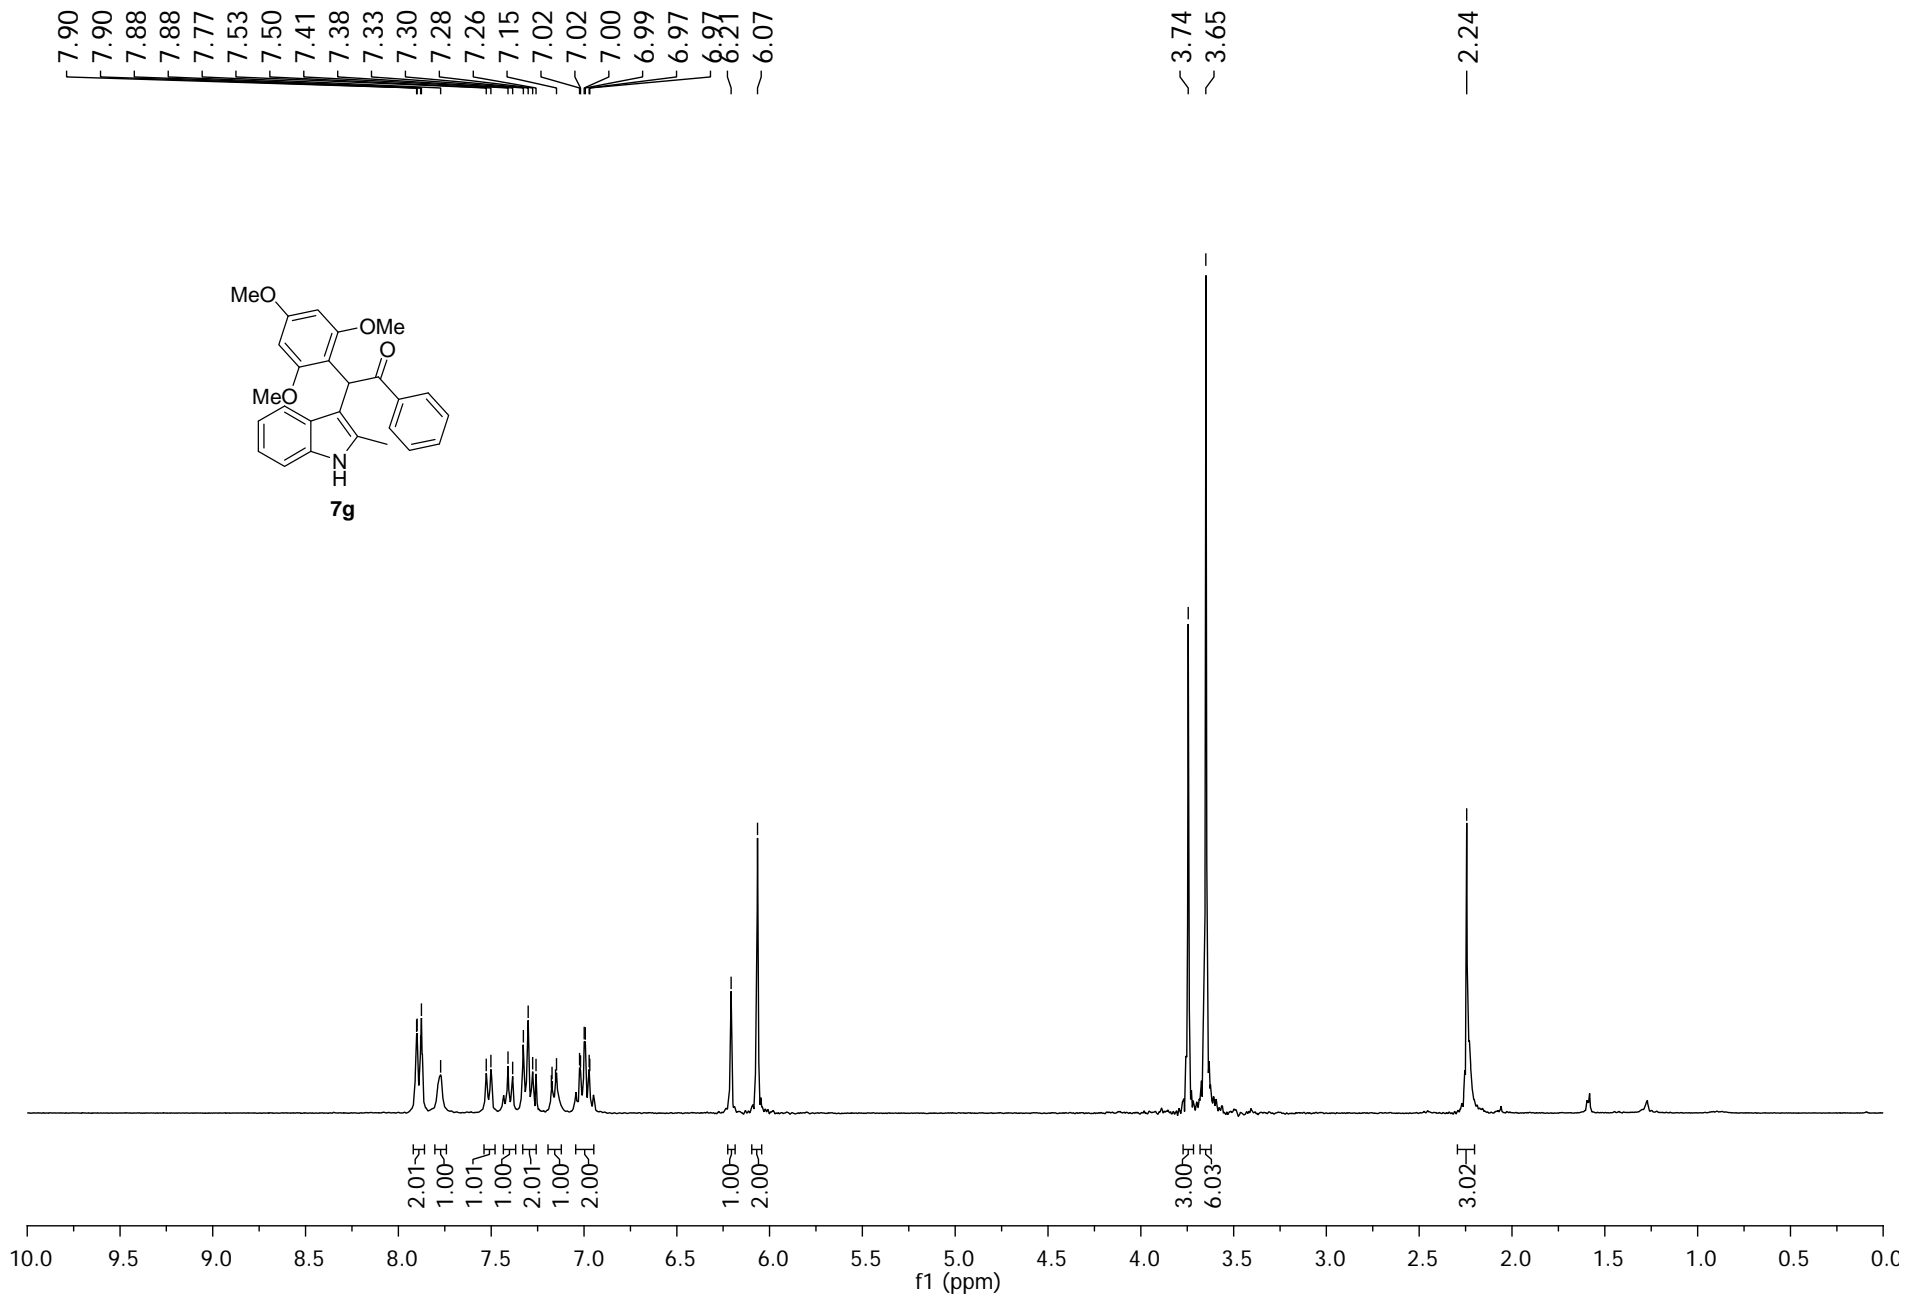

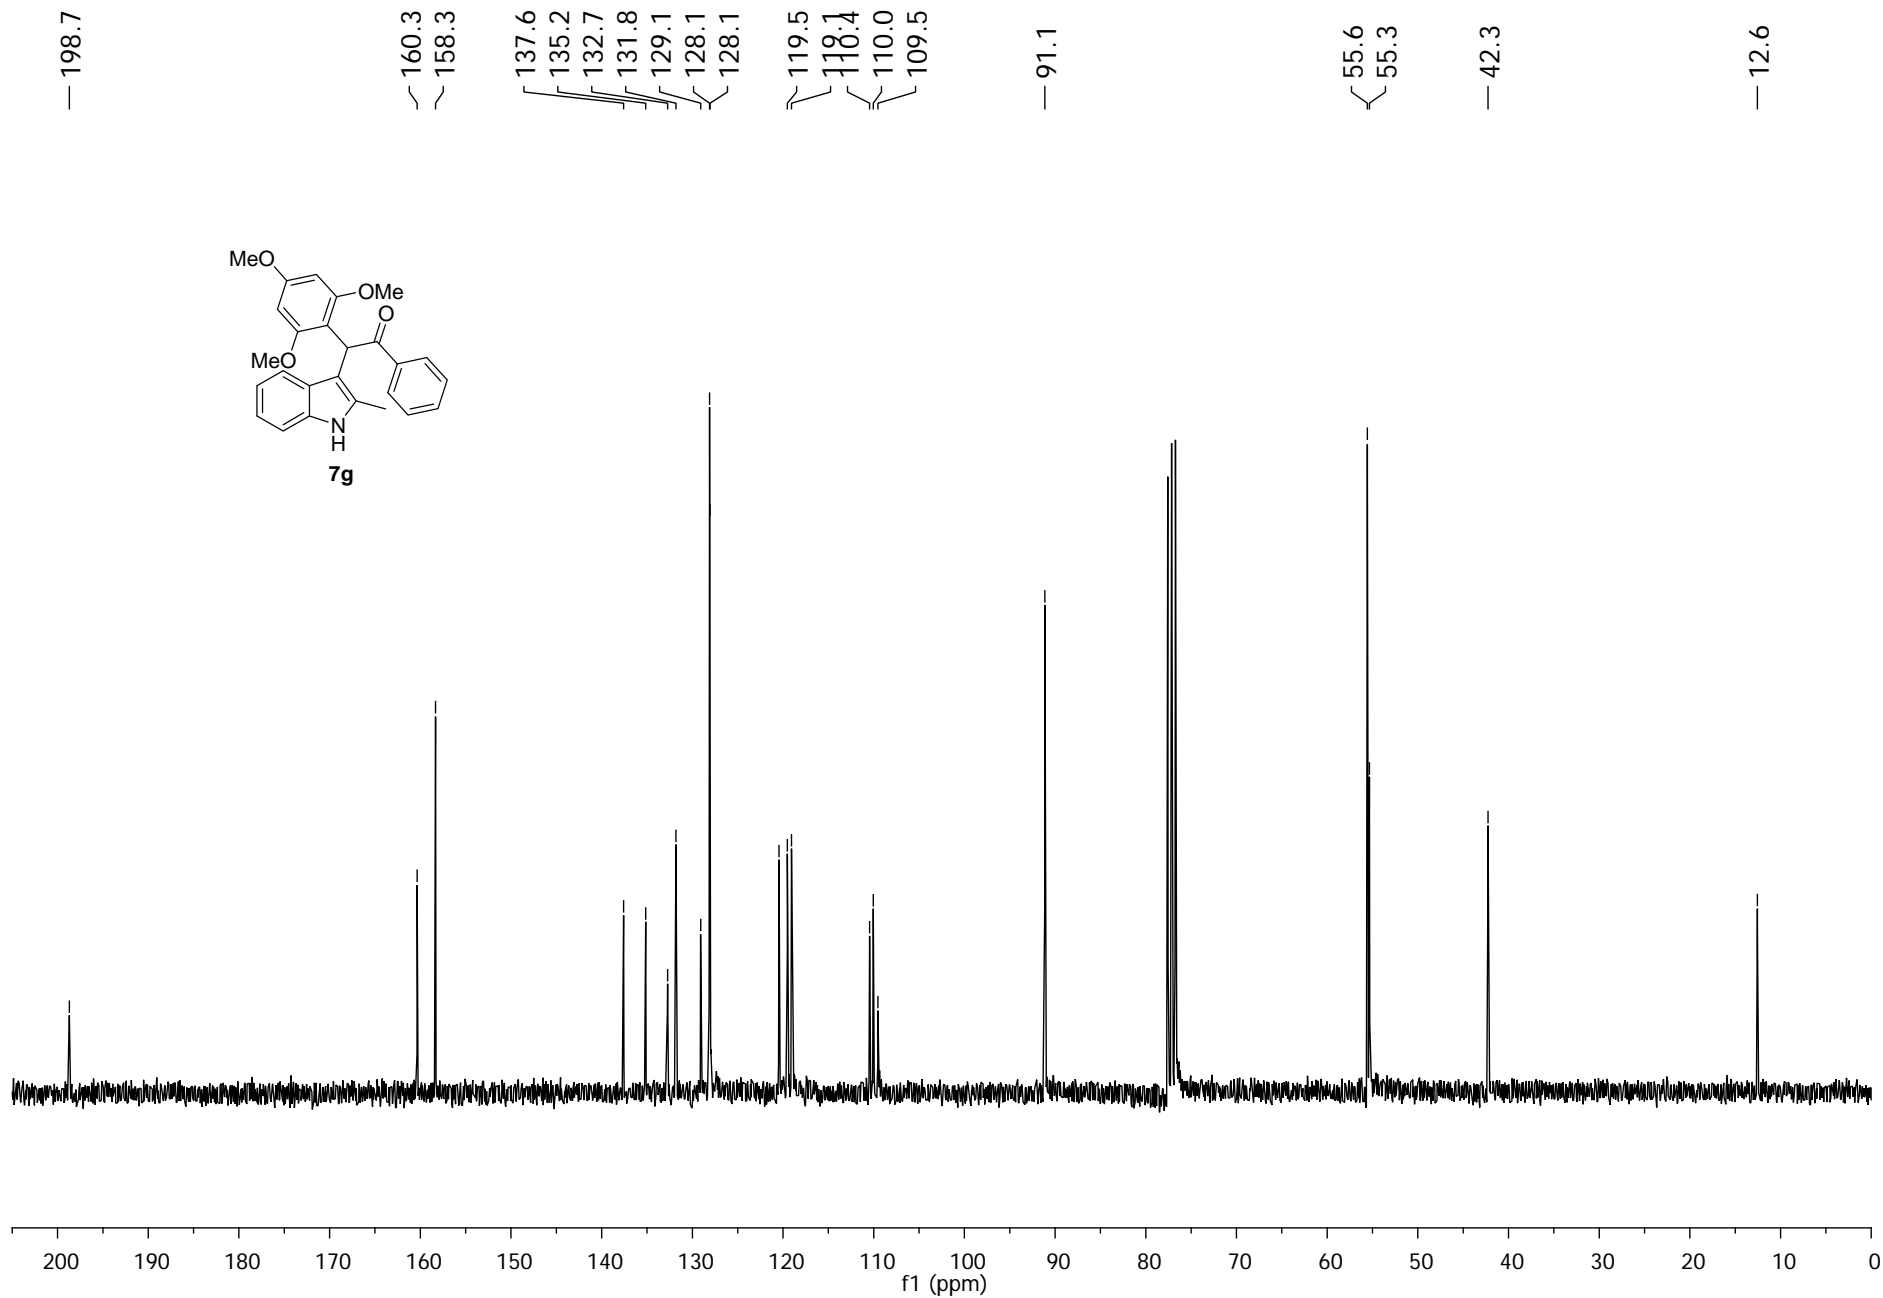

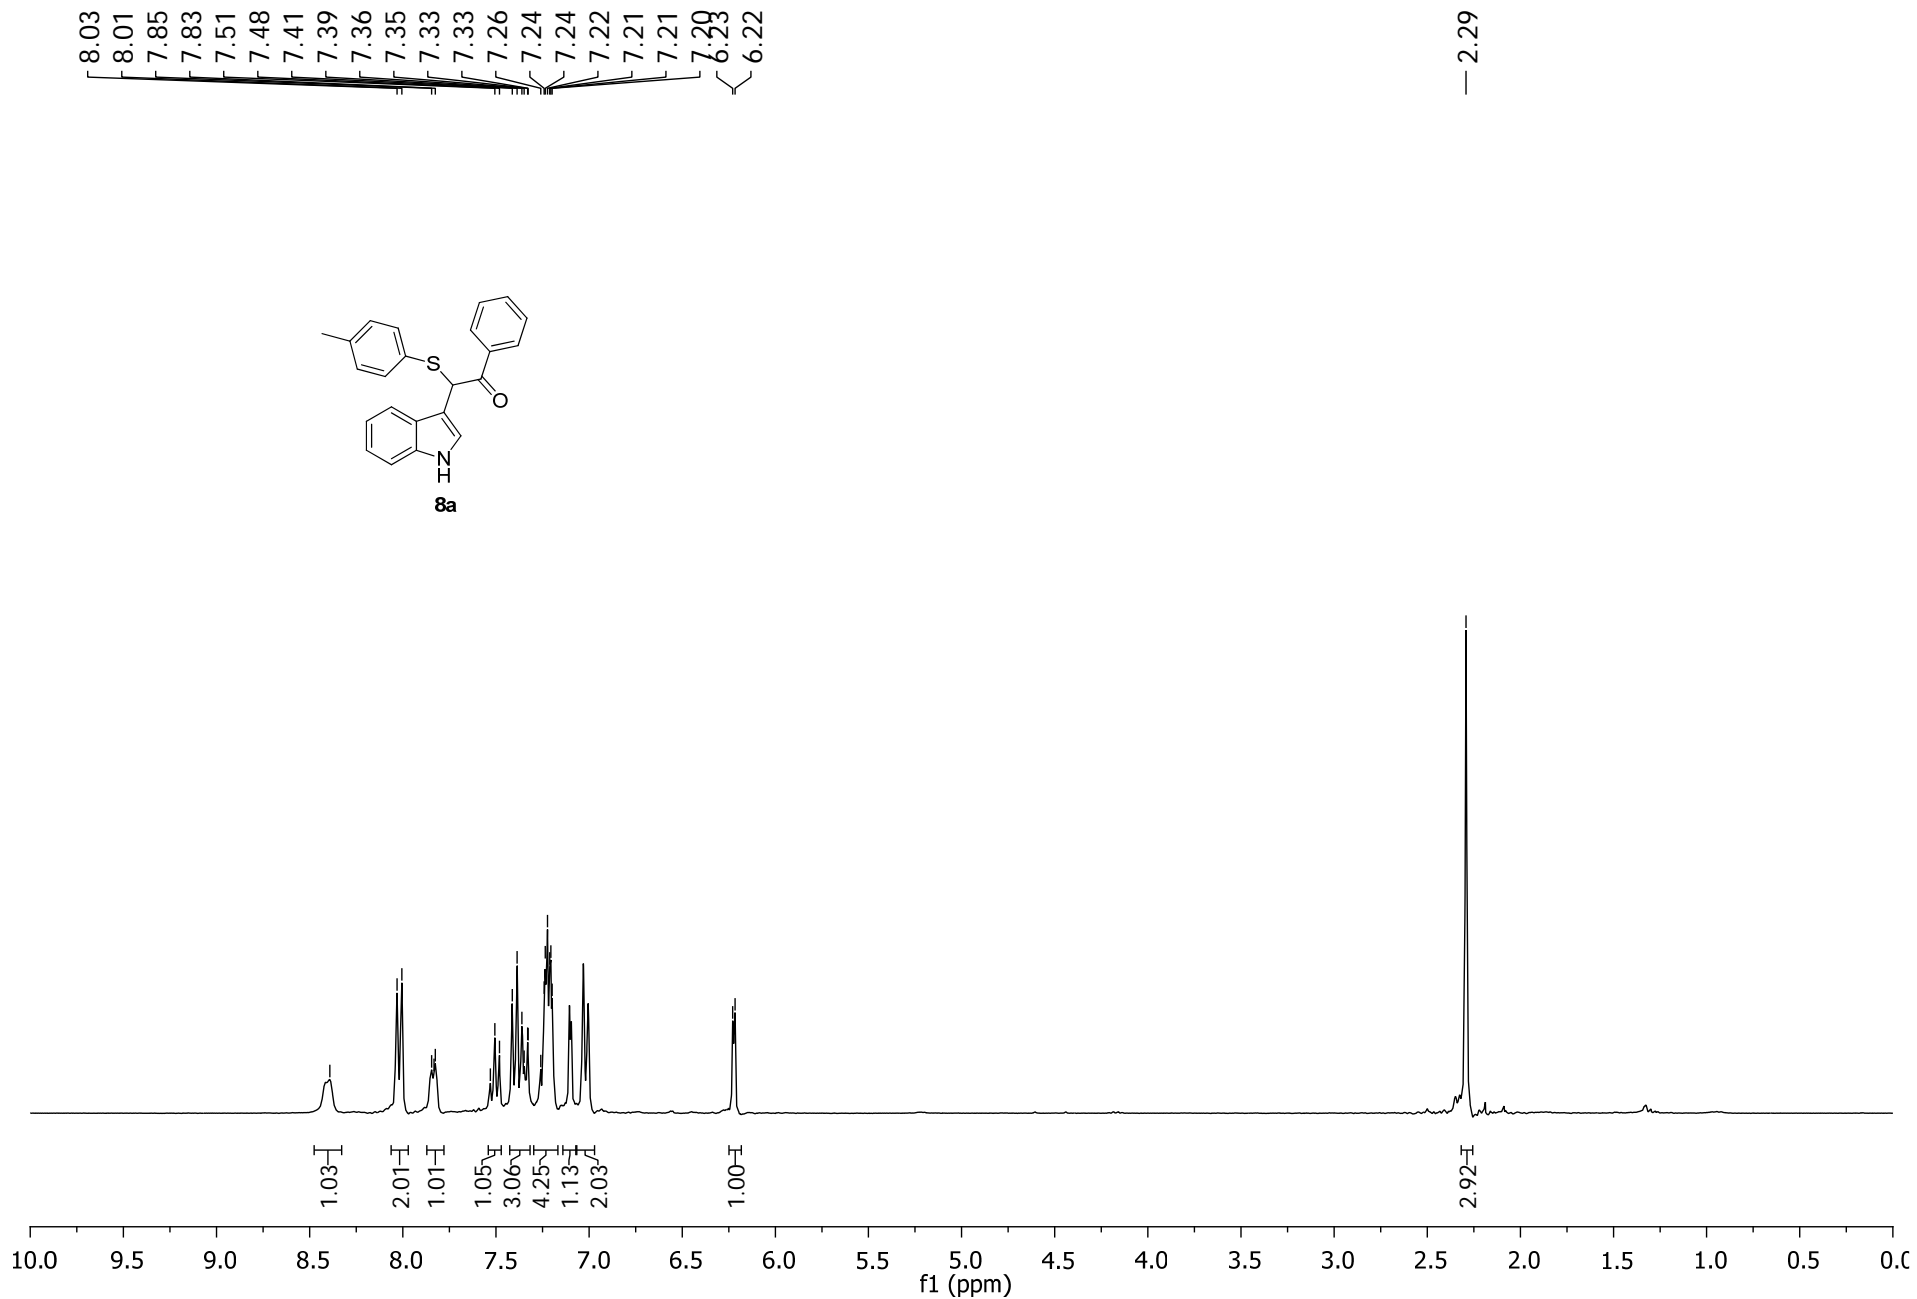



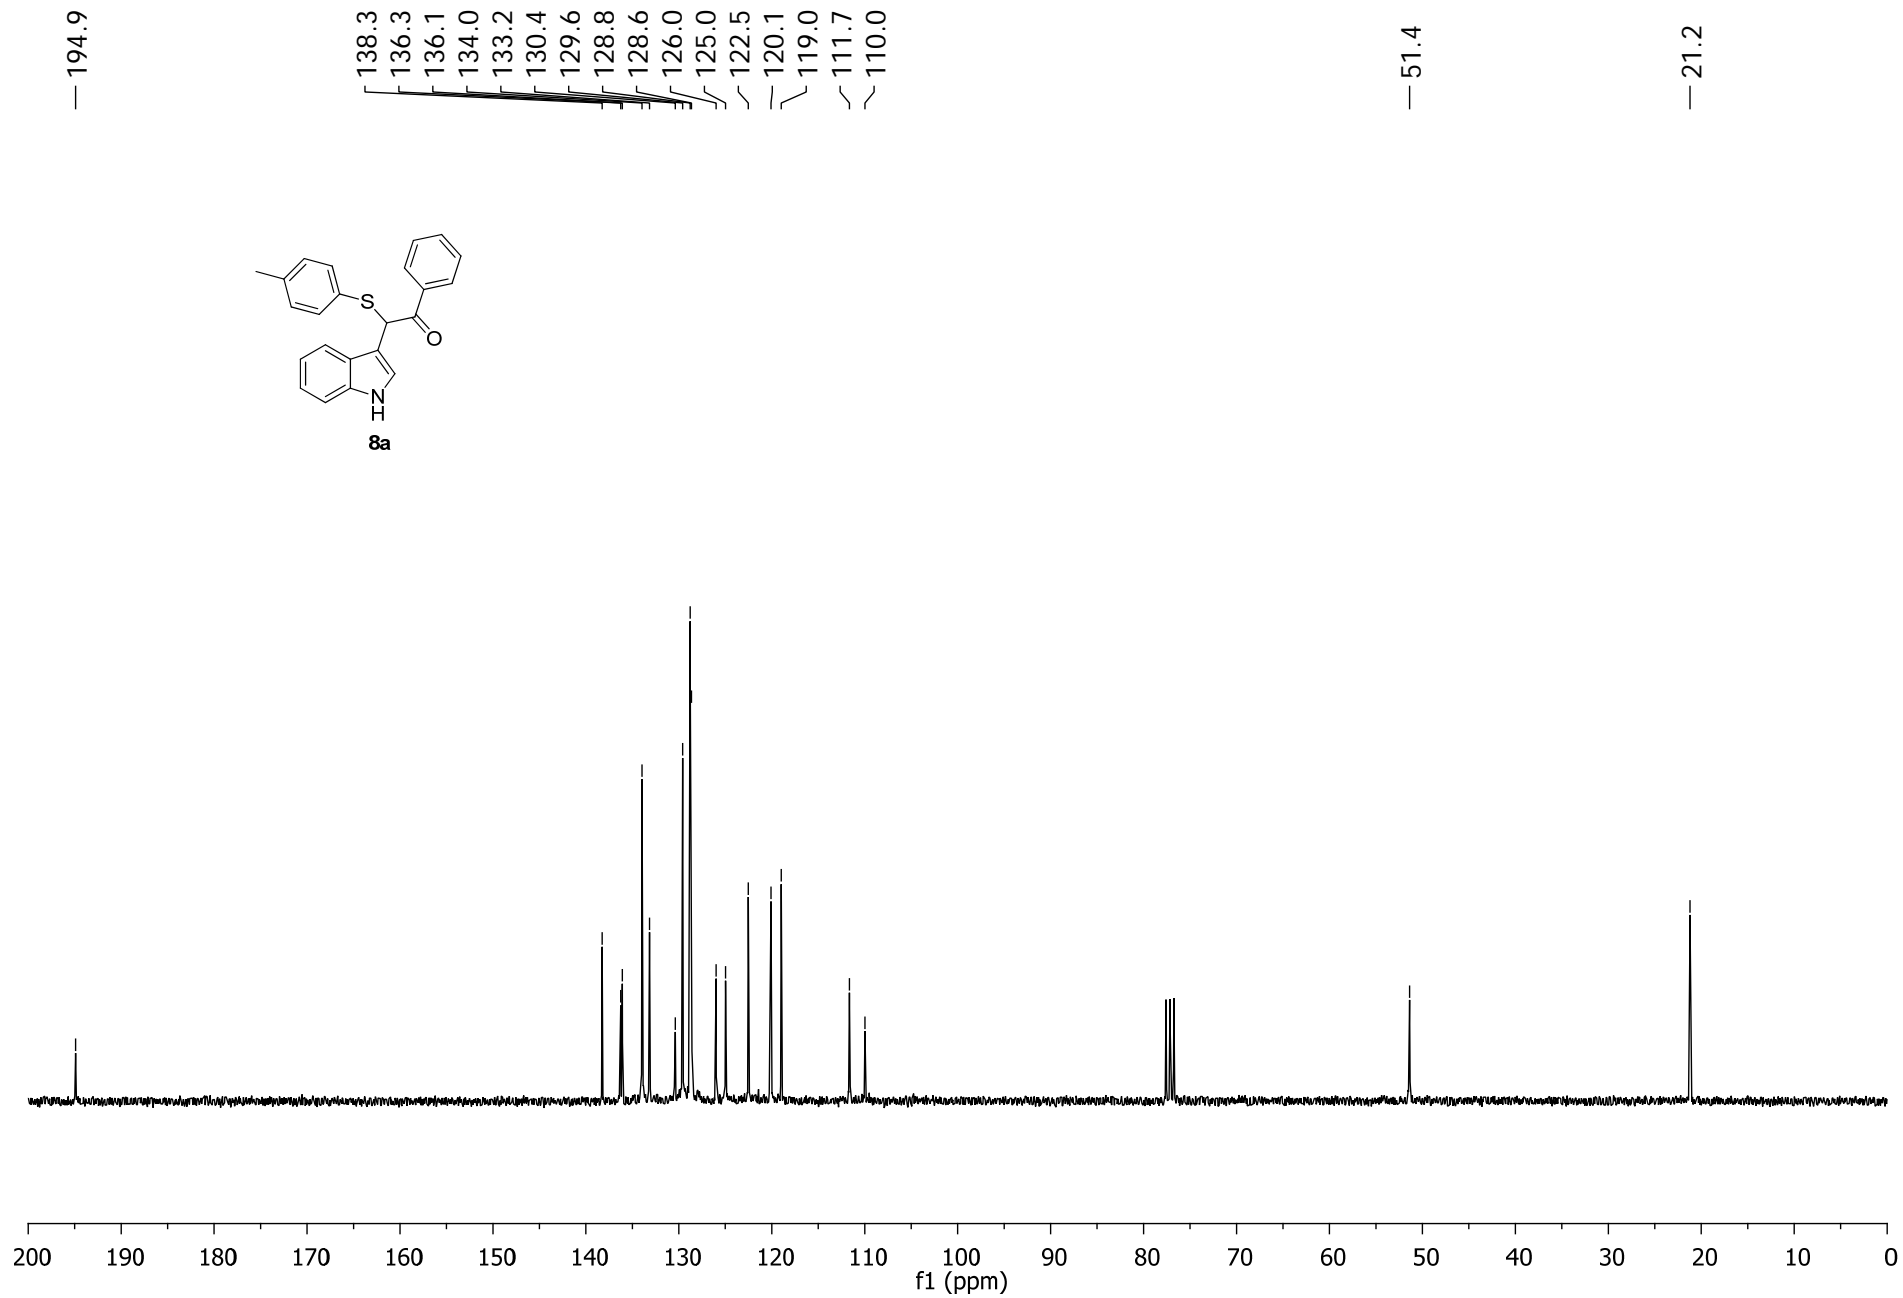

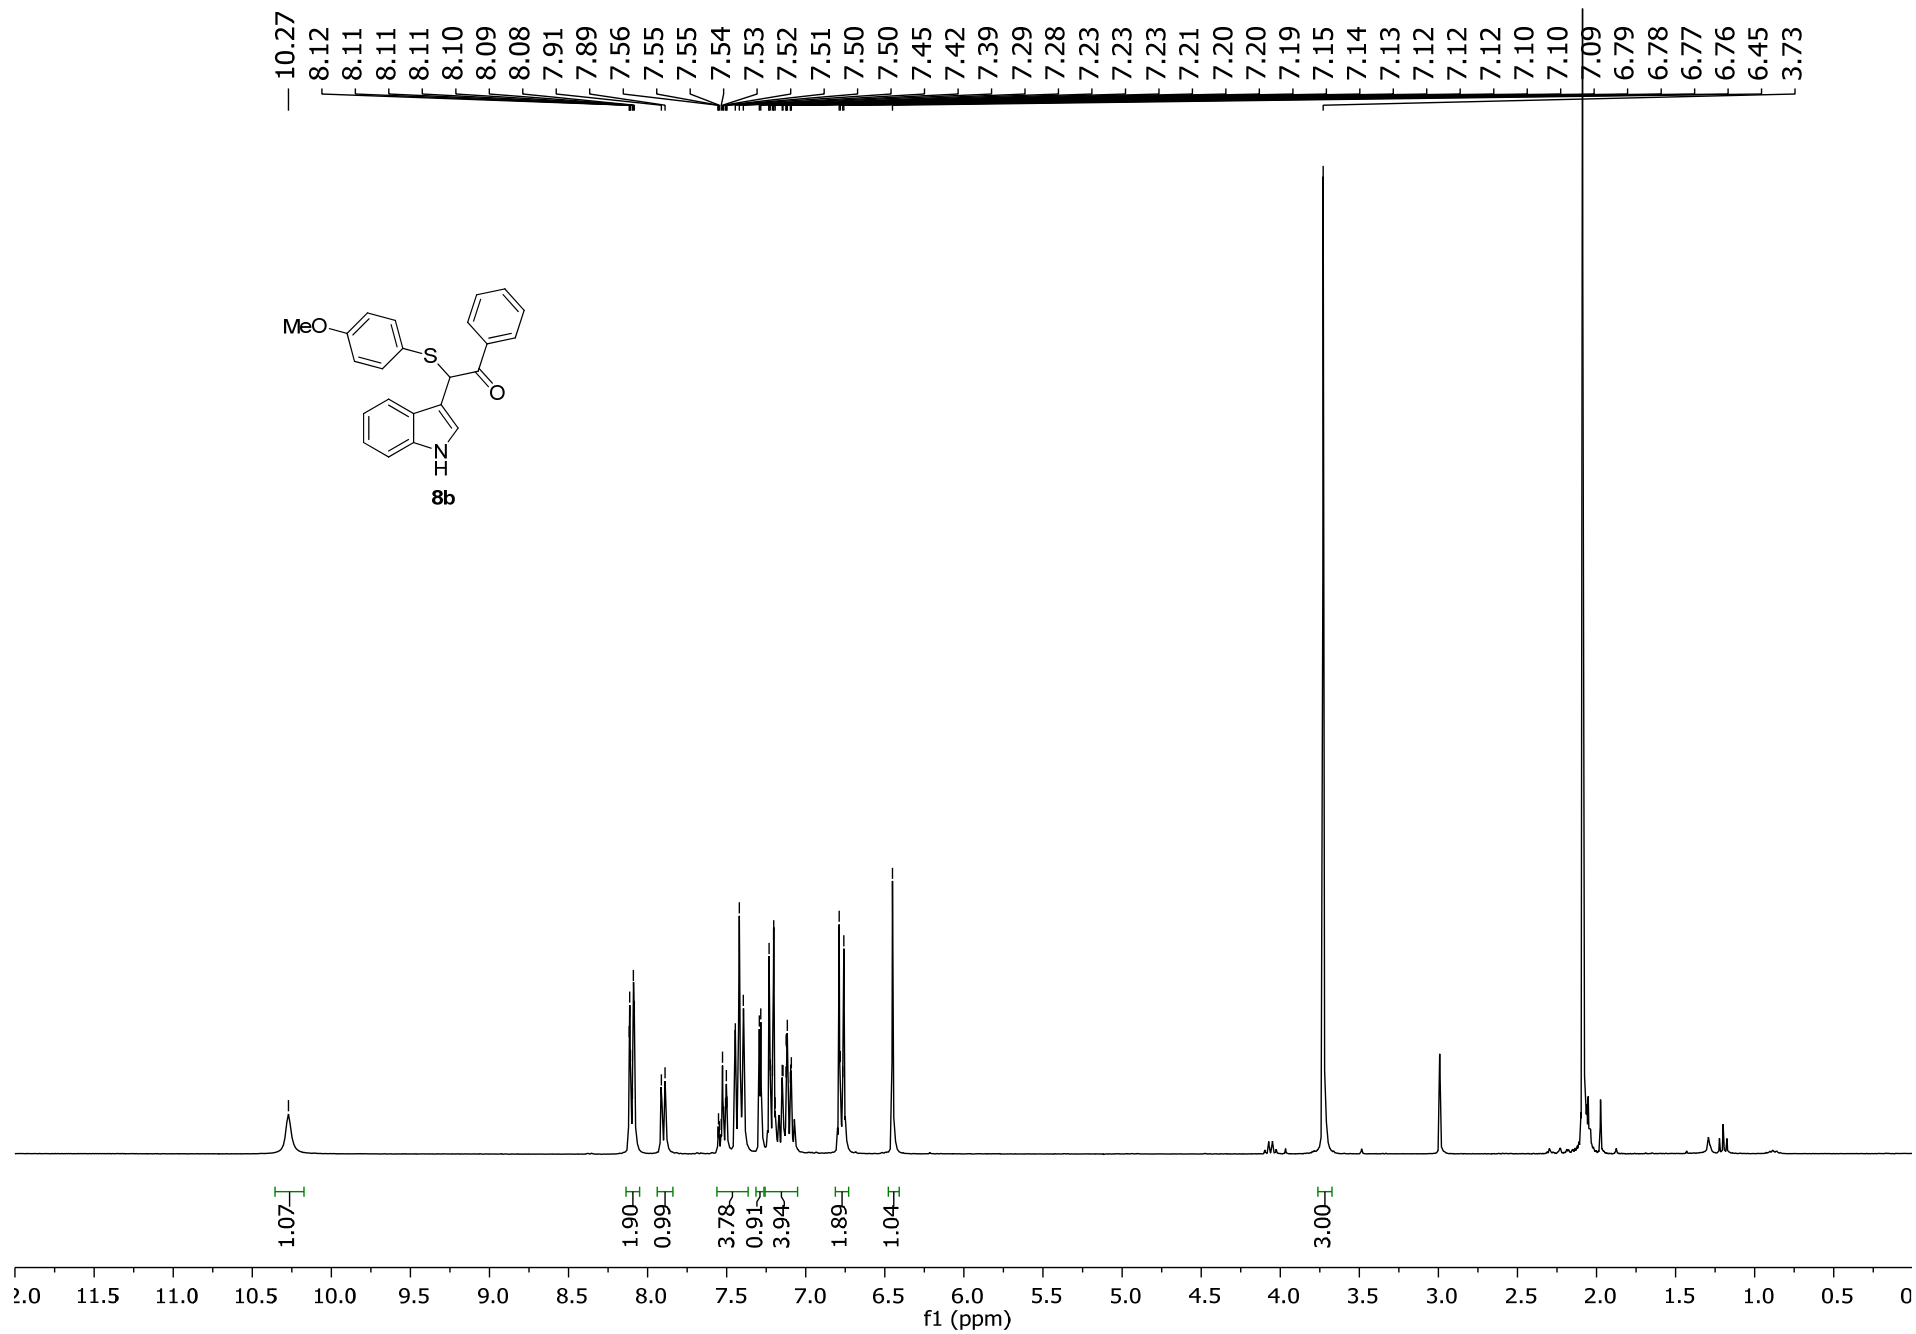

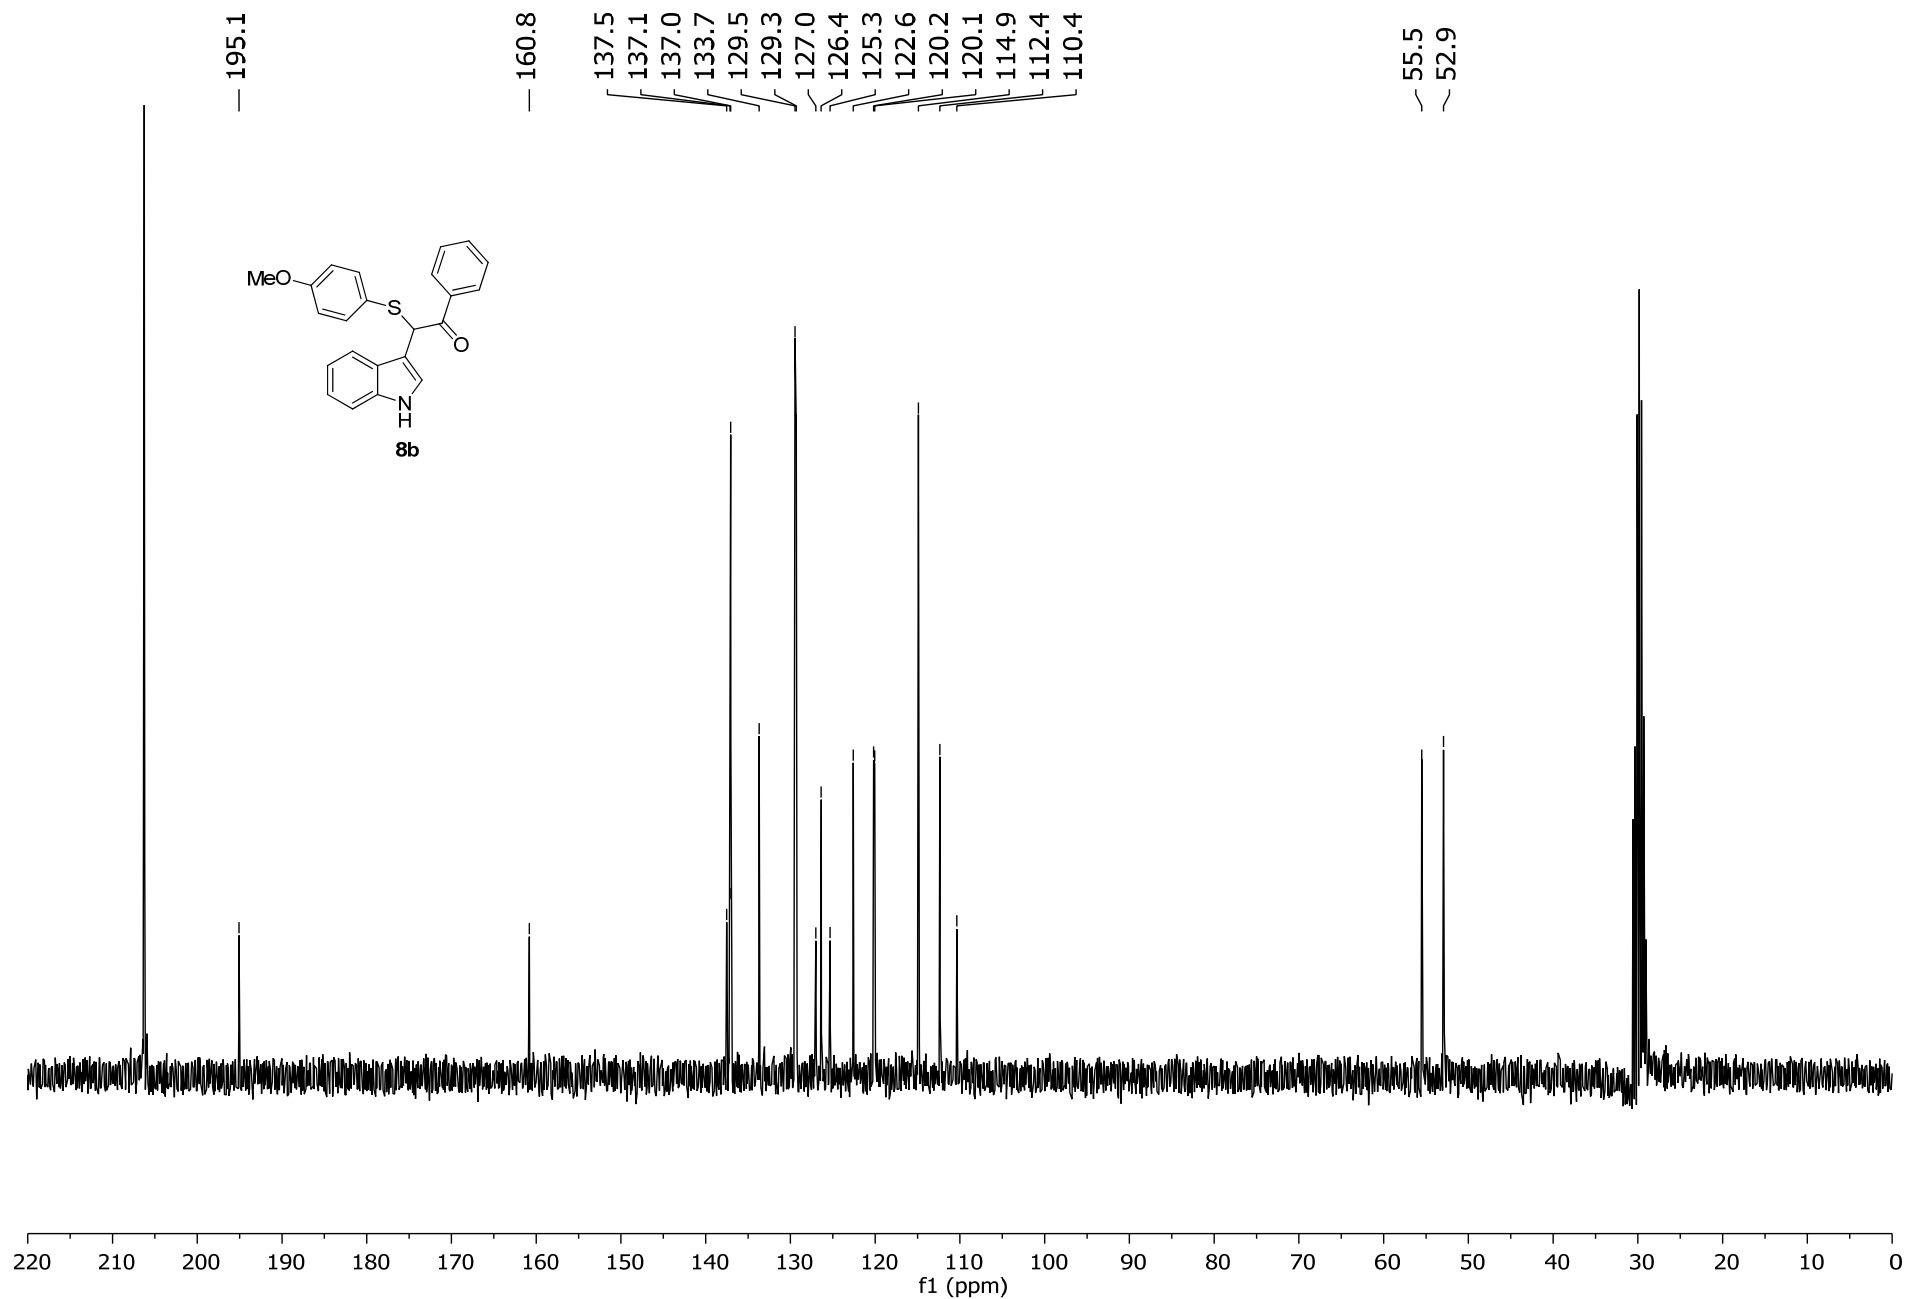

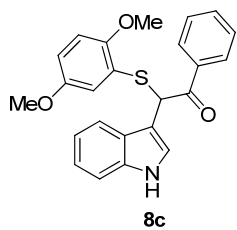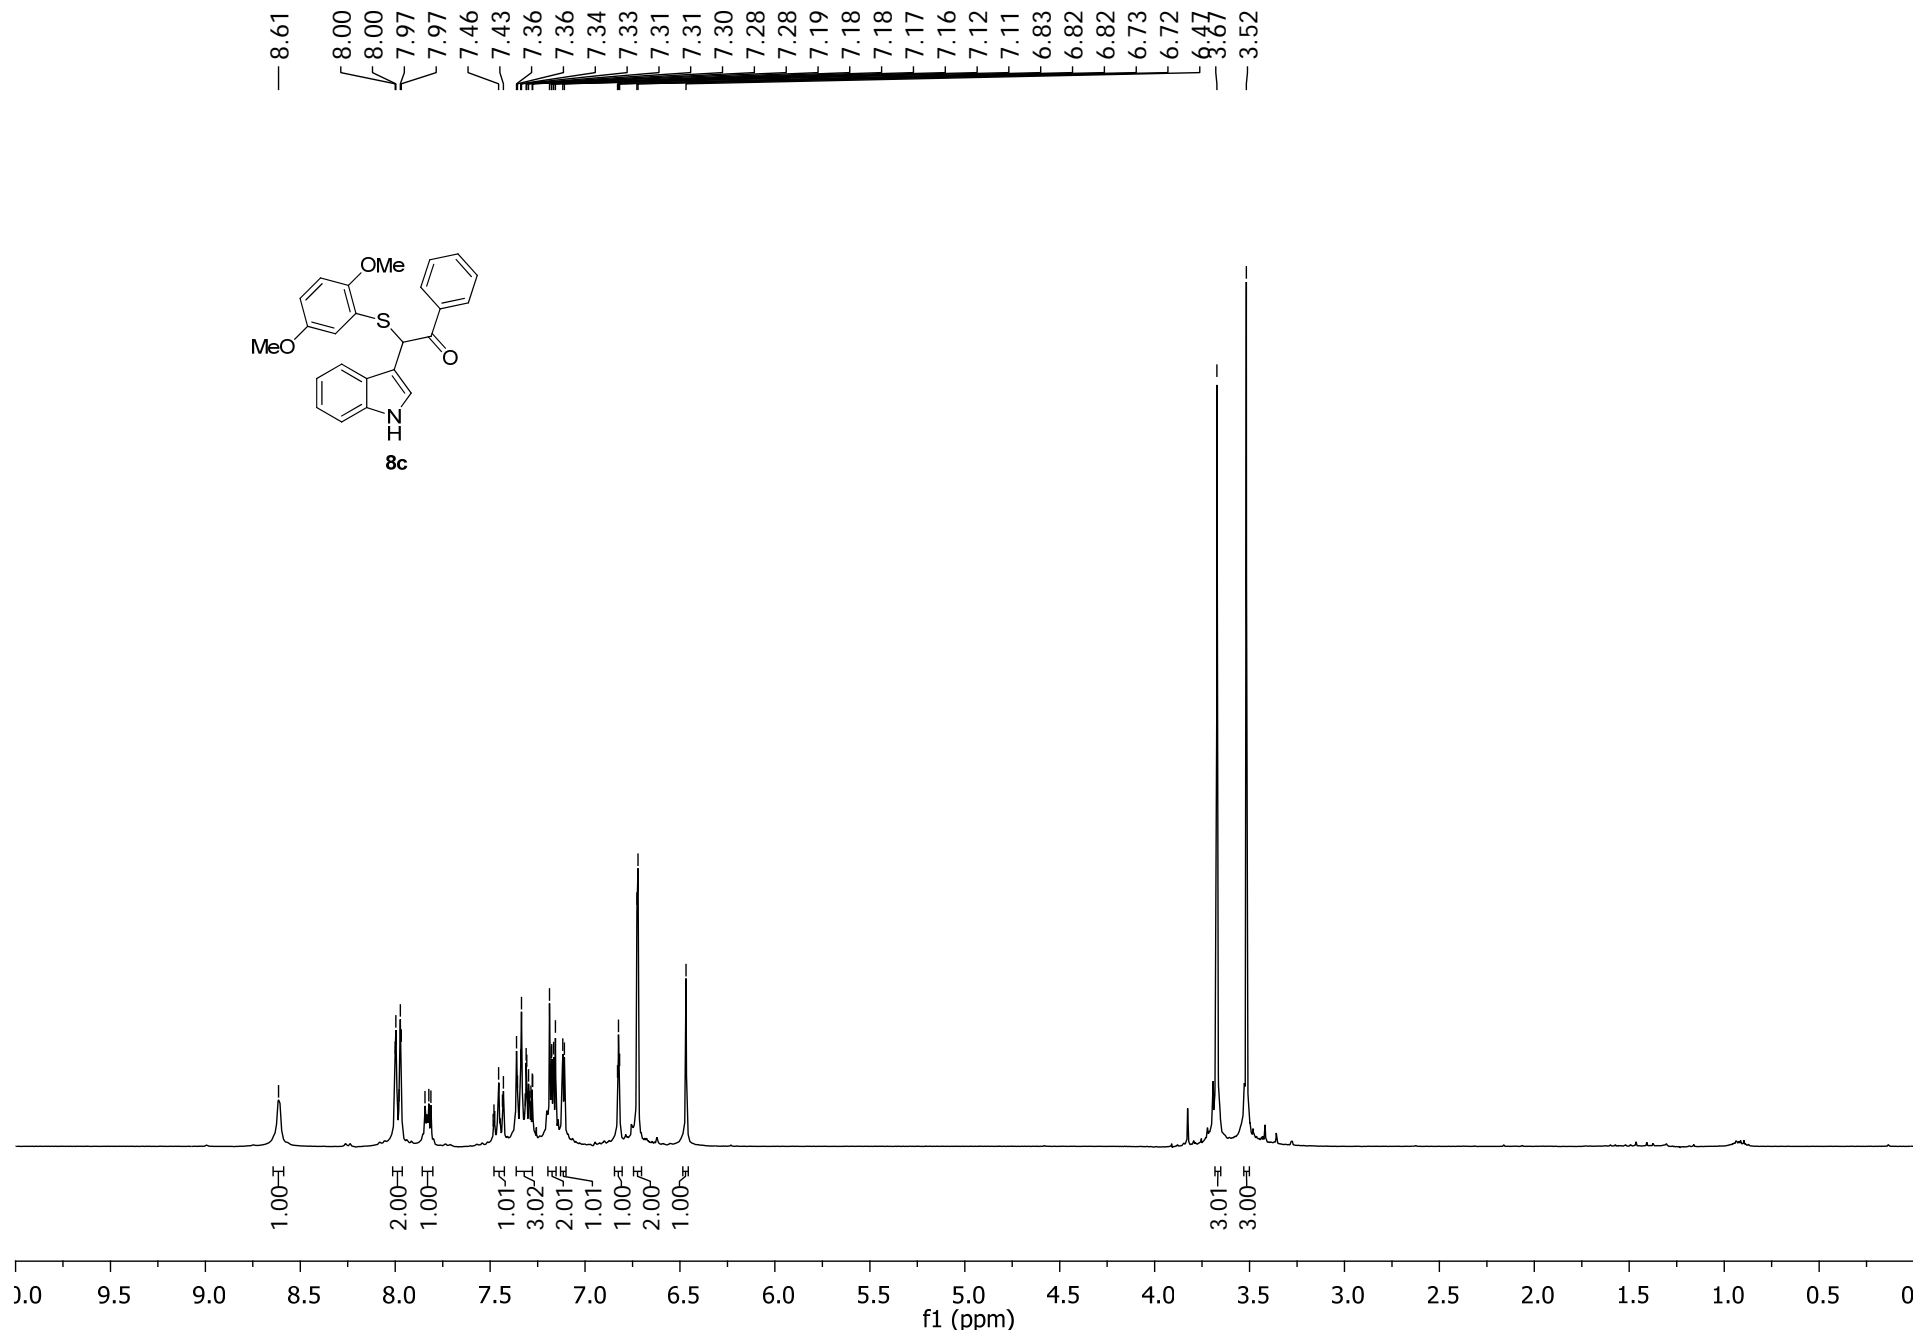

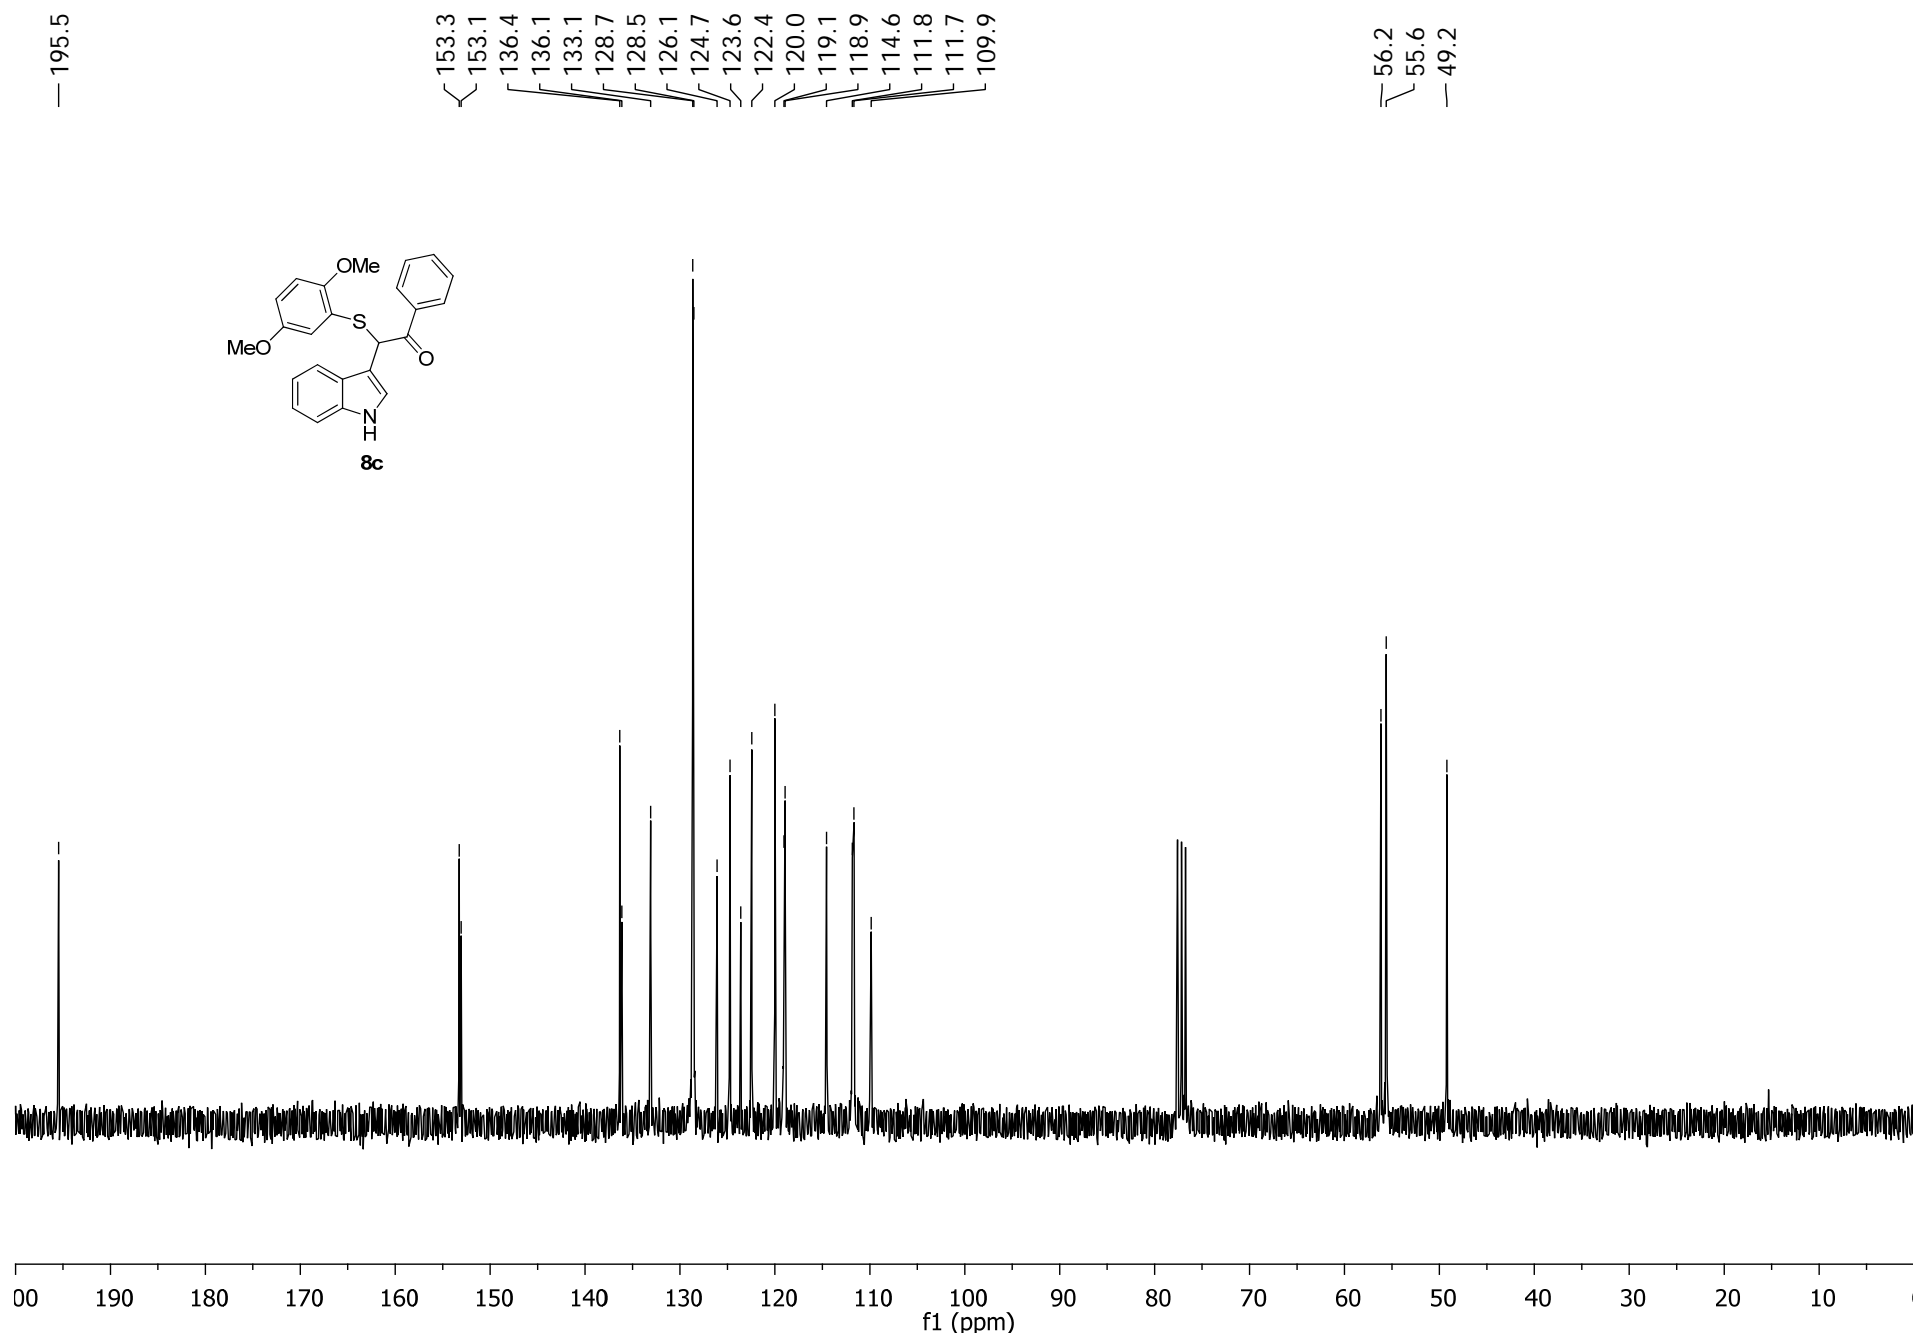

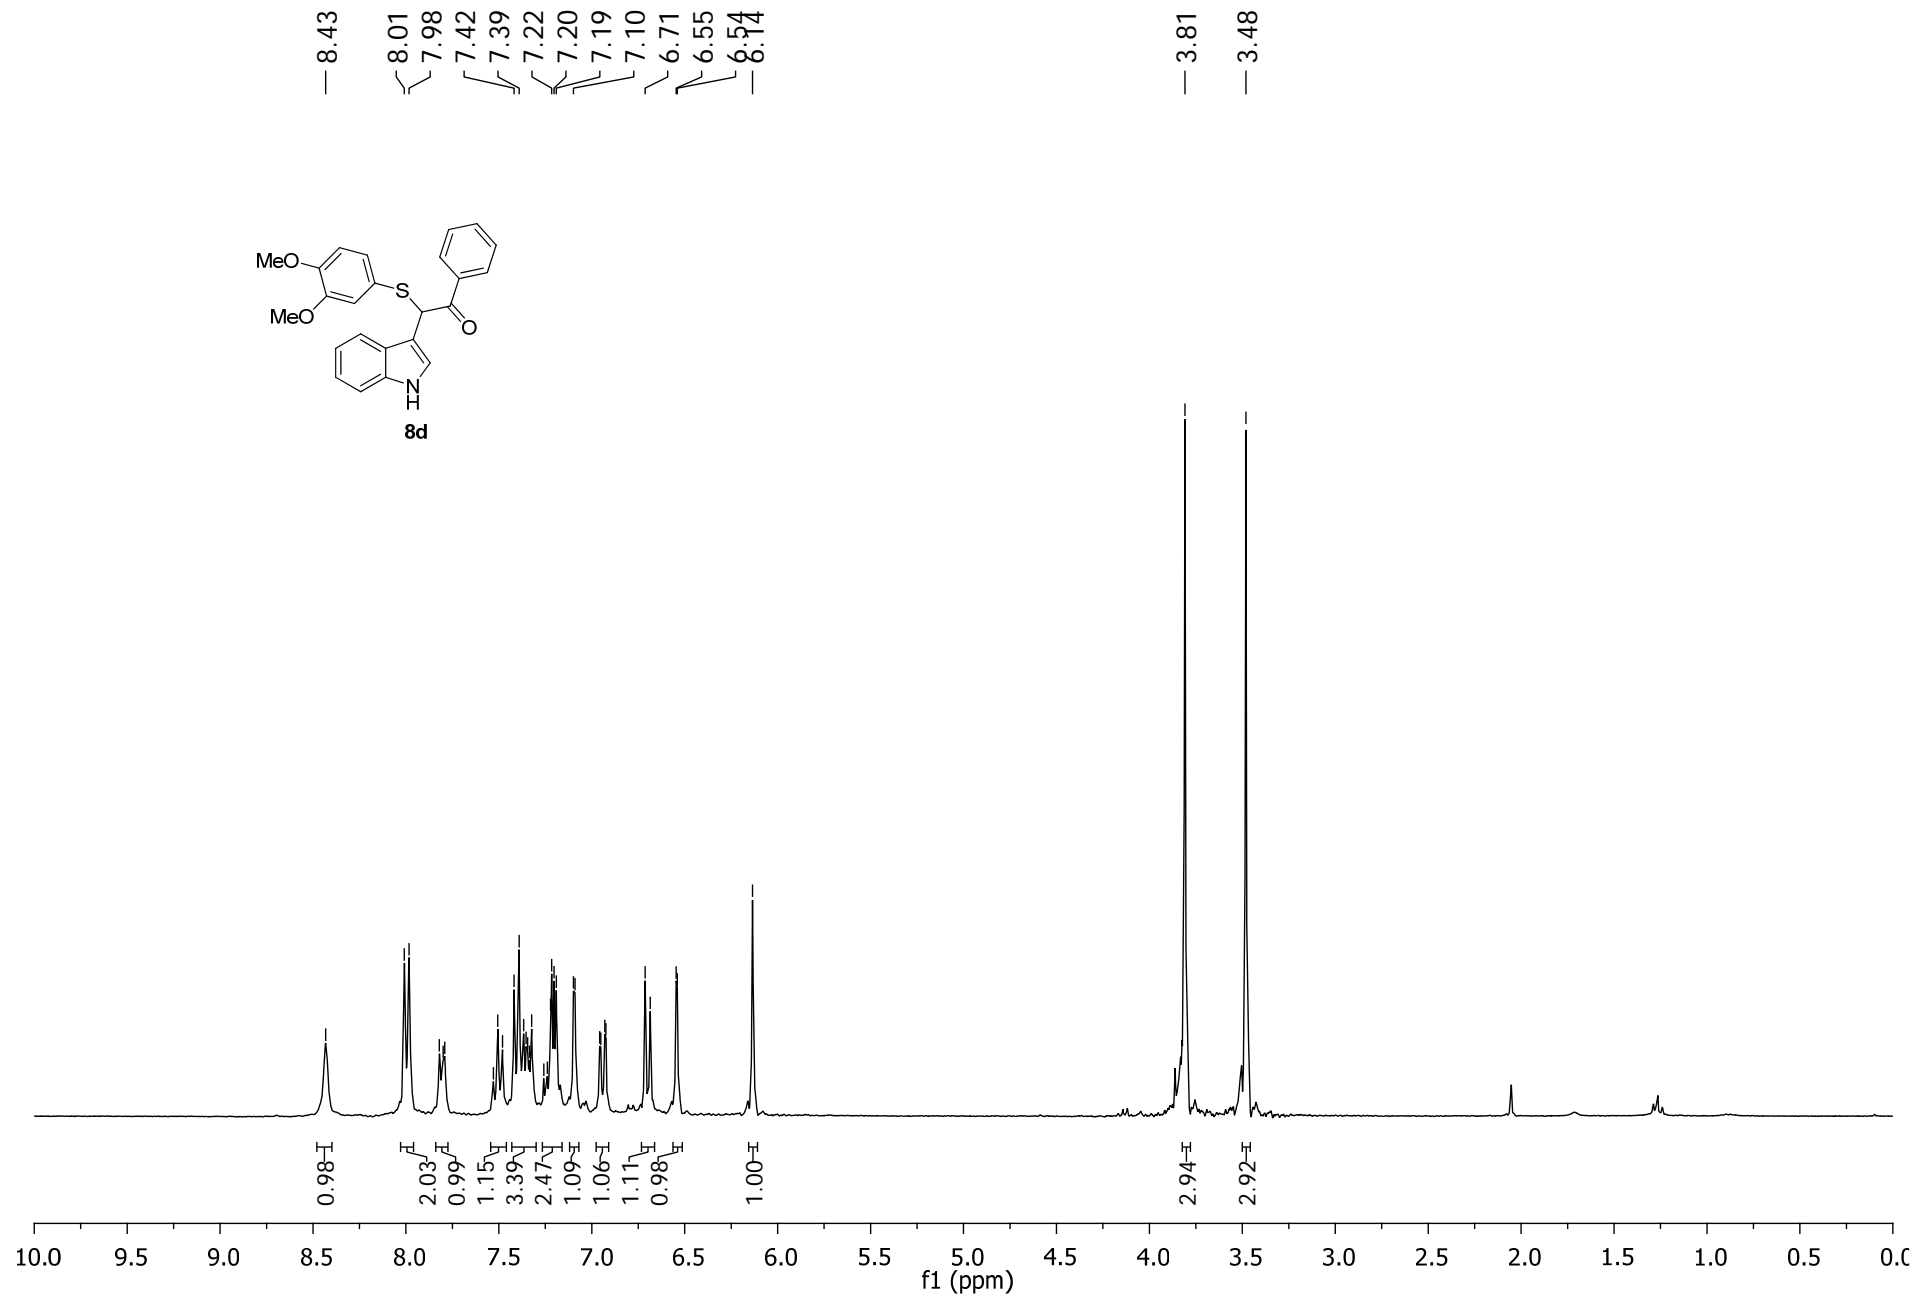

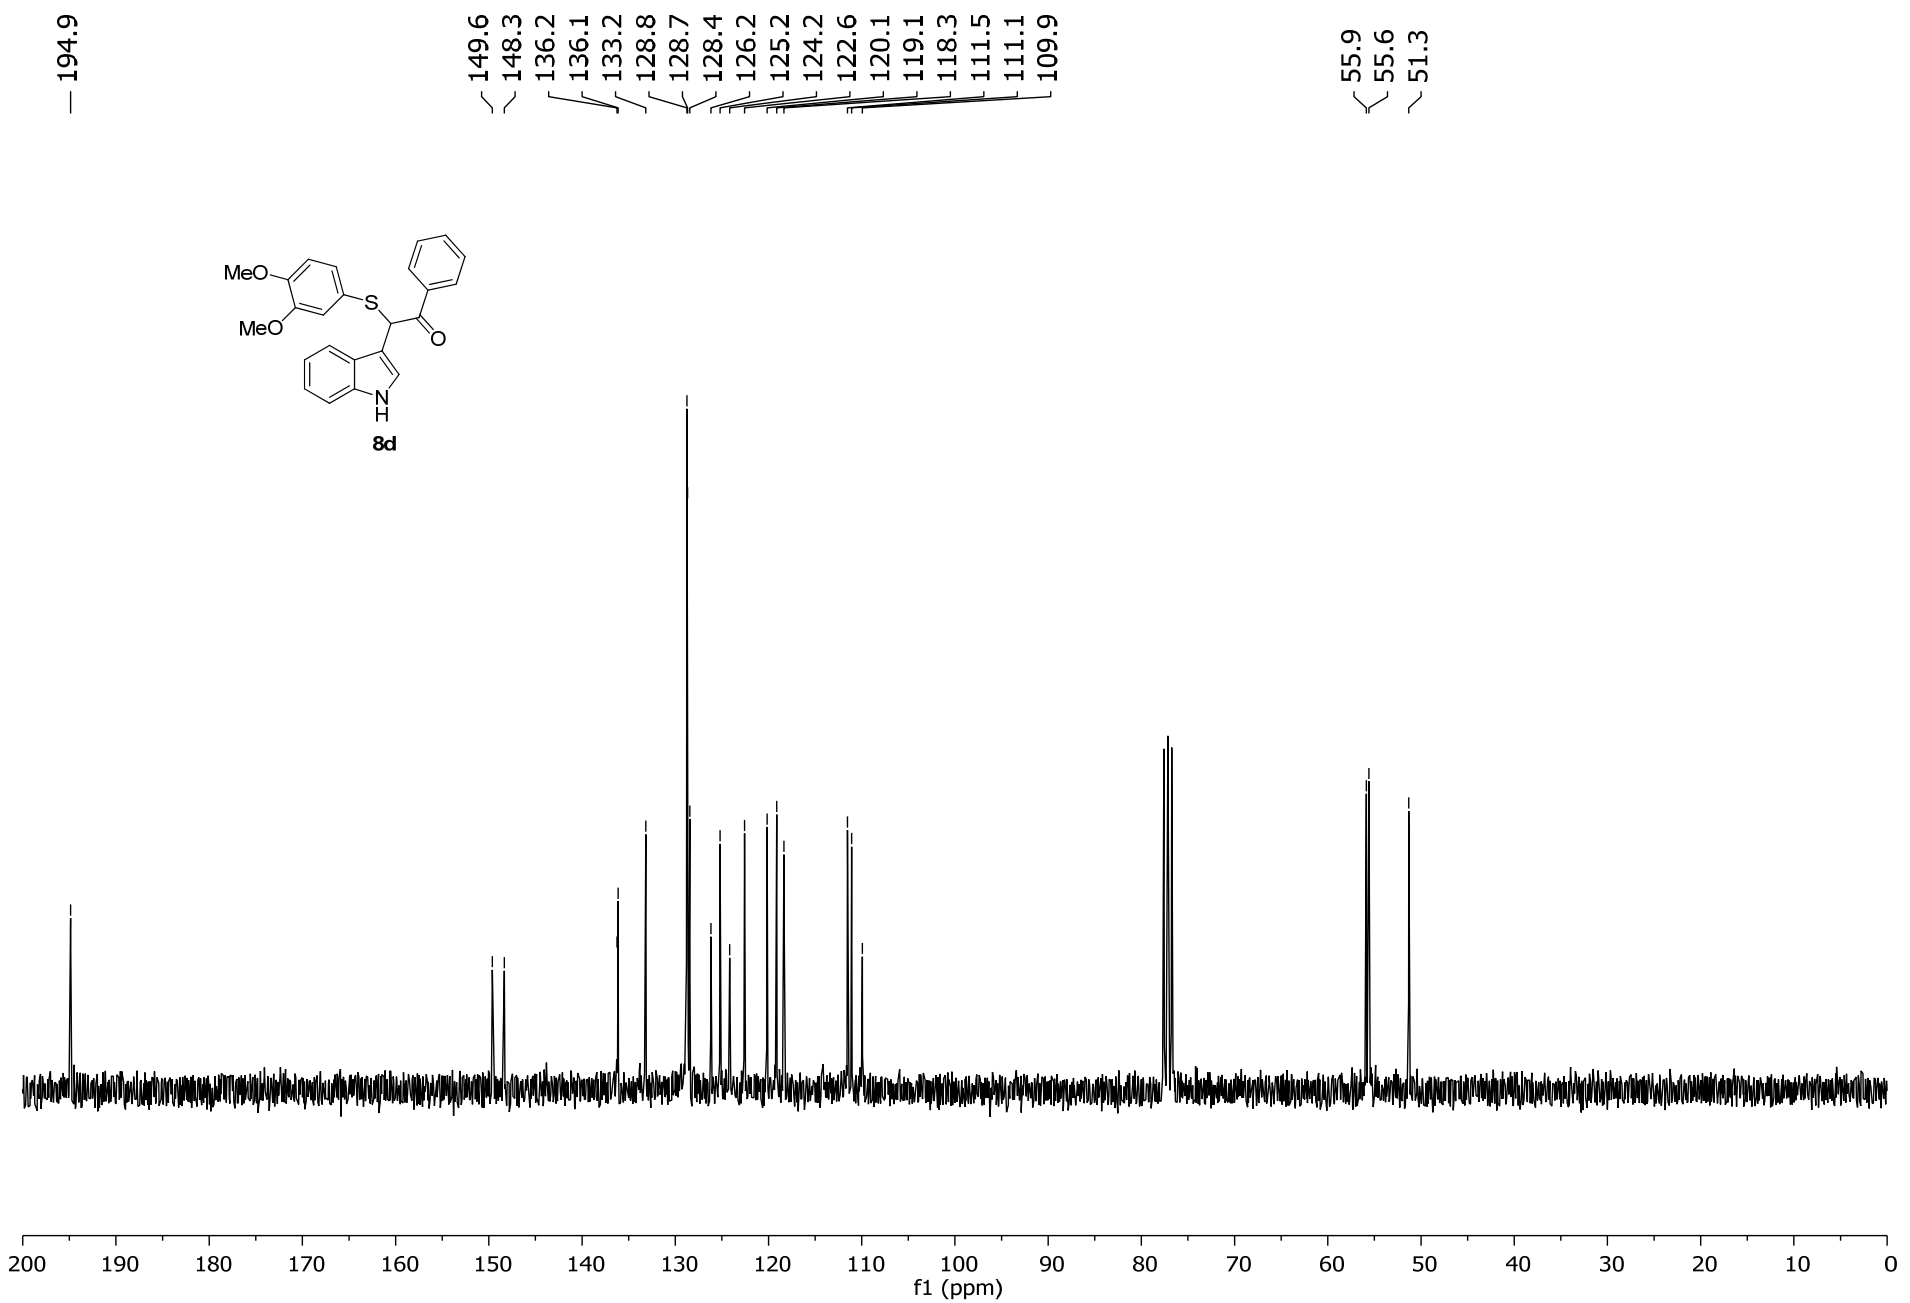

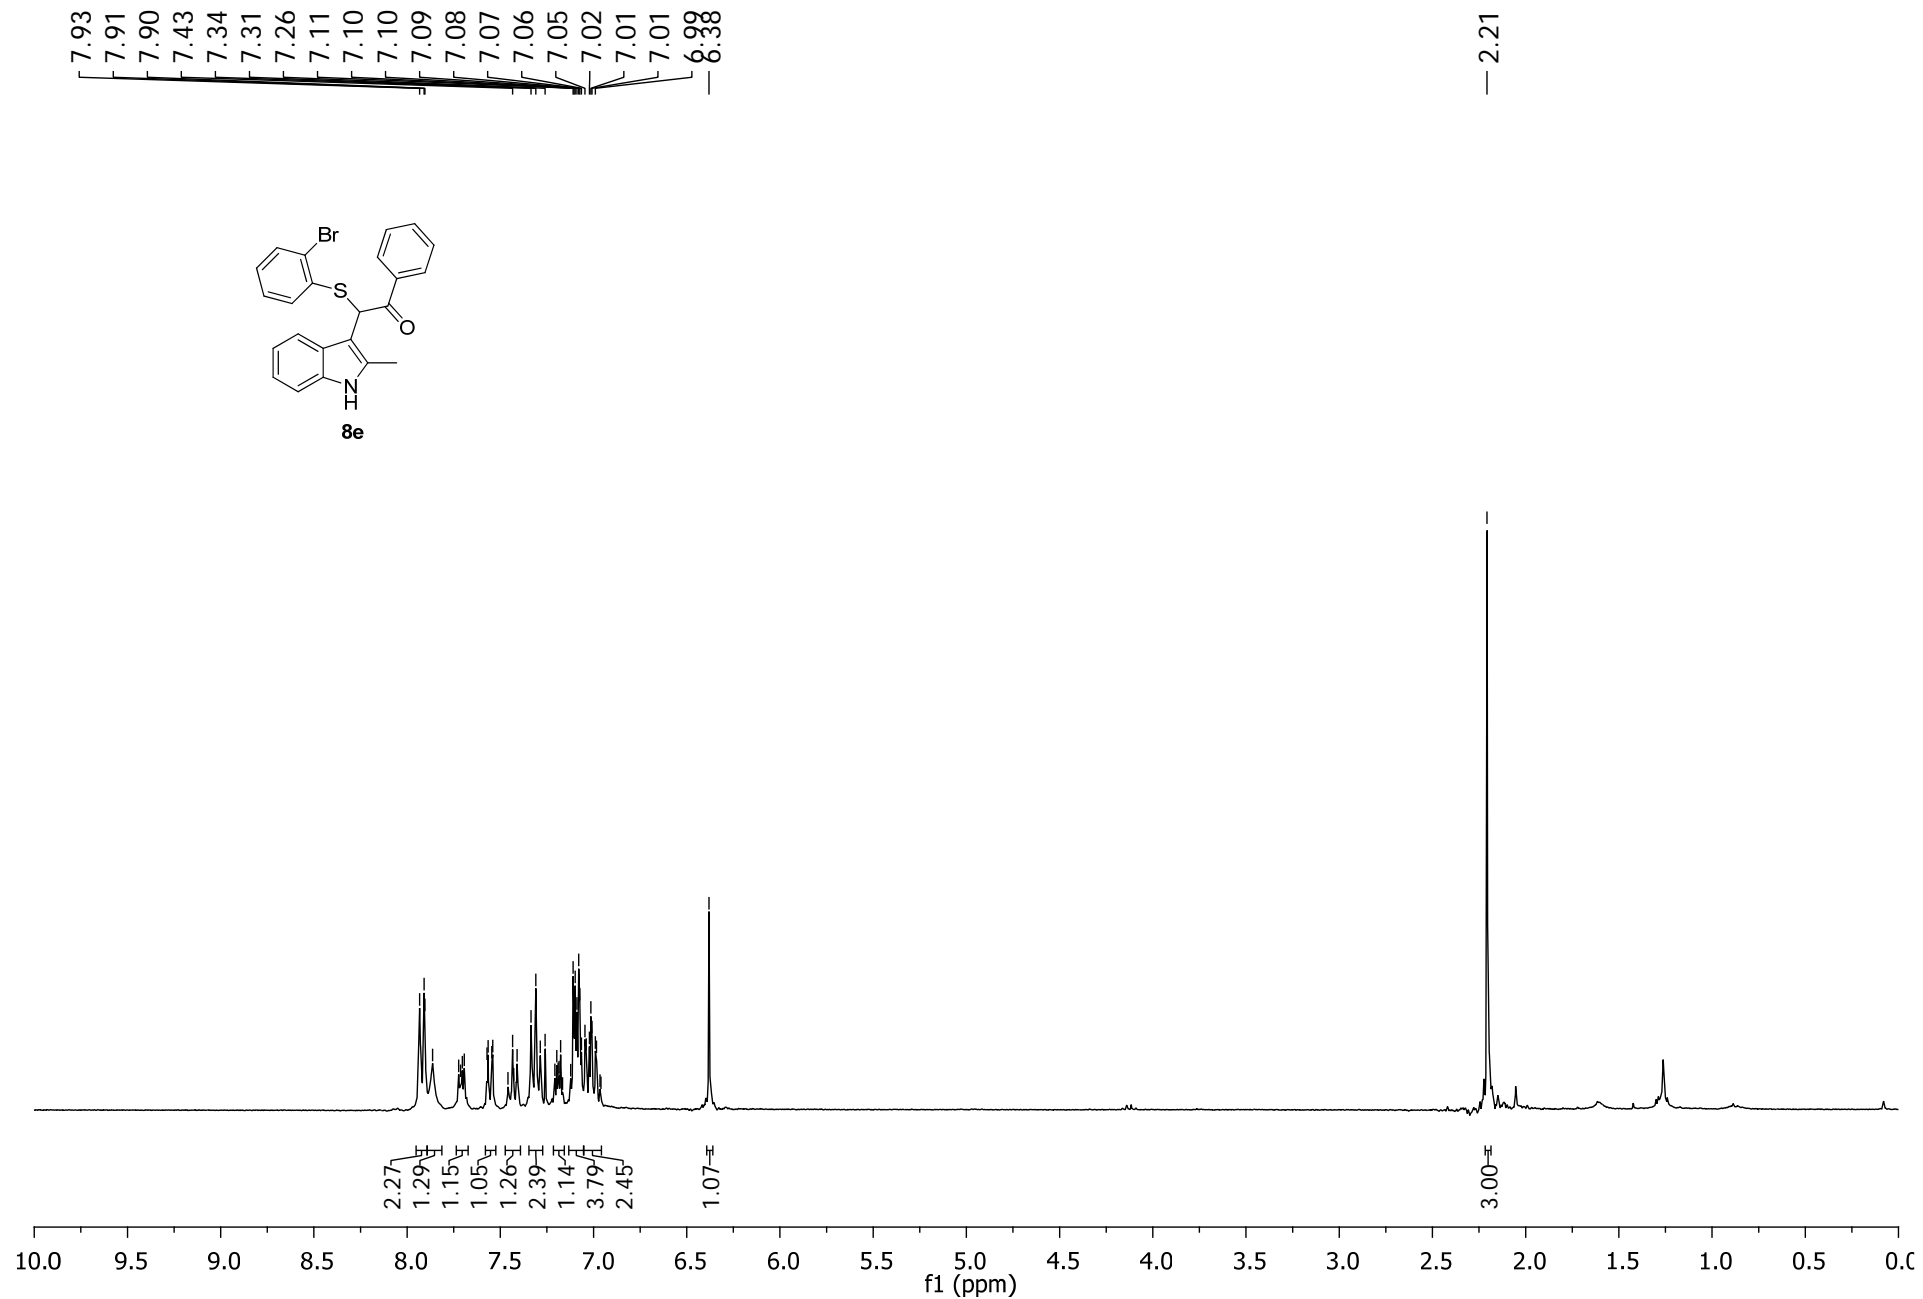



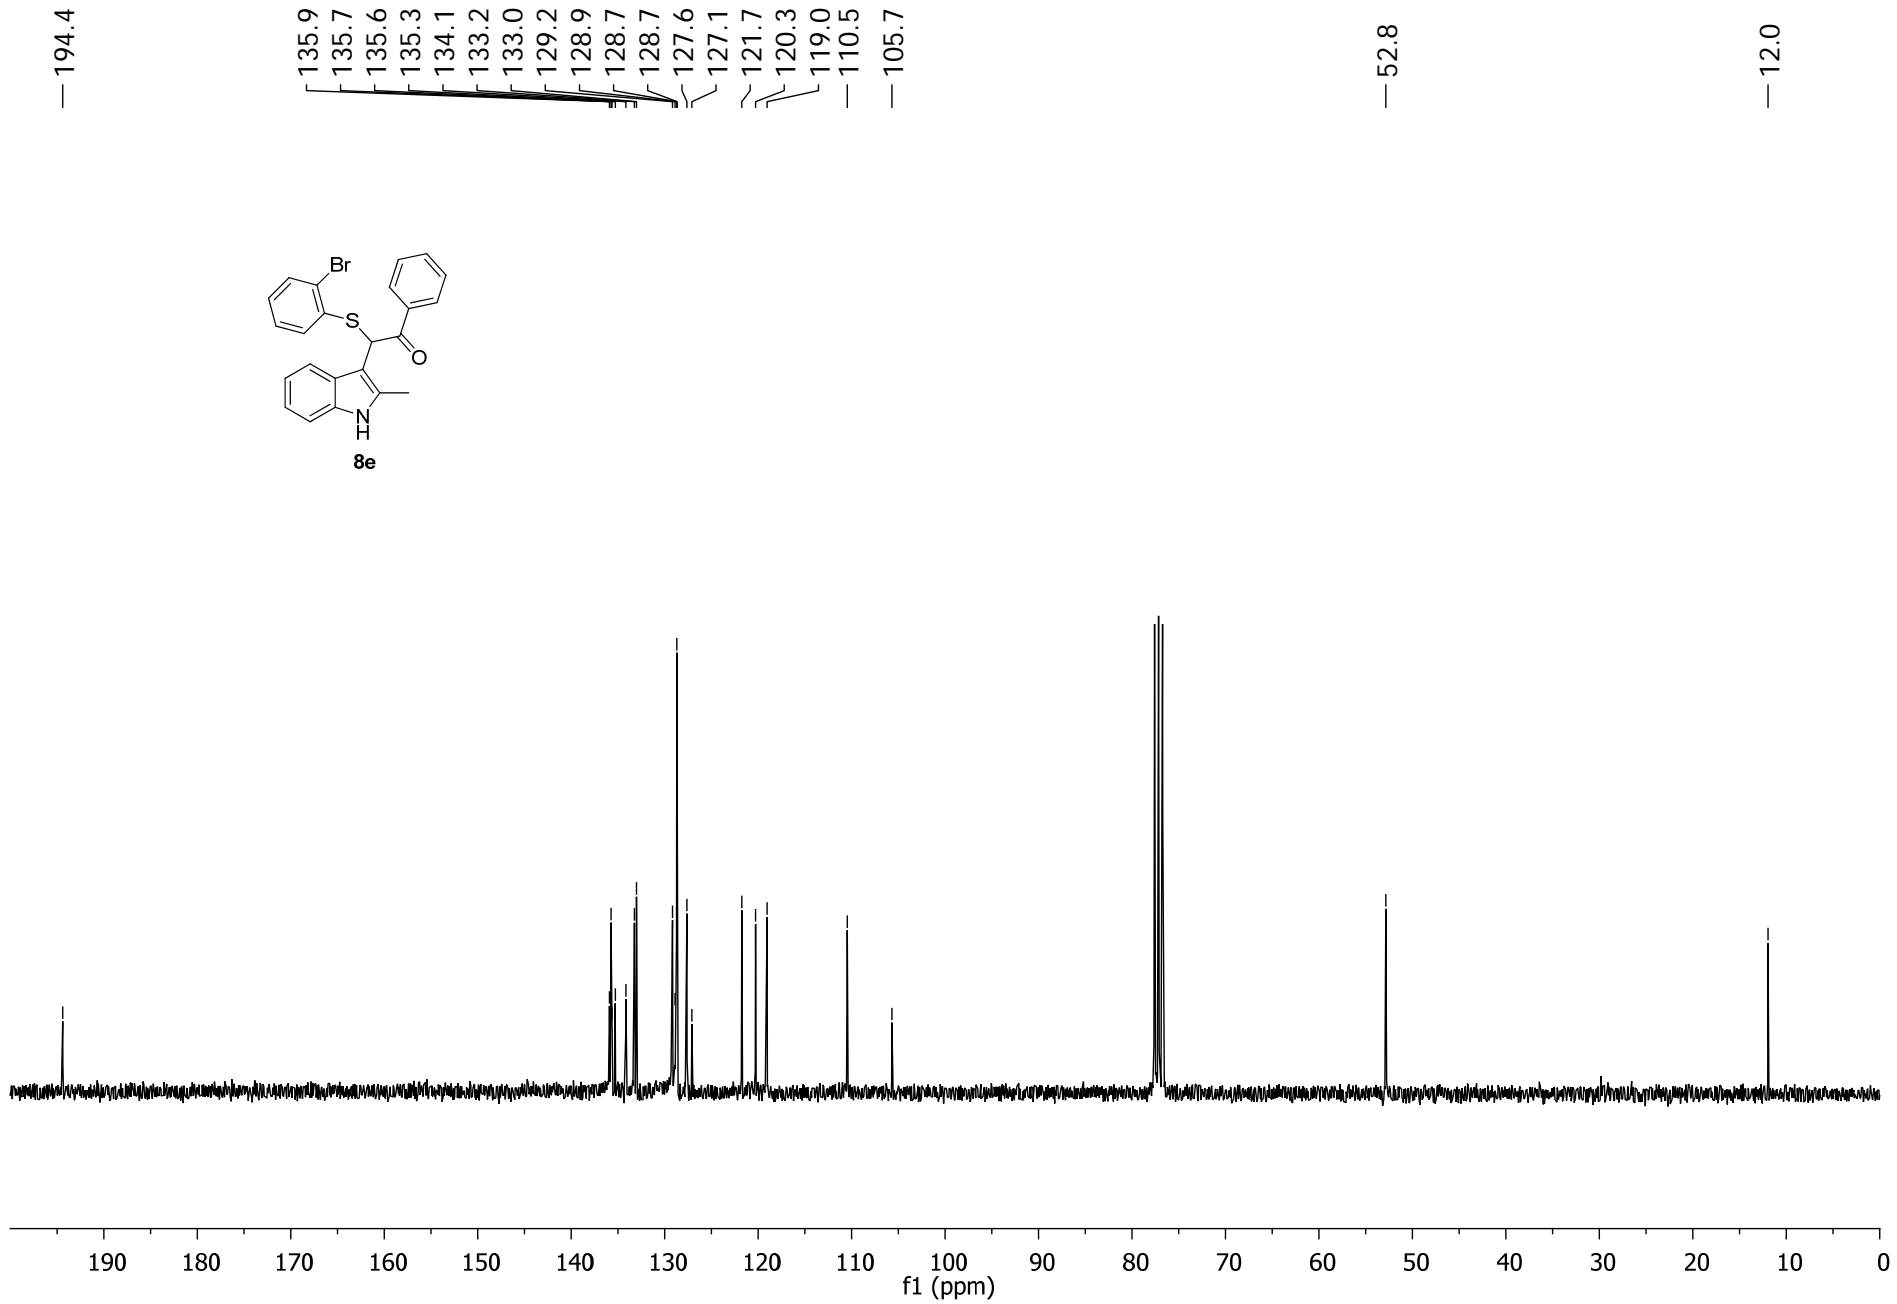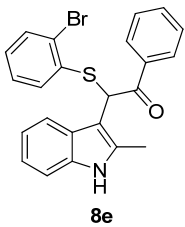

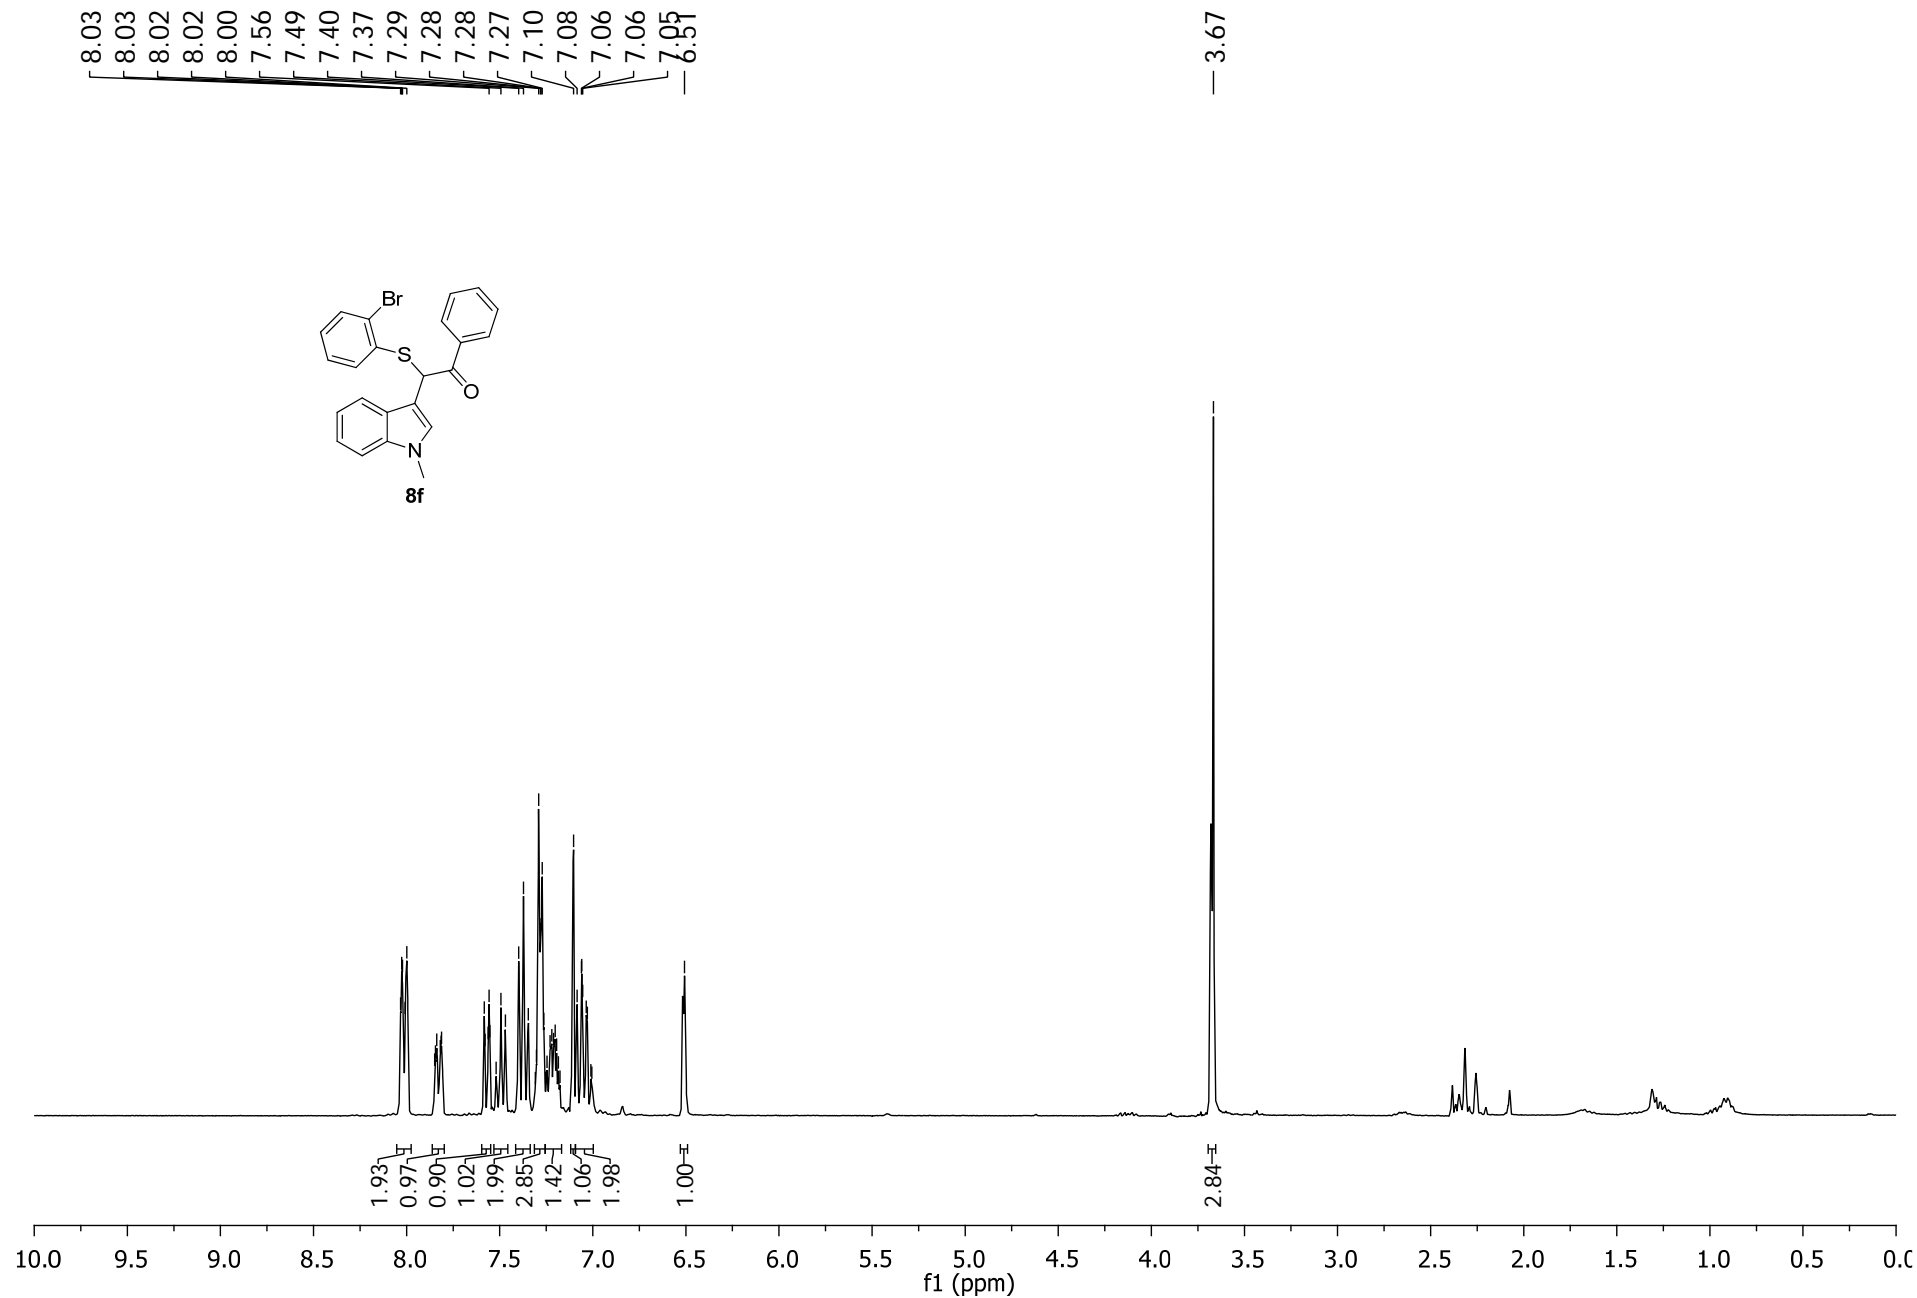

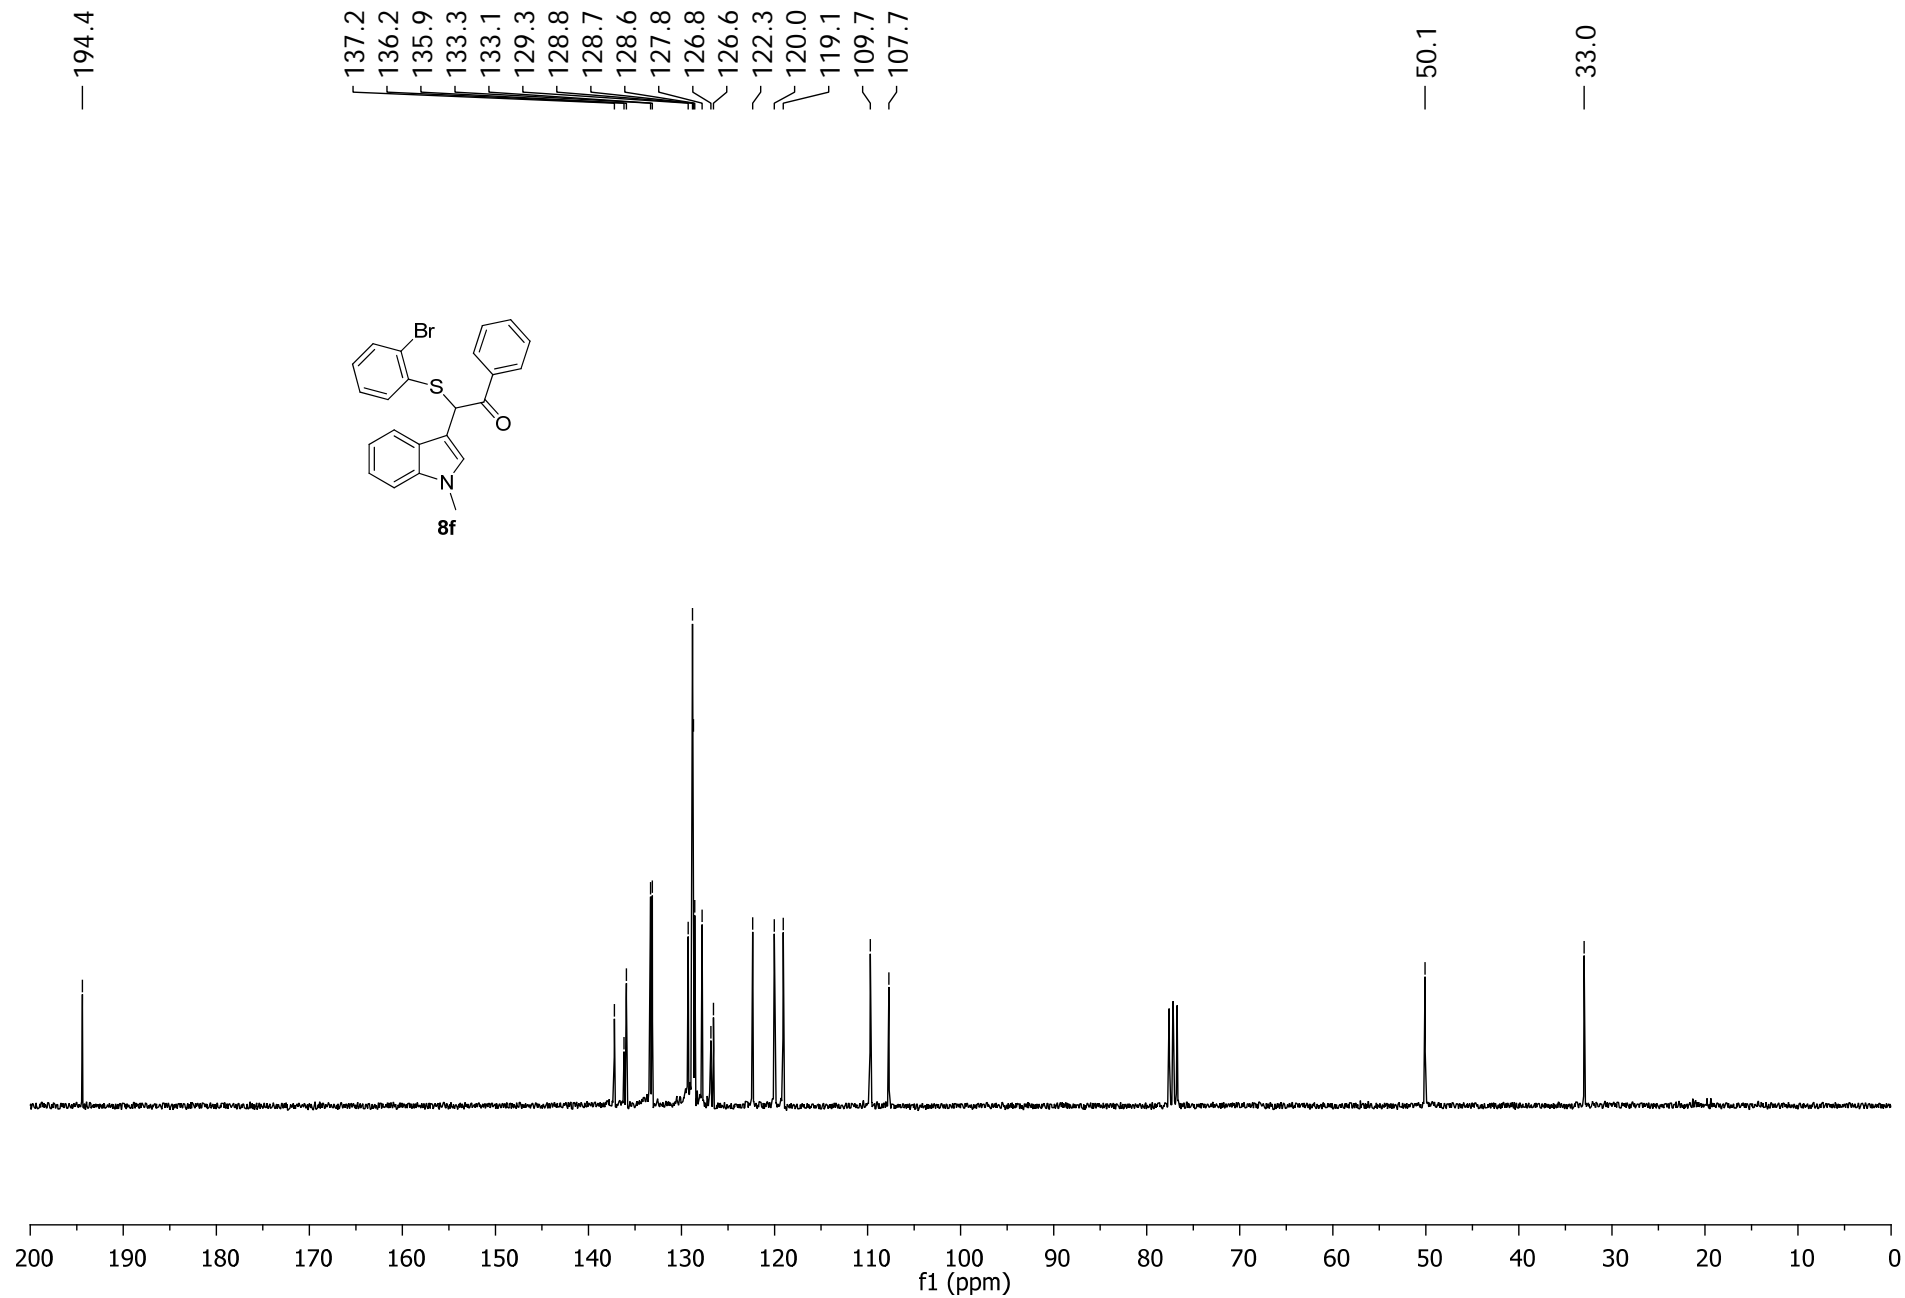

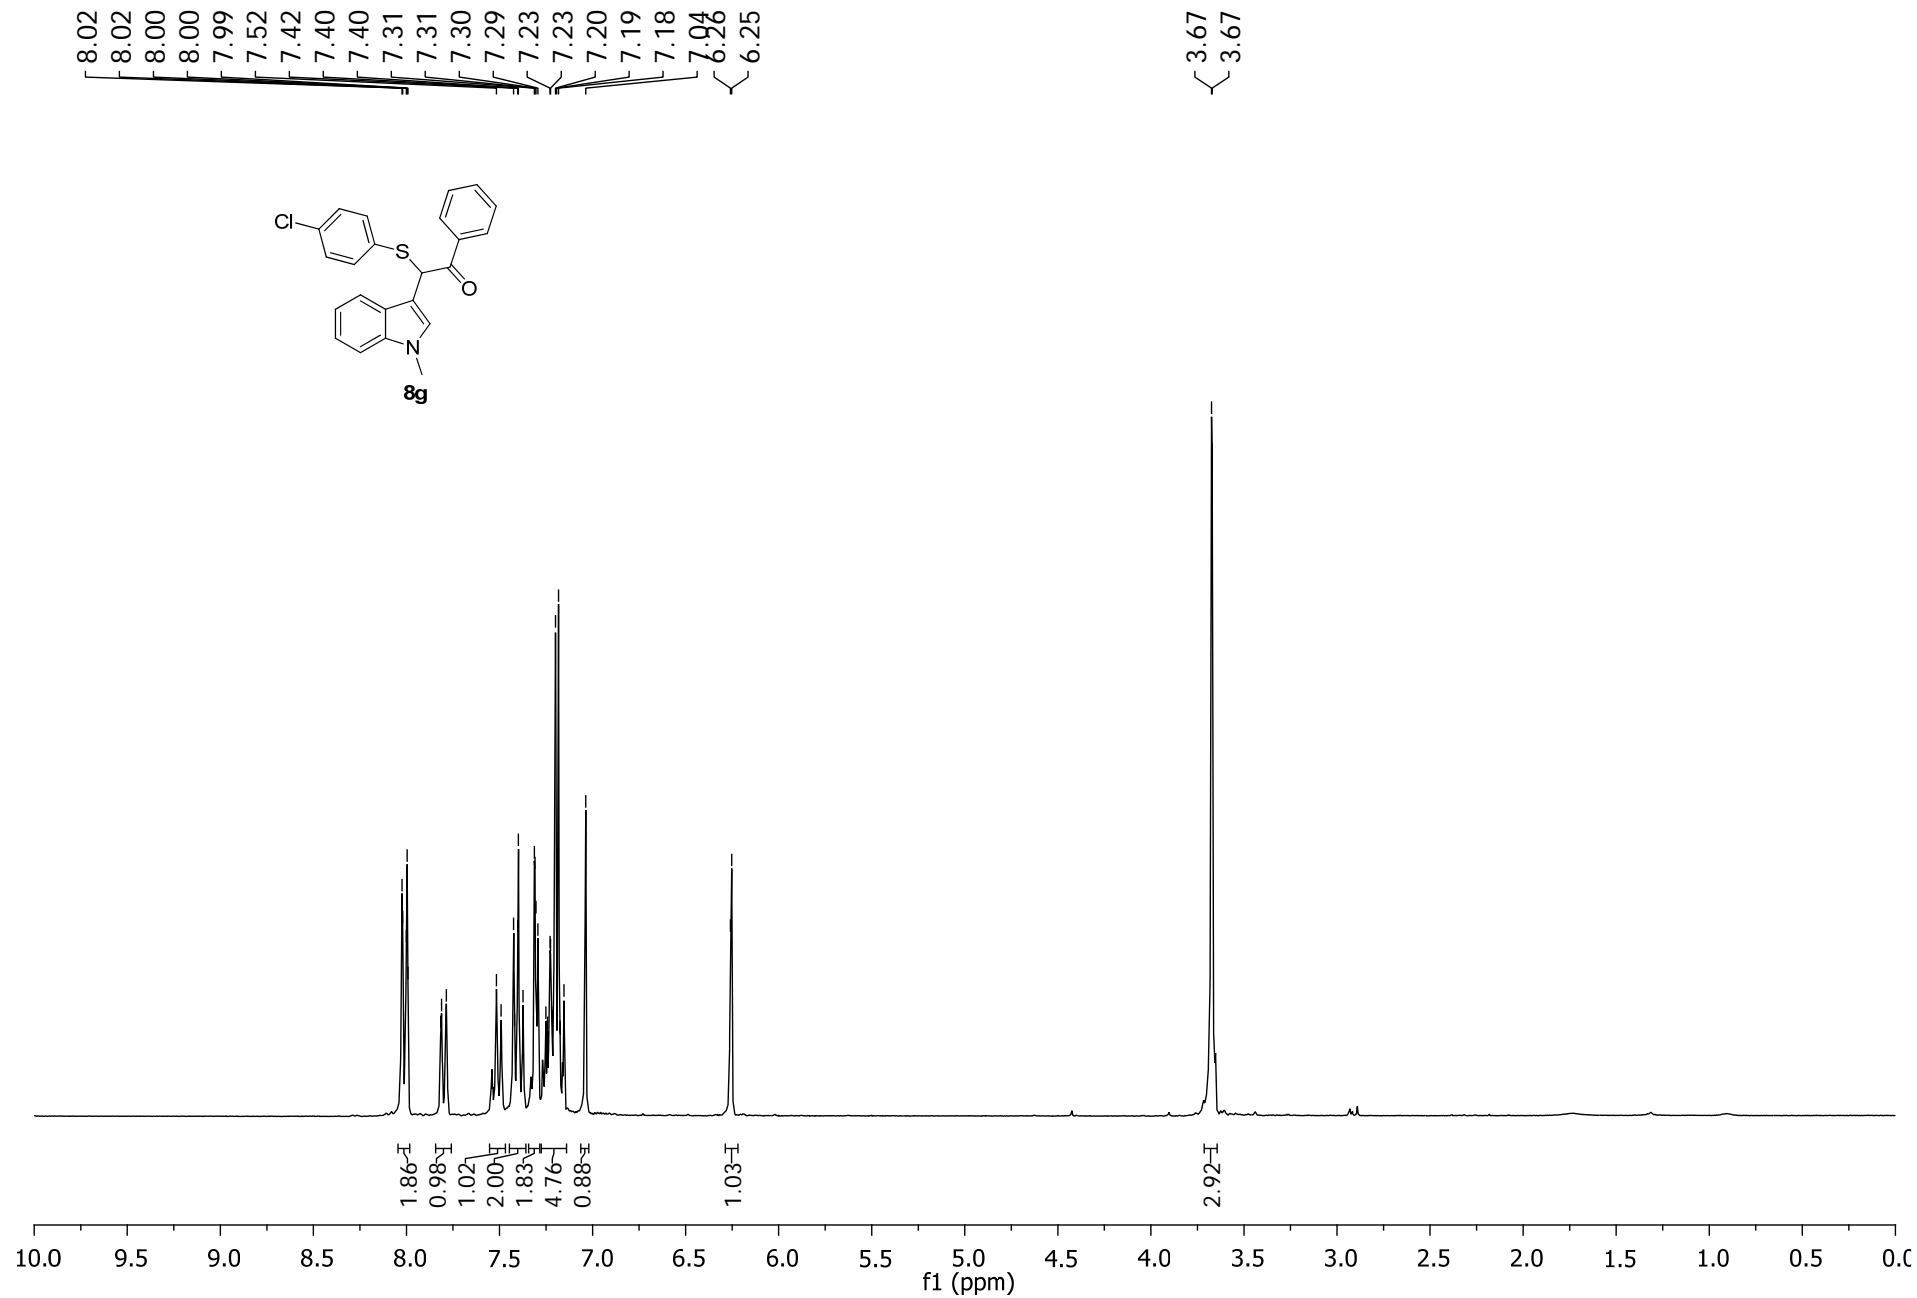

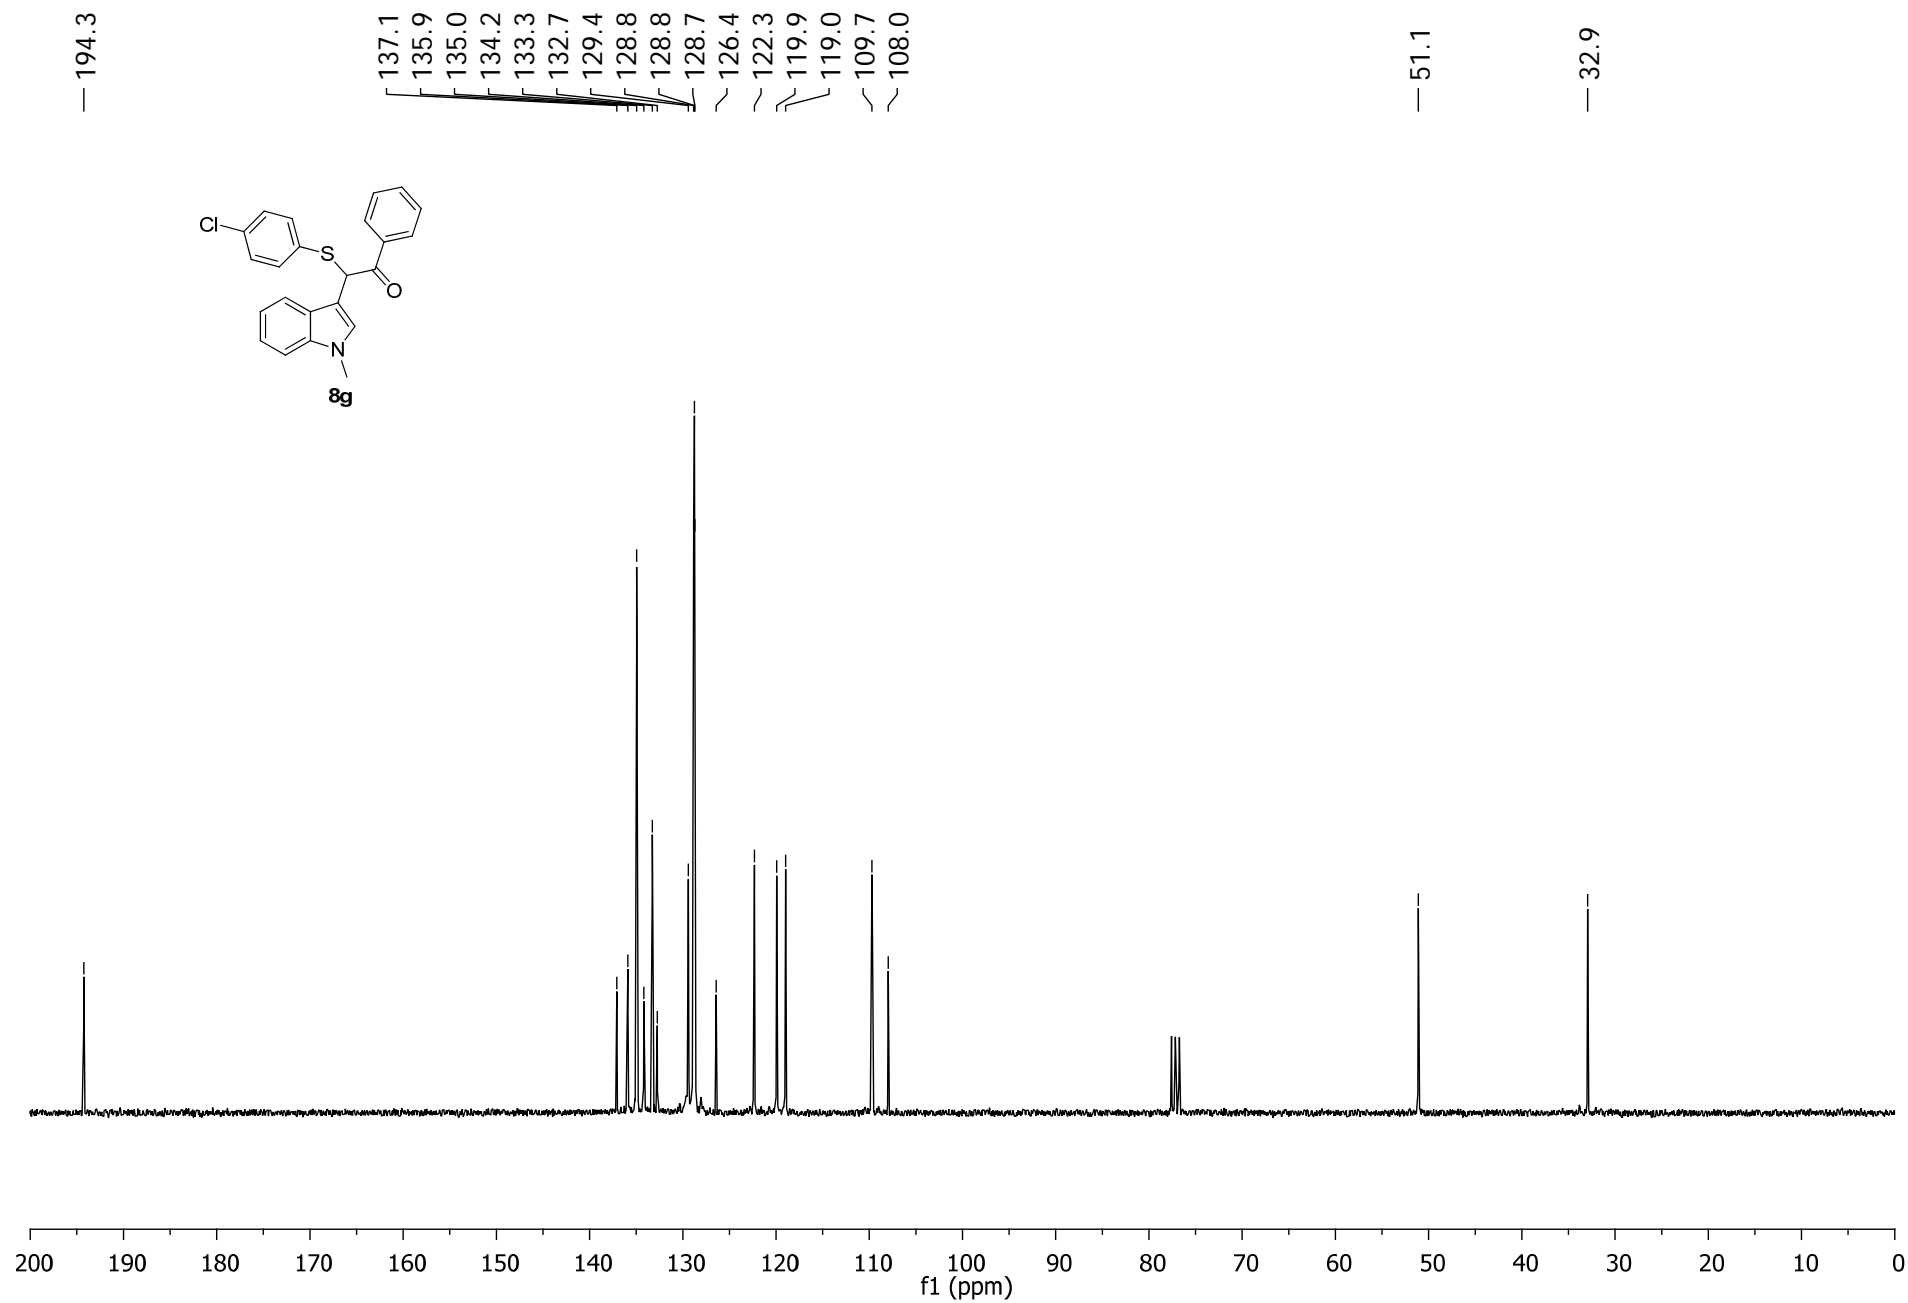

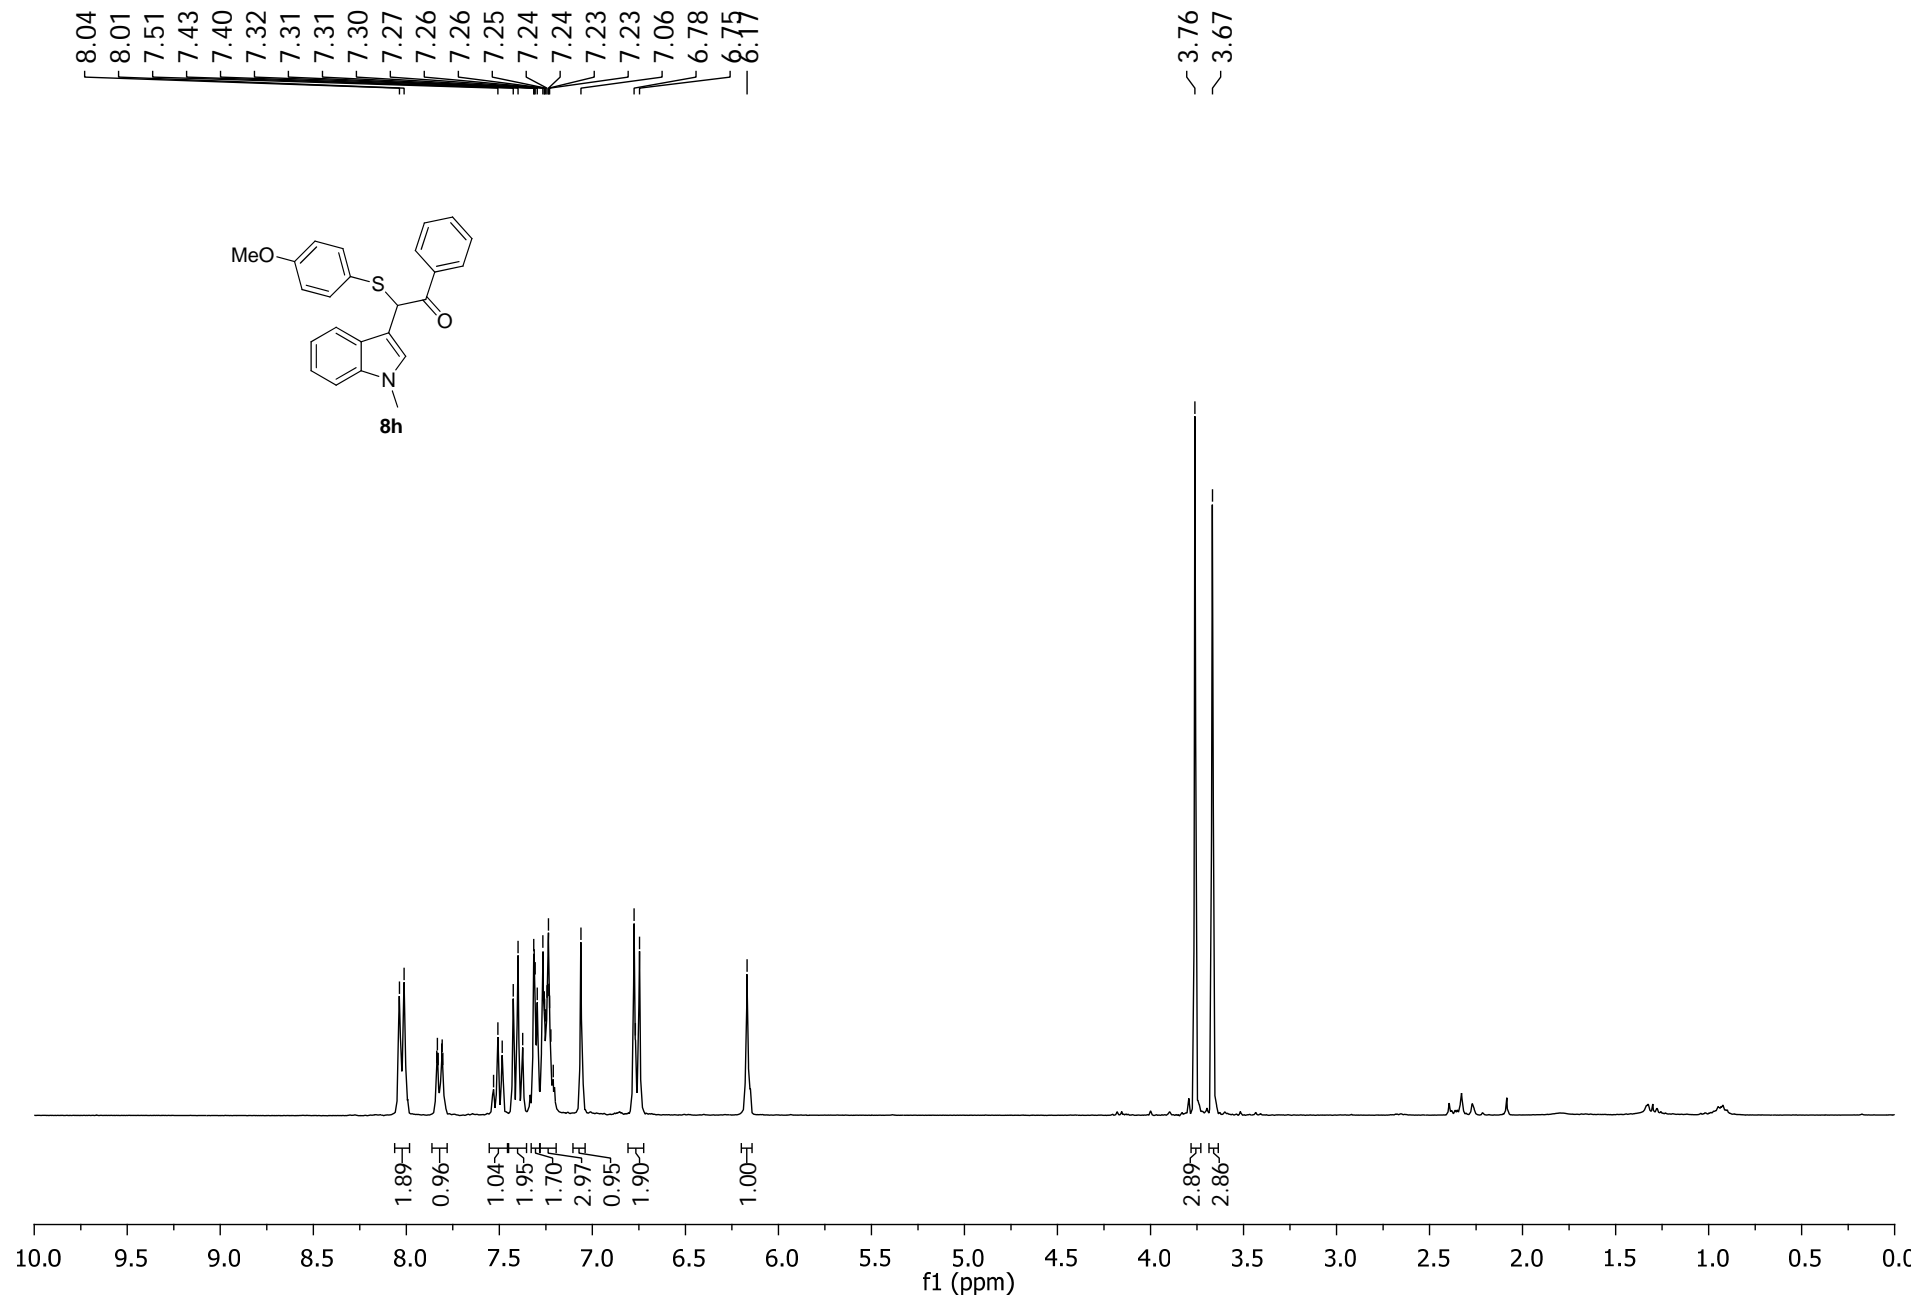

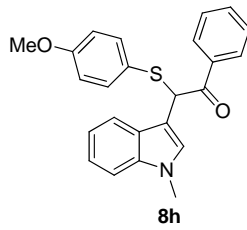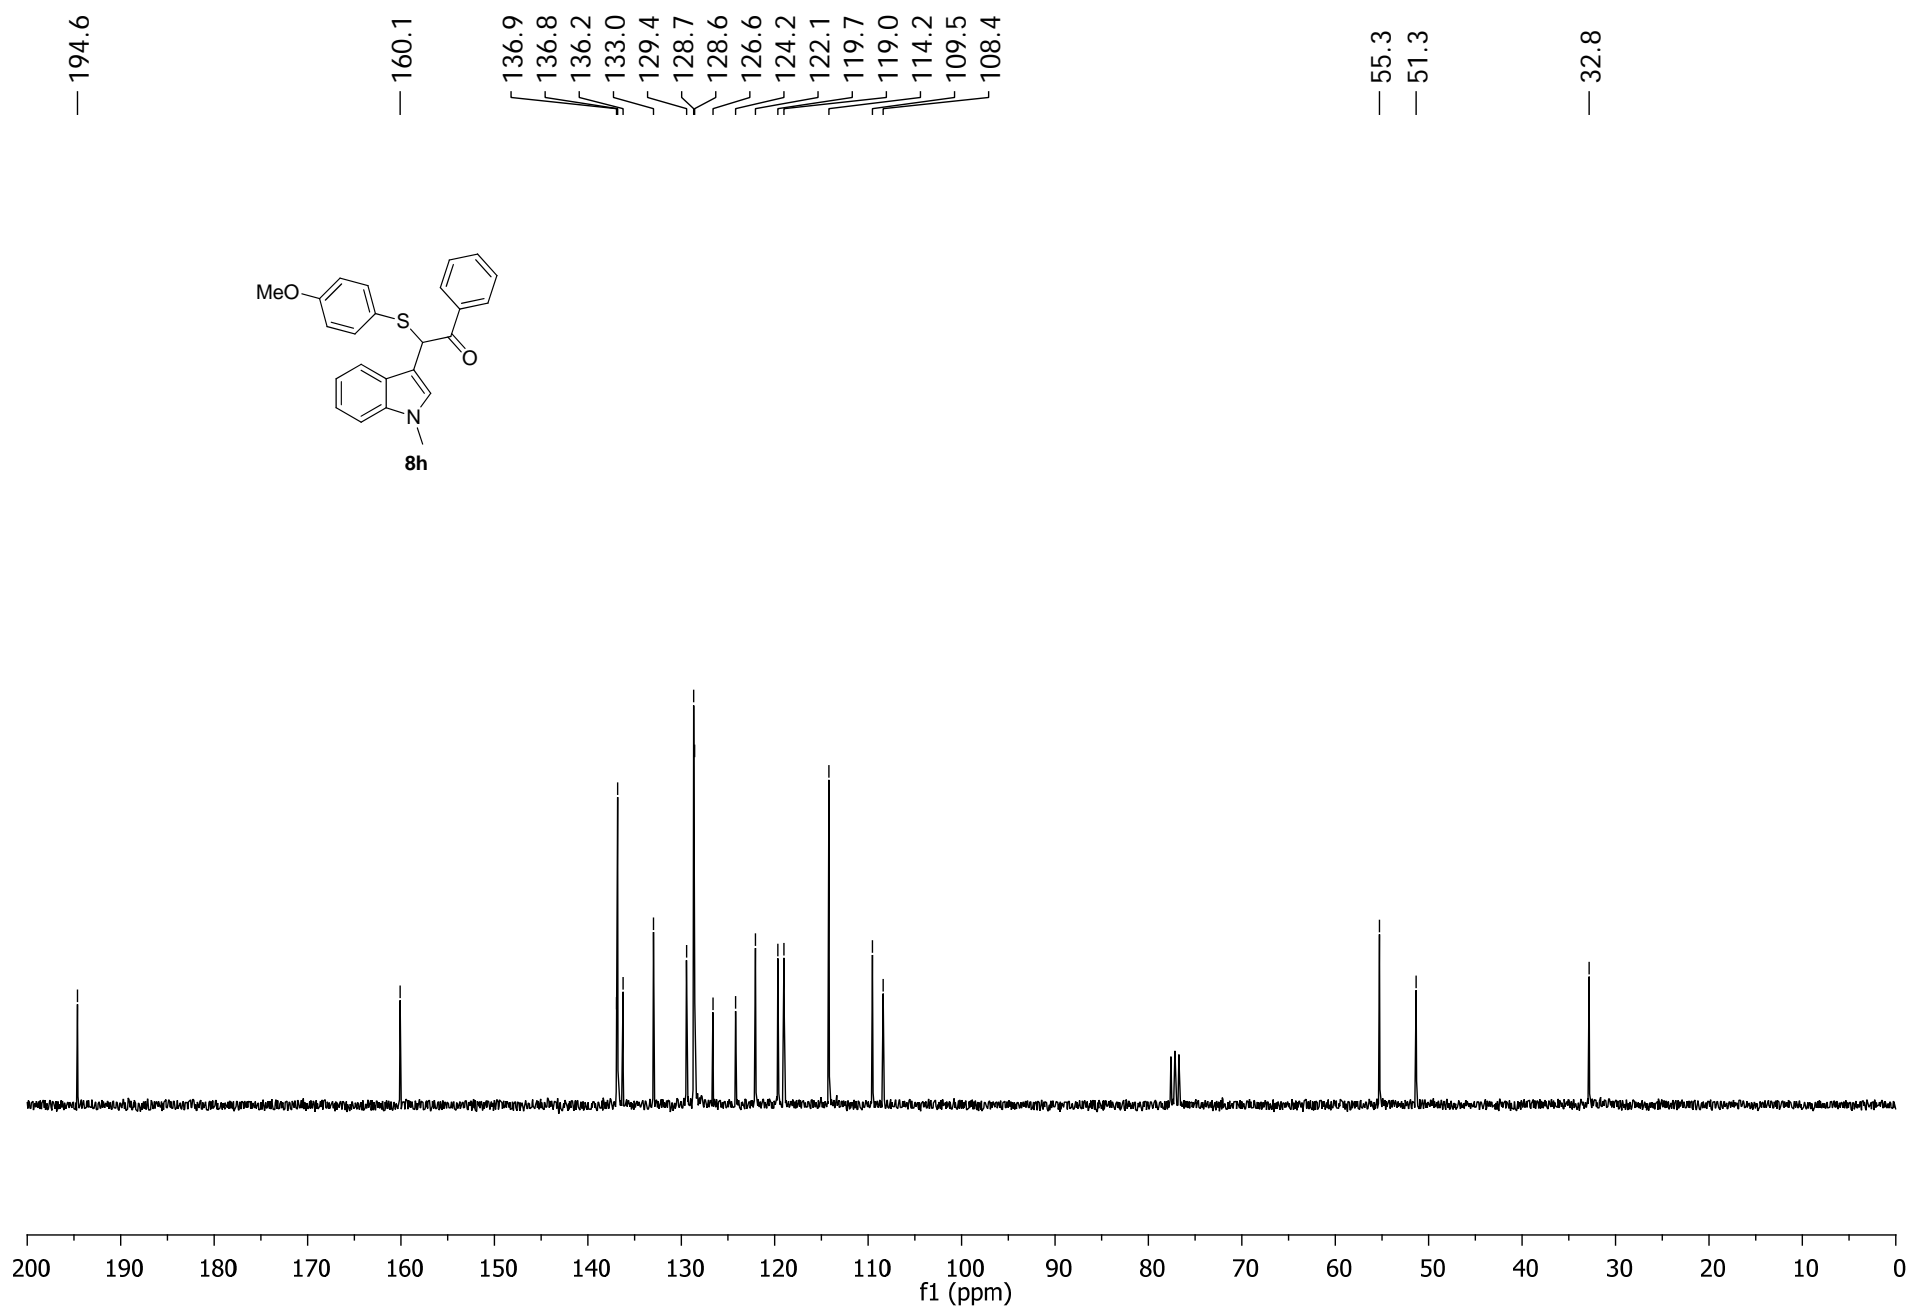

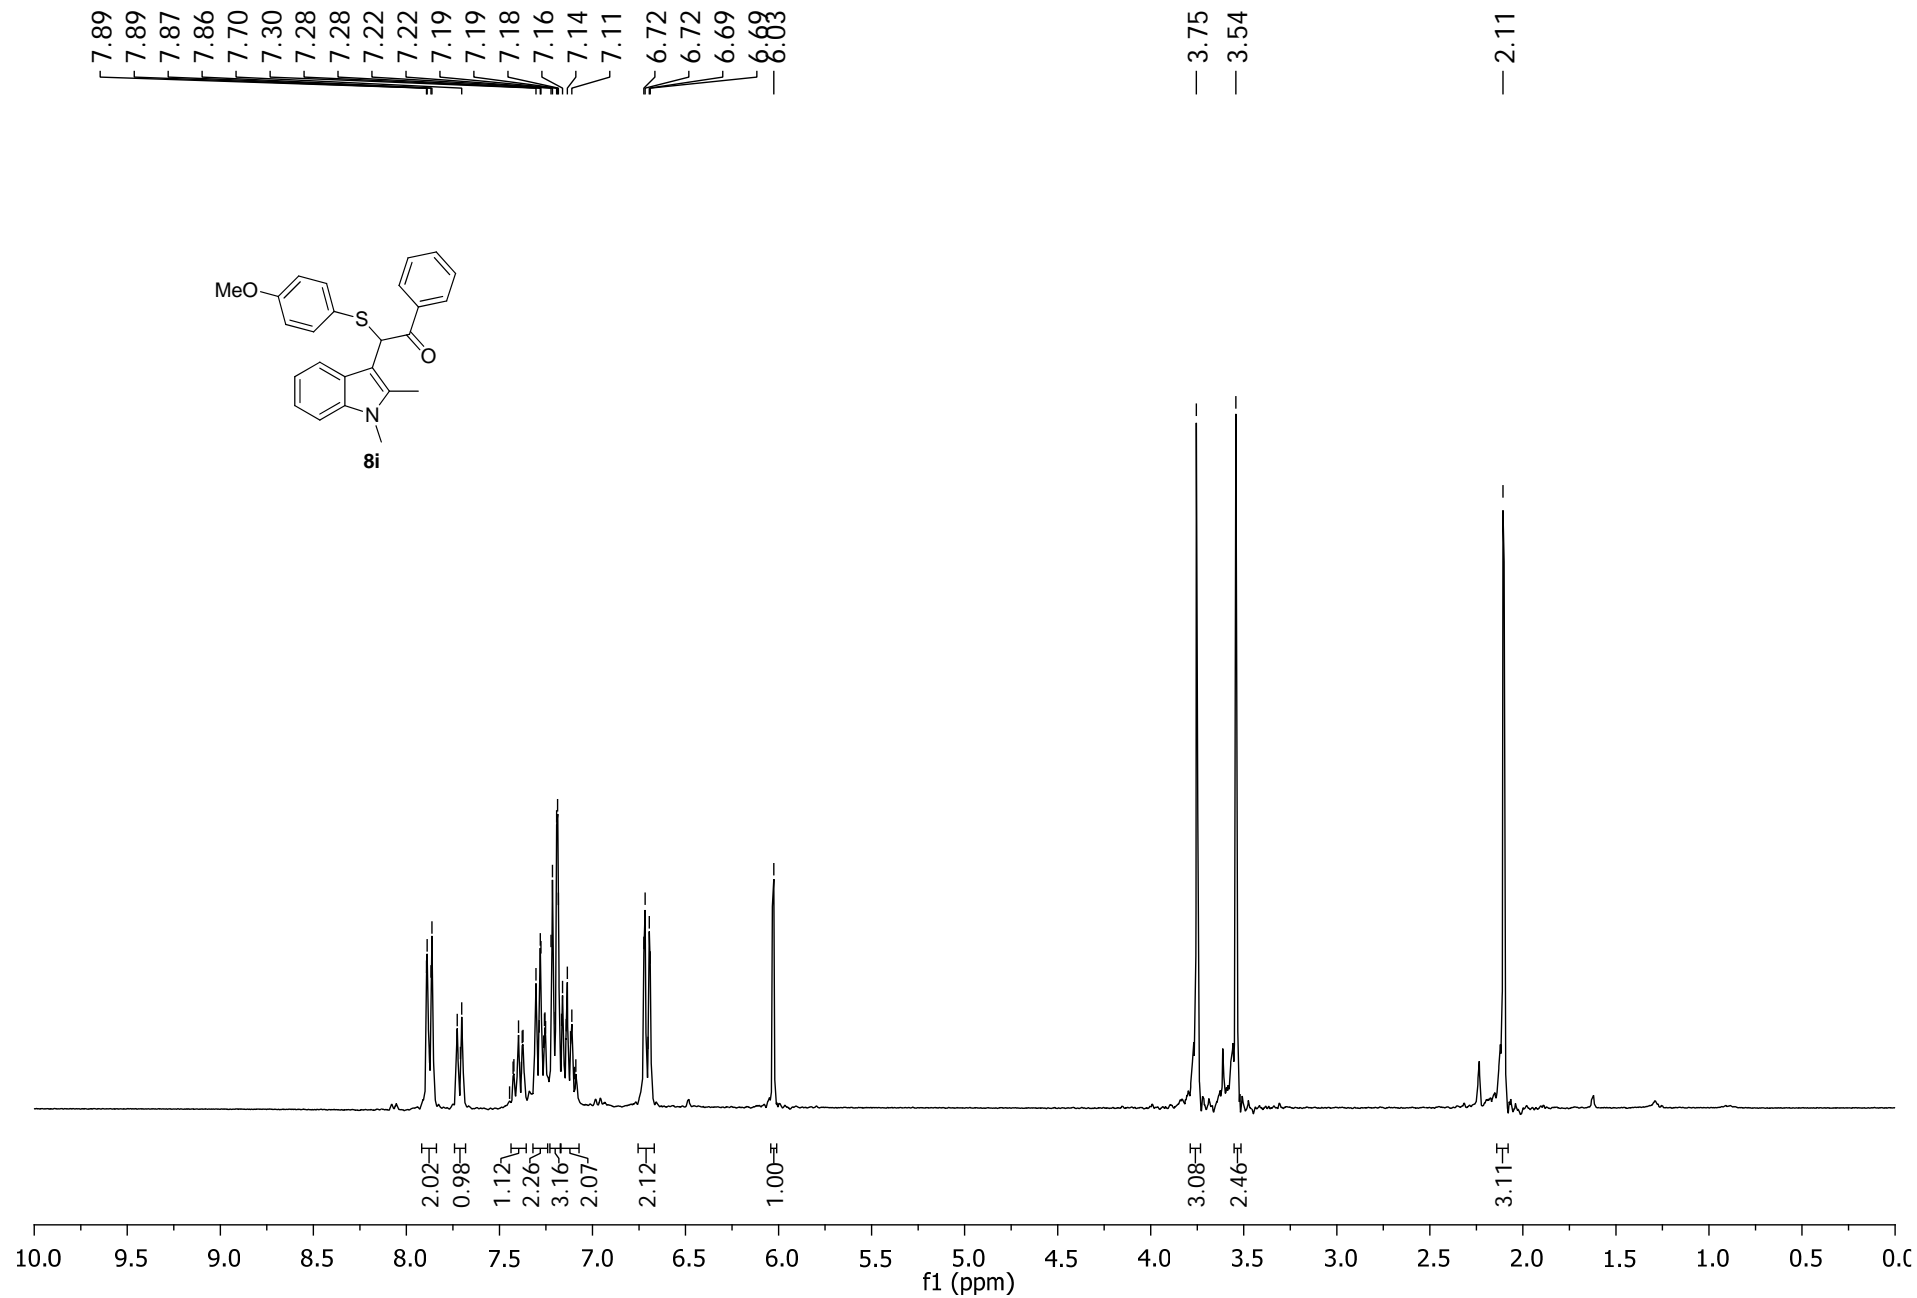



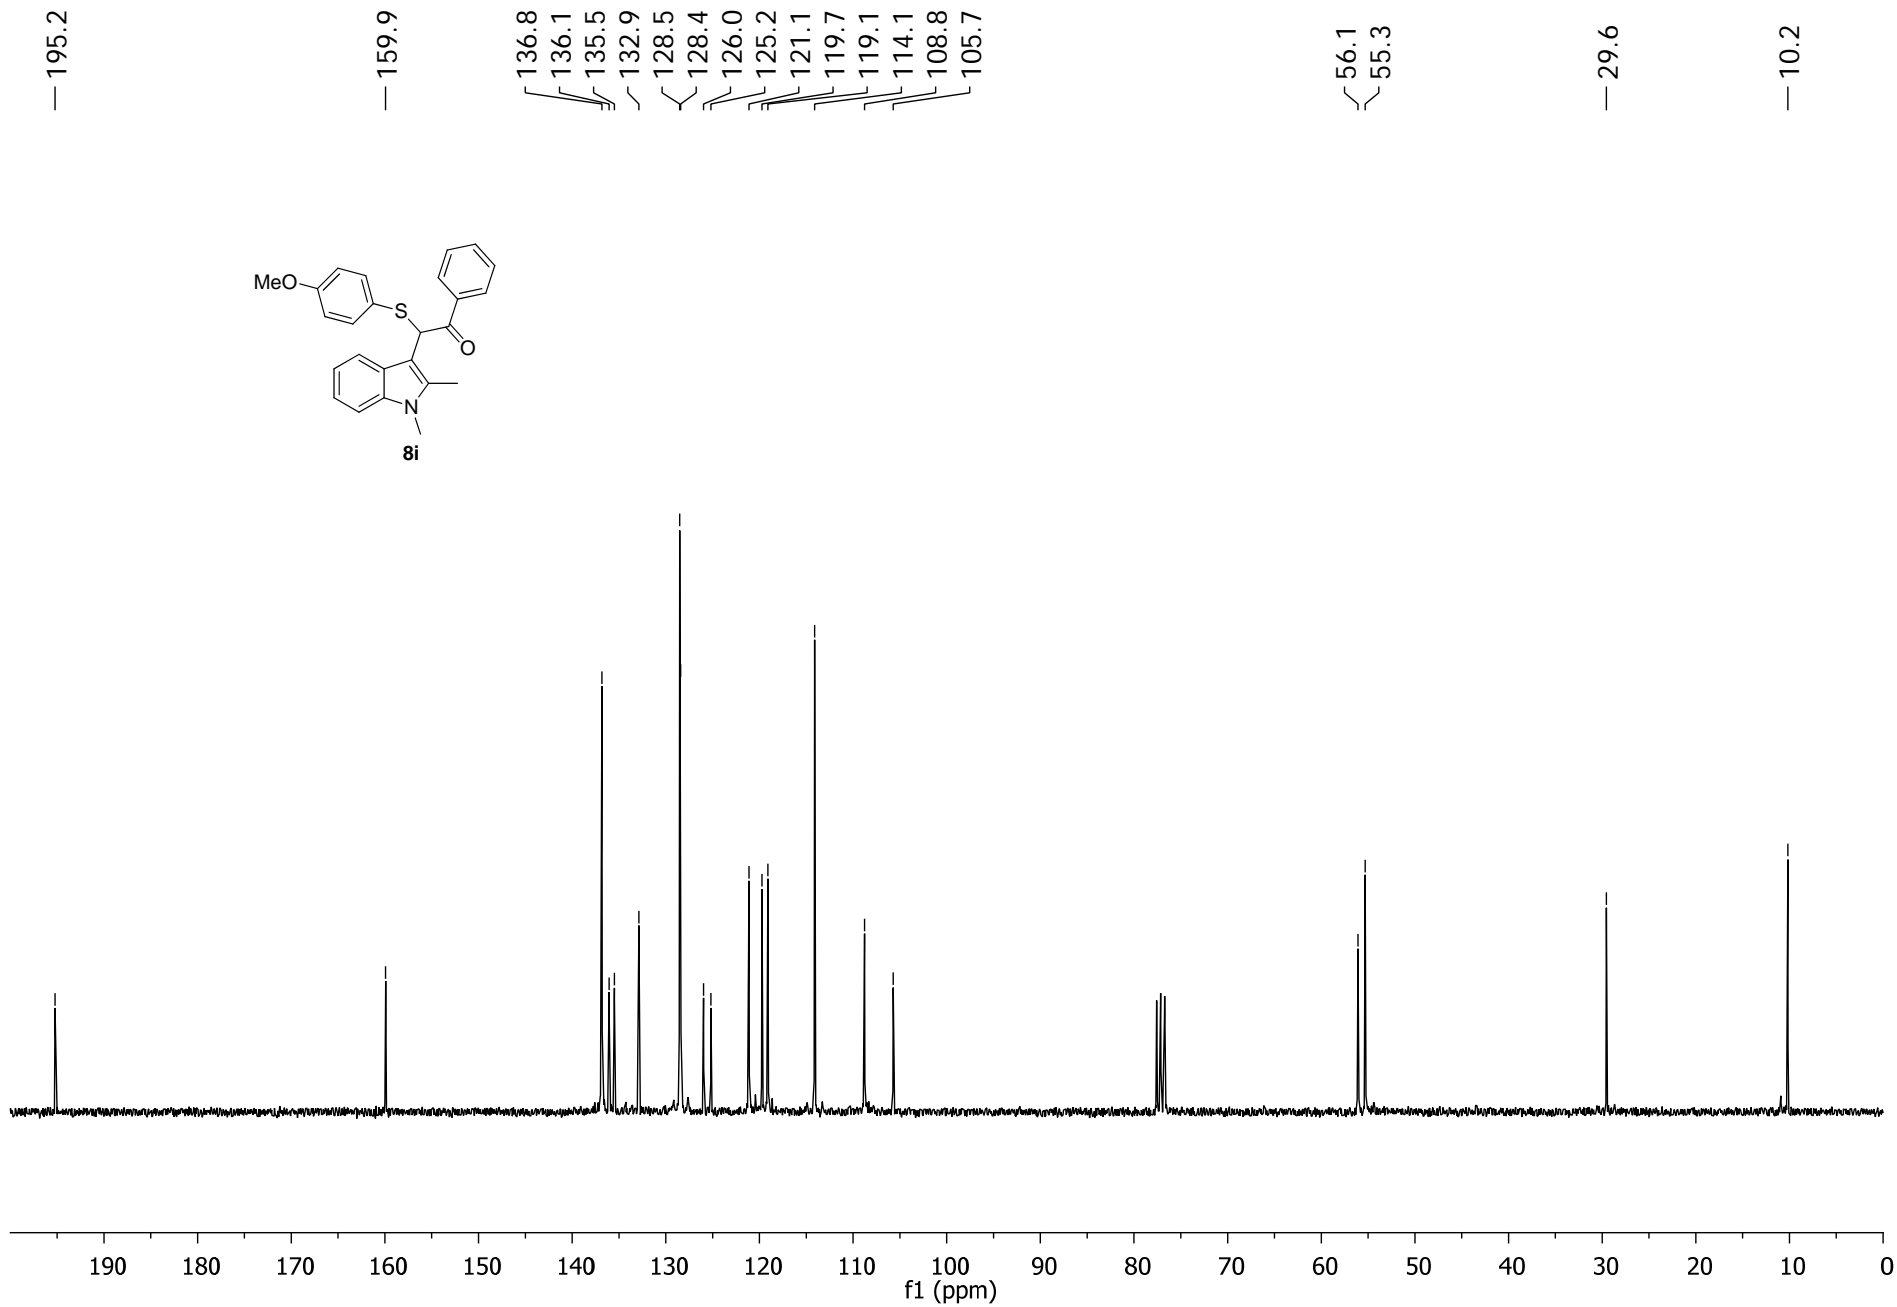

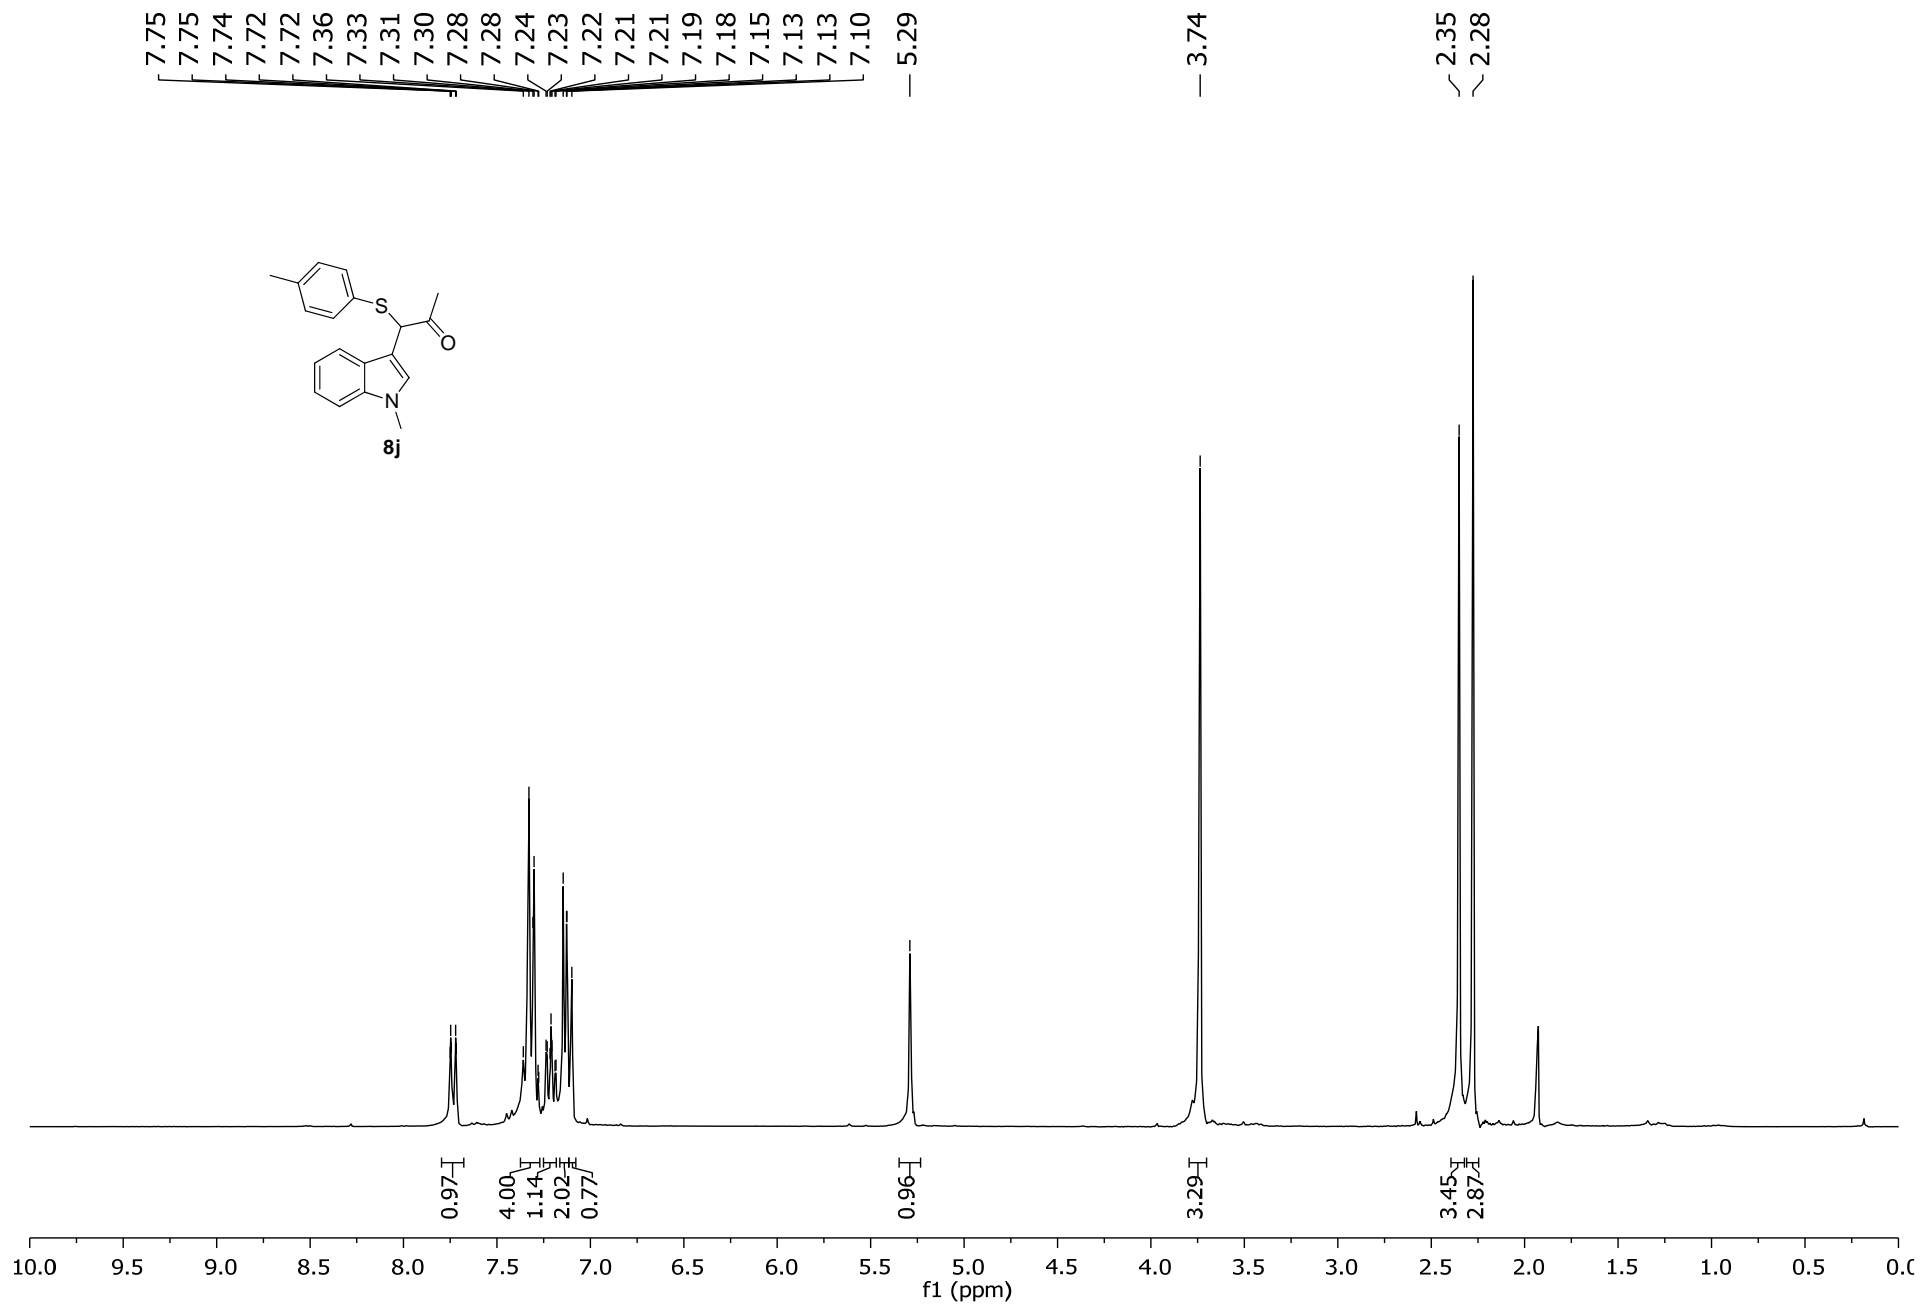

— 203.3

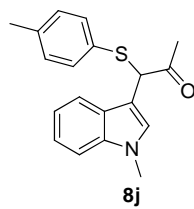

138.0  
137.0  
133.0  
130.2  
129.7  
128.4  
126.6  
122.2  
119.7  
119.1  
109.5  
107.9

— 56.0

32.8  
26.8  
21.1

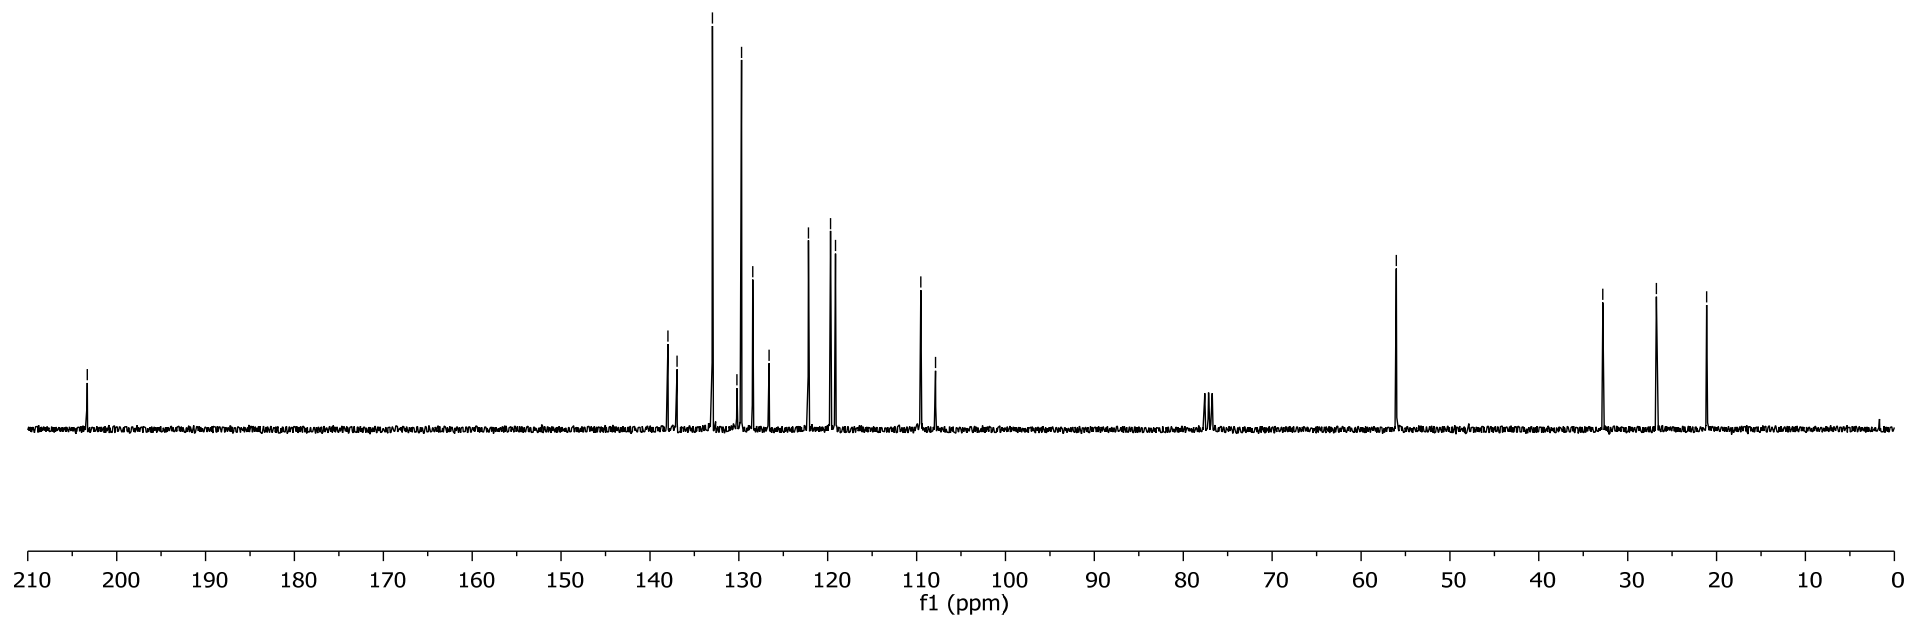

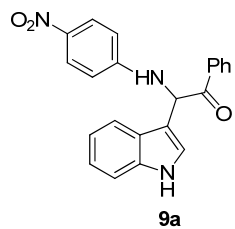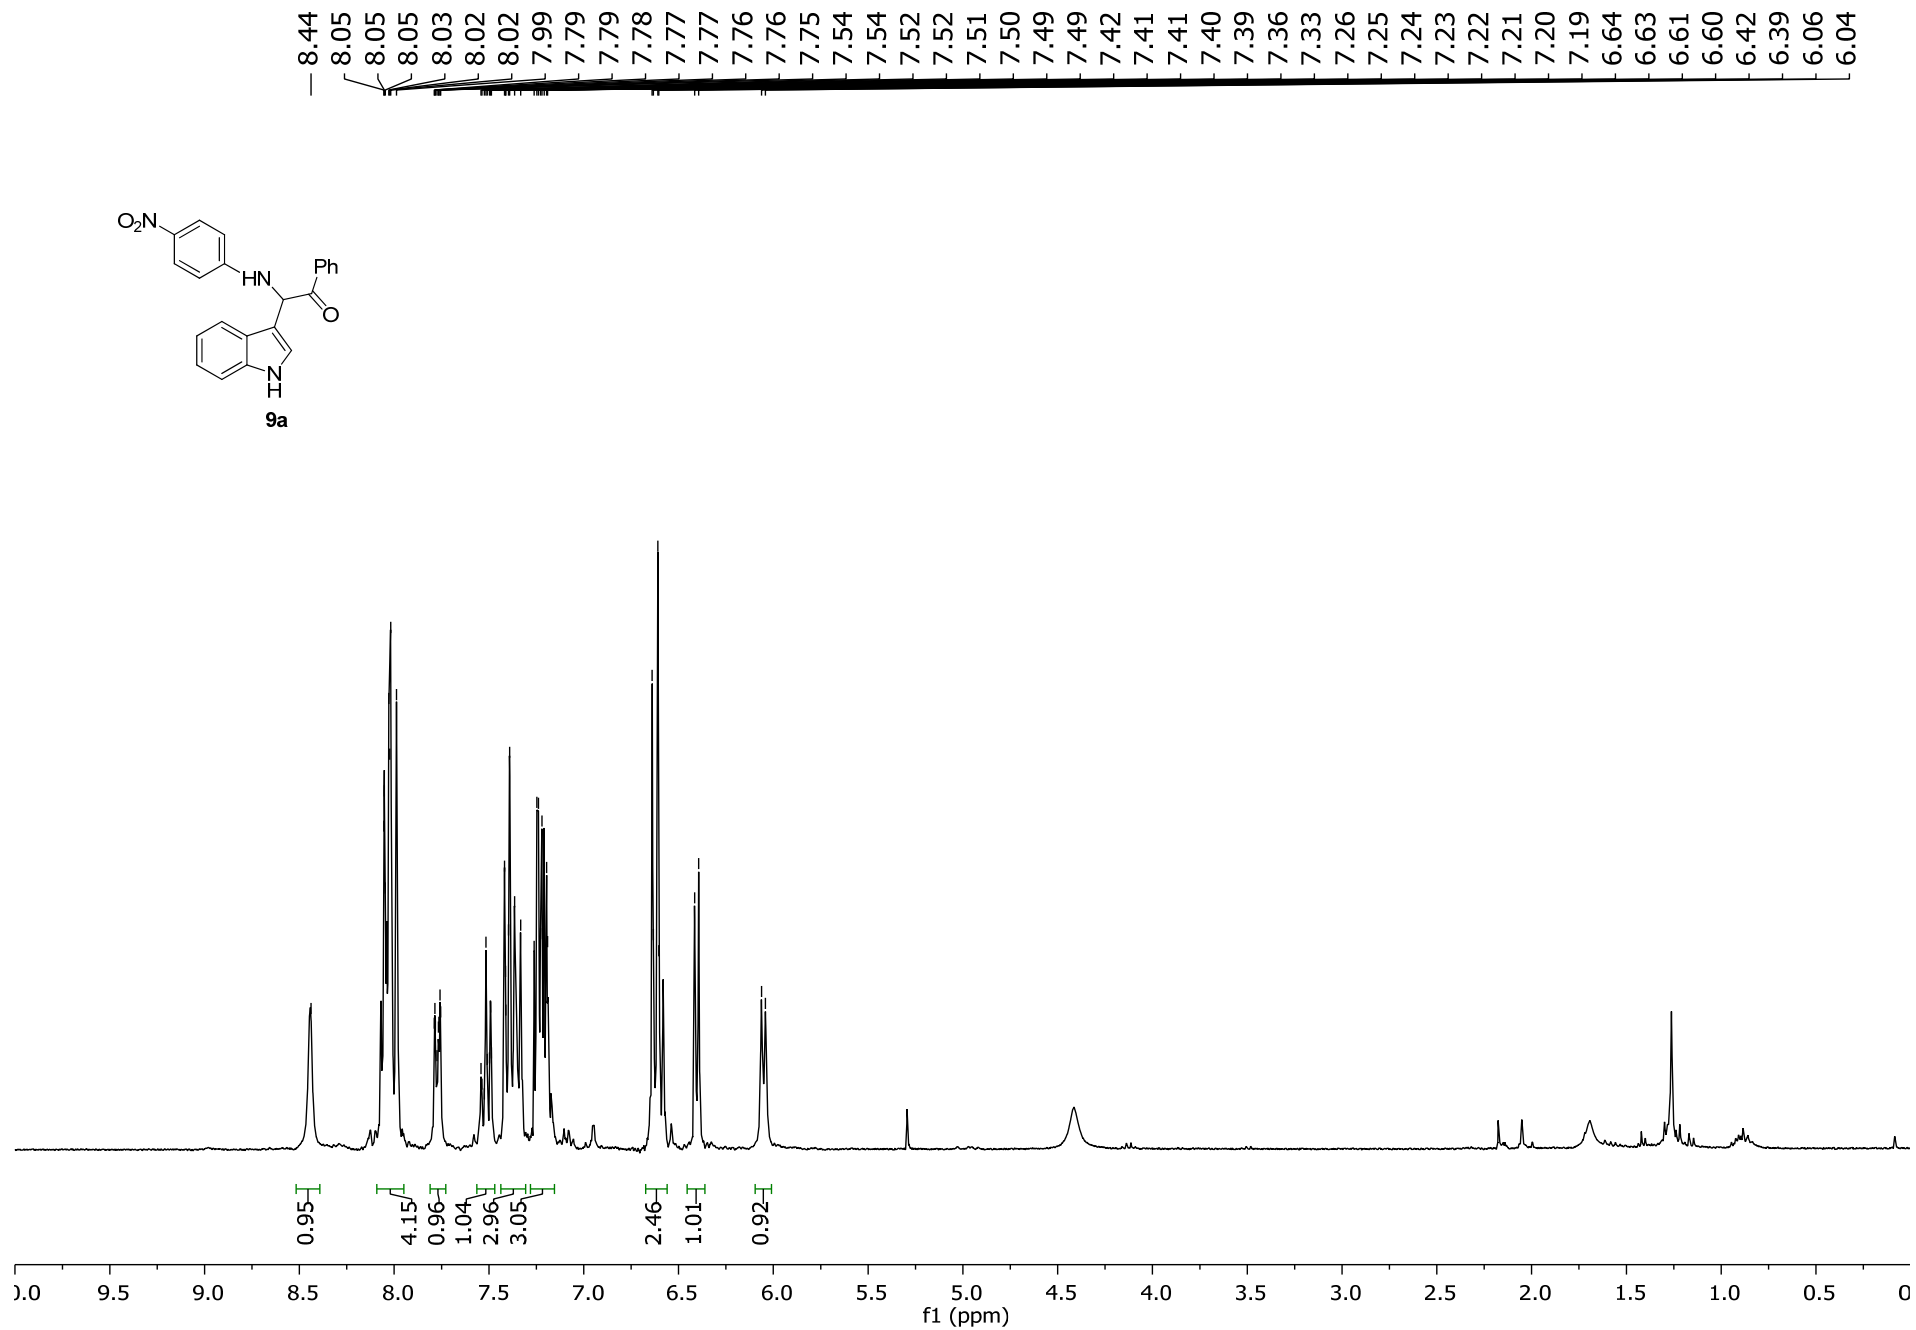

— 195.3

— 151.8  
— 138.4  
— 136.5  
— 134.5  
— 133.9  
— 128.9  
— 128.8  
— 126.5  
— 126.4  
— 125.4  
— 124.7  
— 123.1  
— 120.9  
— 118.8  
— 113.5  
— 112.0  
— 112.0  
— 111.0

— 55.1

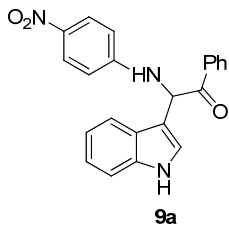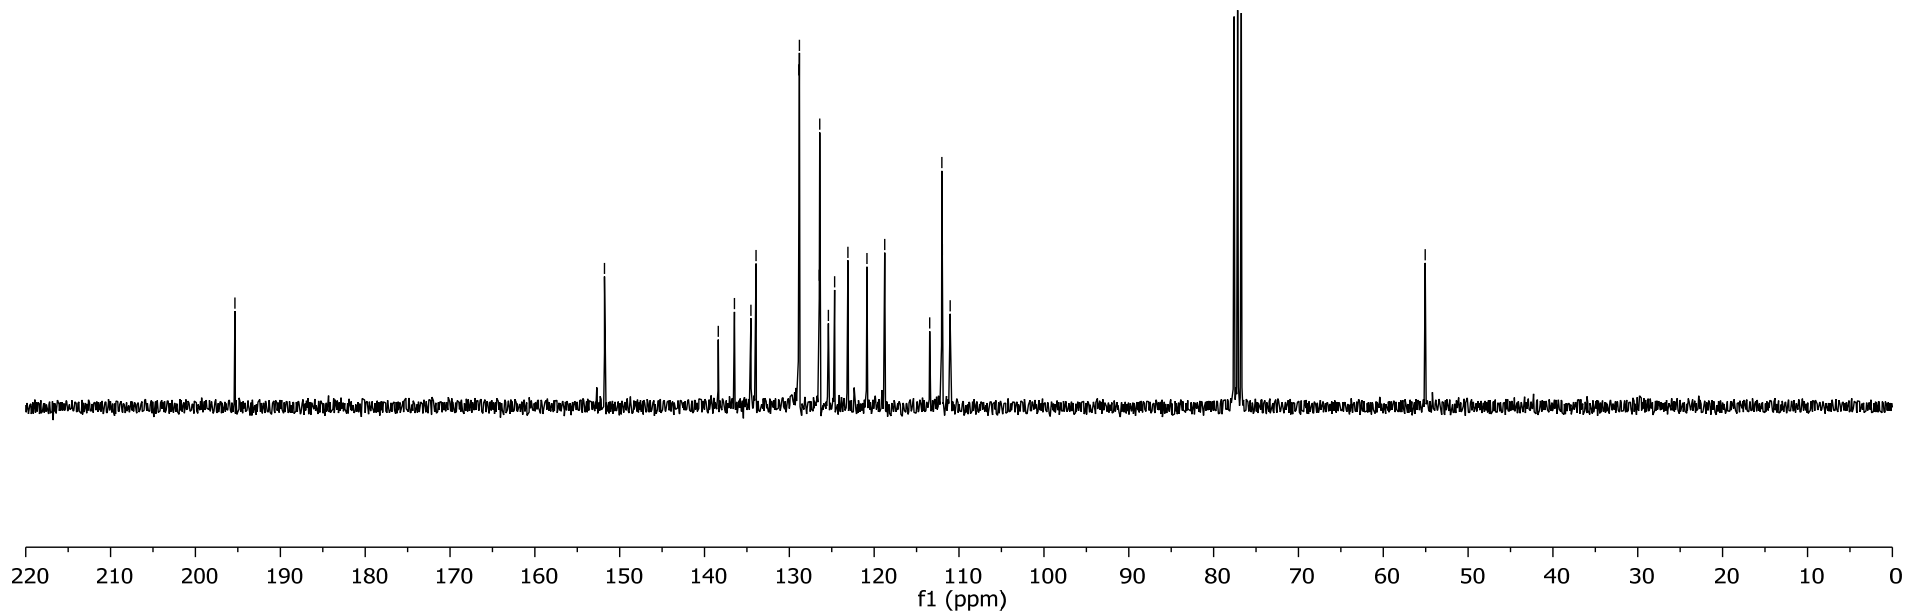

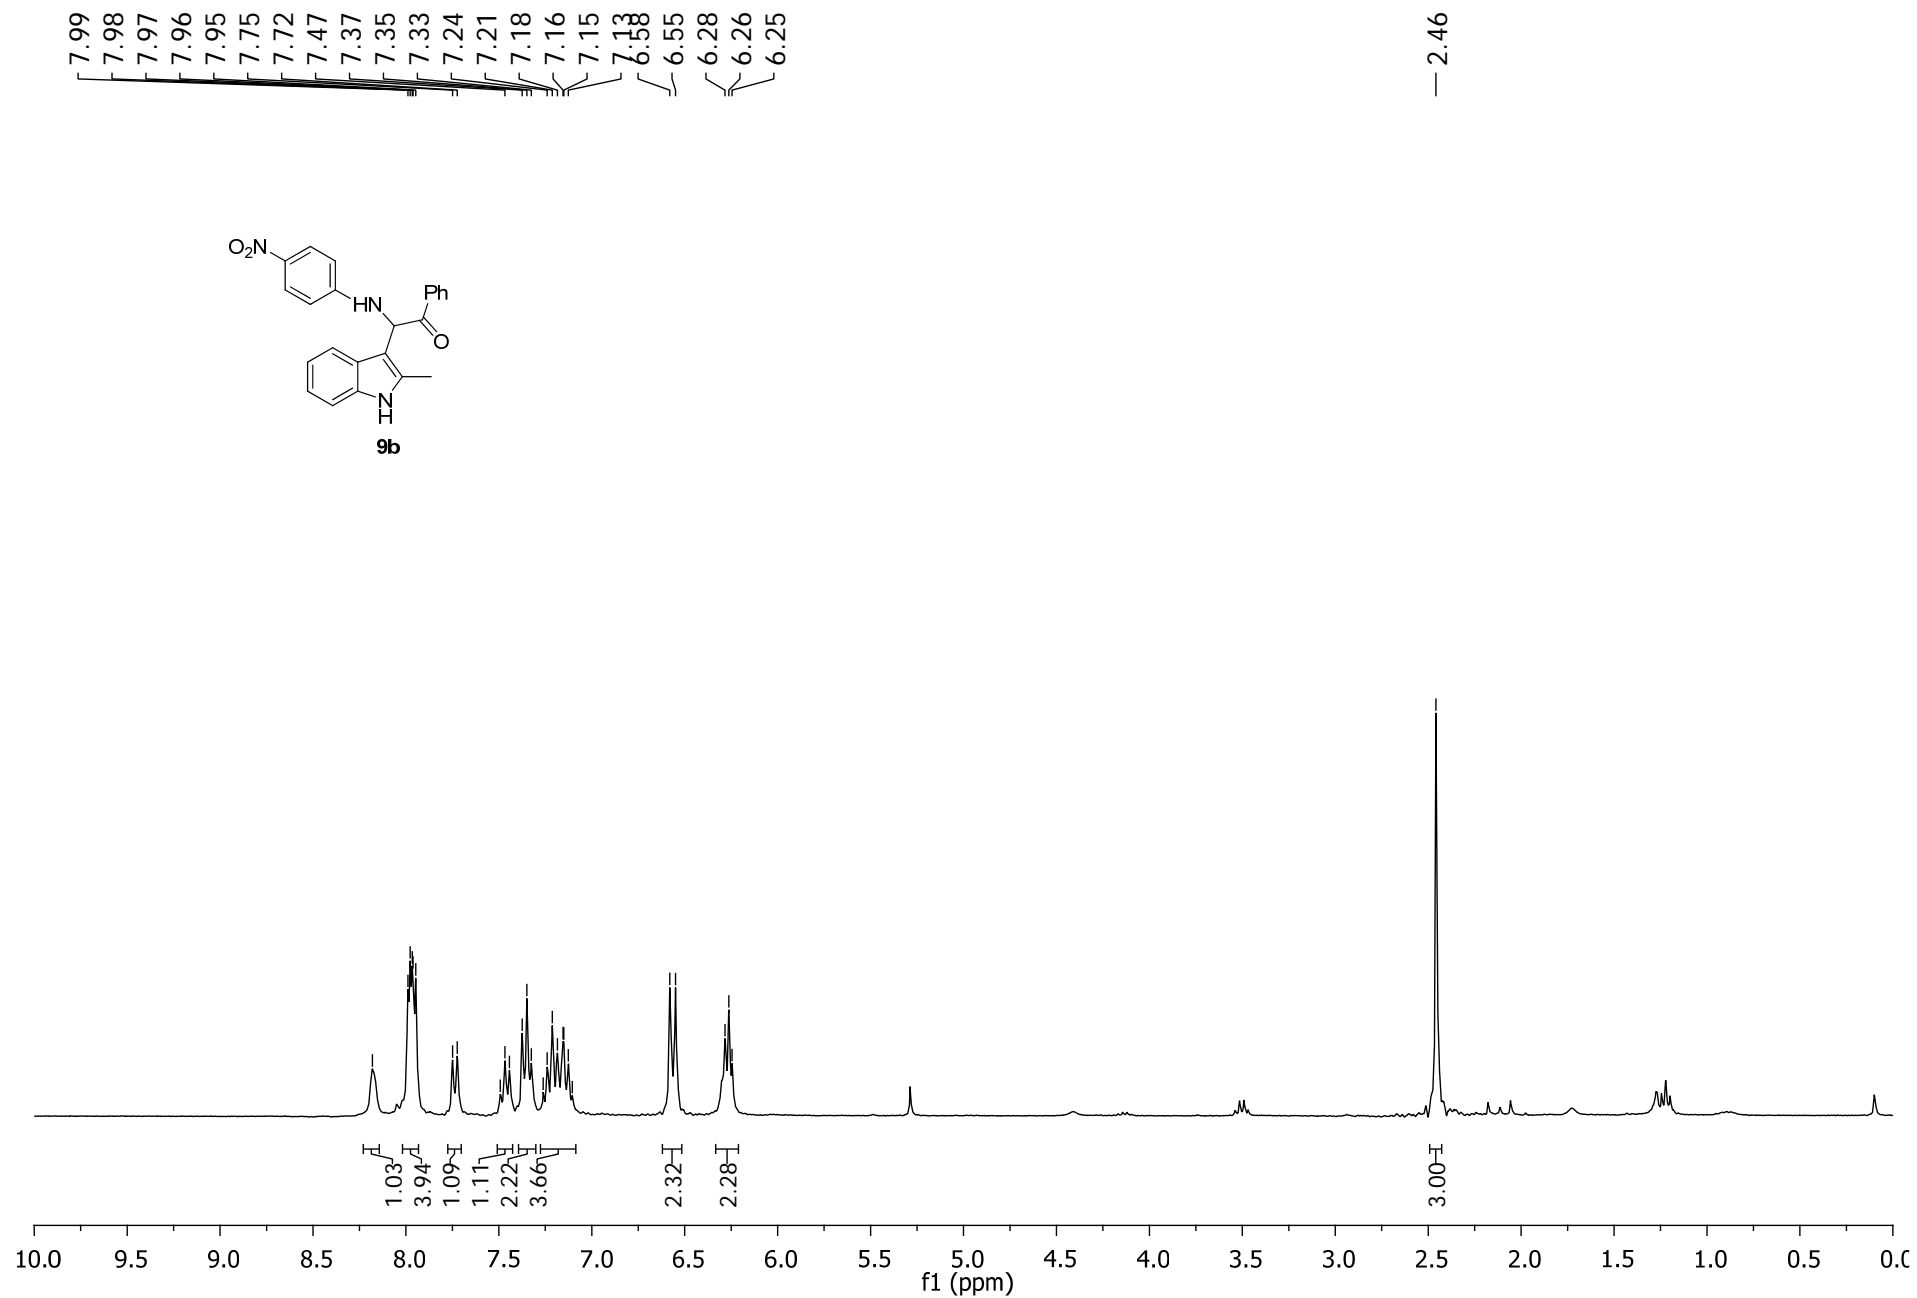

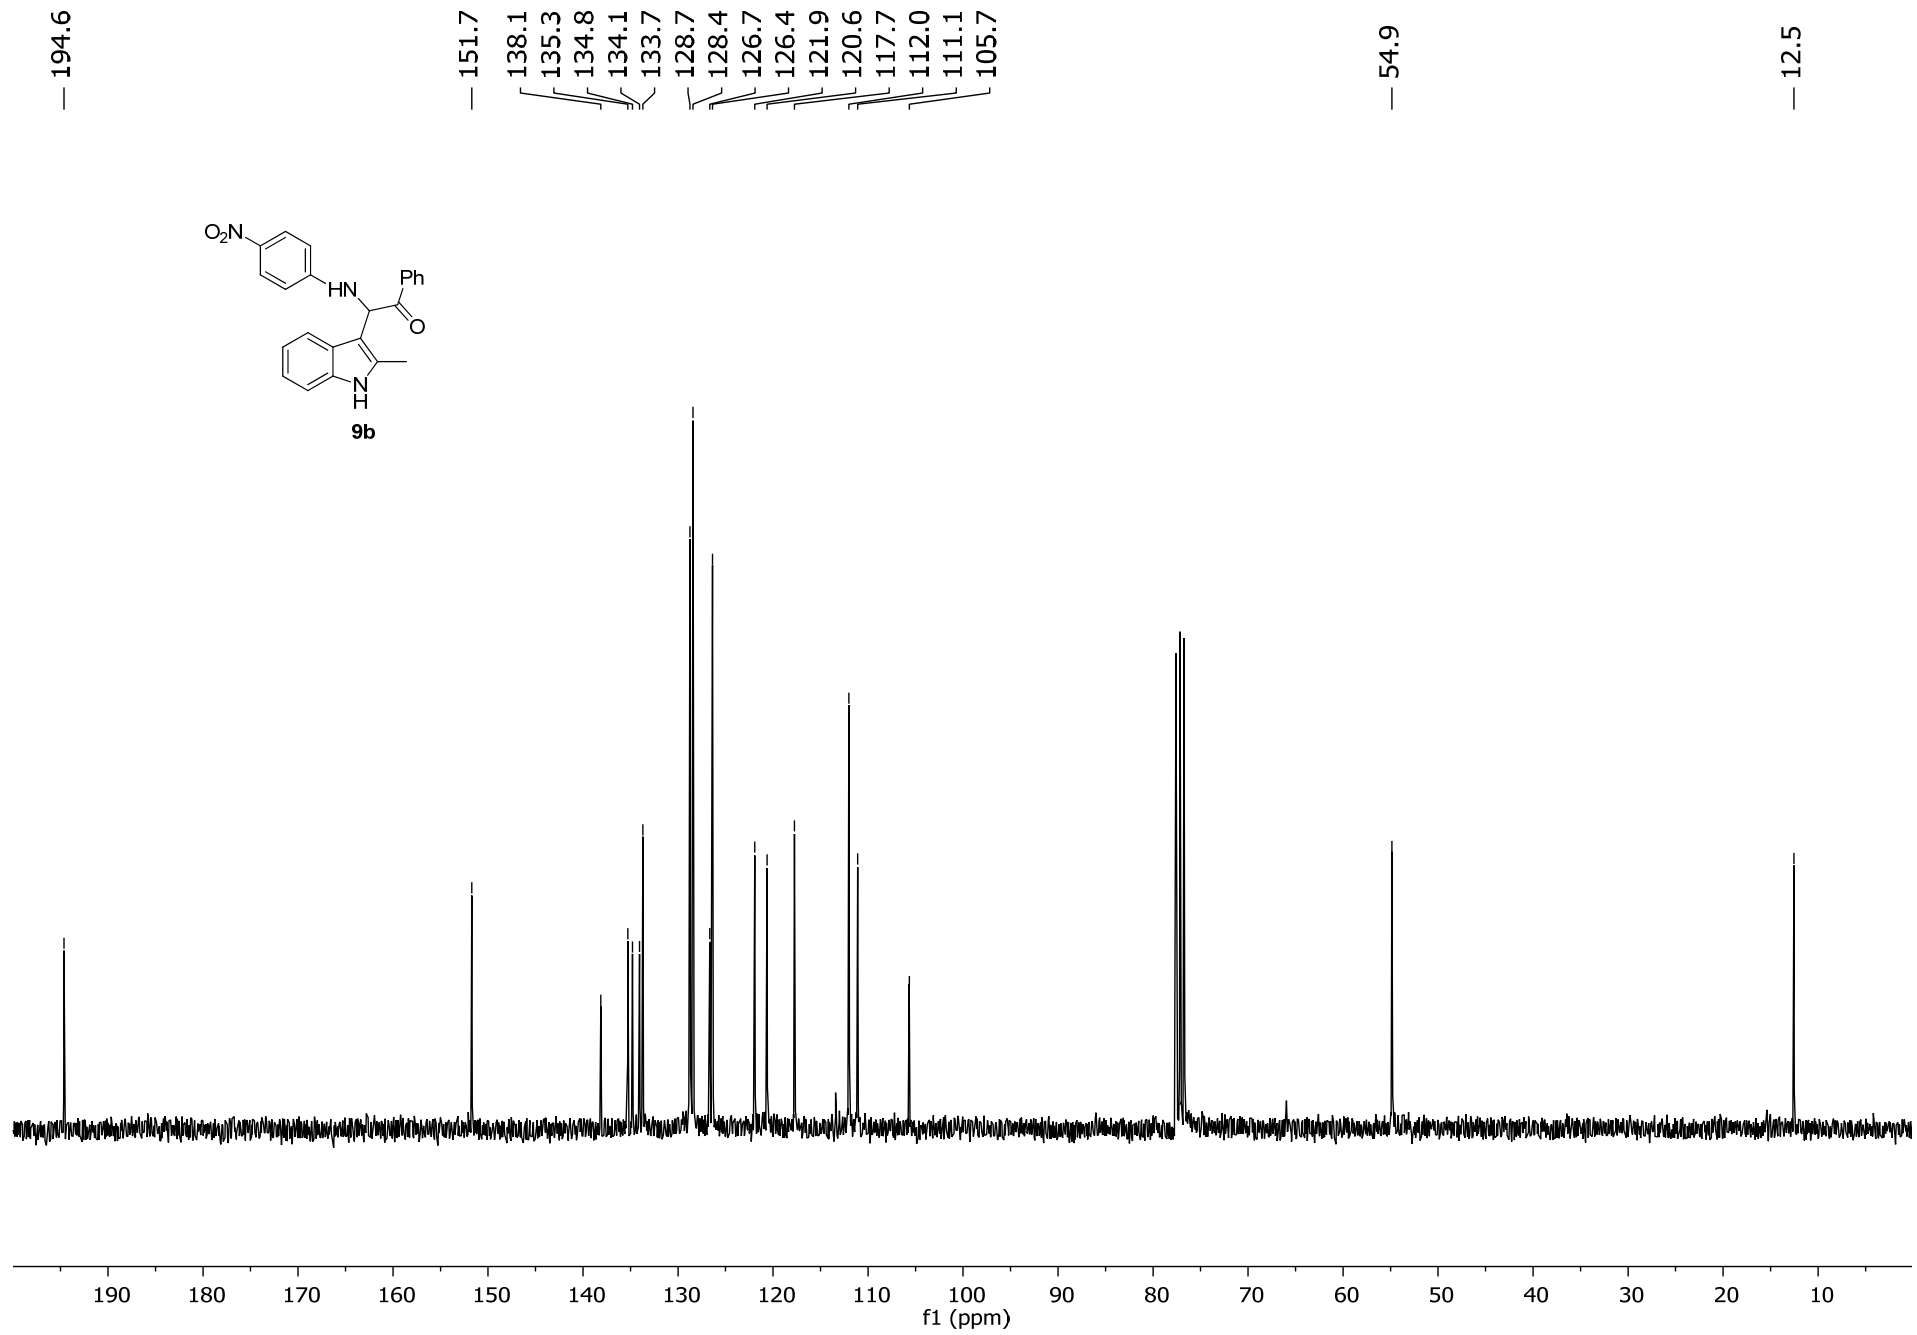

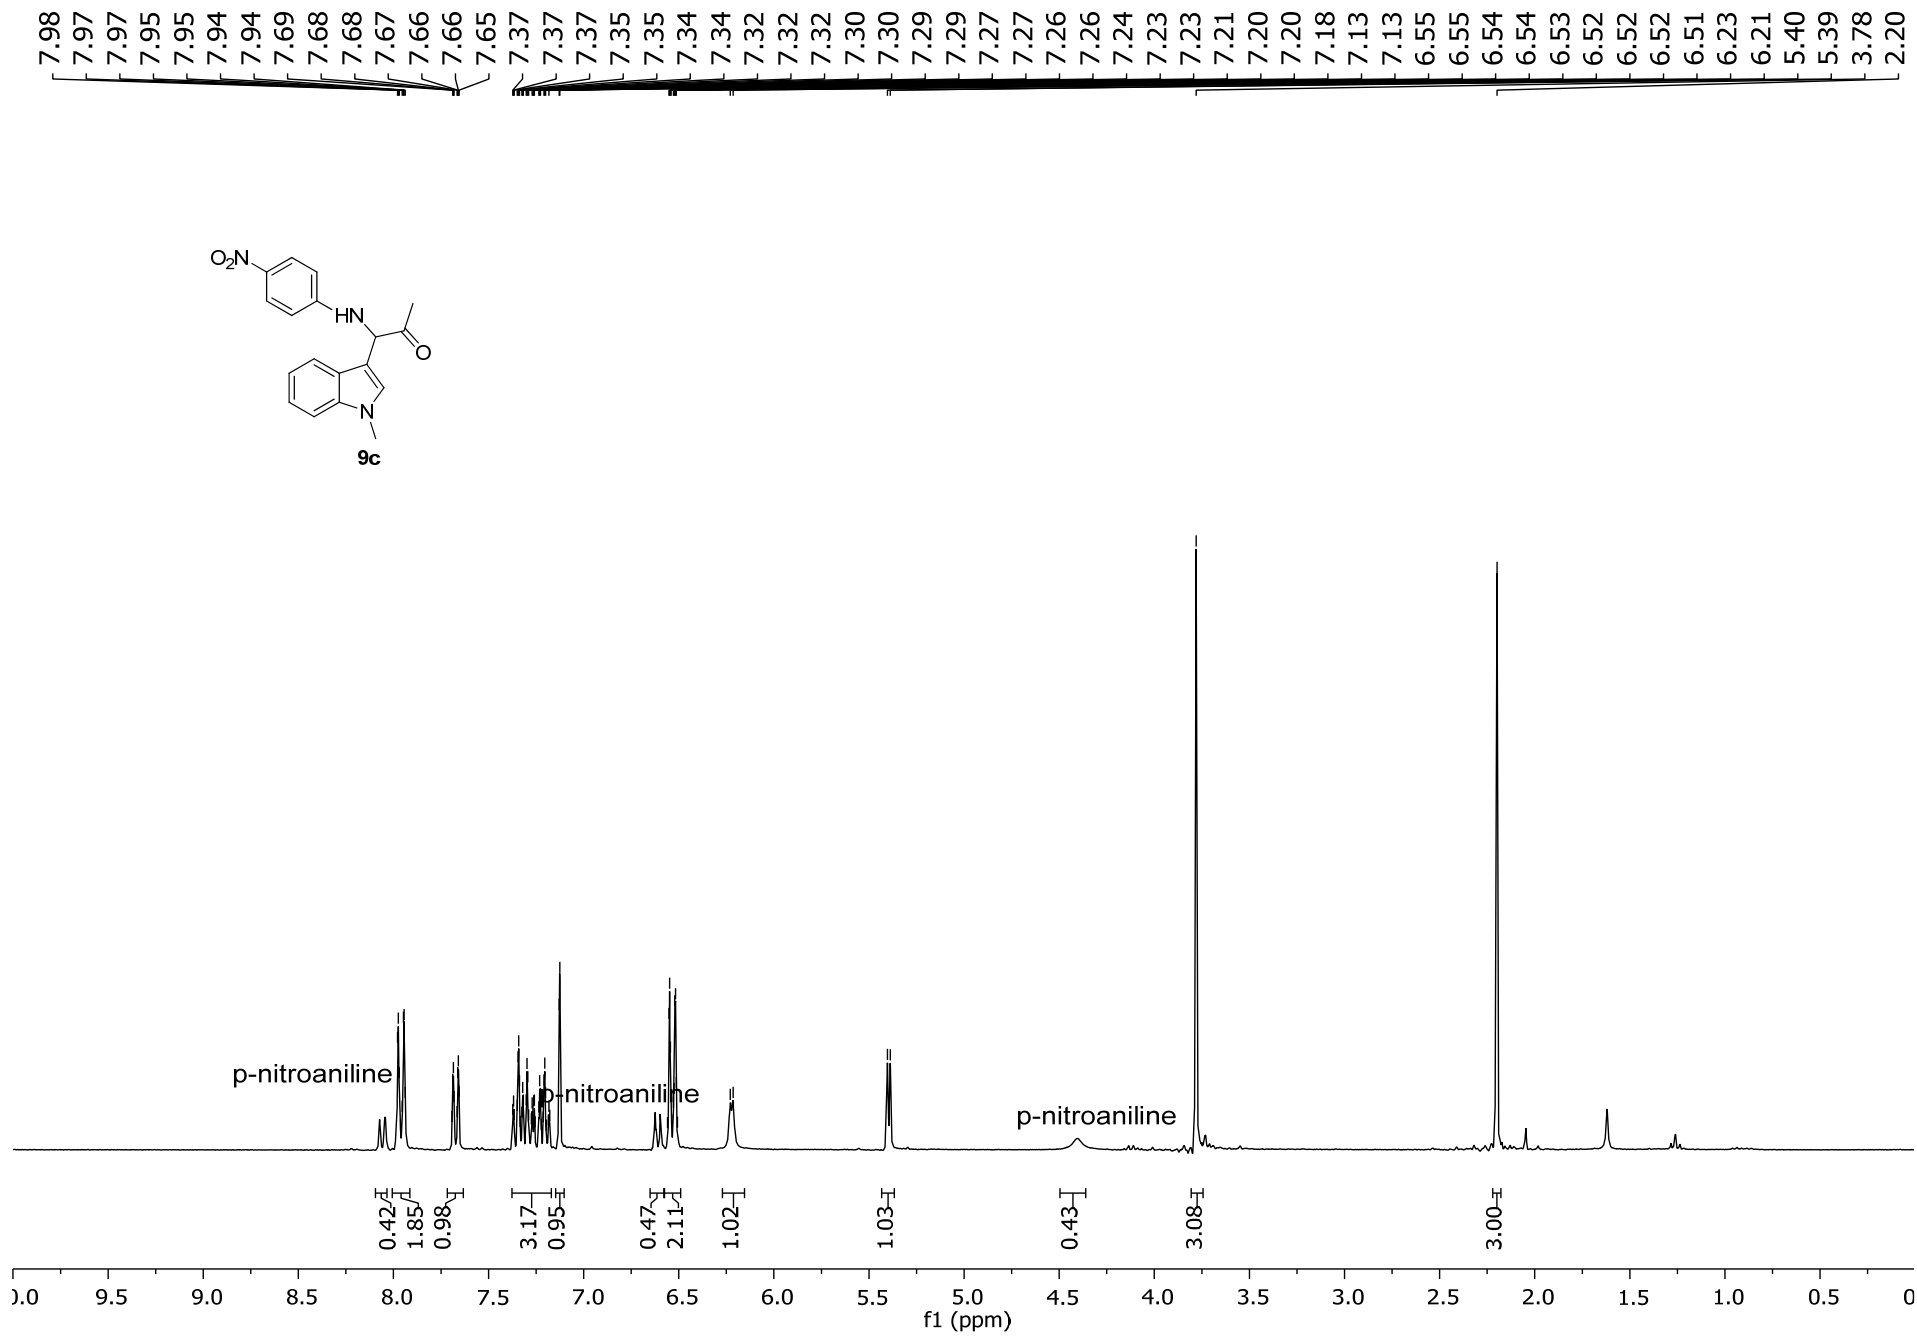



— 203.1

— 151.4

138.4  
137.5  
128.4  
126.3  
126.1  
122.7  
120.4  
118.7  
112.1  
110.2  
109.0

— 59.5

— 33.2

— 26.7

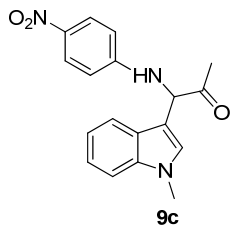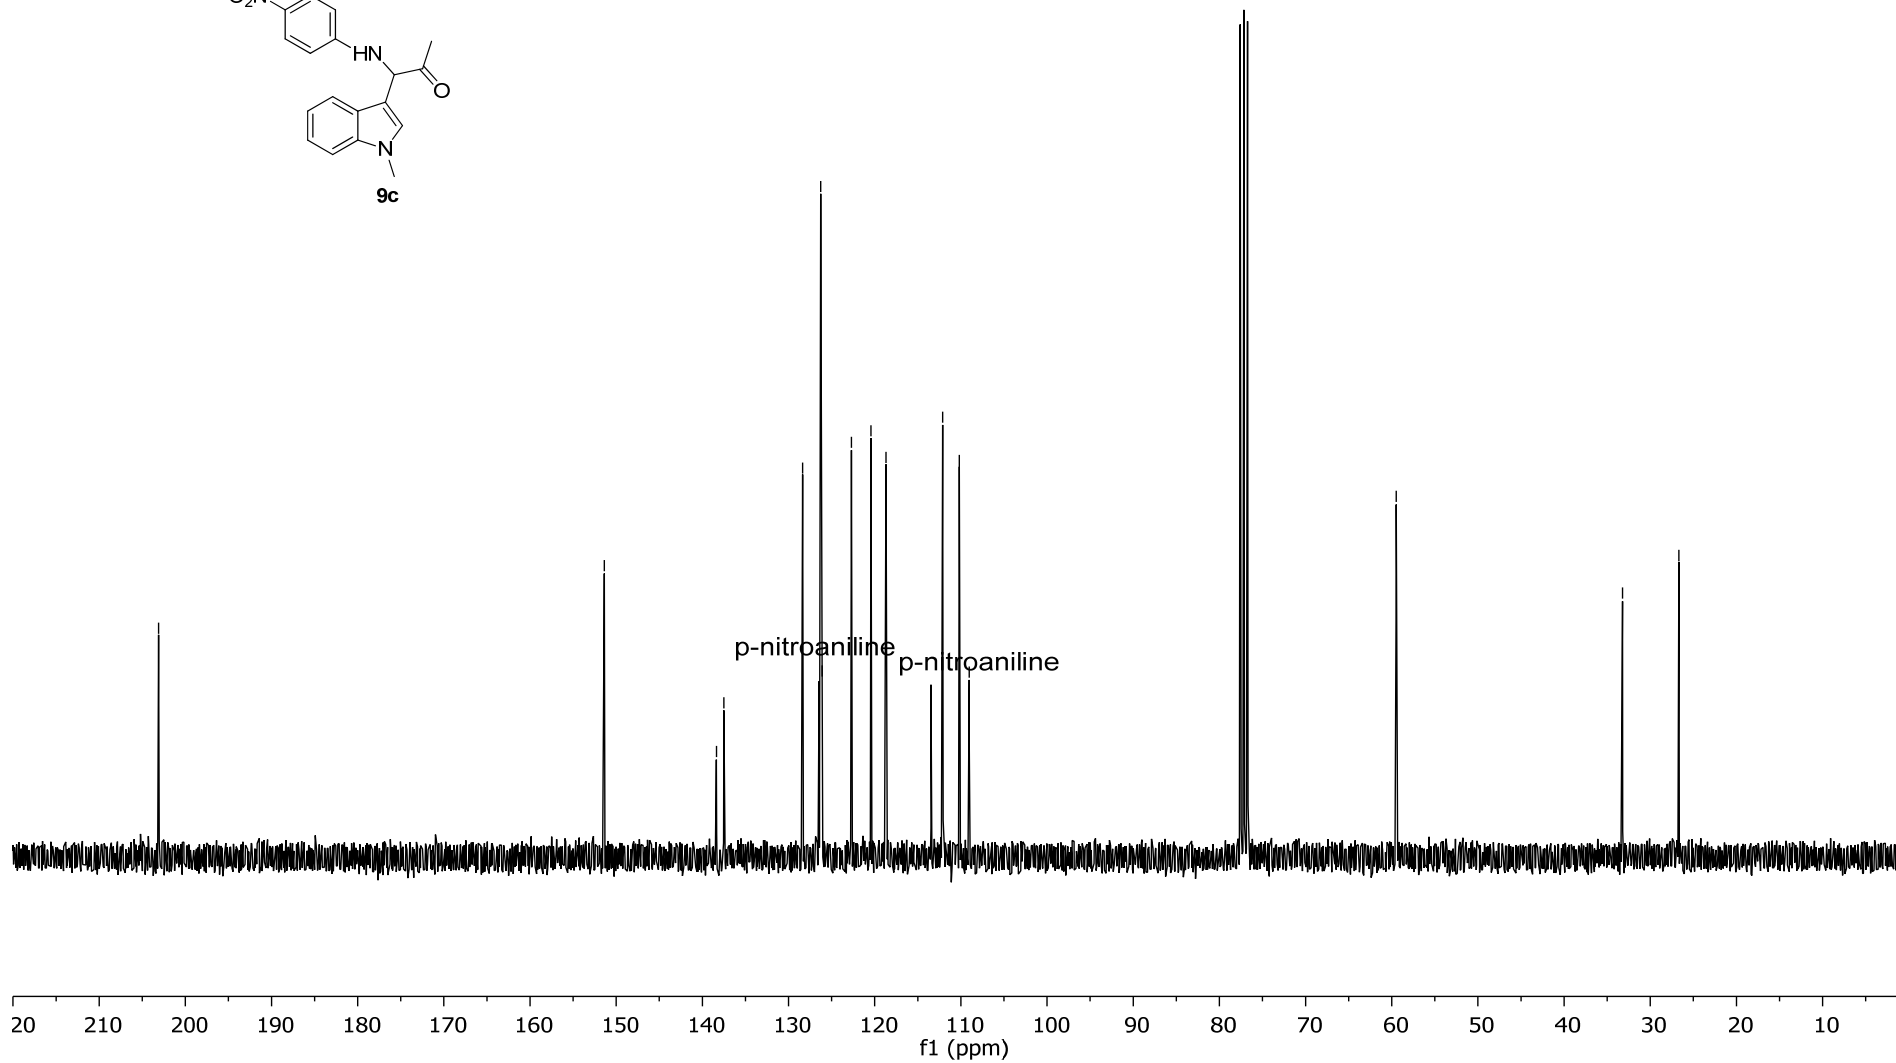

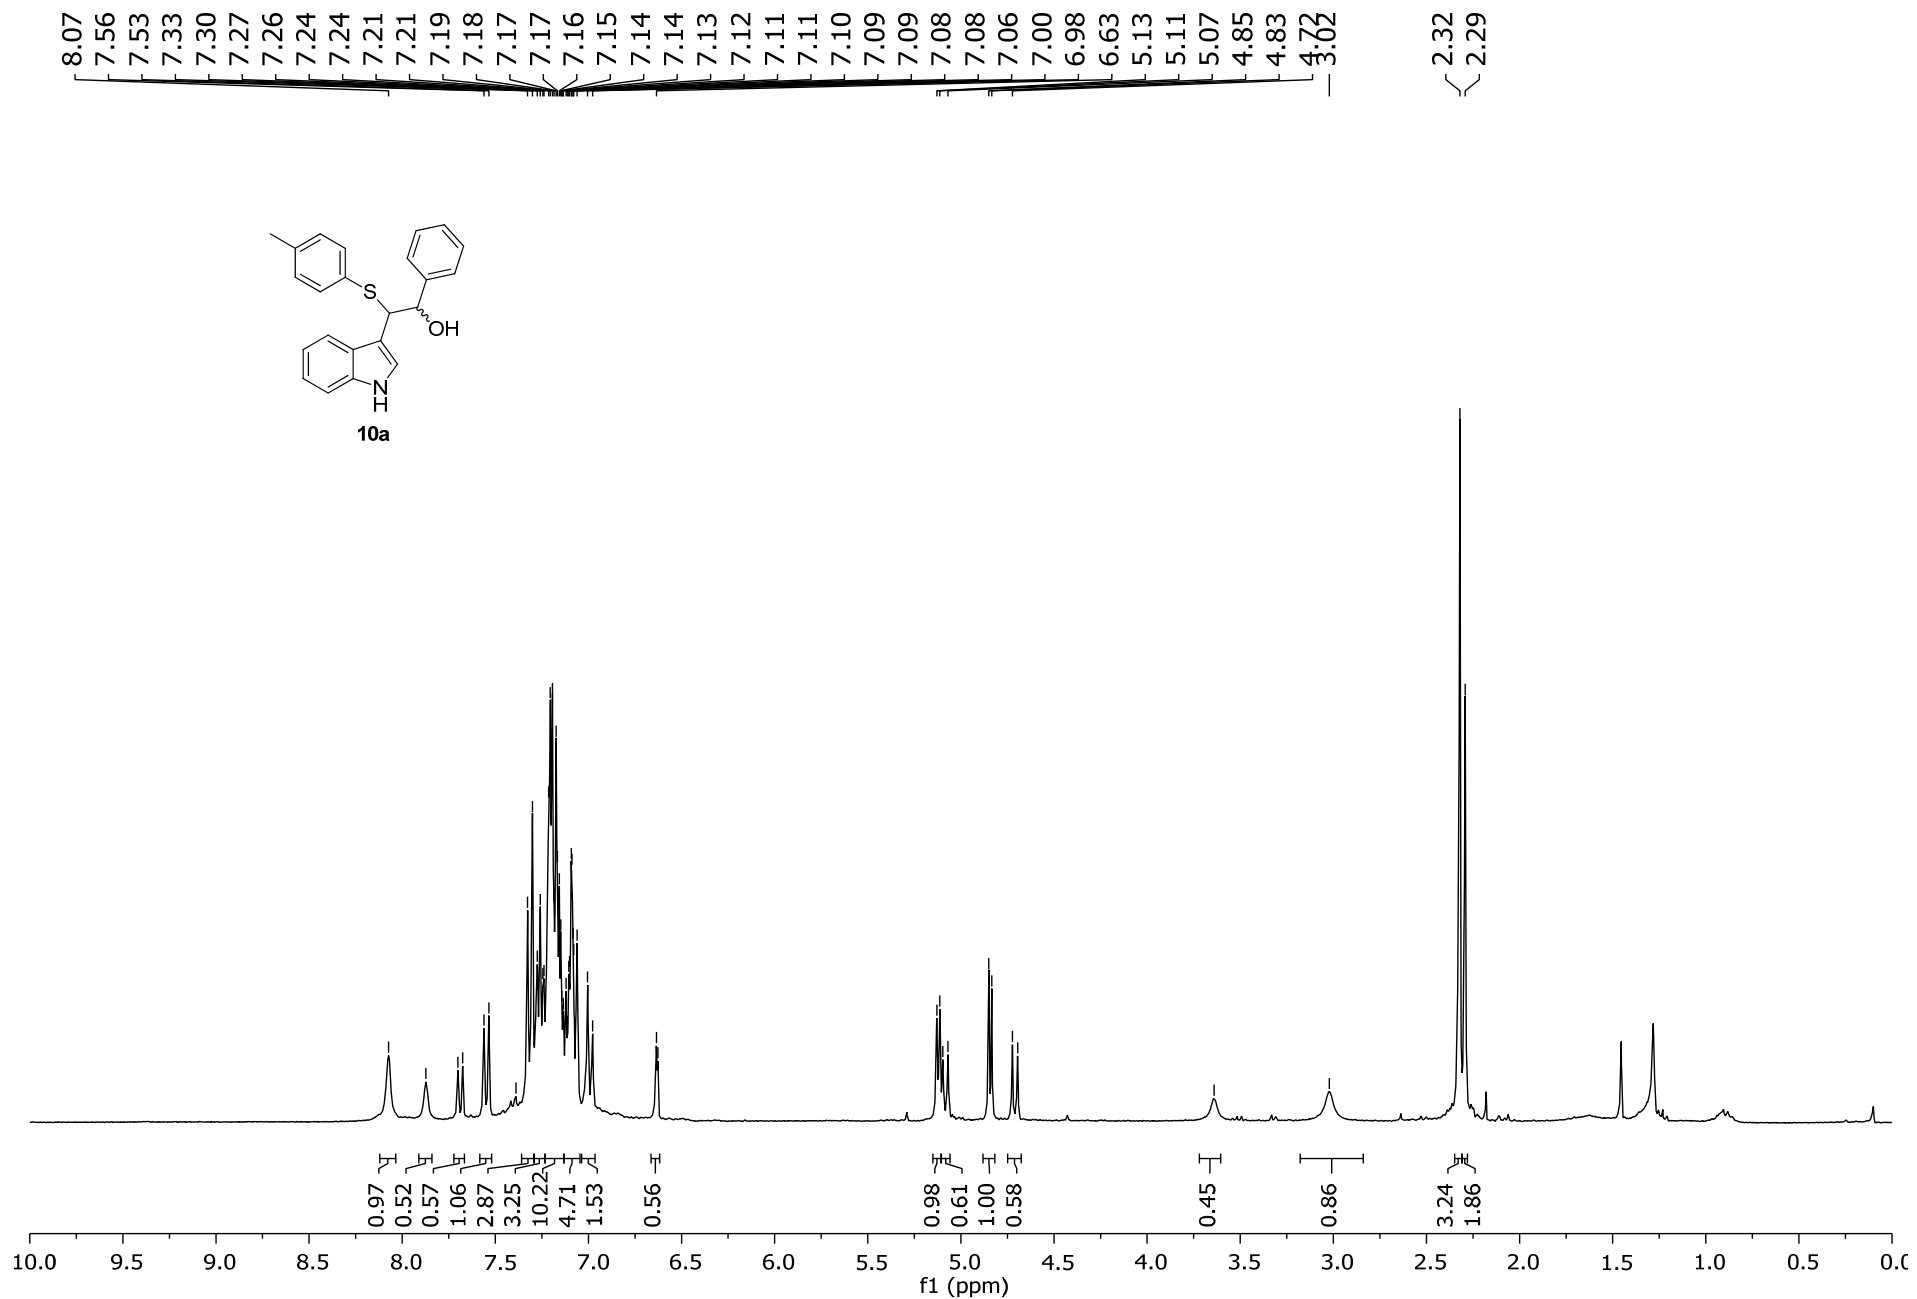

141.2  
140.9  
137.8  
137.8  
136.1  
136.0  
133.7  
133.1  
131.2  
129.9  
129.6  
128.1  
128.0  
127.7  
127.6  
127.0  
126.9  
126.6  
126.3  
124.5  
123.5  
122.3  
119.8  
119.8  
119.6  
119.3  
113.6  
111.4  
111.3  
111.3  
75.1  
74.4  
56.4  
54.2  
21.3  
21.2

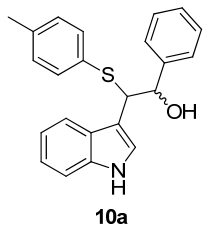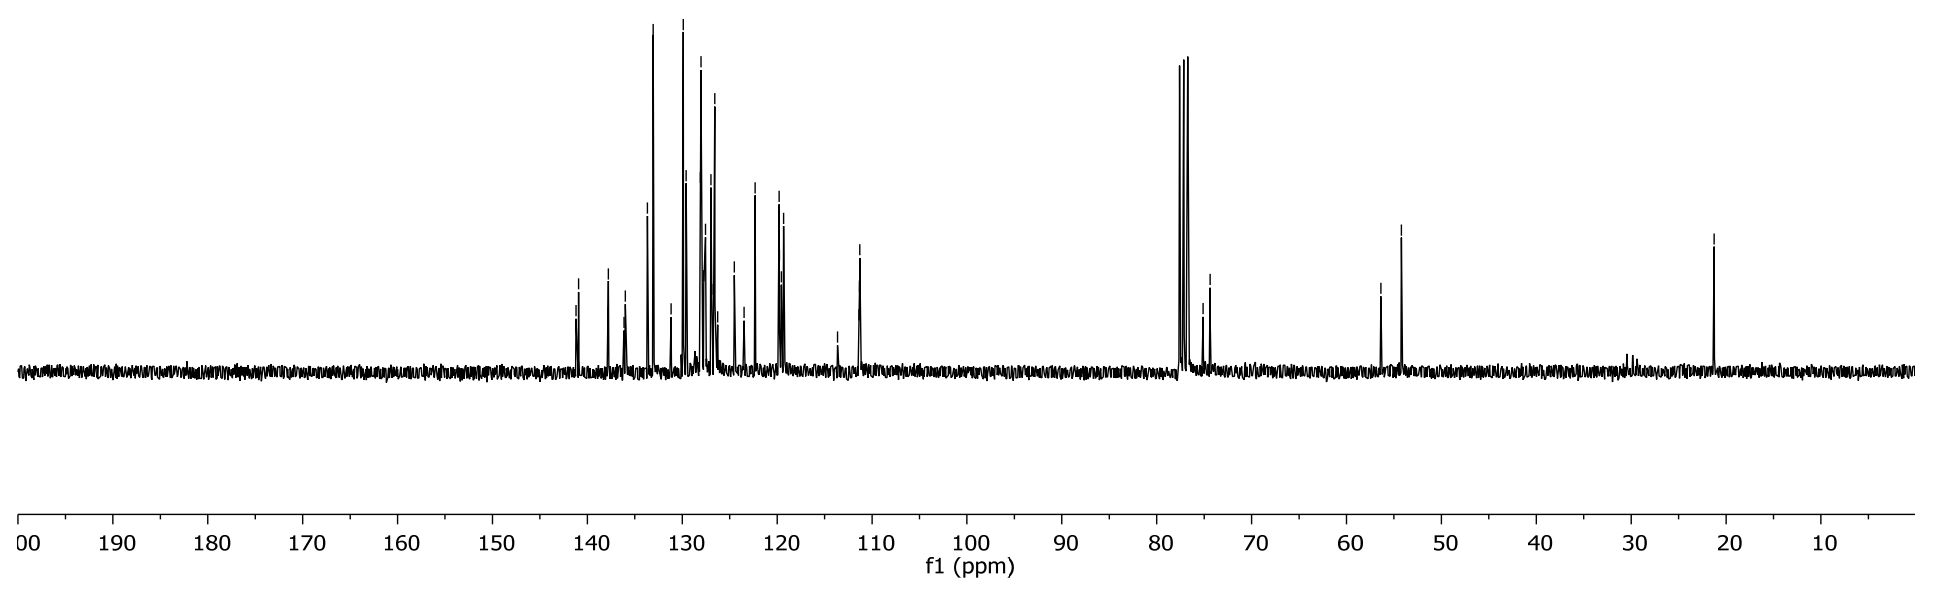

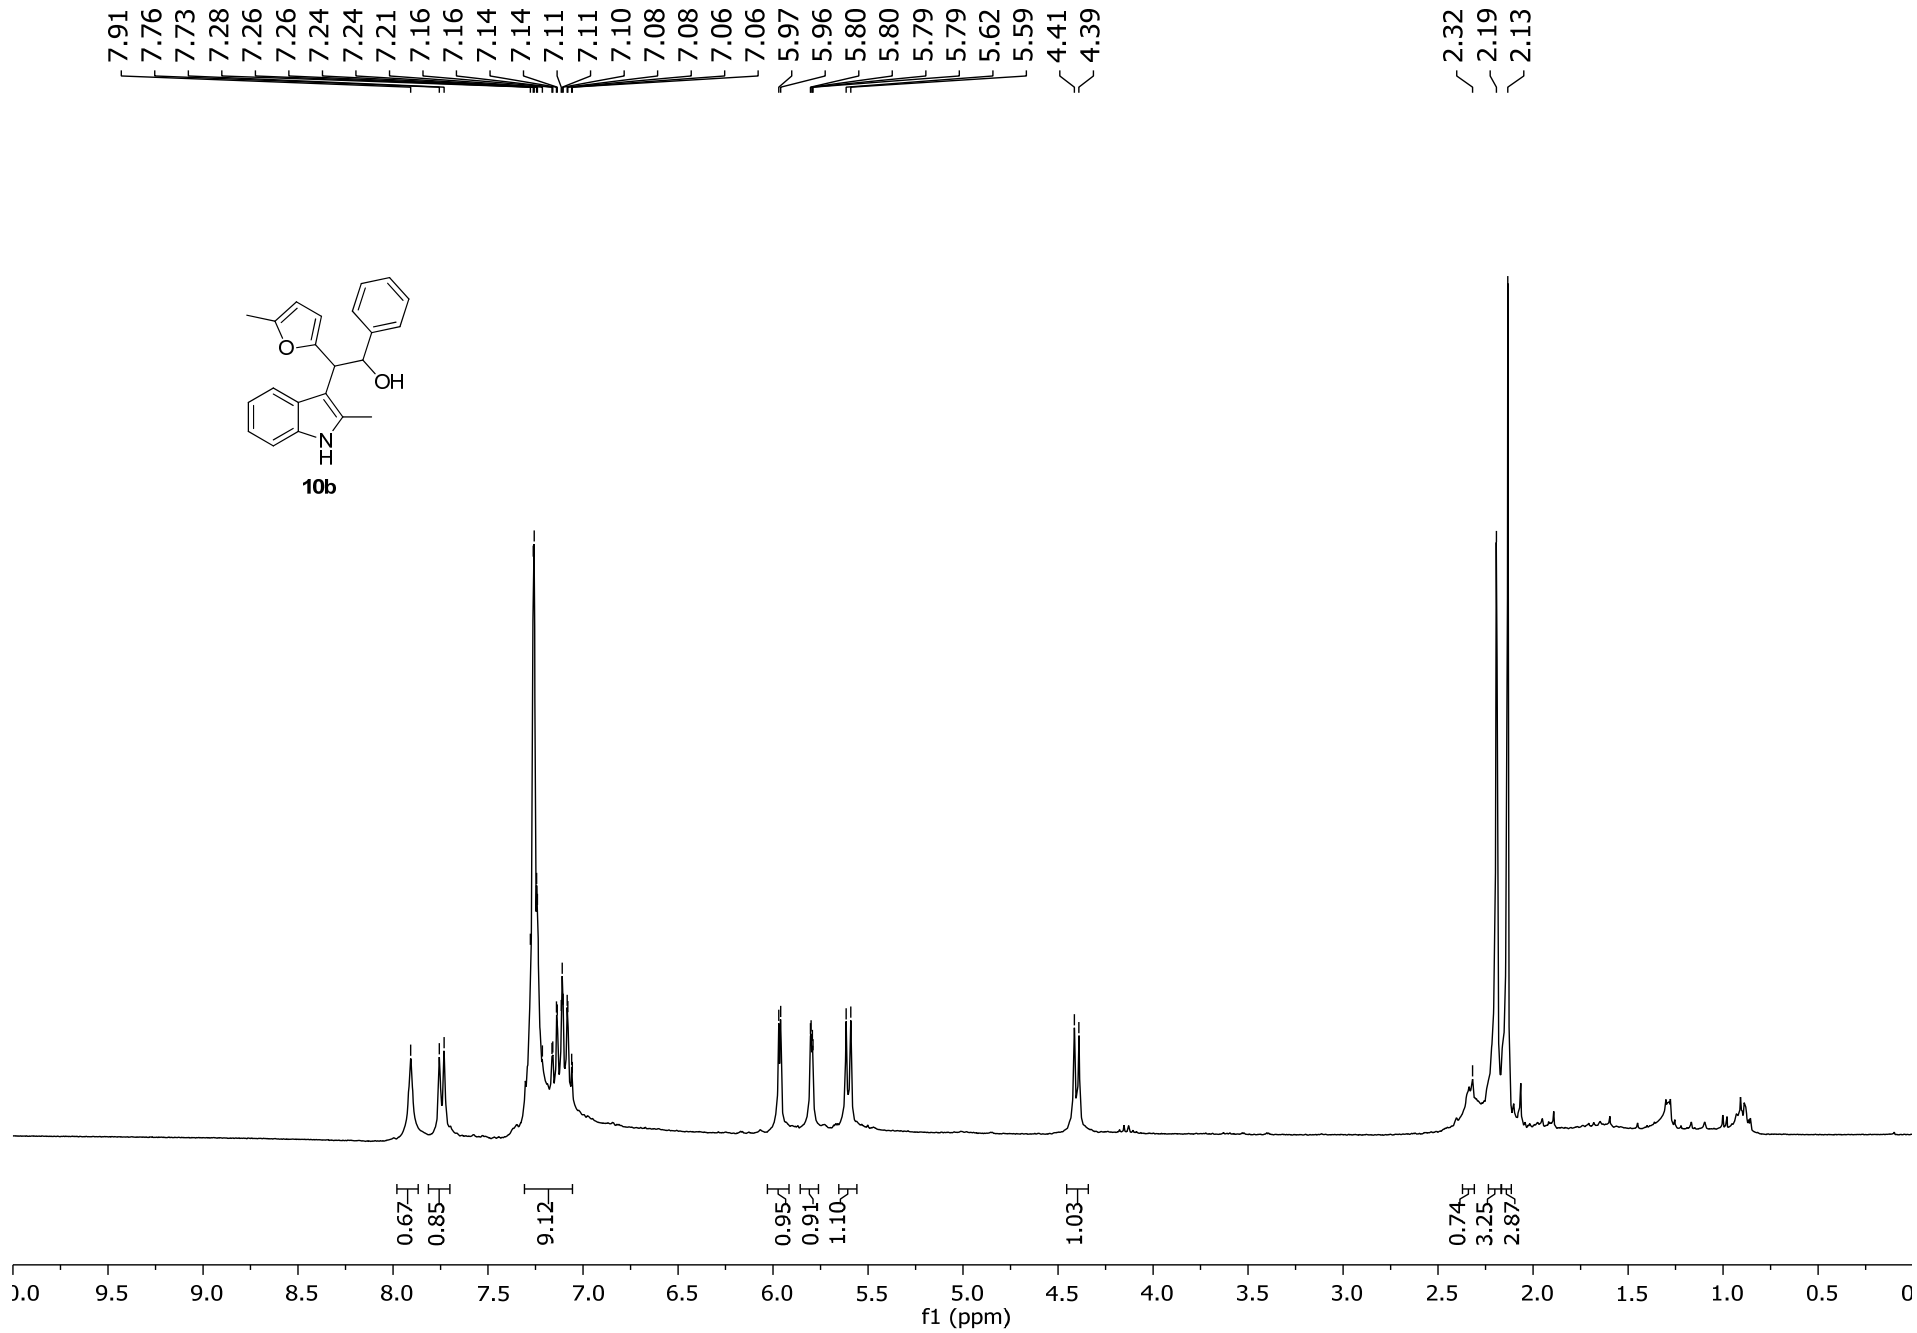

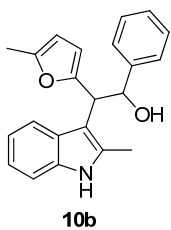

152.8  
150.5  
142.9  
135.5  
134.0  
128.1  
127.9  
127.5  
126.6  
121.3  
120.1  
119.6  
110.5  
107.8  
107.3  
106.0  
75.2  
46.3  
13.7  
11.9

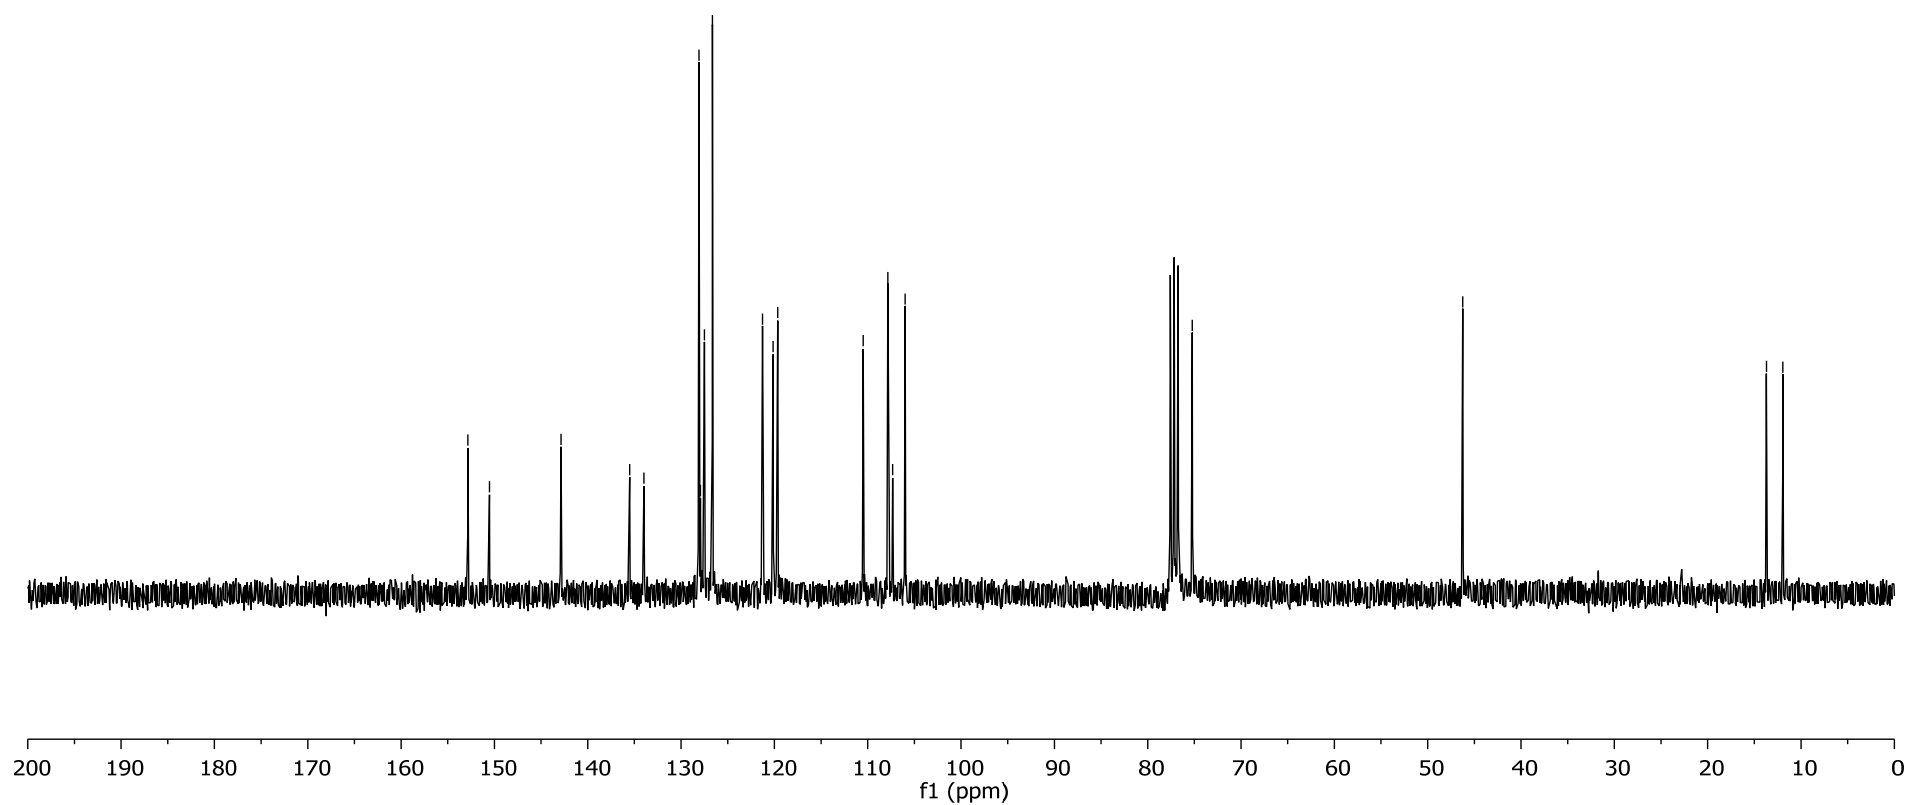

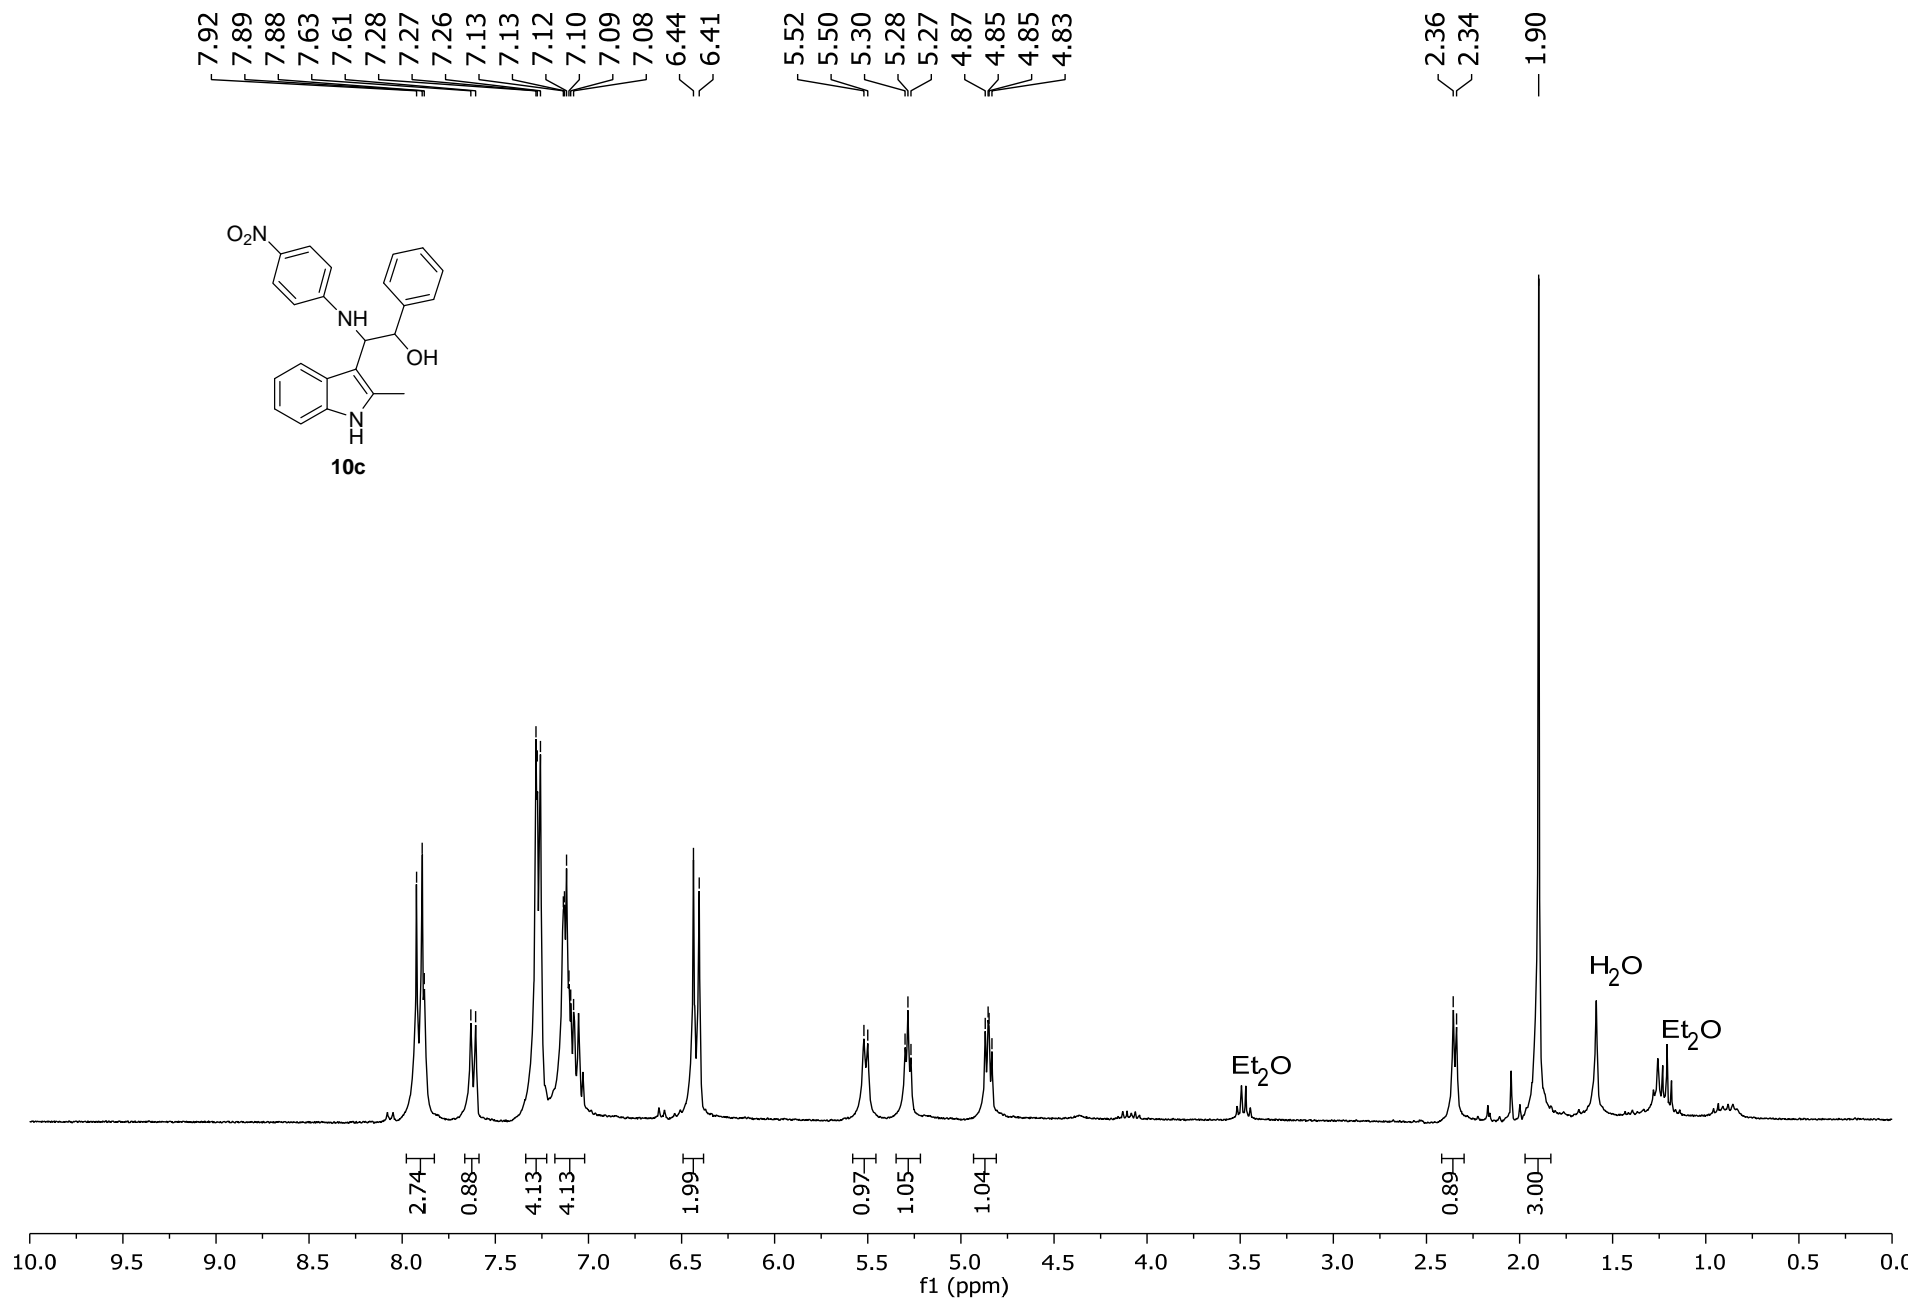

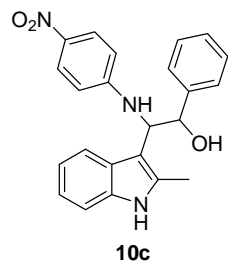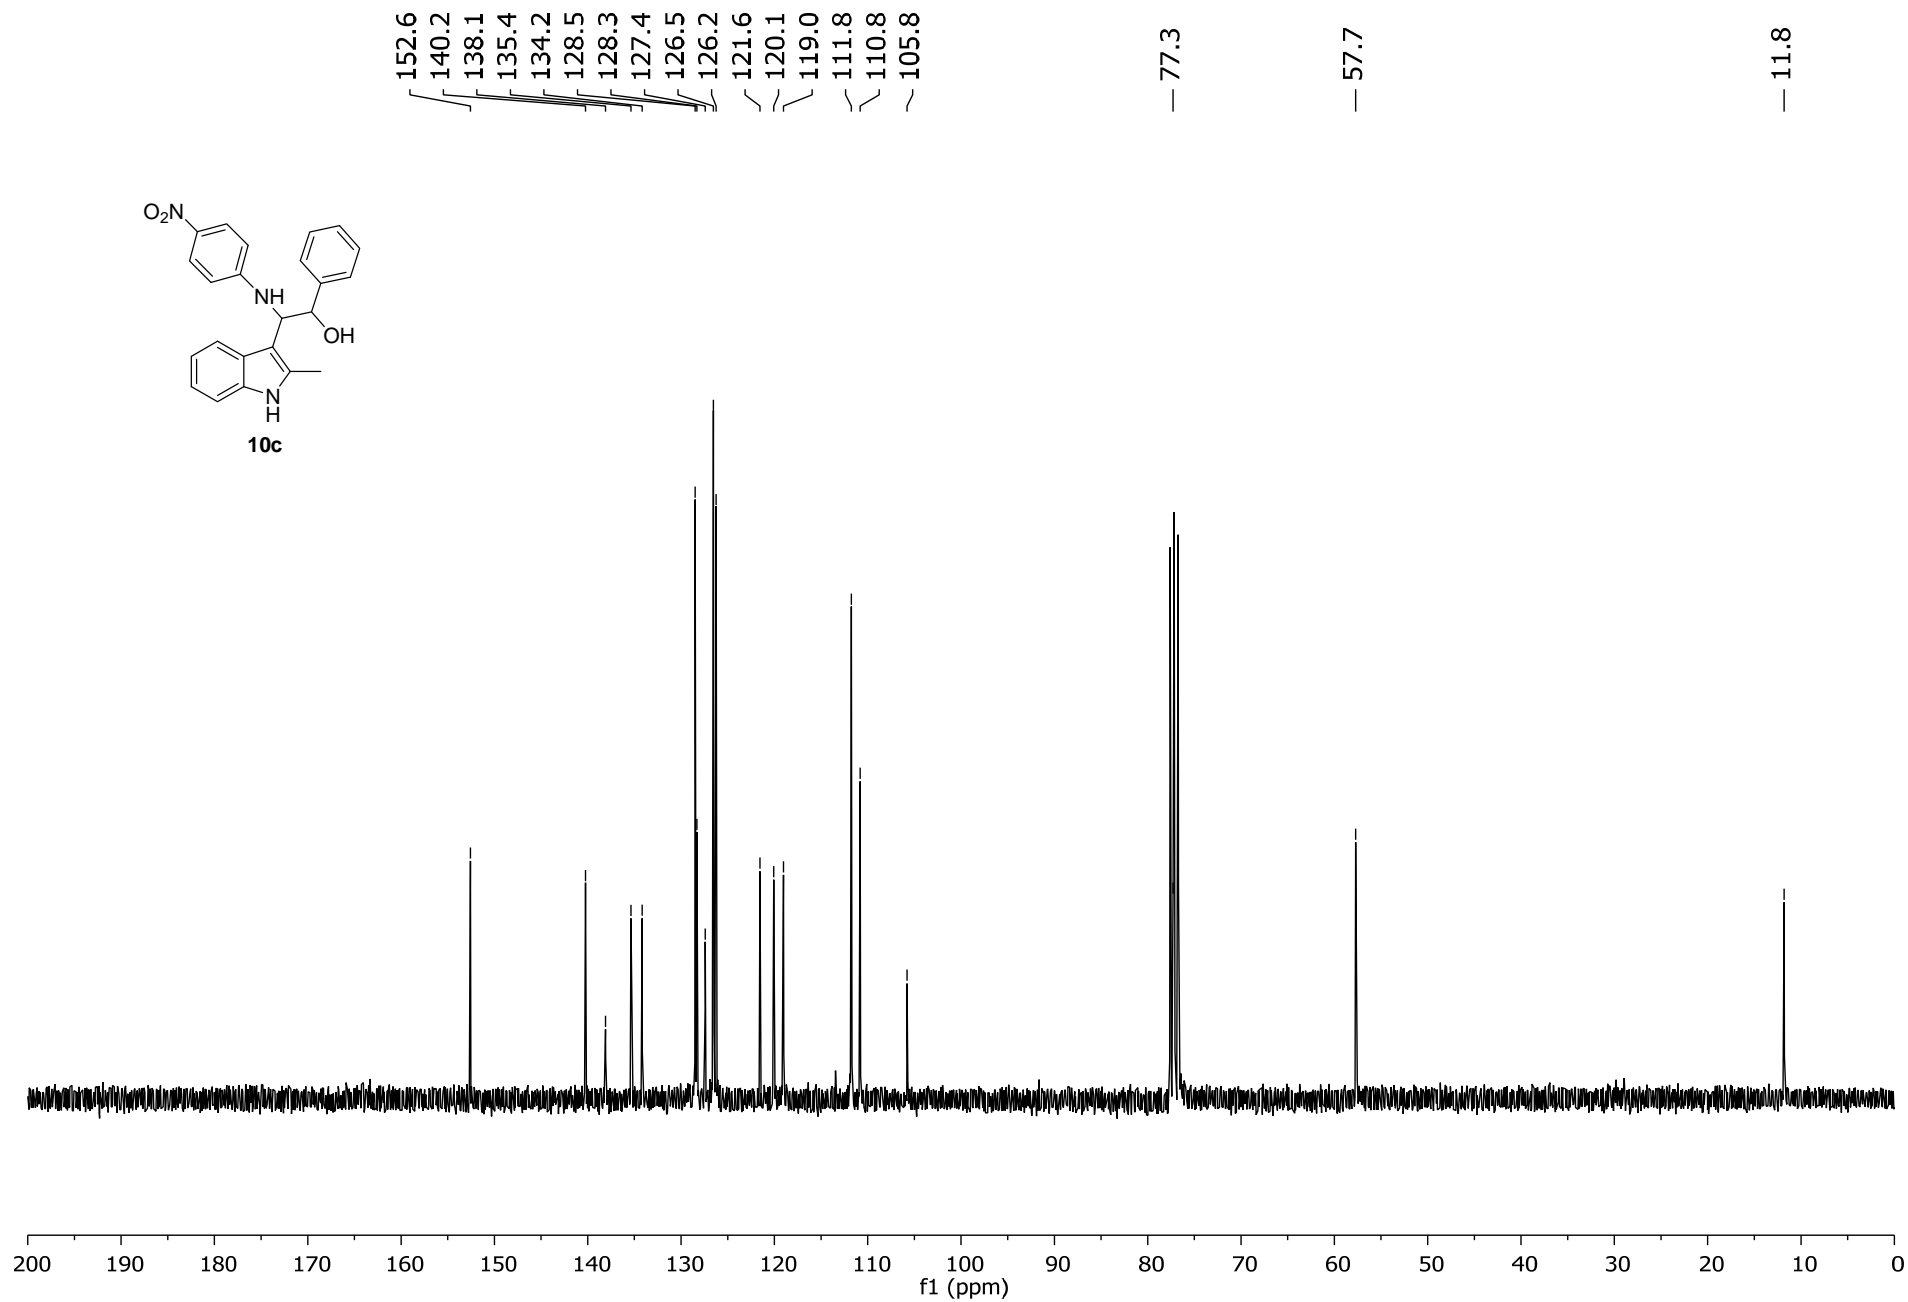

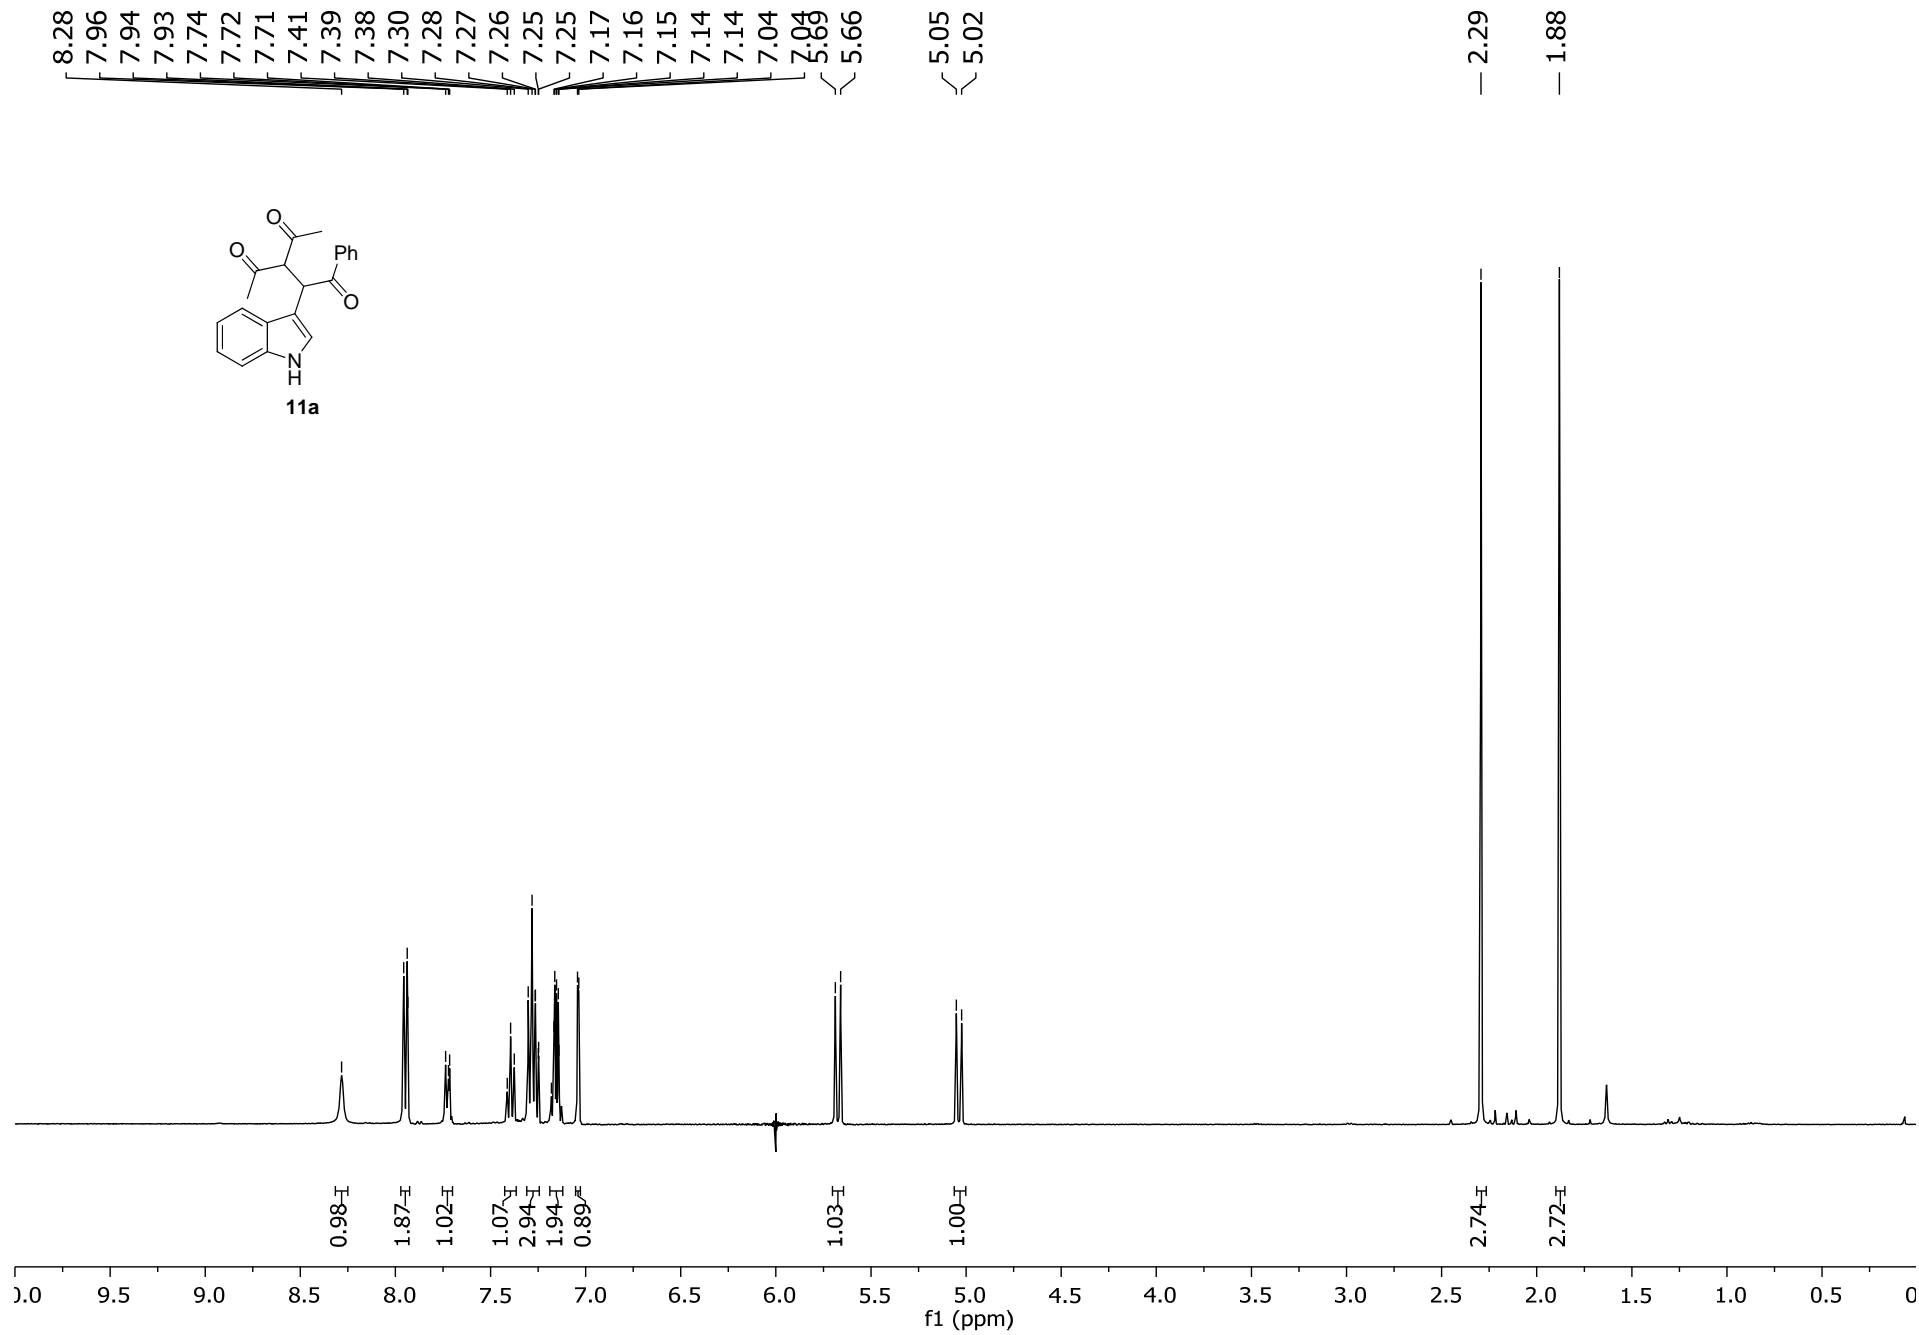



204.0  
202.3  
197.8

136.5  
135.9  
133.1  
128.8  
128.5  
125.8  
124.2  
122.7  
120.5  
119.0  
111.7  
109.3

70.3

45.5

31.6  
30.4

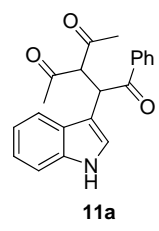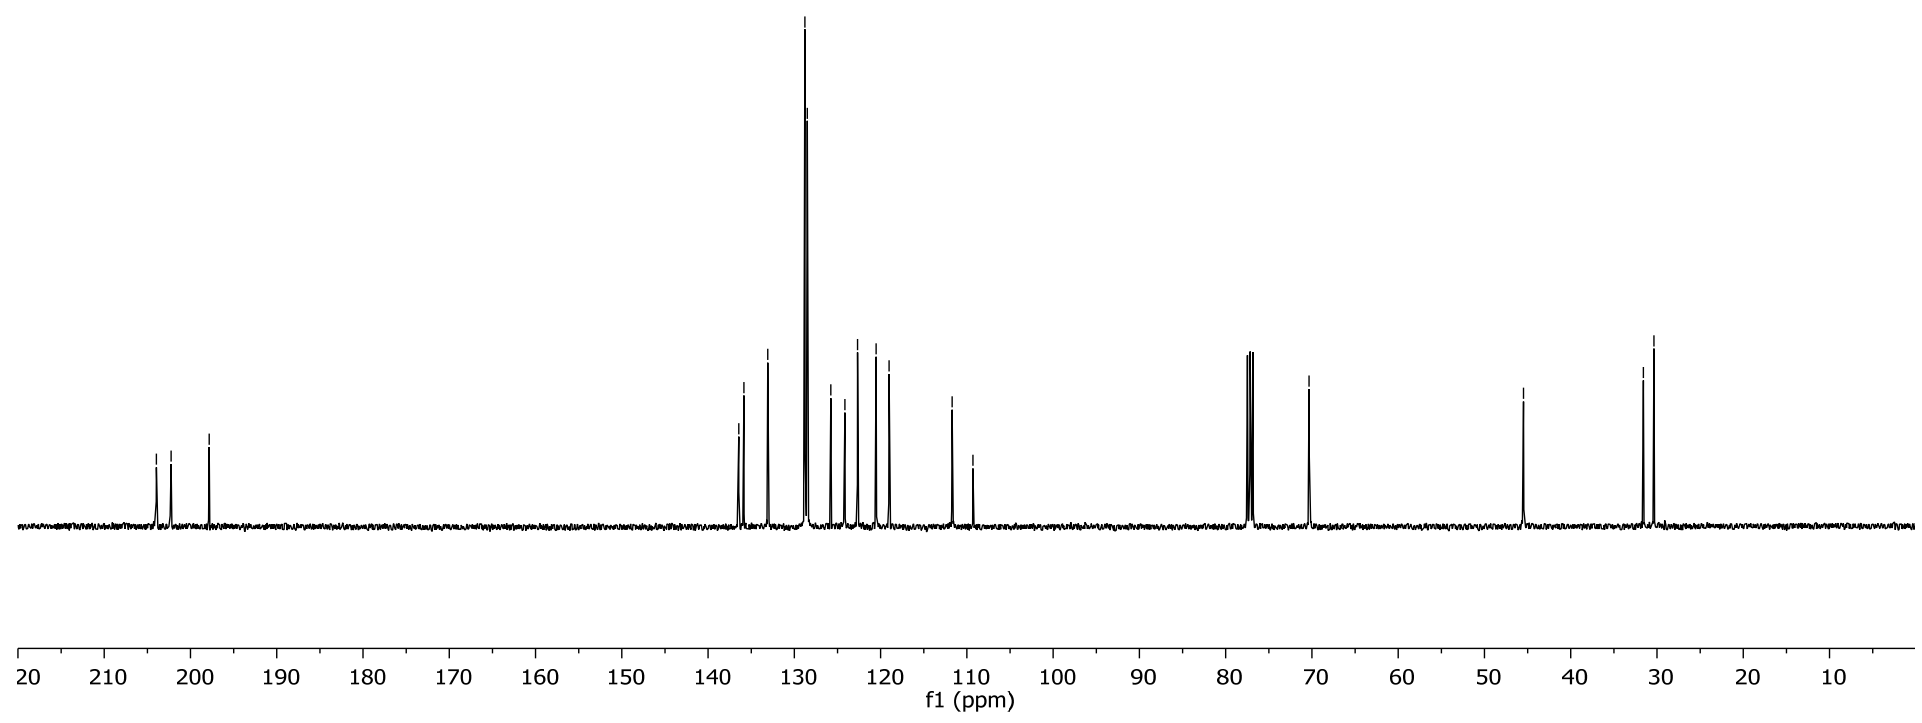

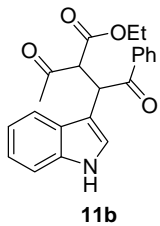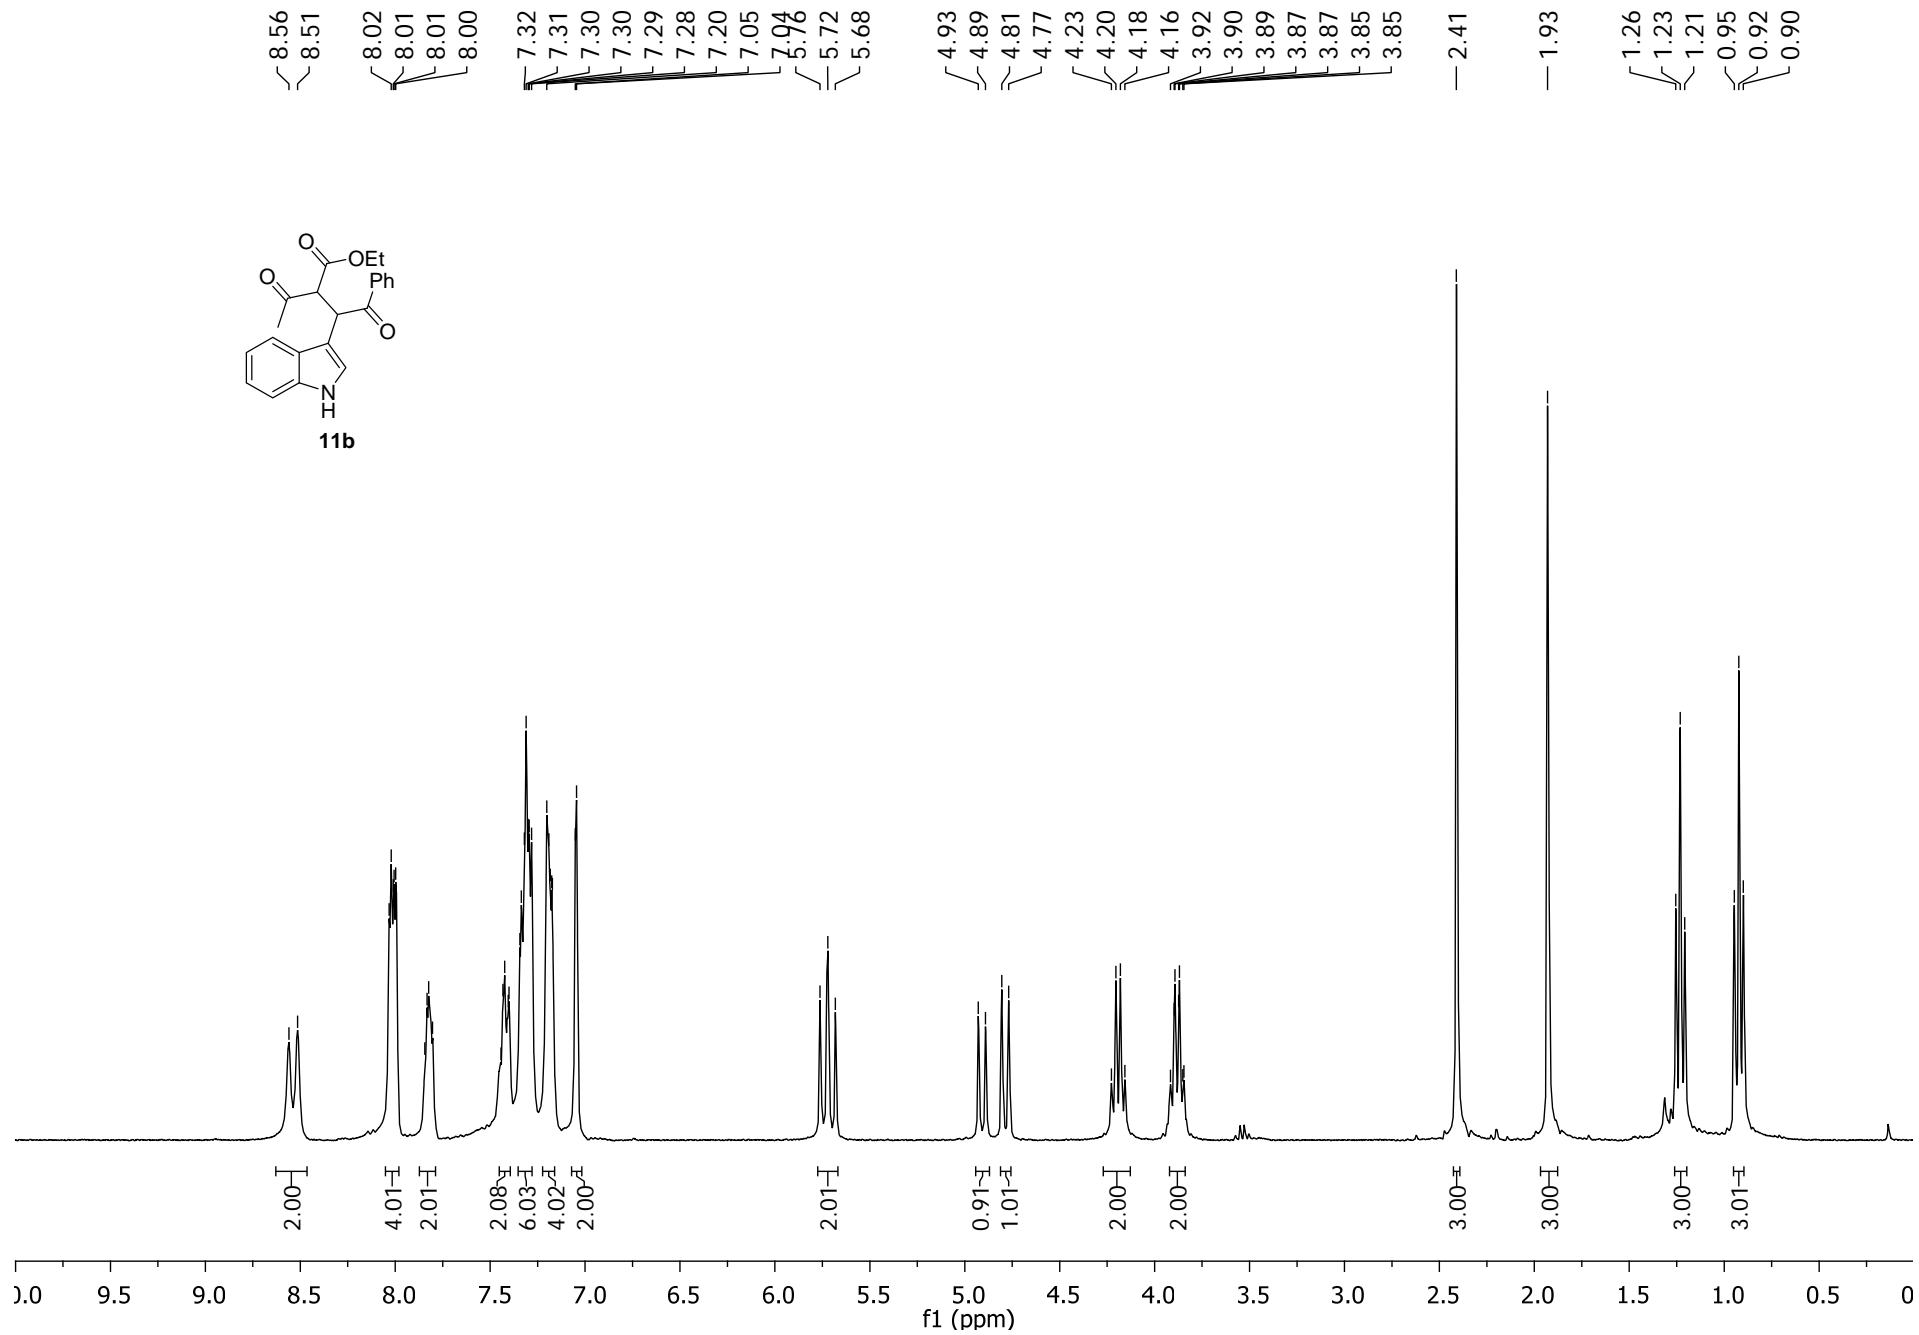

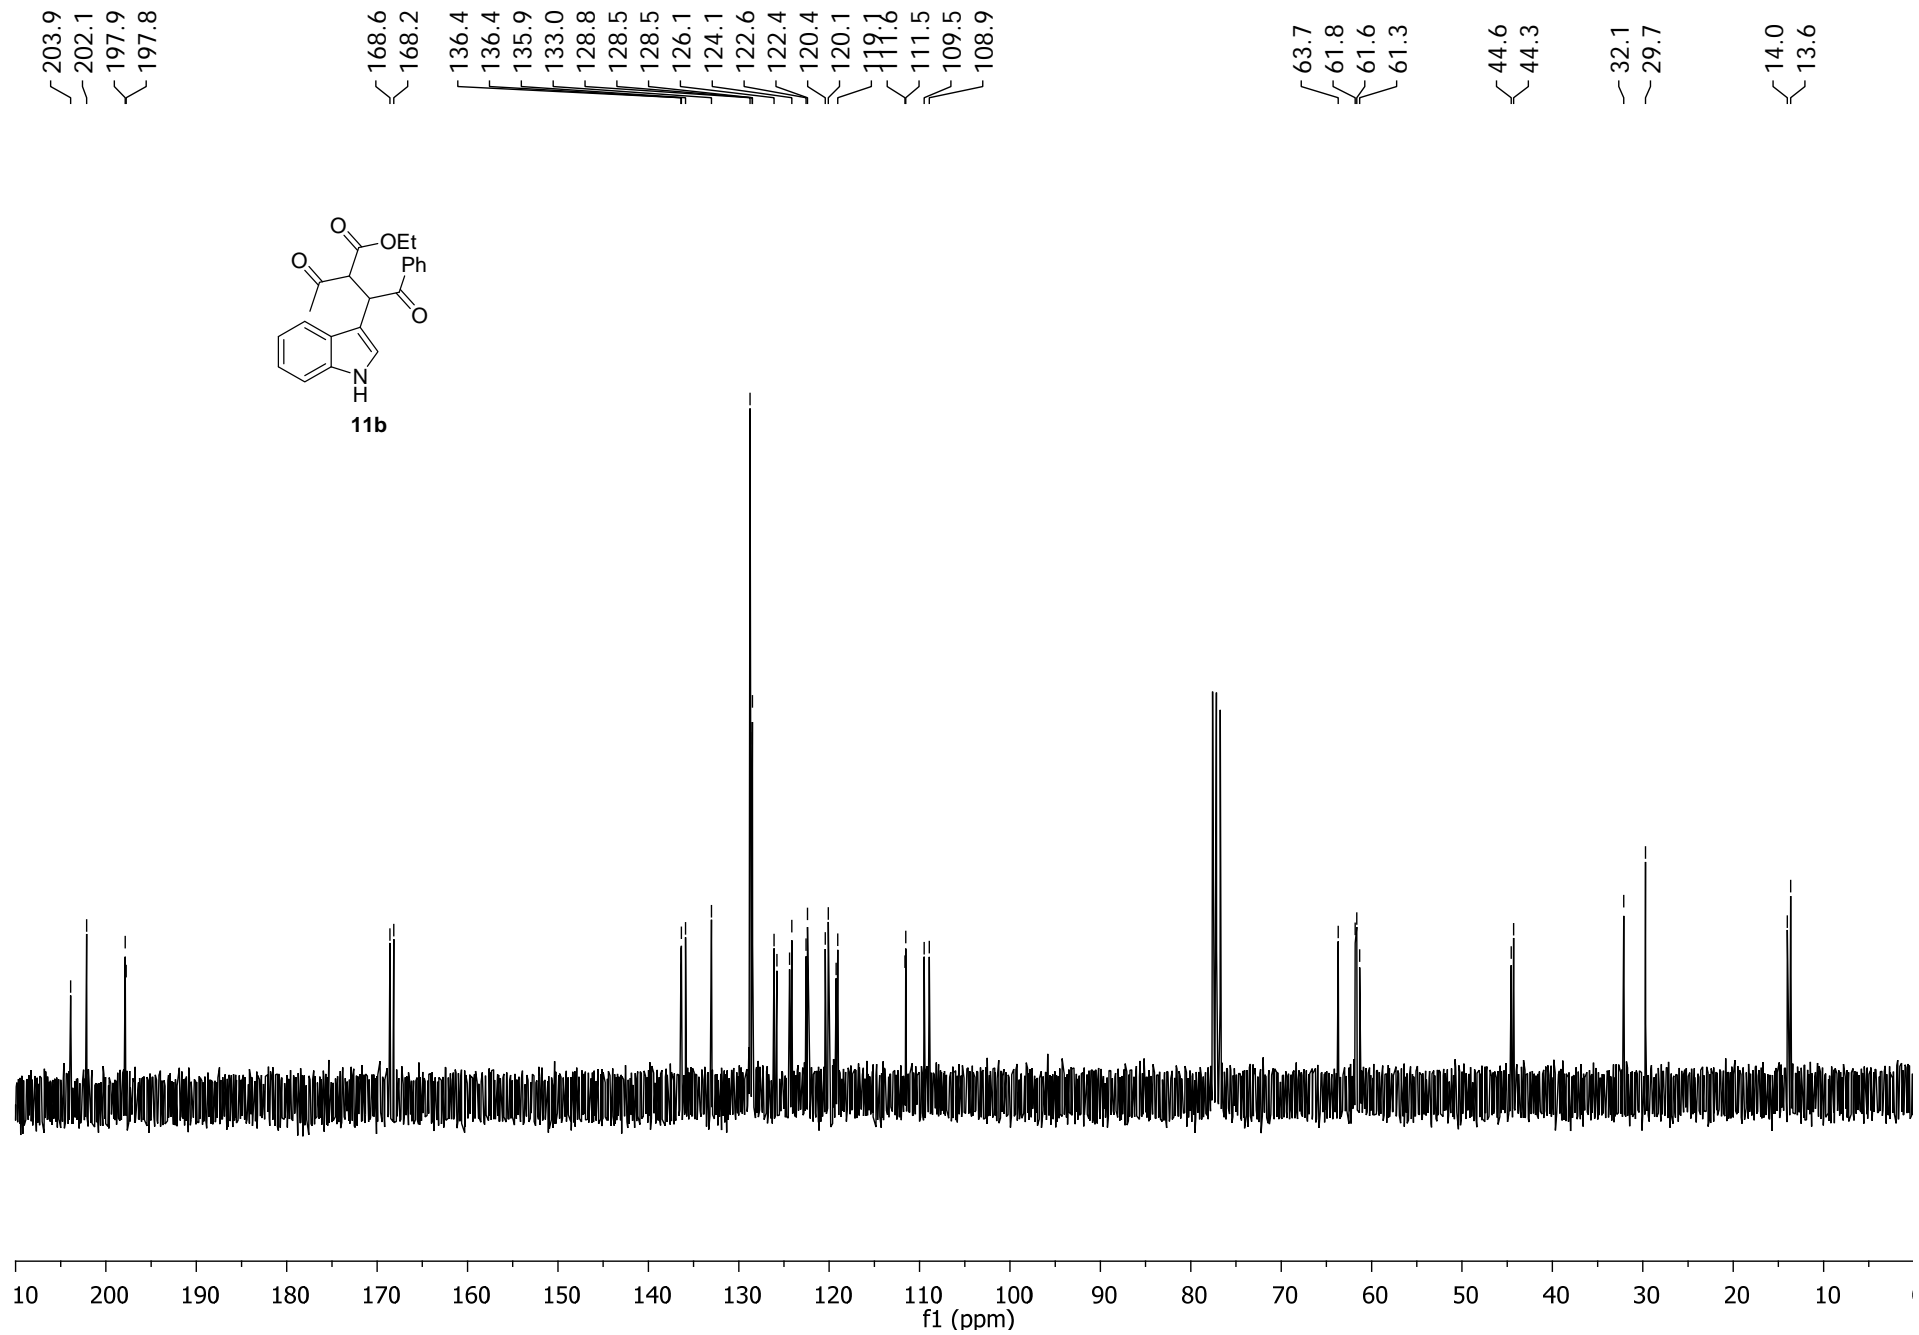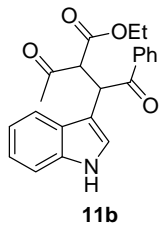

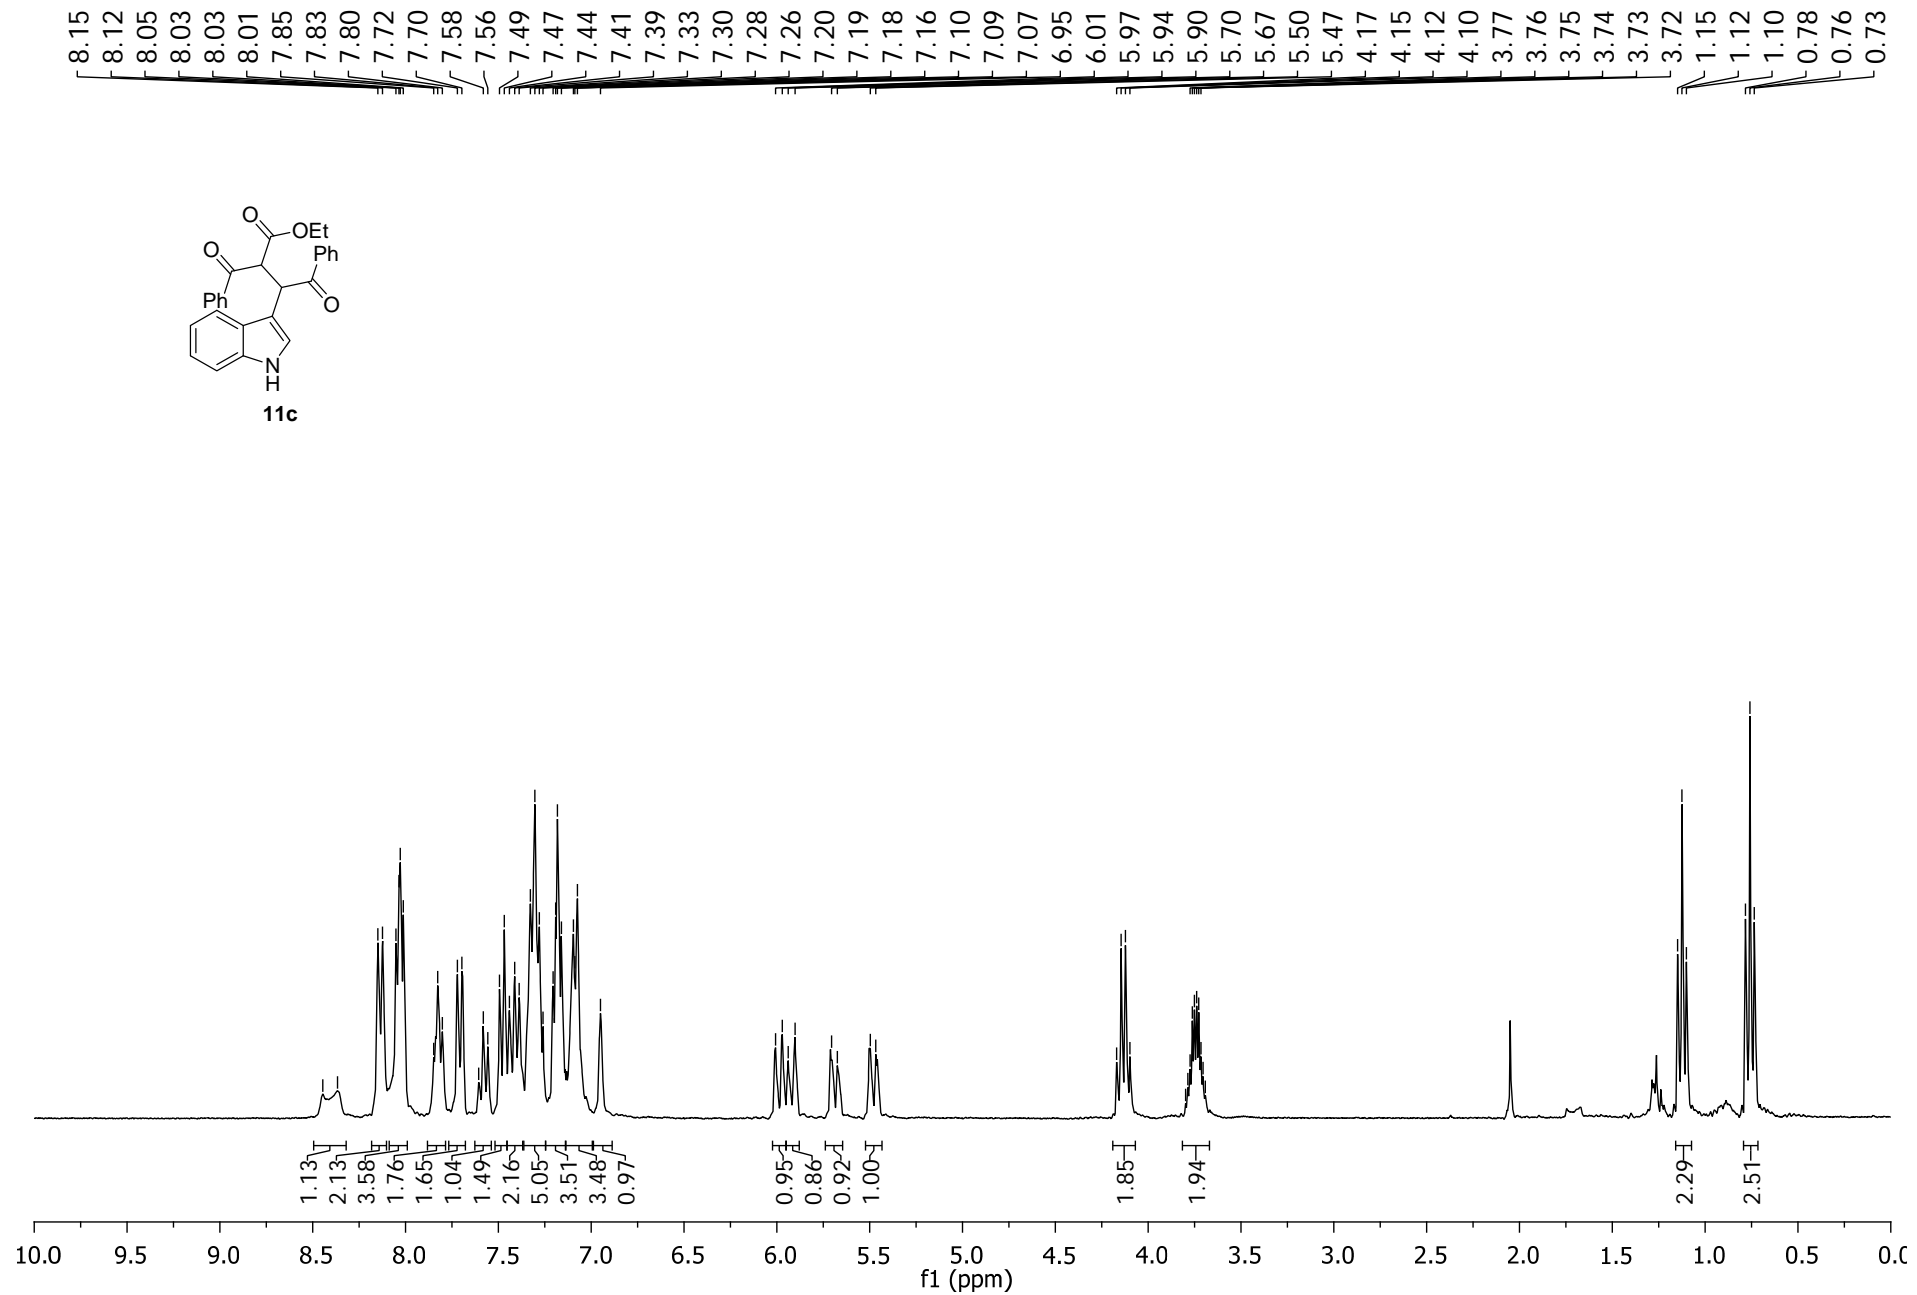

198.2  
197.7  
196.0  
193.9

168.9  
168.7

136.9  
136.5  
136.2  
136.1  
136.0  
136.0  
133.8  
133.2  
133.0  
129.0  
128.9  
128.8  
128.7  
128.5  
128.2  
126.3  
126.0  
124.2  
122.5  
122.3  
120.3  
120.2  
119.4  
119.1  
111.5  
111.8  
61.6  
59.1  
56.2

45.4  
44.9

14.0  
13.6

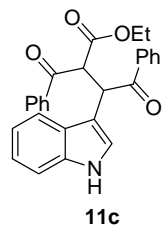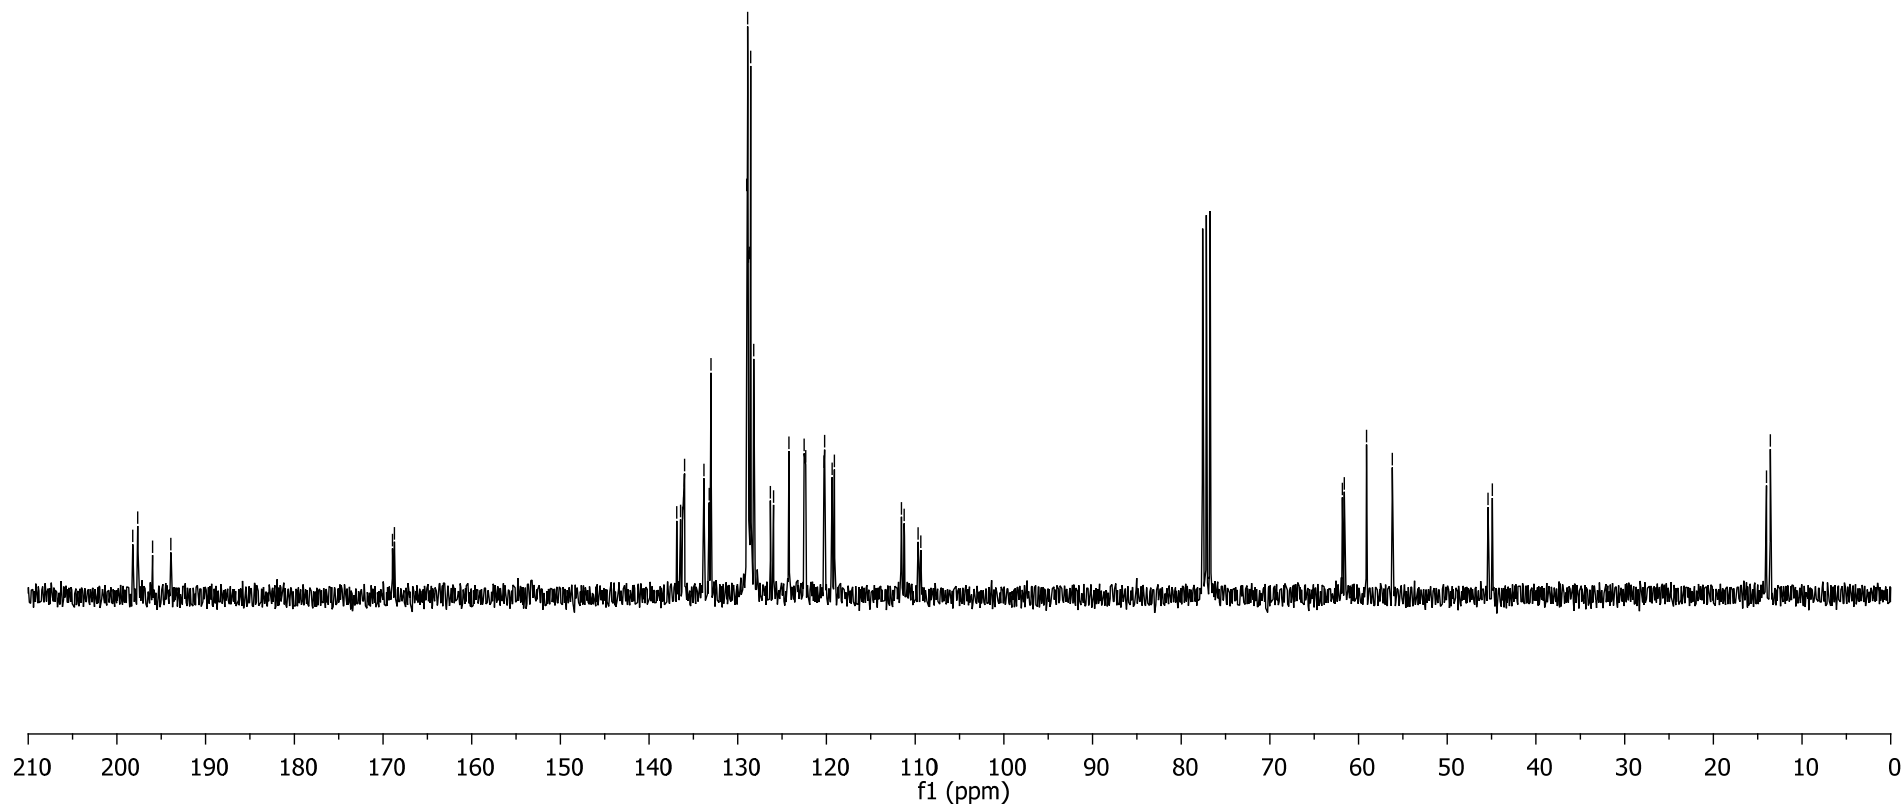

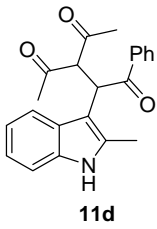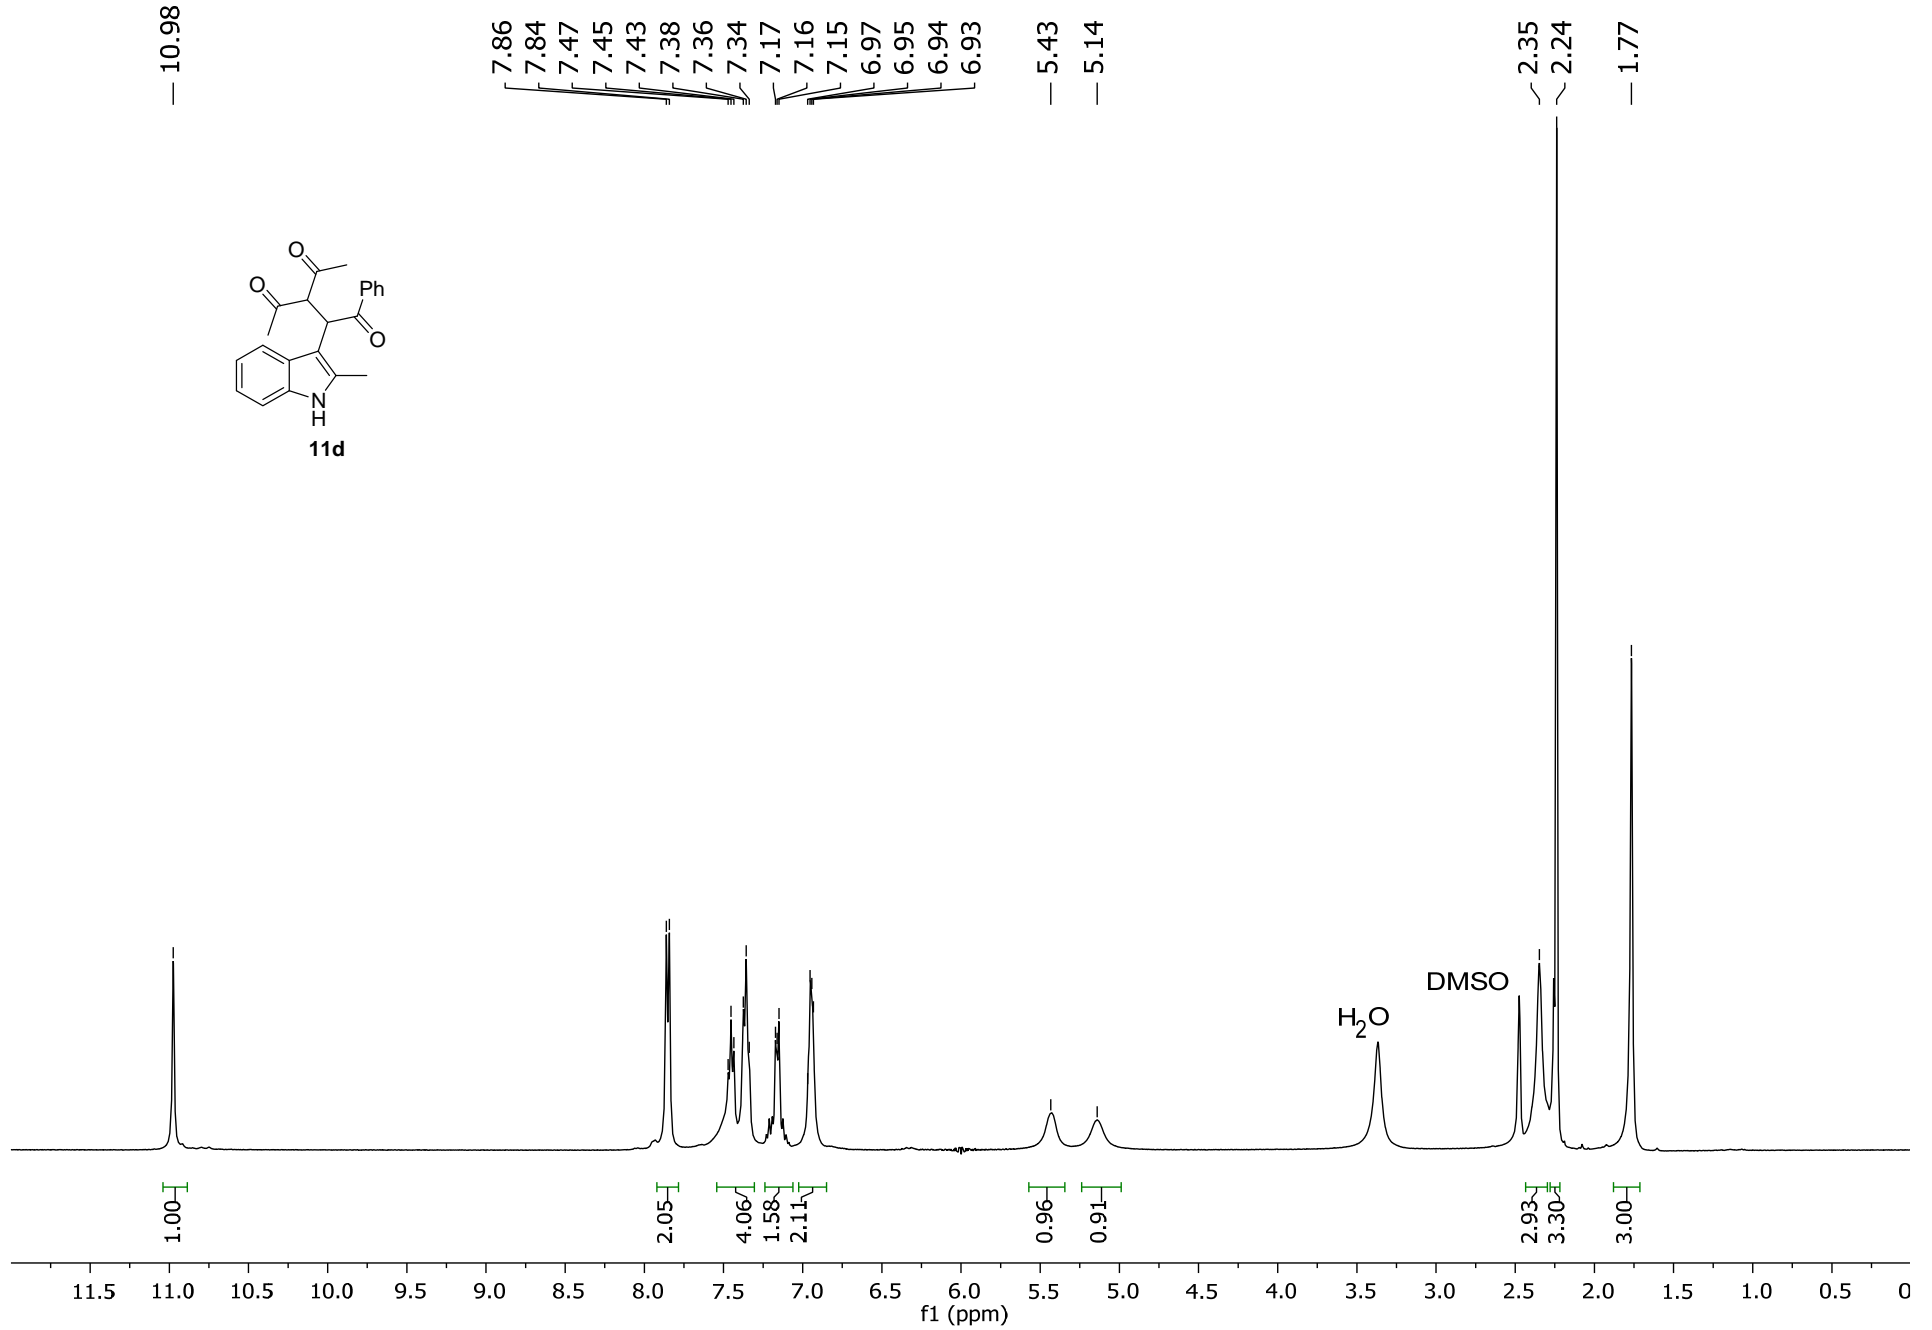

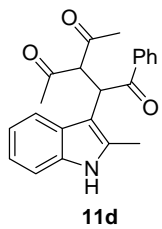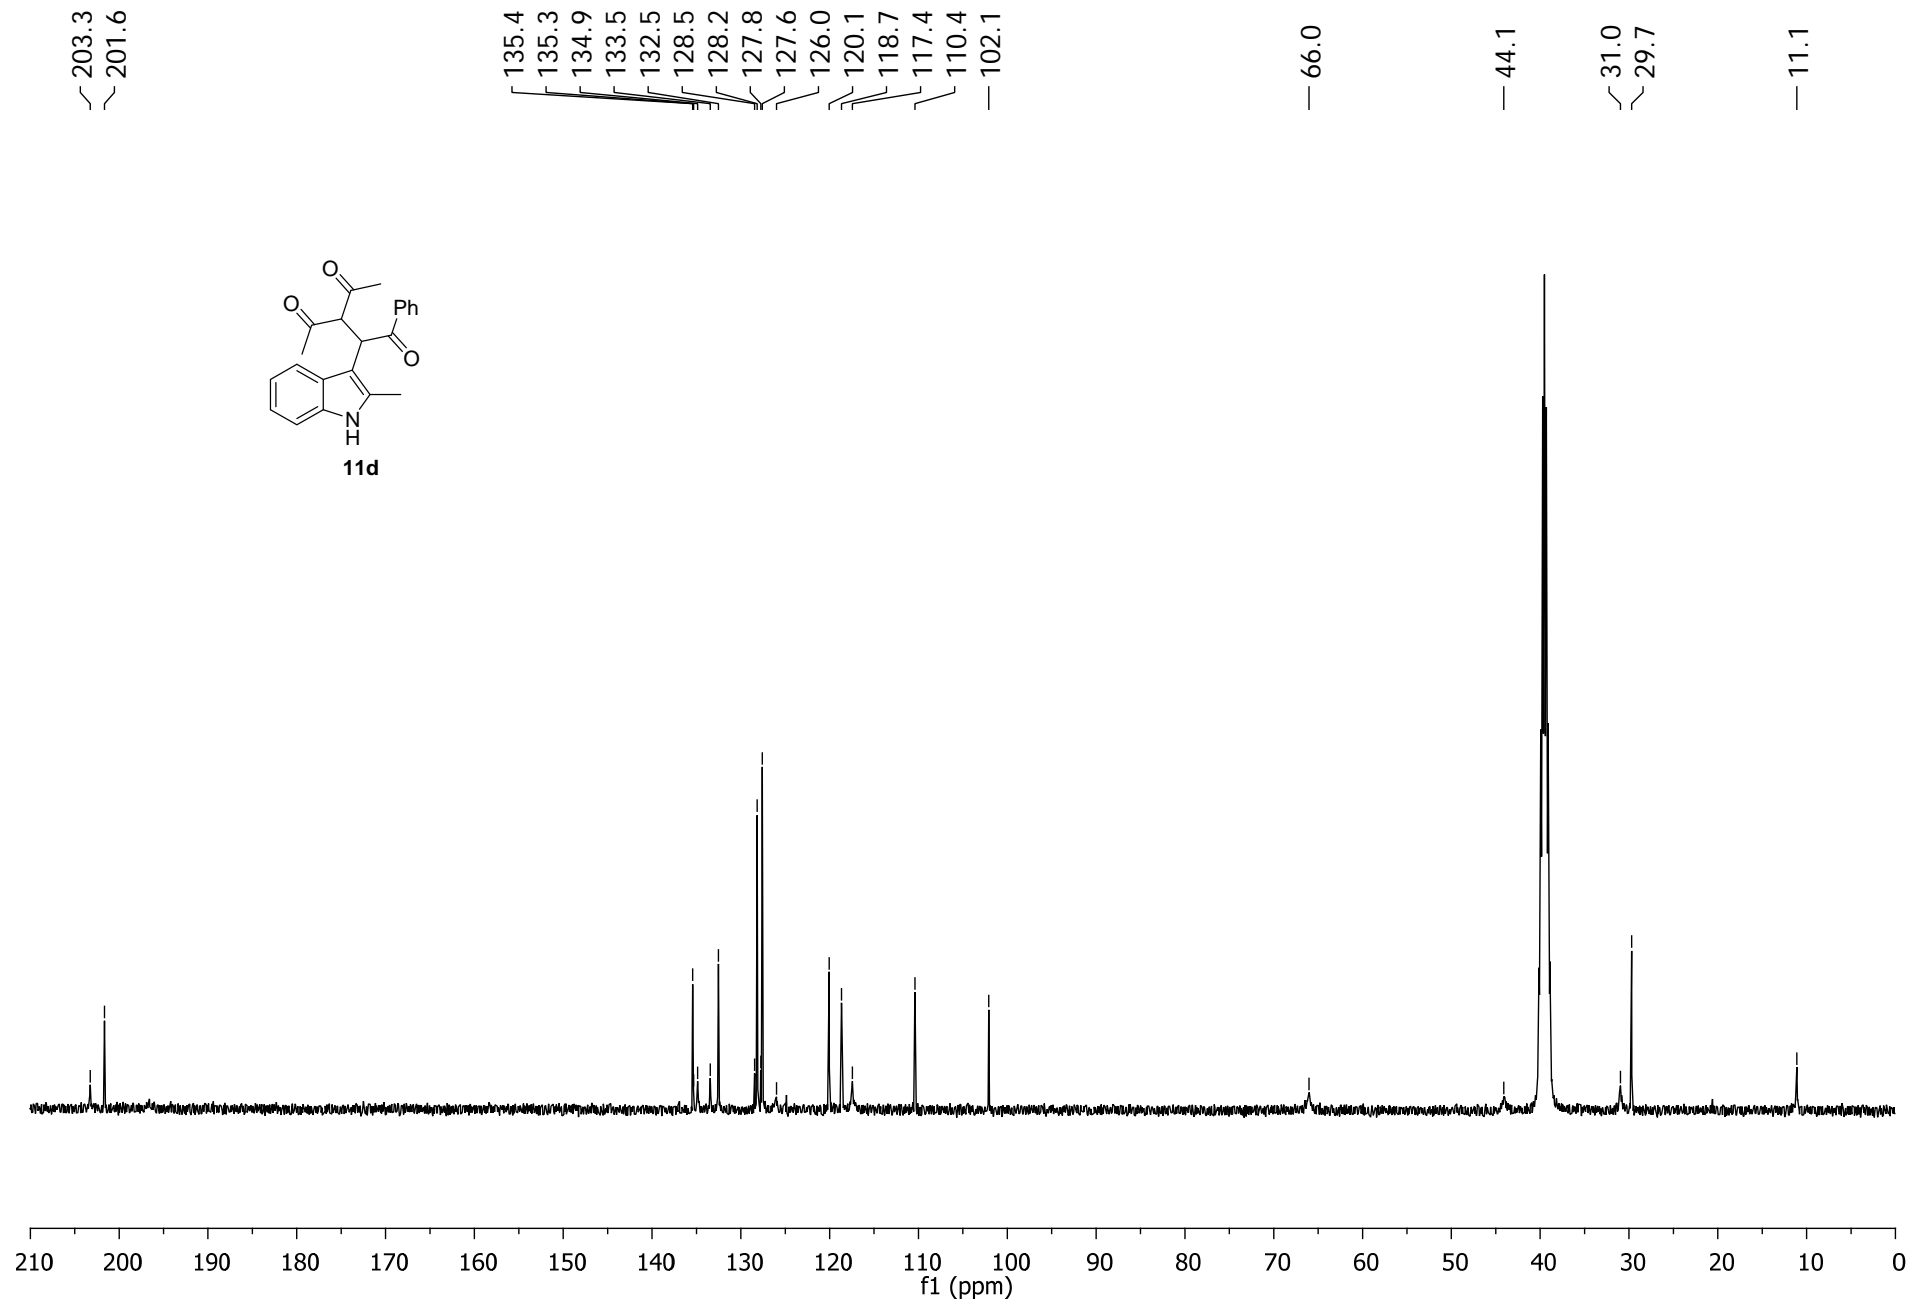

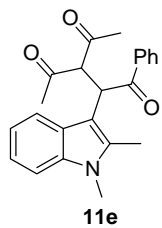

7.91  
7.89  
7.64  
7.41  
7.38  
7.36  
7.31  
7.28  
7.26  
7.14  
7.12

— 5.58  
— 5.29

— 3.53

— 2.47  
— 2.33

— 1.82

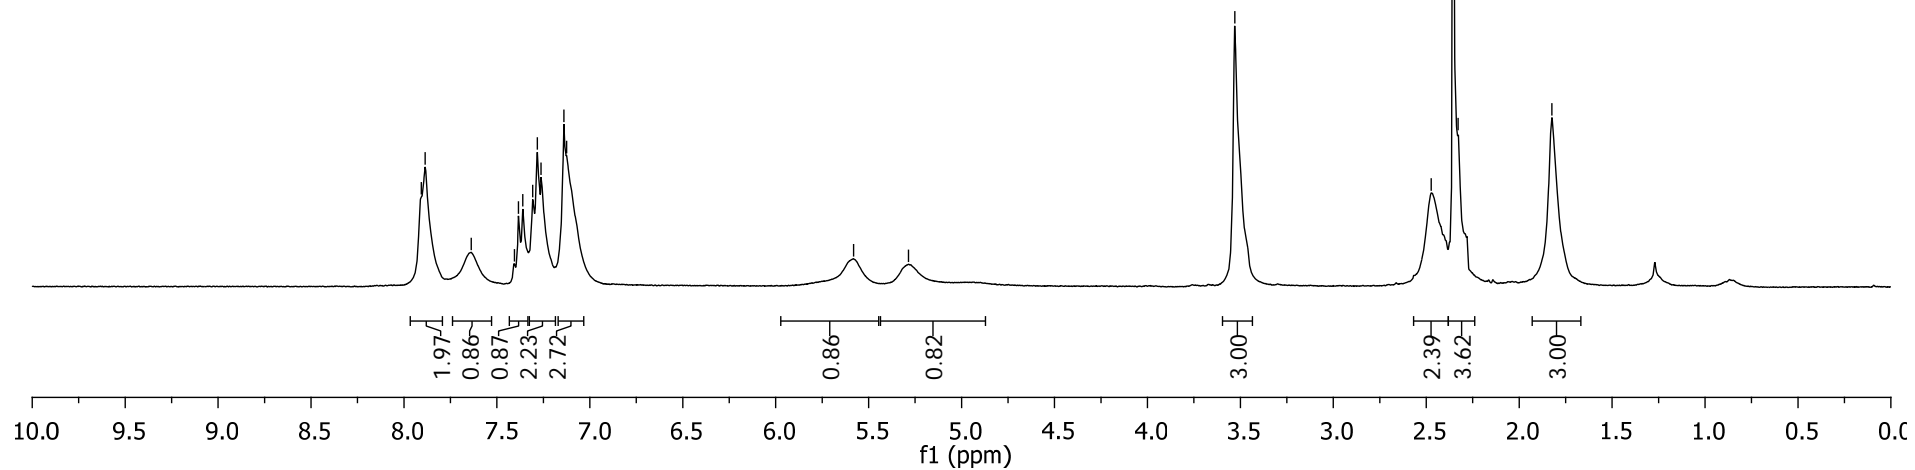



203.4  
201.4  
197.6

136.9  
136.3  
132.8  
128.5  
128.4  
121.1  
119.9  
118.8  
109.0  
103.5

67.2

46.4

32.6  
30.6  
29.8

10.7

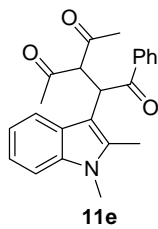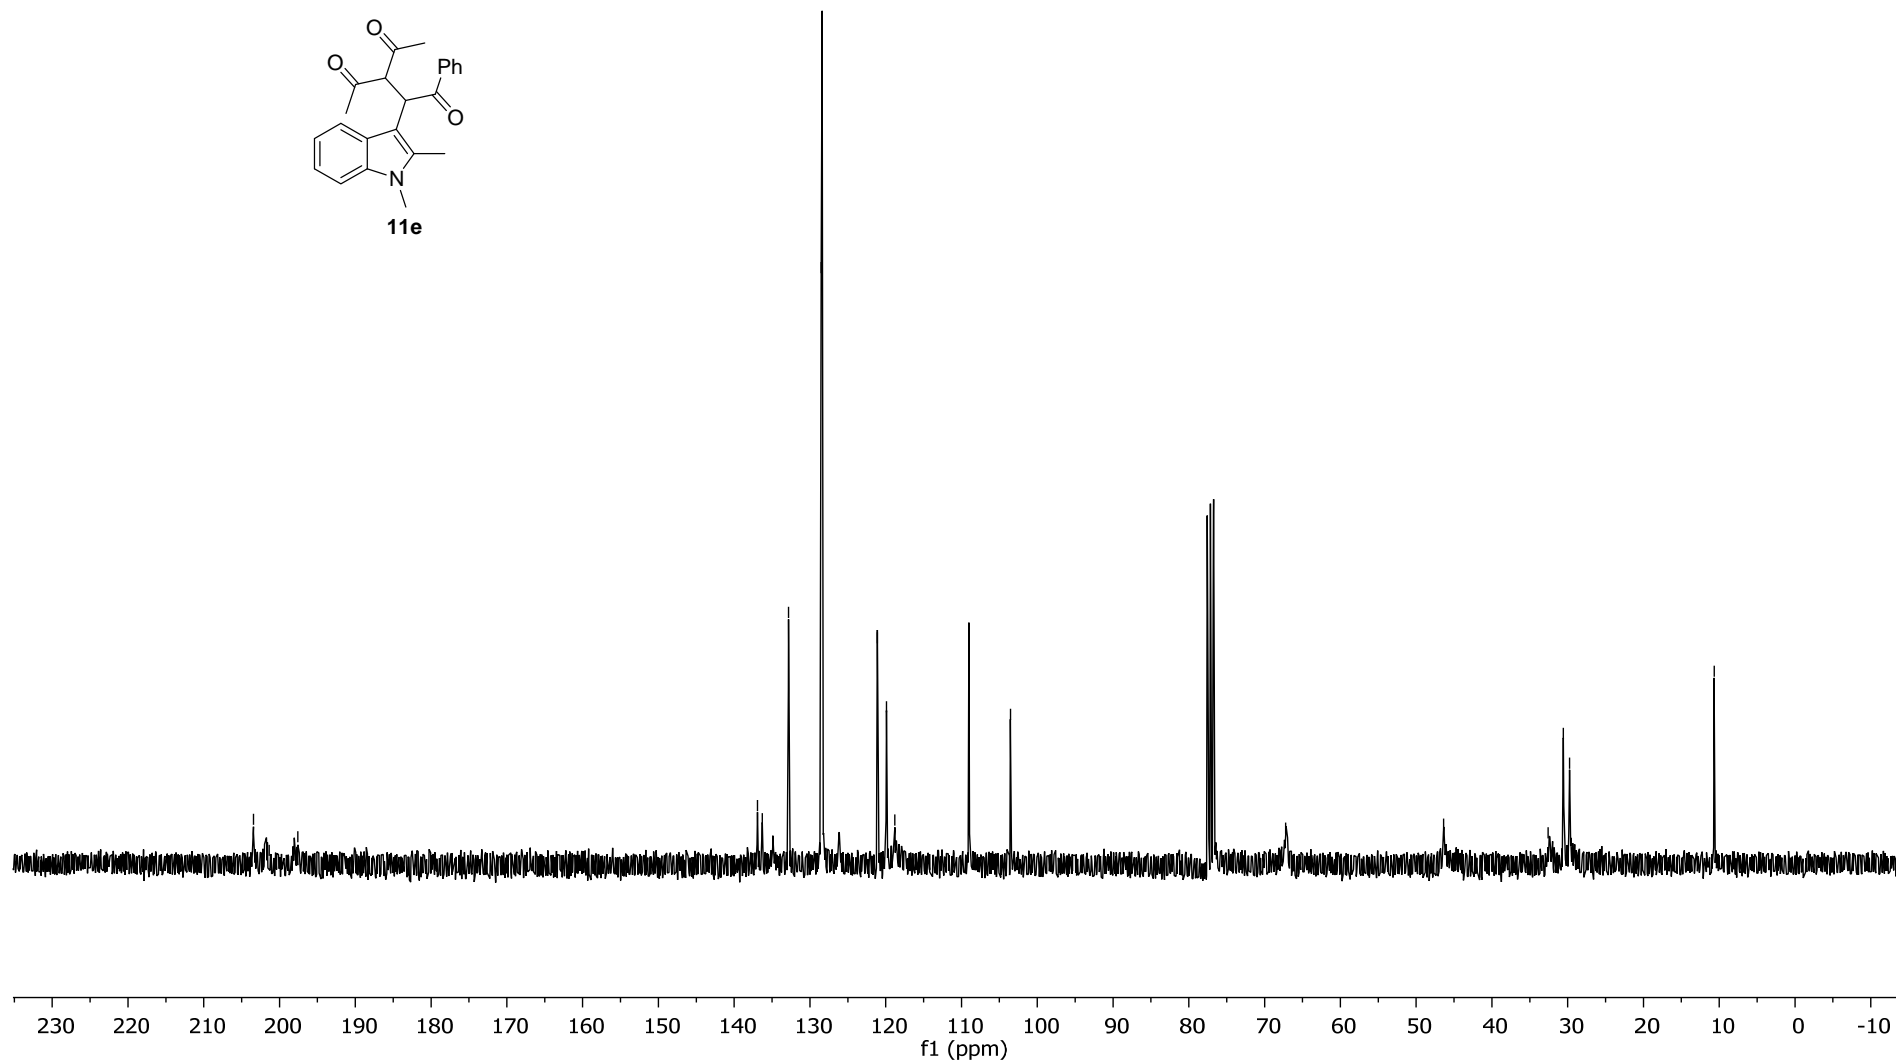

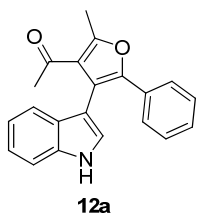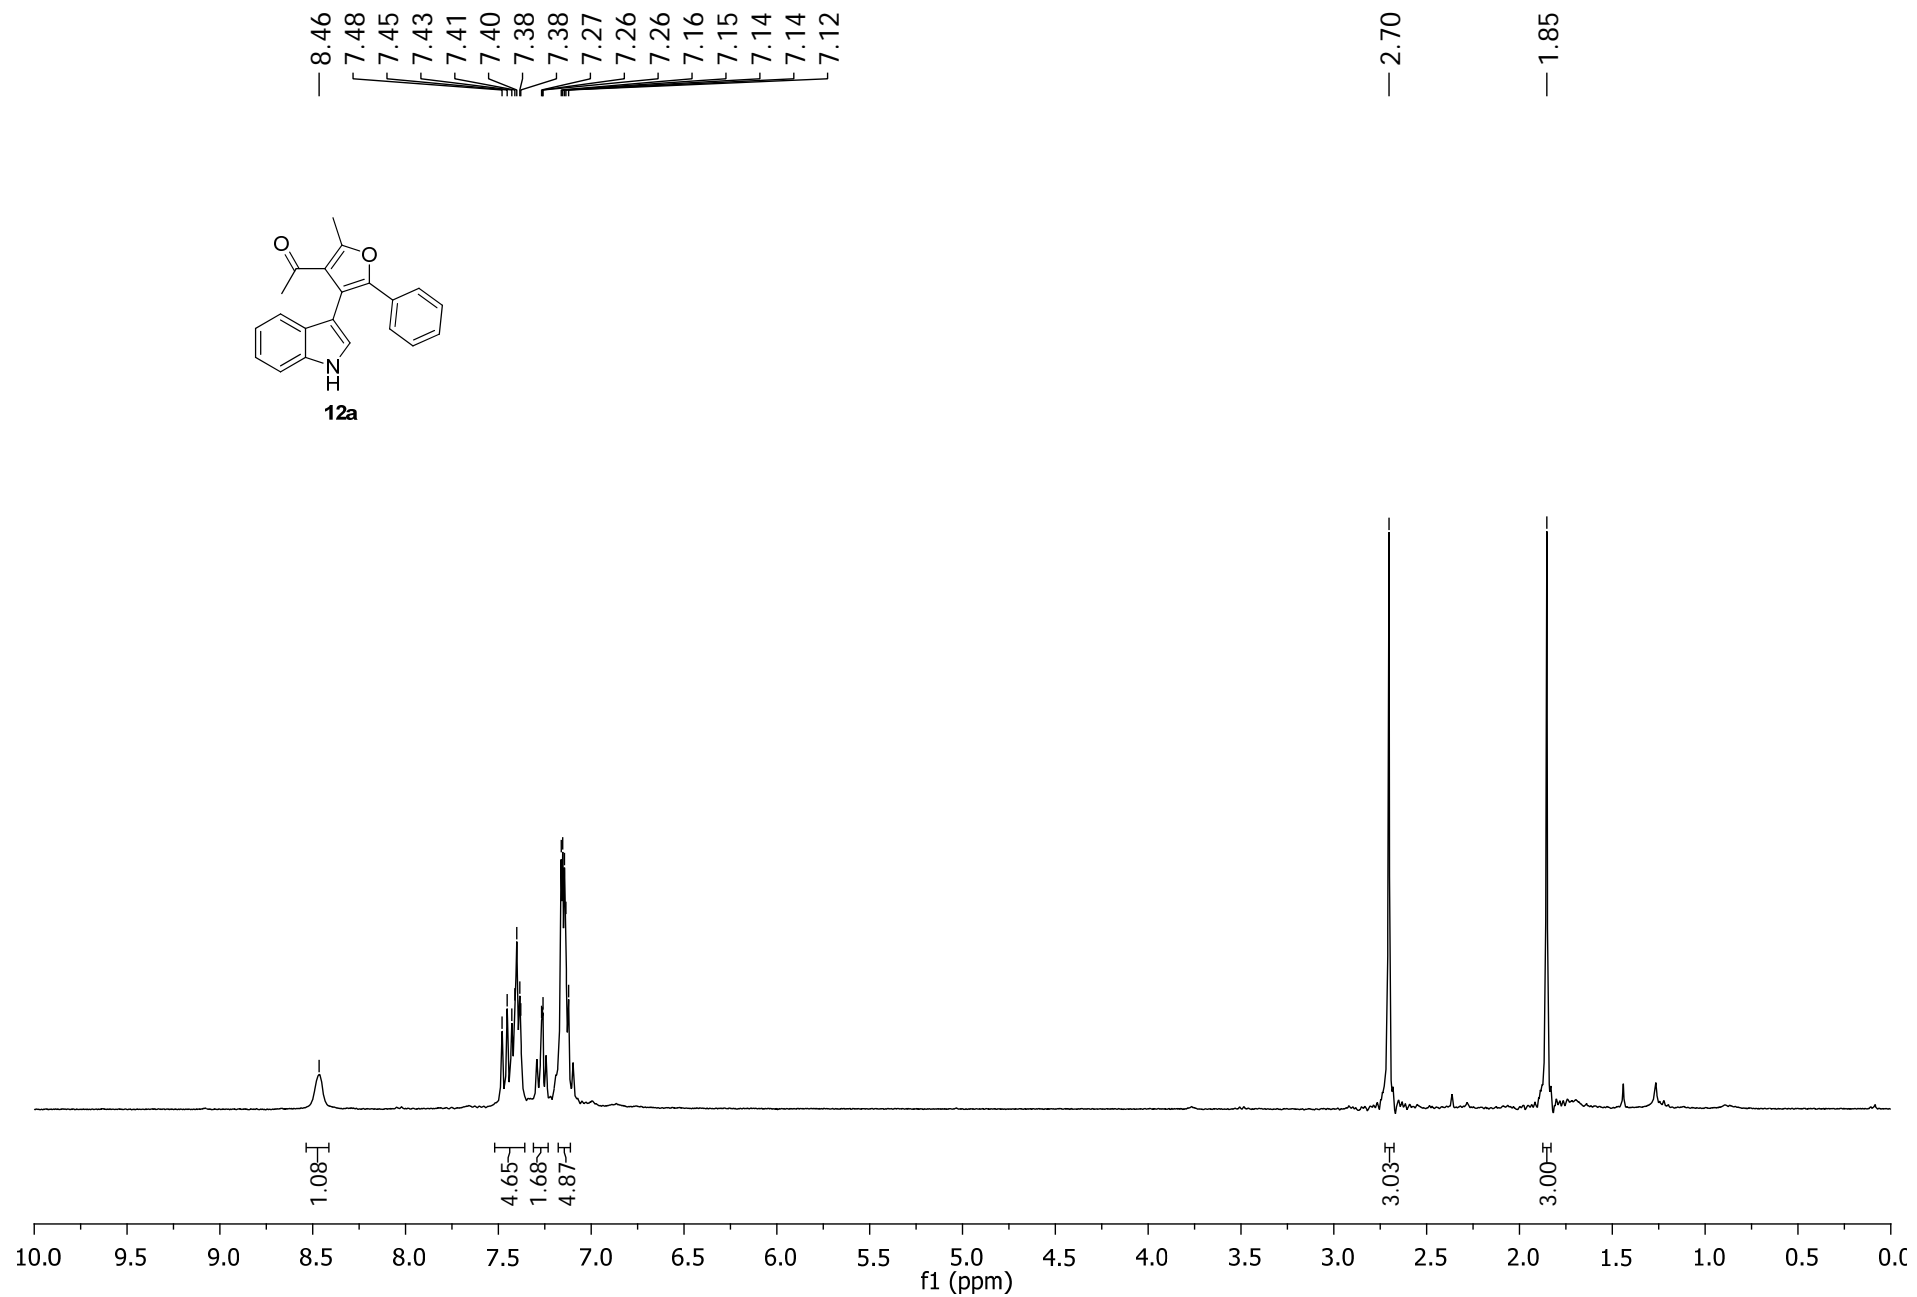

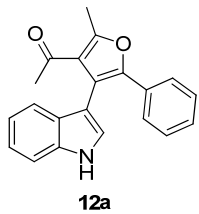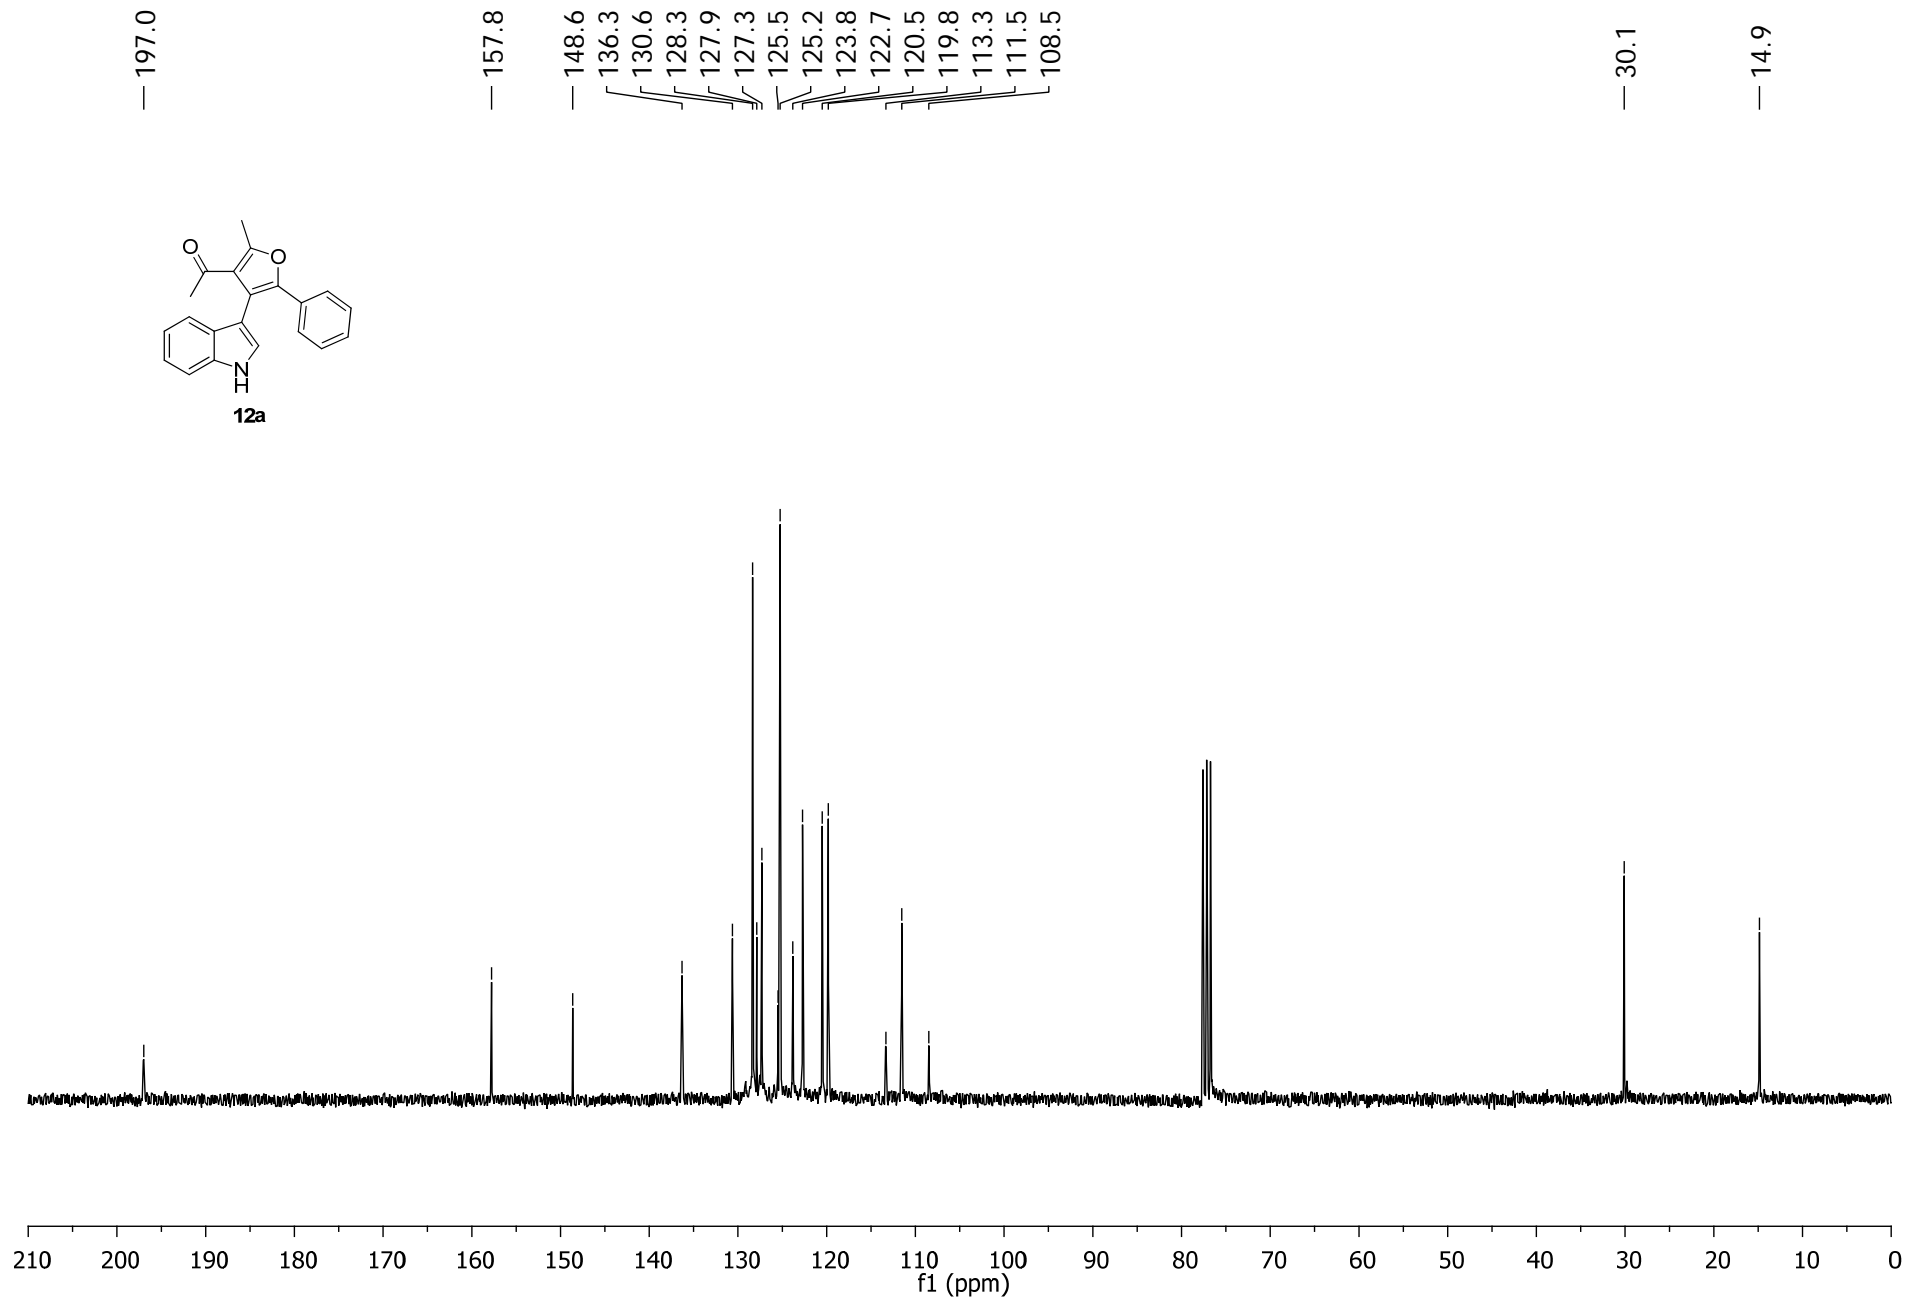

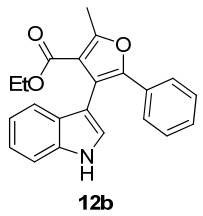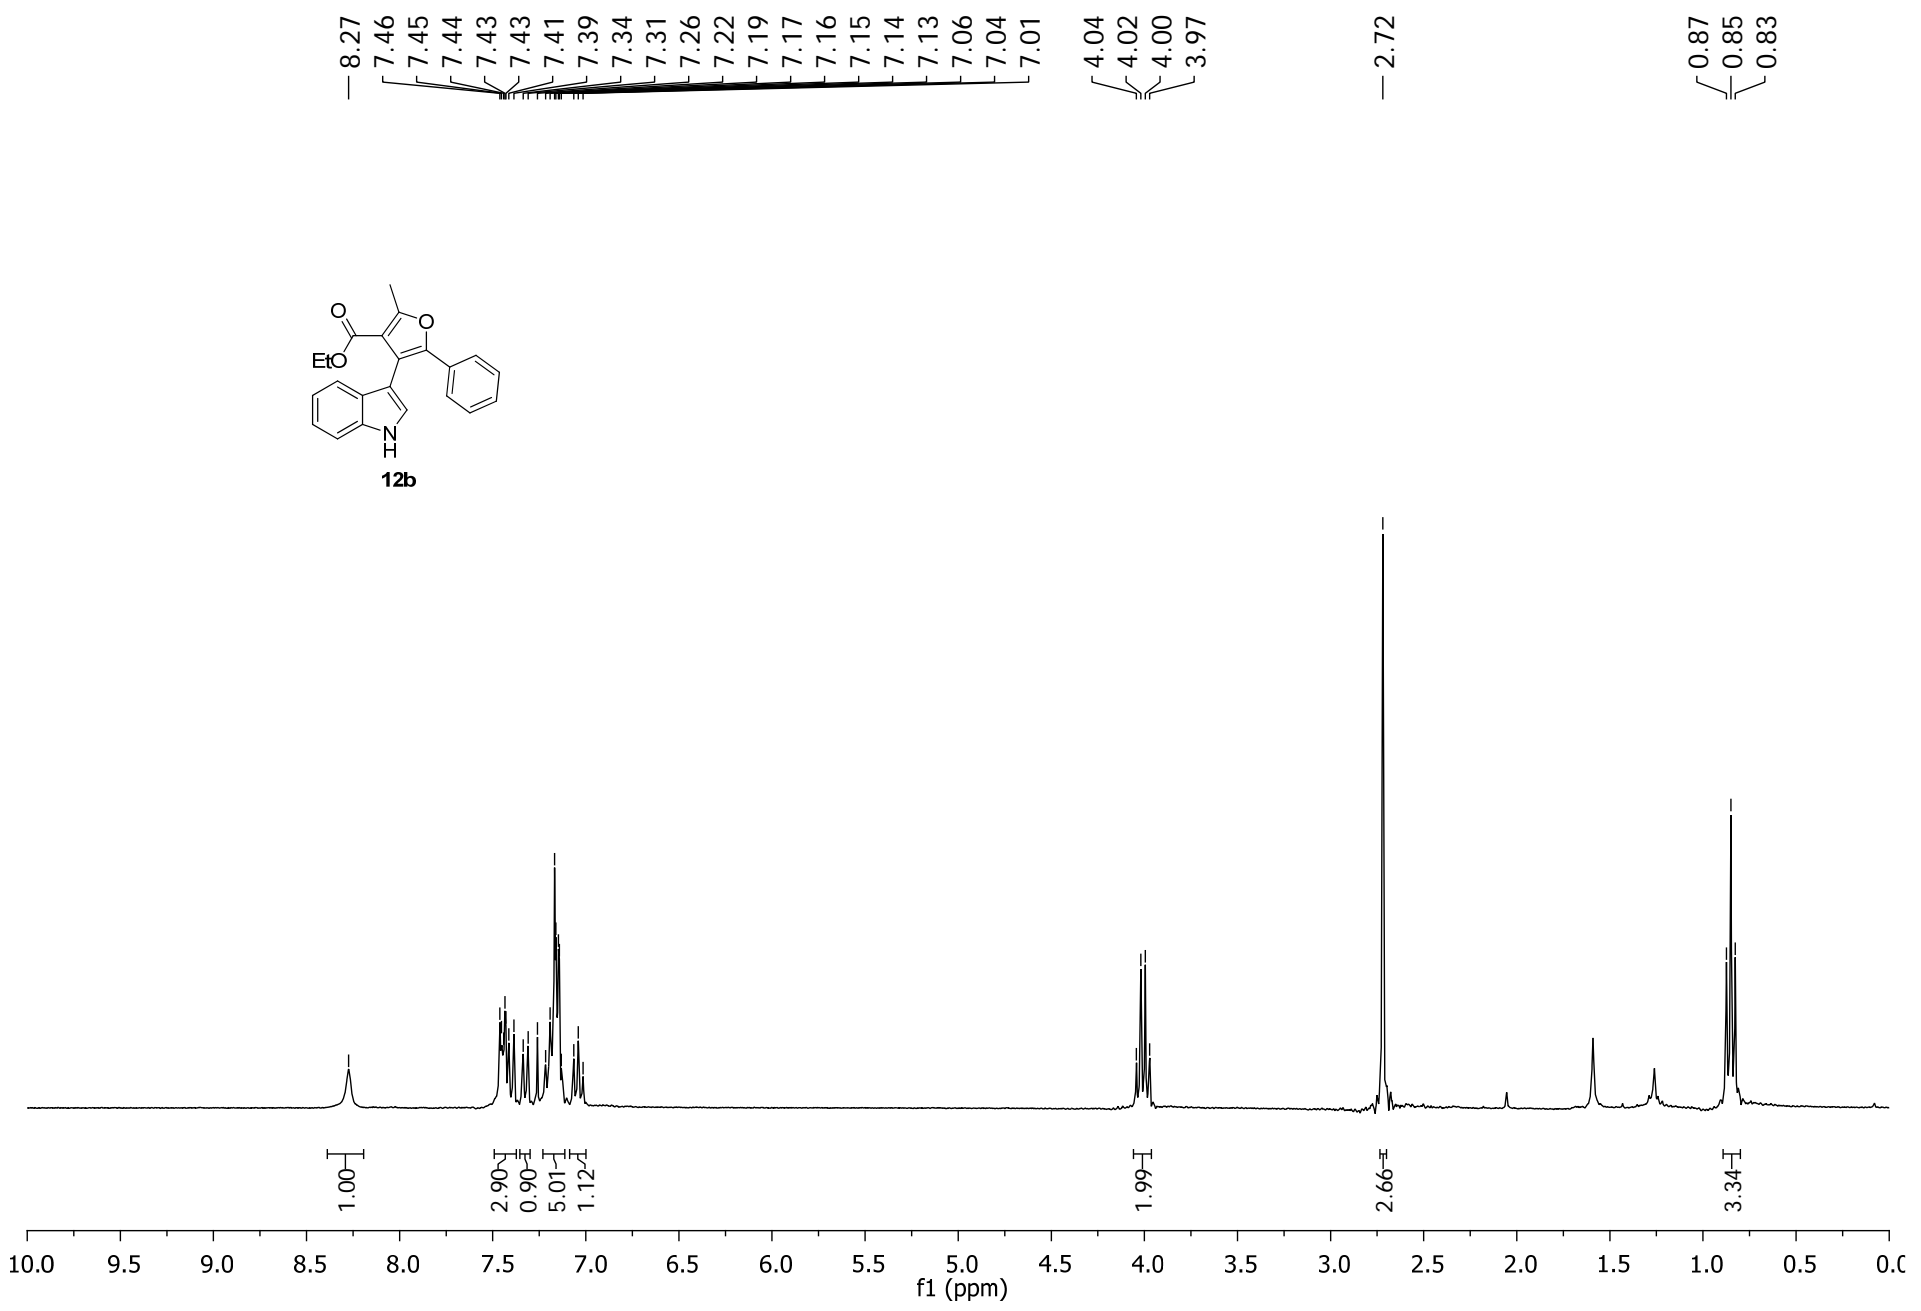

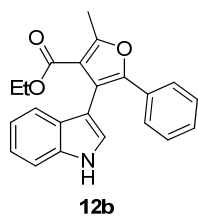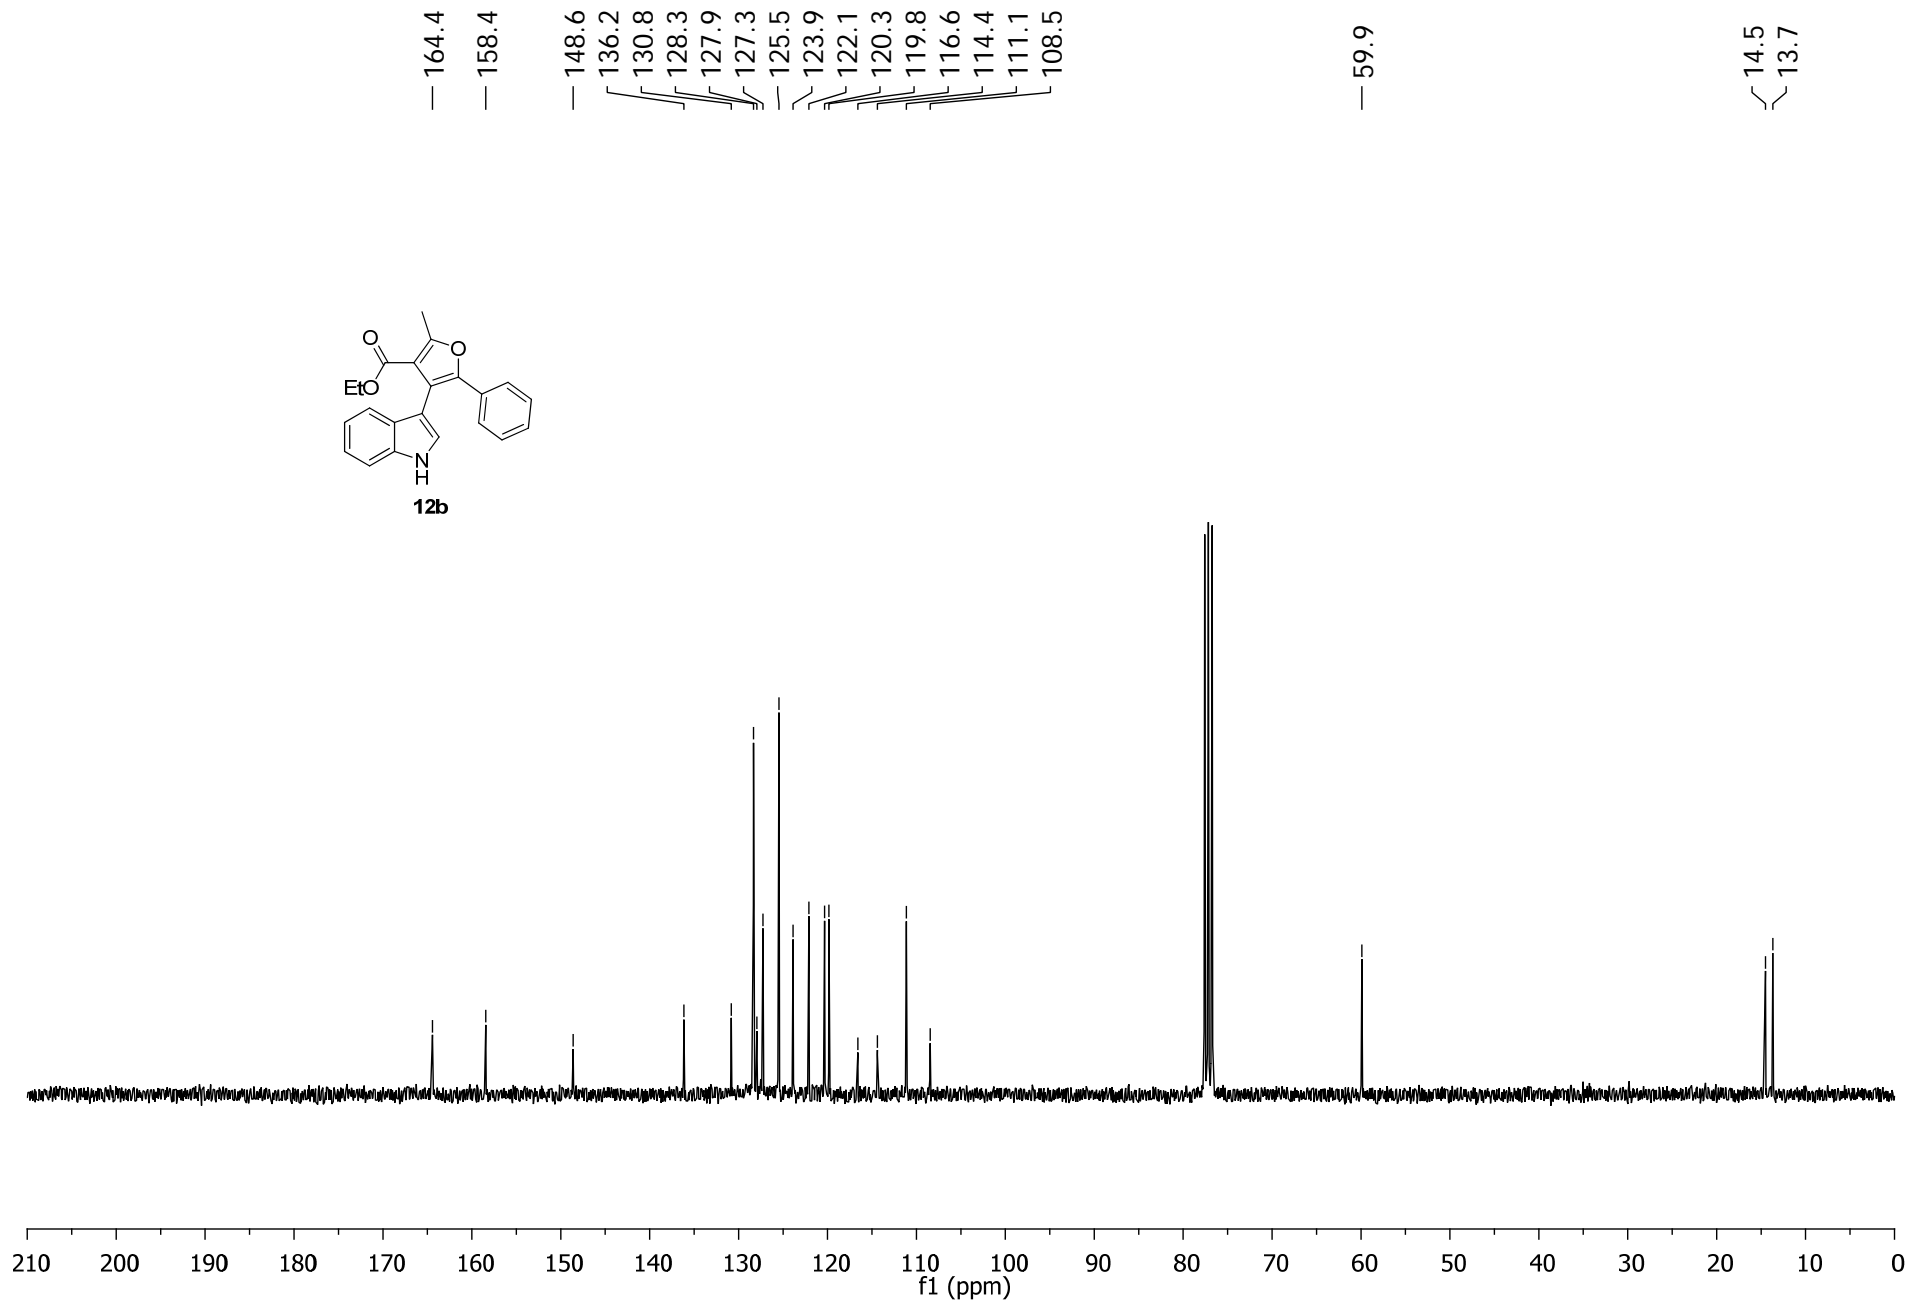

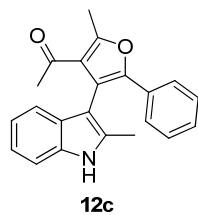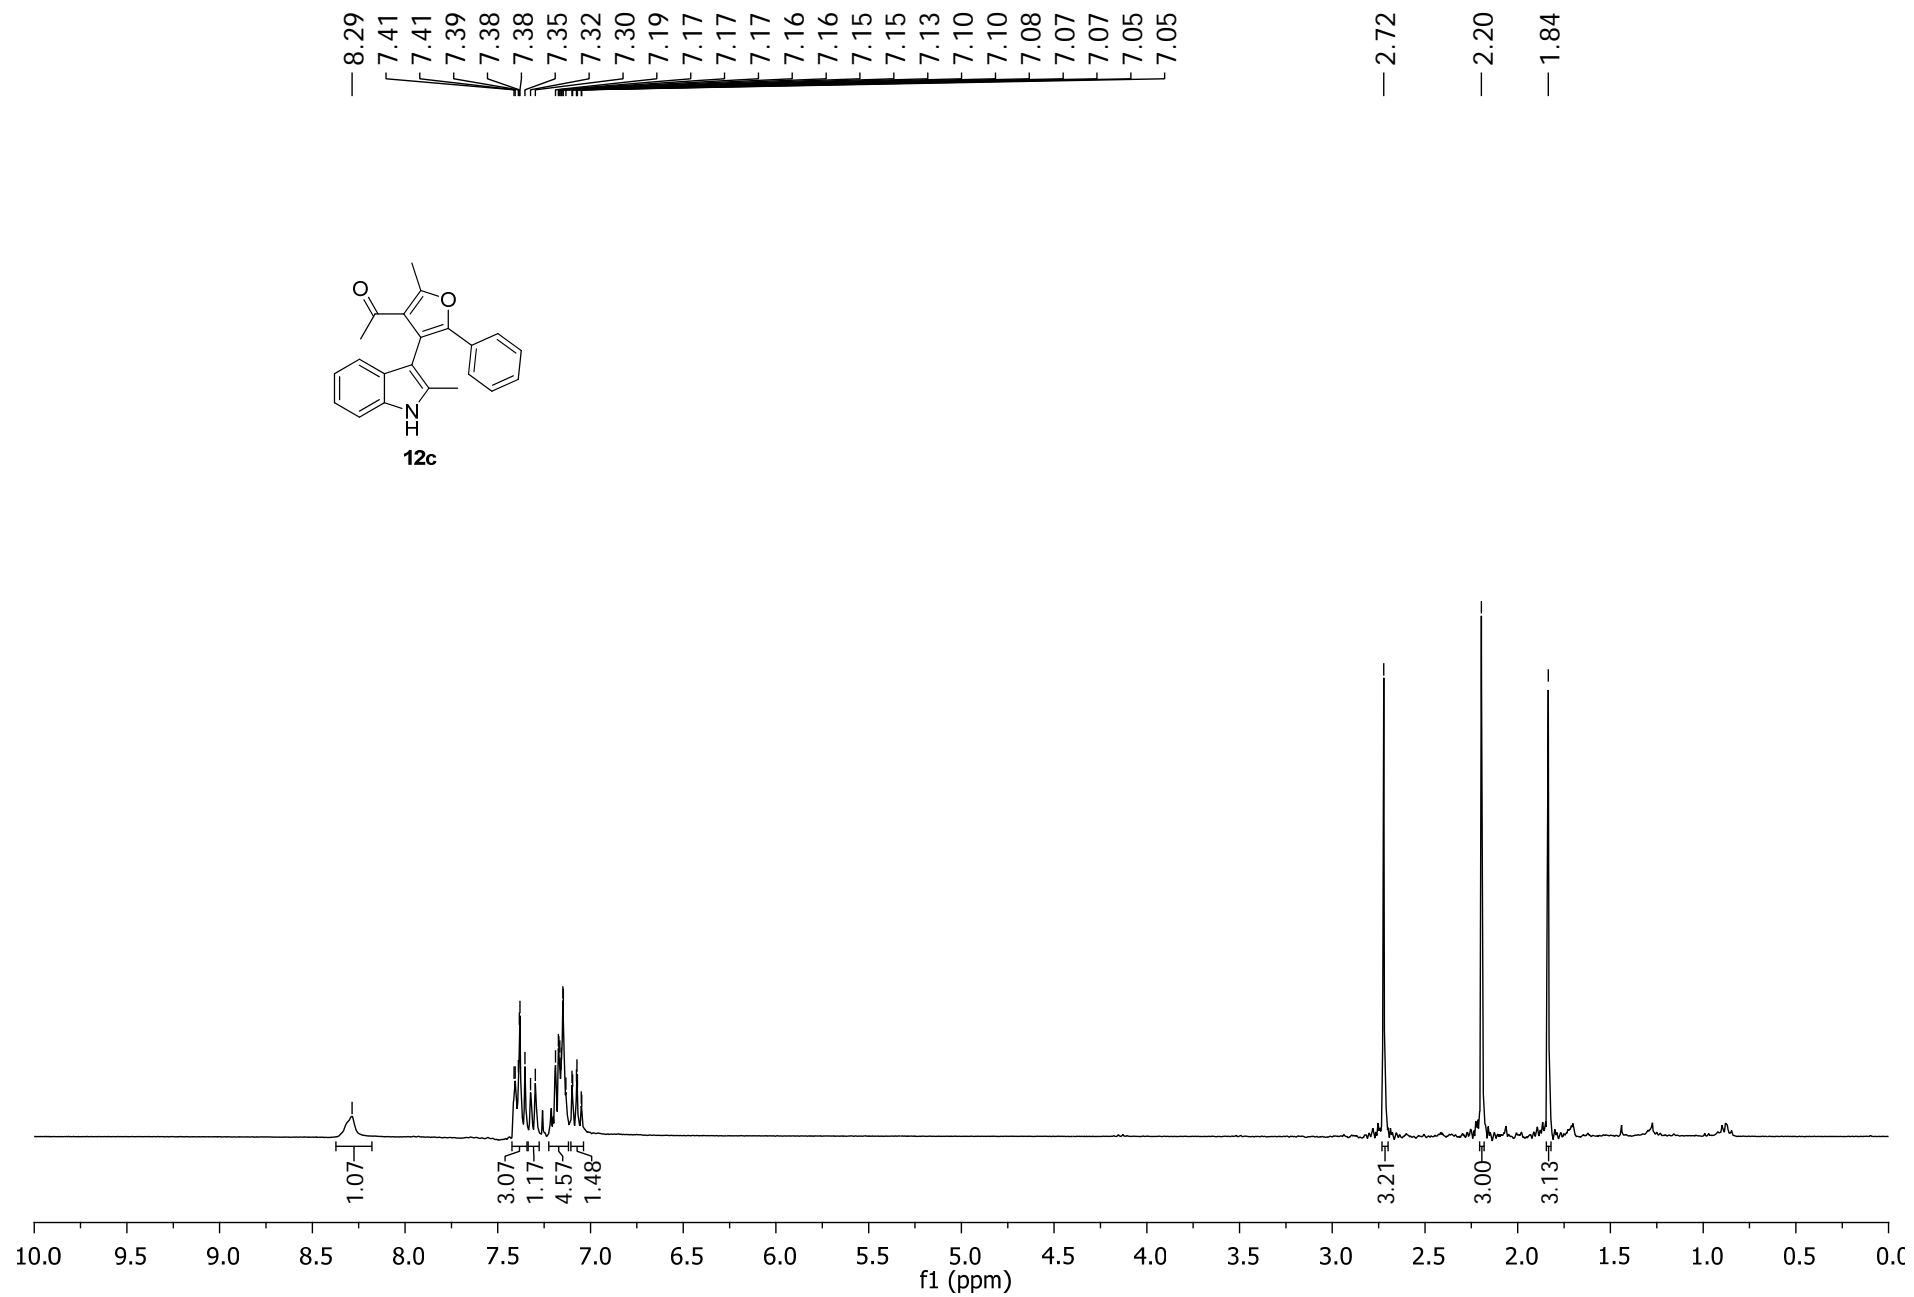

— 196.9

— 158.1

— 148.5

135.8

133.0

130.8

129.0

128.5

127.2

125.2

124.8

121.9

120.4

119.1

113.1

110.6

105.5

— 29.7

~ 14.9

~ 12.2

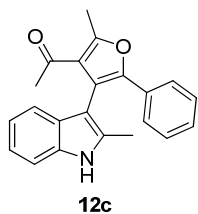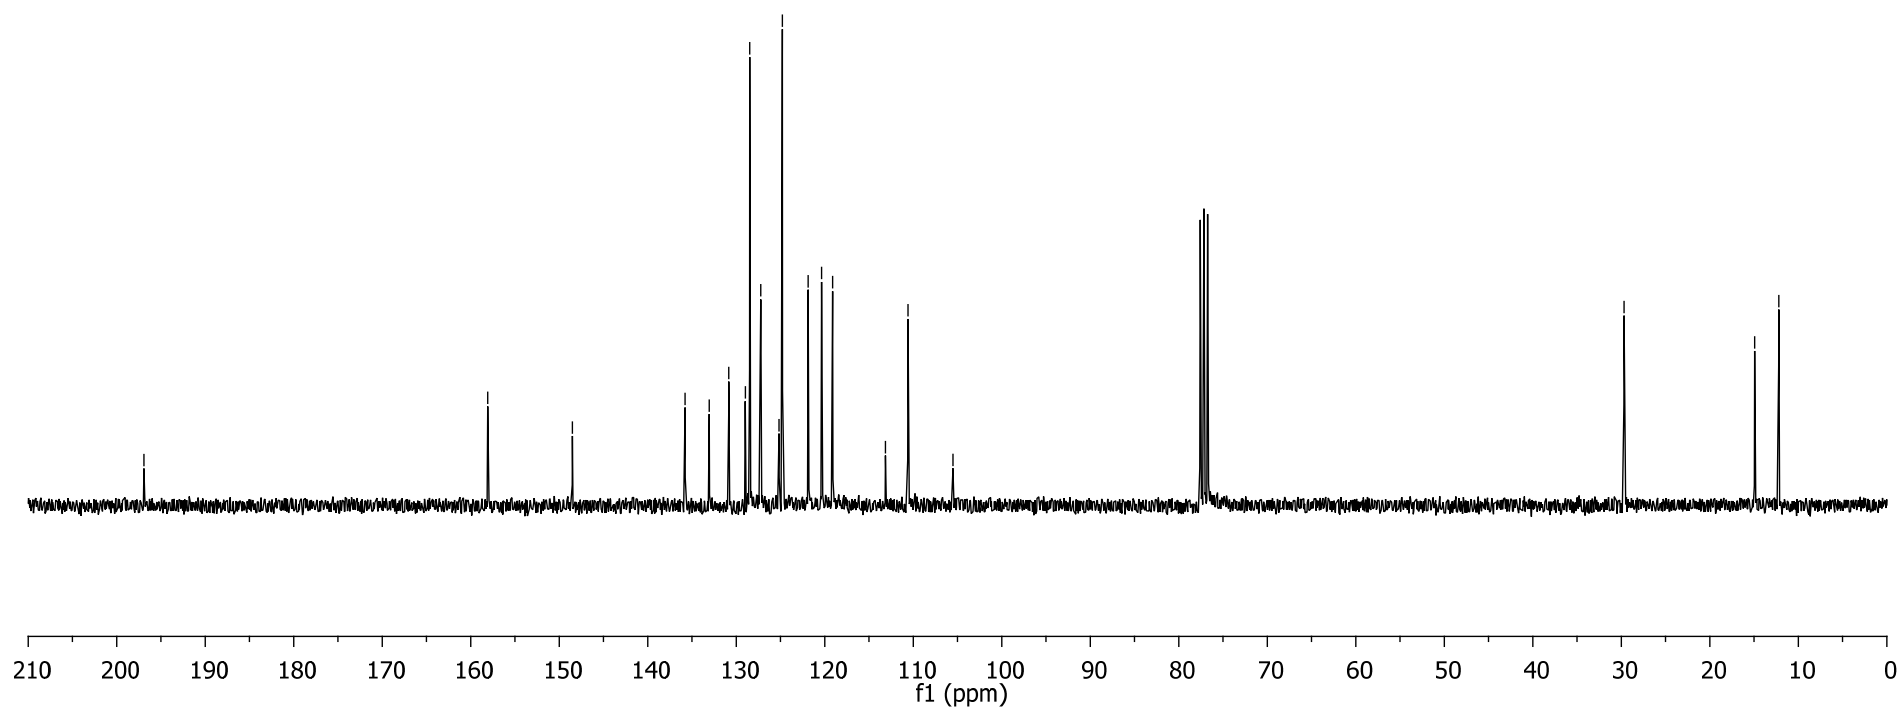

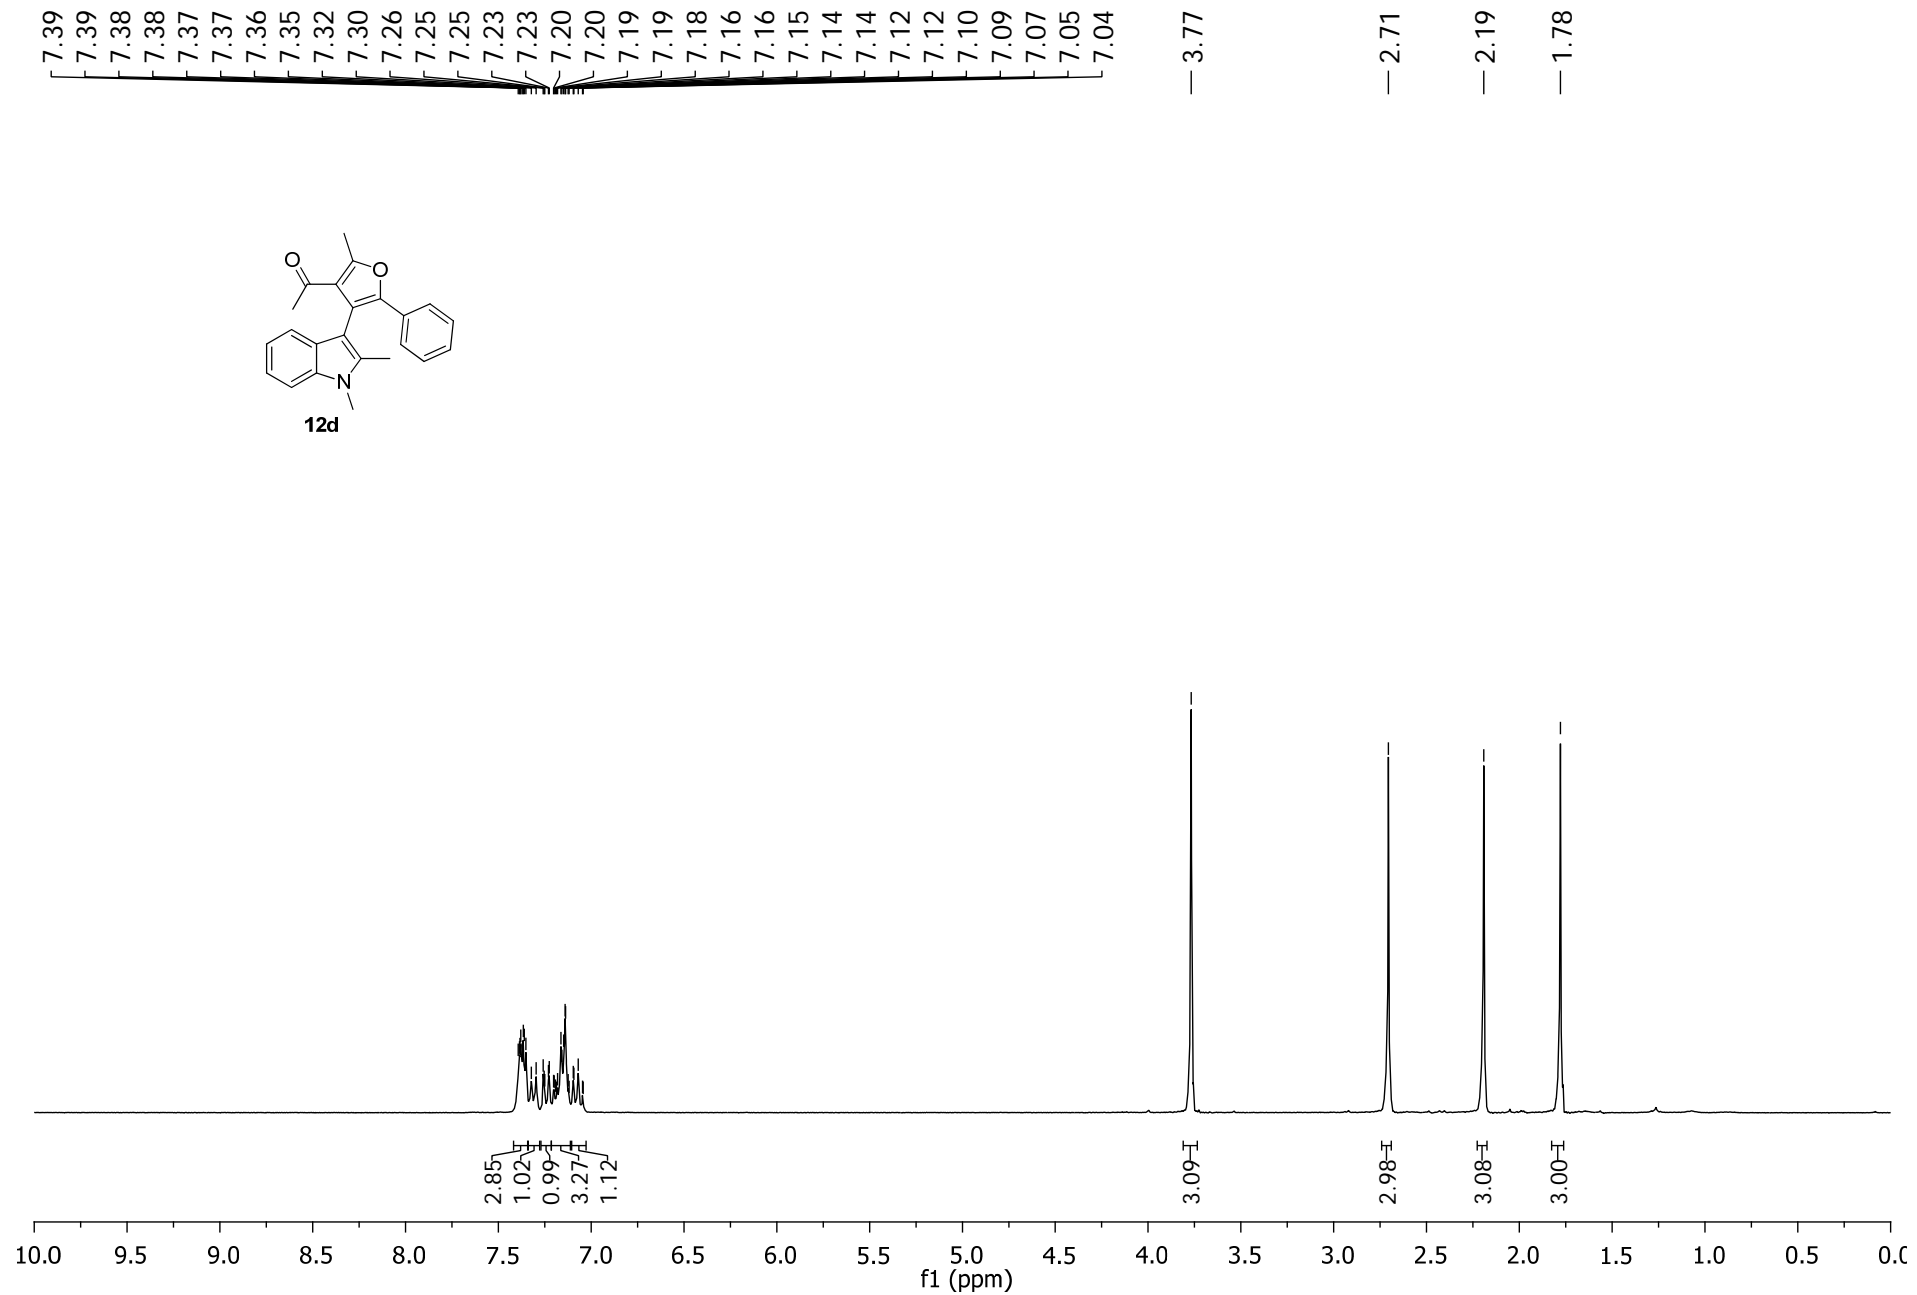



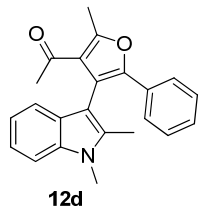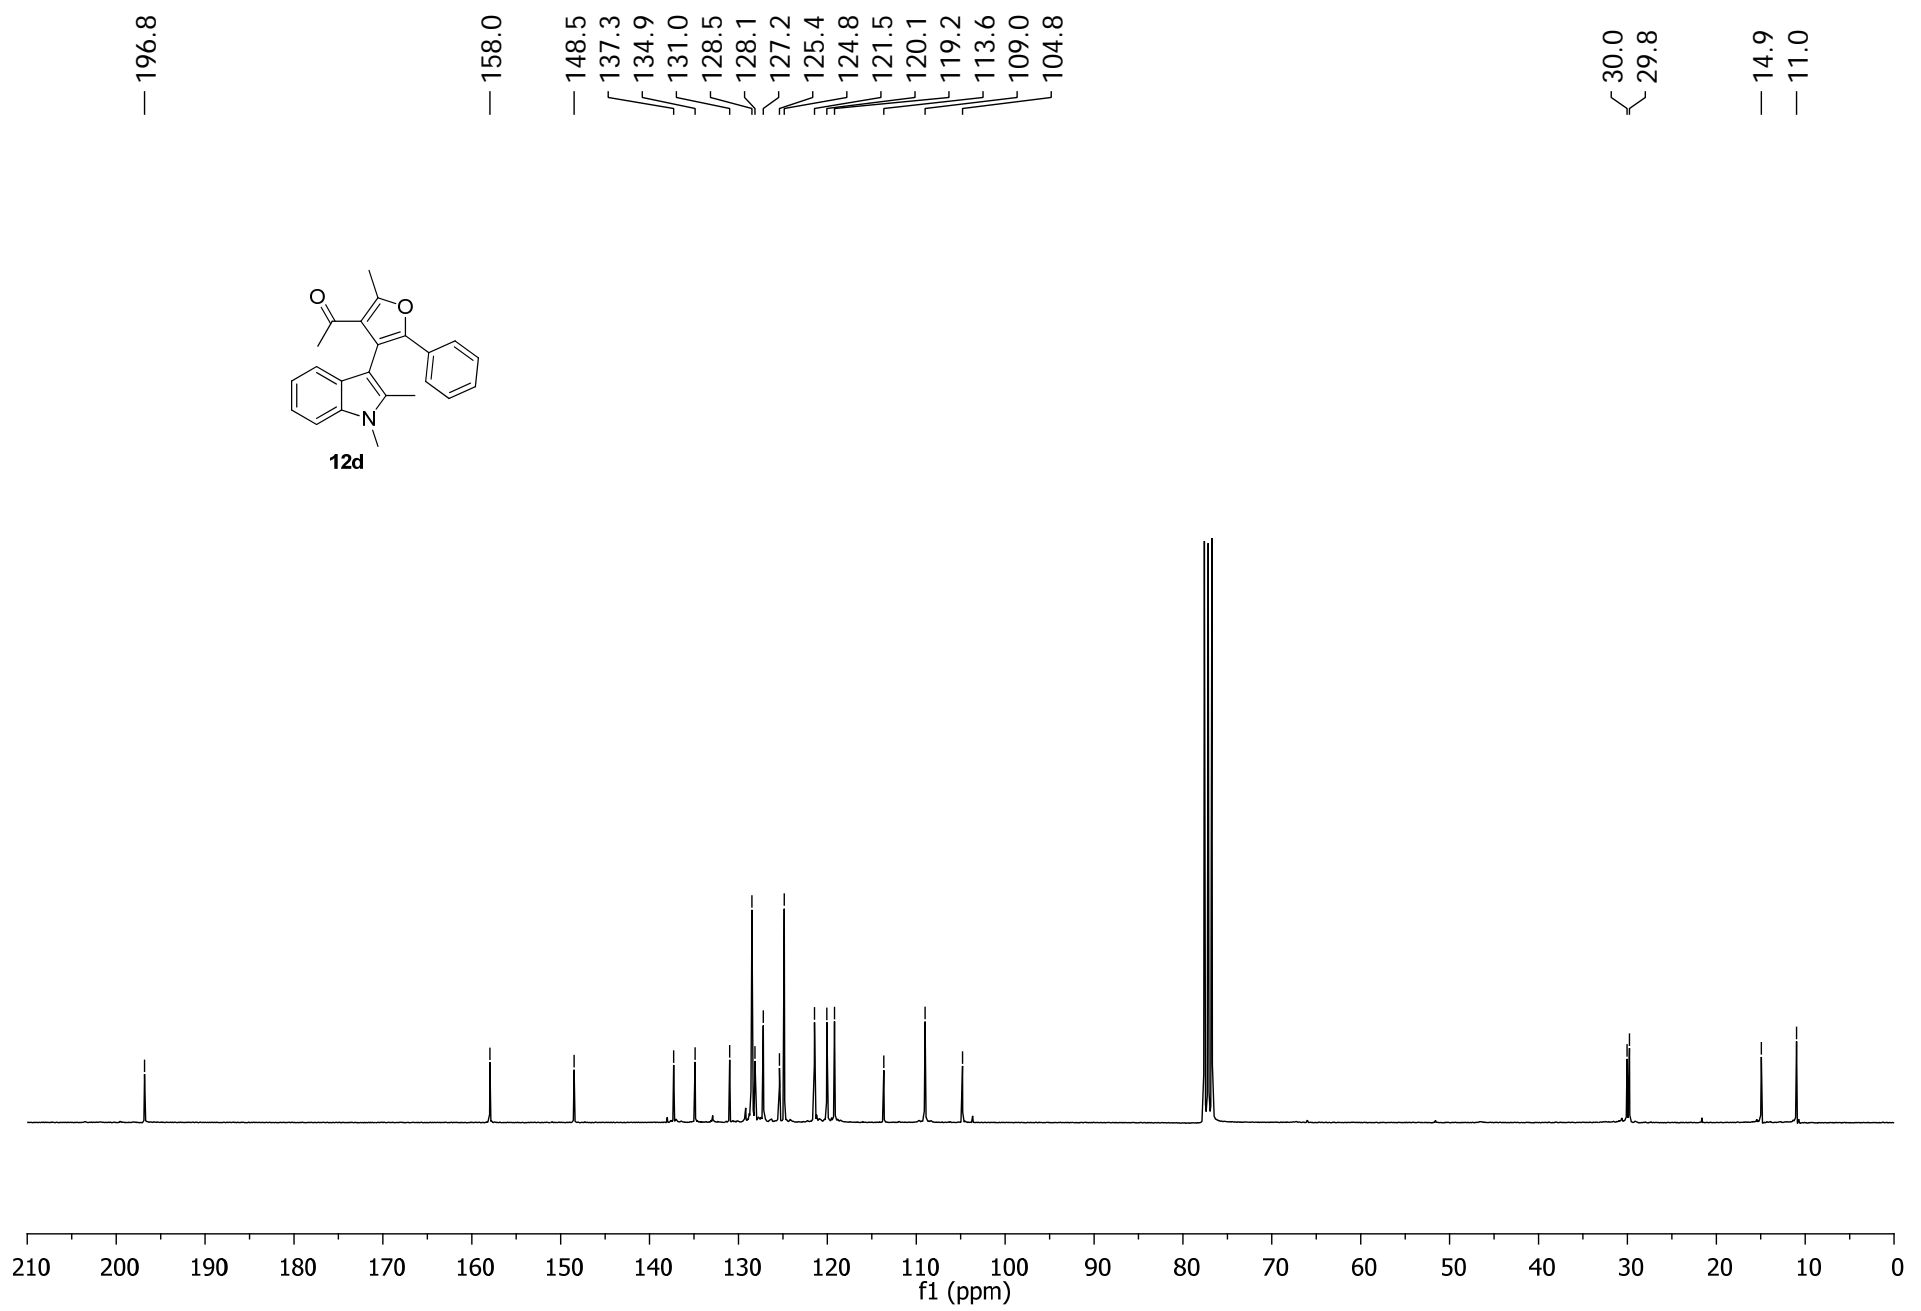

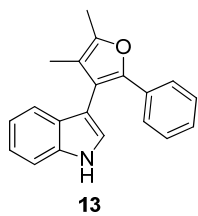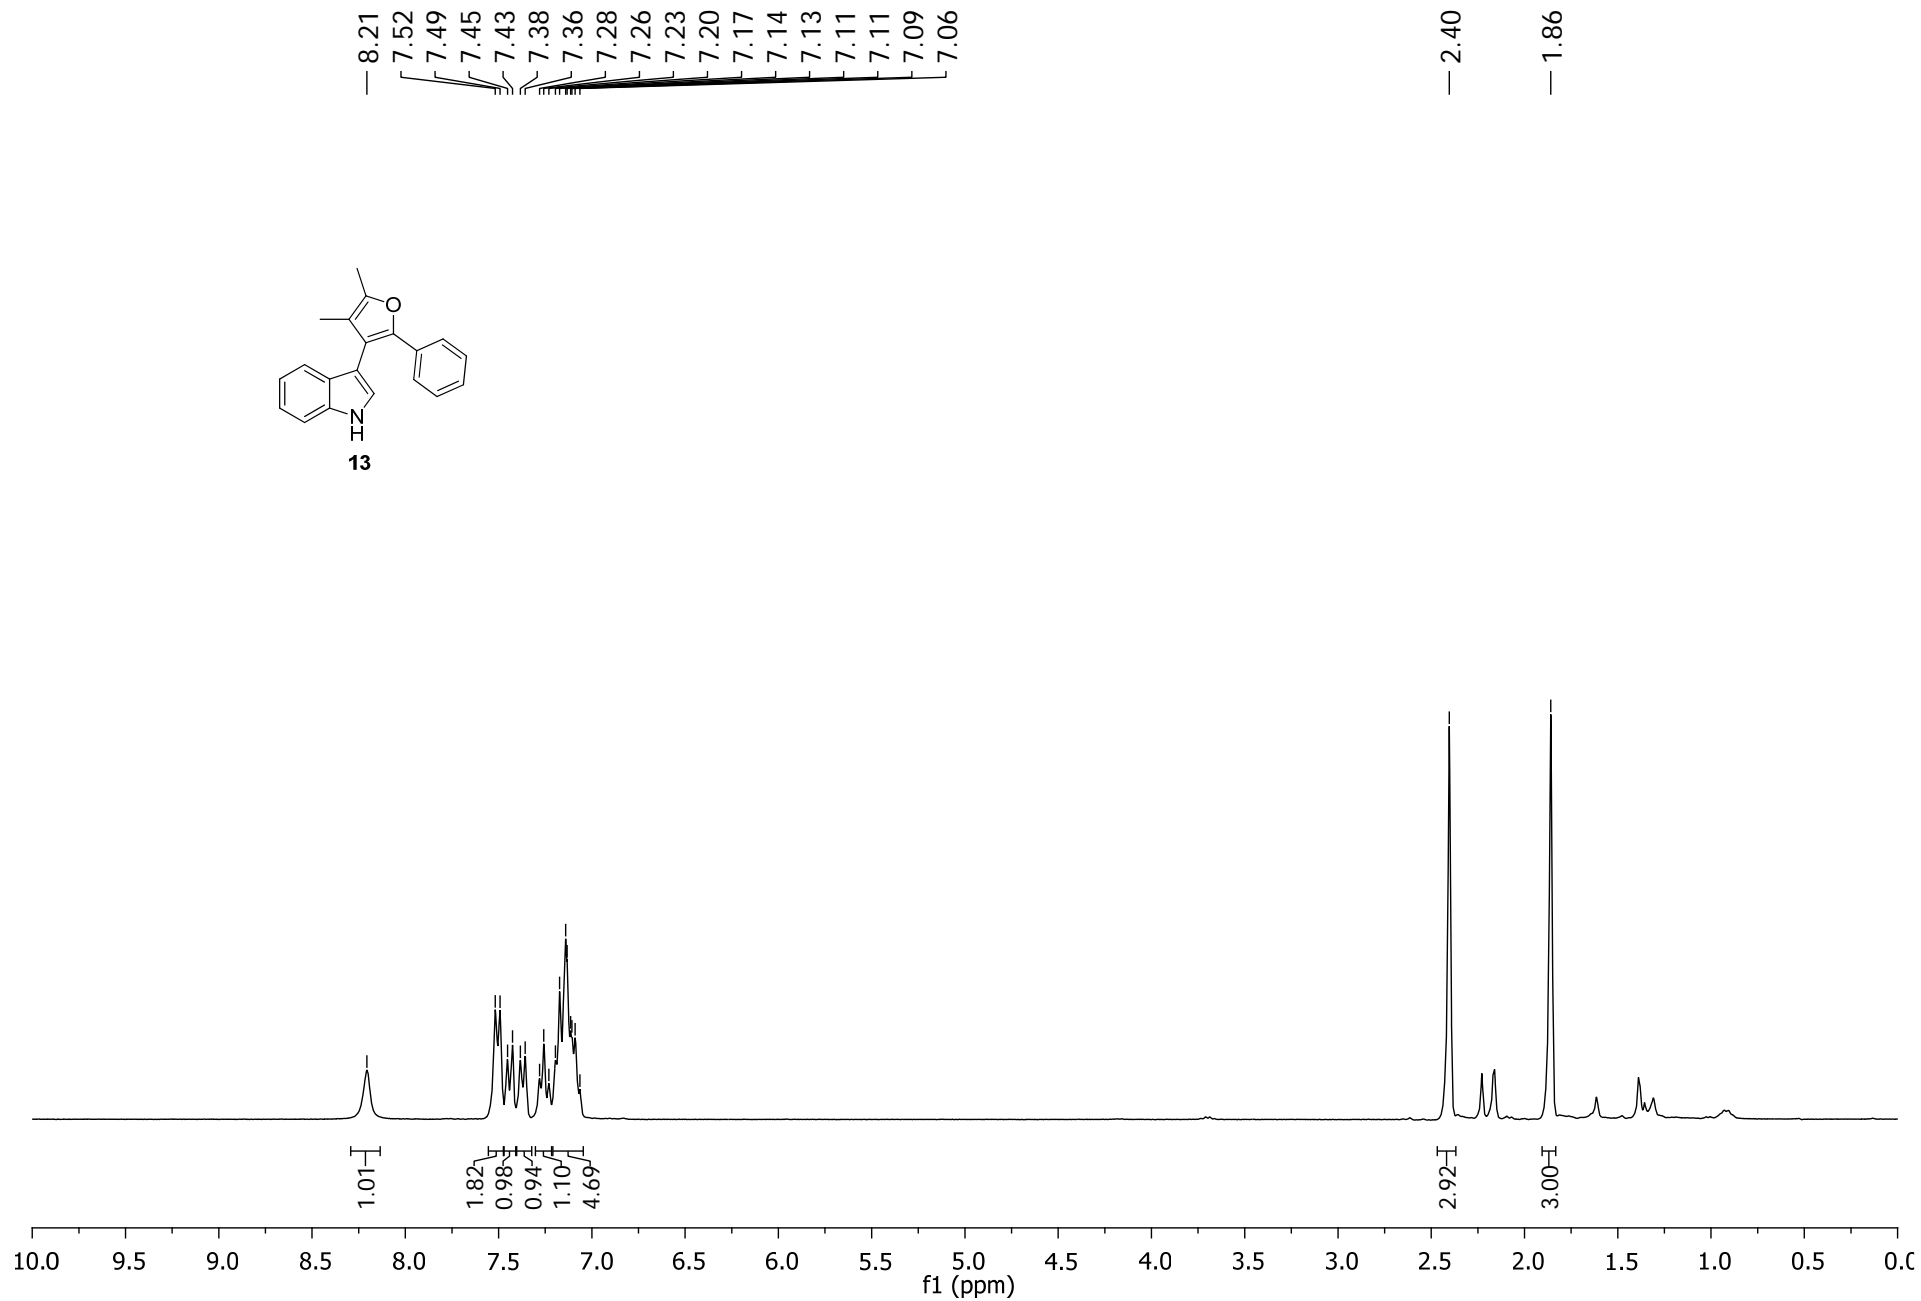

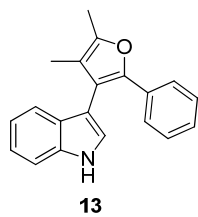

147.1  
146.6  
136.3  
131.9  
128.2  
127.1  
126.3  
124.8  
123.3  
122.3  
120.6  
119.9  
118.1  
116.5  
111.2  
109.5

12.0  
9.1

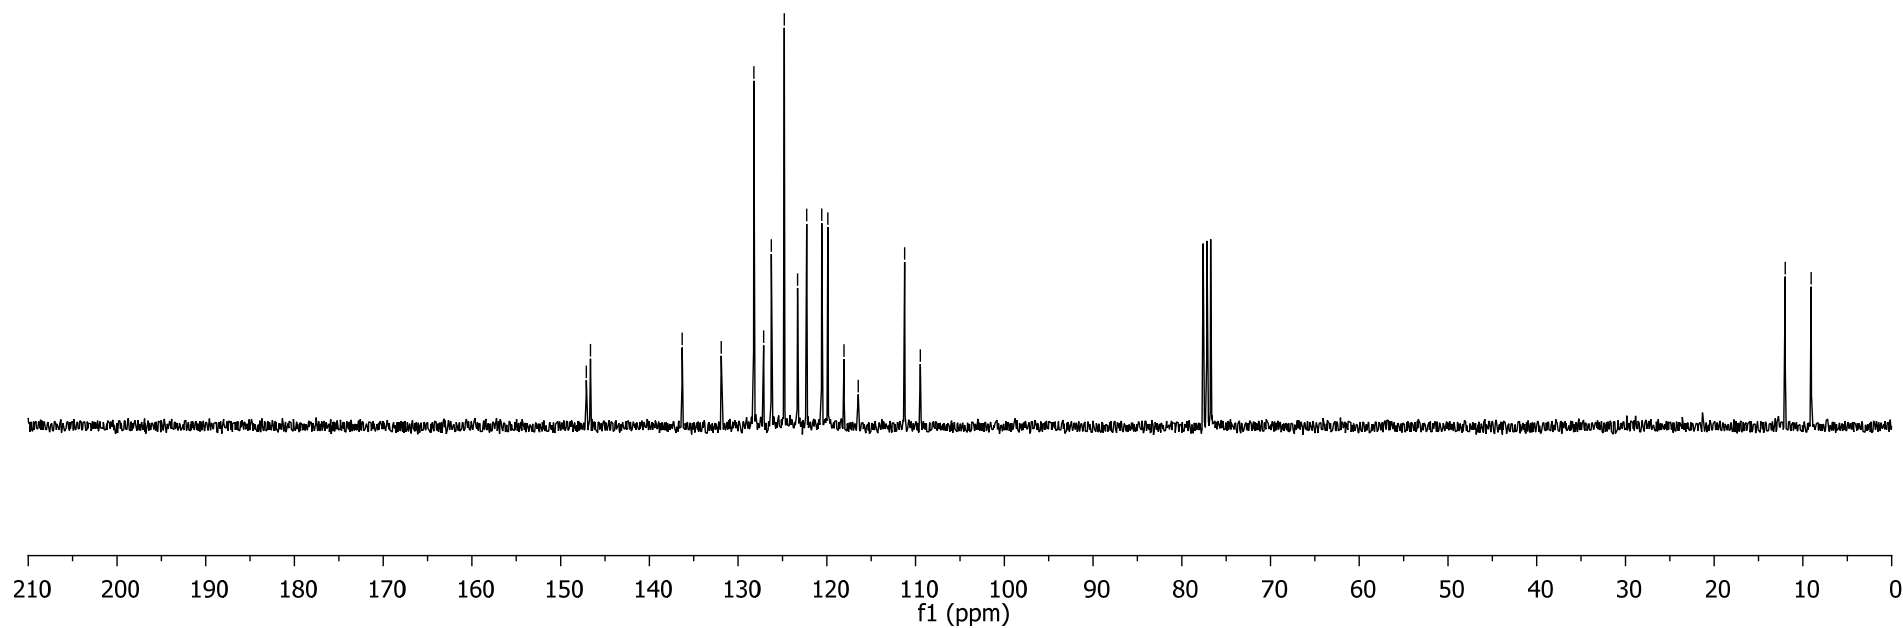

Supplement: c6ob02125e1.pdf [file c6ob02125e1.pdf]
